# Supplementary material
Source: MDPI journal article supplement (https://www.mdpi.com/2073-4352/6/6/65)
Supplement: s1 [file s1]

# Supplementary Material: Synthesis and 3D Network Architecture of 1- and 16-Hydrated Salts of 4-Dimethylaminopyridinium Decavanadate, $(\text{DMAPH})_6[\text{V}_{10}\text{O}_{28}] \cdot n\text{H}_2\text{O}$

Eduardo Sánchez-Lara, Aarón Pérez-Benítez, Samuel Treviño, Ángel Mendoza, Francisco J. Meléndez, Enrique Sánchez-Mora, Sylvain Bernès and Enrique González-Vergara

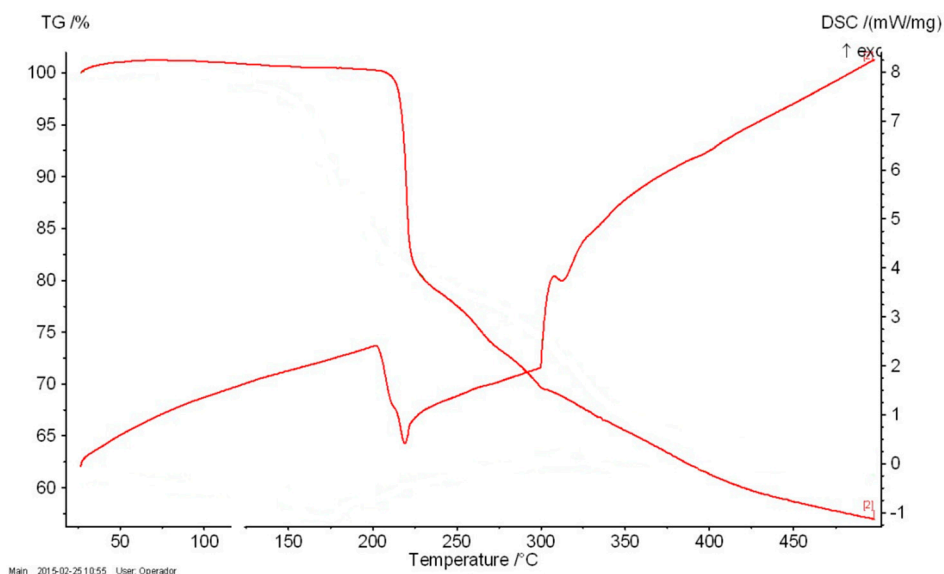

Figure S1. TGA and DTA for (1).

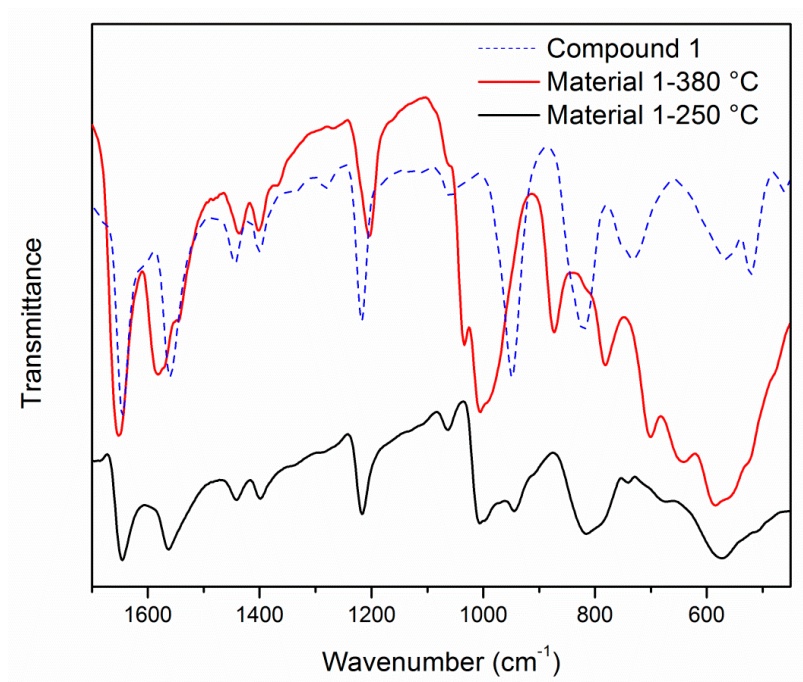

Figure S2. FT-IR spectra of (1), as prepared sample, and the residue at different temperatures.

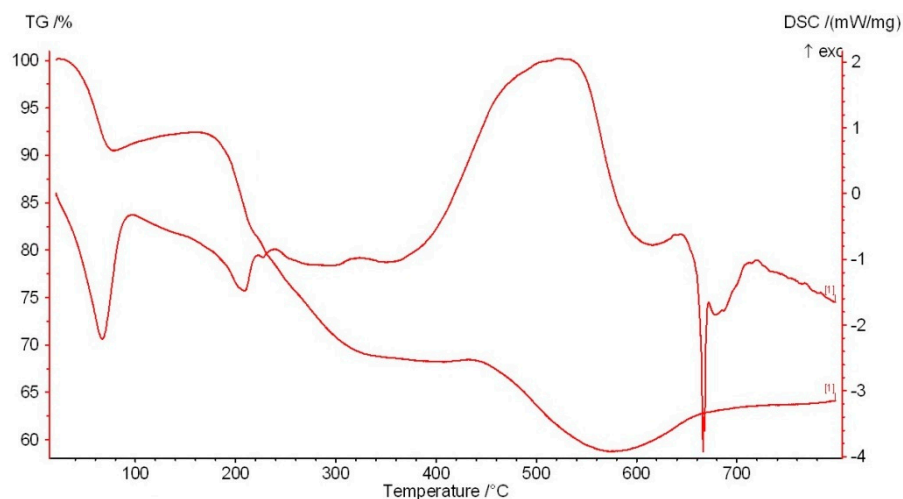

**Figure S3.** TGA and DTA for (2).

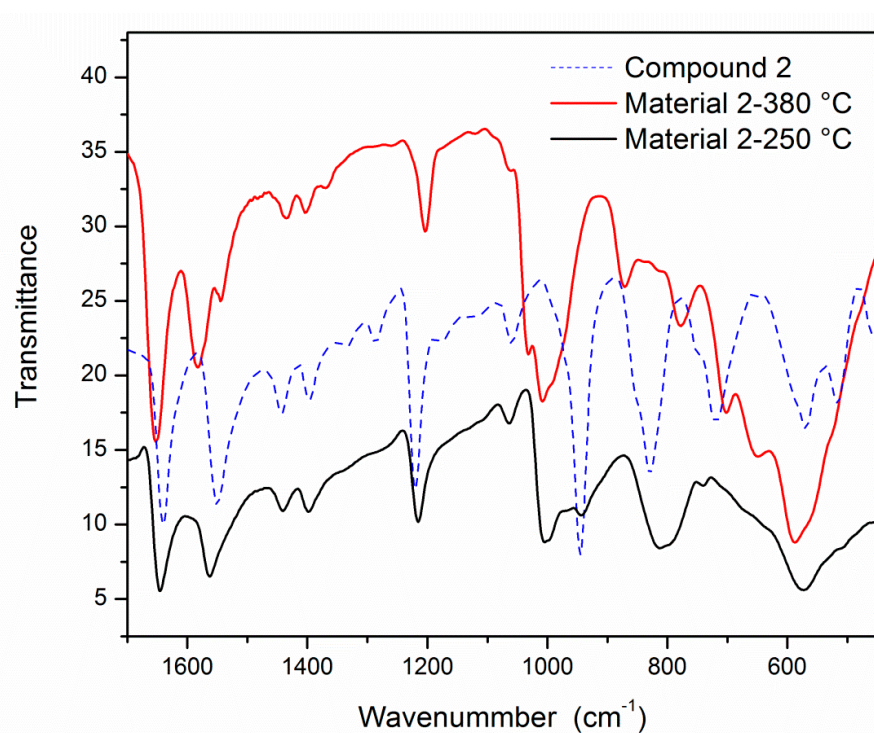

**Figure S4.** FT-IR spectra of (2), as newly synthesized sample, and the residue at different temperatures.

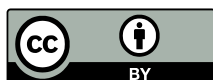

© 2016 by the authors. Submitted for possible open access publication under the terms and conditions of the Creative Commons Attribution (CC-BY) license (<http://creativecommons.org/licenses/by/4.0/>).
