# Supplementary material
Source: MDPI journal article supplement (https://www.mdpi.com/2073-4352/6/6/65)
Supplement: s1 [file s1]

Archive with 2 entries (2 files):
- DMAP6_Cr.cif
- crystals-133482-Supplementary materials.pdf
