# Supplementary material
Source: MDPI journal article supplement (https://www.mdpi.com/2073-4352/6/6/65)
Supplement: s1 [file s1 › DMAP6_Cr.cif]

data_global

#============================================================================
# 1. SUBMISSION DETAILS
#============================================================================

_publ_contact_author          # Name and address of author for correspondence
;

;
_publ_contact_author_phone       'Enrique Gonzalez'
_publ_contact_author_fax          ?
_publ_contact_author_email        enrique.gonzalez@correo.buap.mx

_publ_requested_journal          'Crystals'
_publ_requested_coeditor_name     ?
_publ_contact_letter              ?
                                  
#============================================================================
# 2. PROCESSING SUMMARY (IUCr Office Use Only)
#============================================================================

_journal_date_recd_electronic     ?

_journal_date_to_coeditor         ?
_journal_date_from_coeditor       ?
_journal_date_accepted            ?

_journal_date_printers_first      ?
_journal_date_printers_final      ?
_journal_date_proofs_out          ?
_journal_date_proofs_in           ?

_journal_coeditor_name            ?
_journal_coeditor_code            ?
_journal_coeditor_notes           ?

_journal_techeditor_code          ?
_journal_techeditor_notes         ?

_journal_coden_ASTM               ?
_journal_name_full                ?
_journal_year                     ?
_journal_volume                   ?
_journal_issue                    ?
_journal_page_first               ?
_journal_page_last                ?

_journal_suppl_publ_number        ?
_journal_suppl_publ_pages         ?

#============================================================================
# 3. TITLE AND AUTHOR LIST
#============================================================================

_publ_section_title
;
Synthesis and 3D network architecture of two 1- and 16-hydrated salts of 
4-dimethylaminopyridinium decavanadate, (DMAPH)6[V10O28].nH2O
;

loop_
 _publ_author_name
 _publ_author_footnote
 _publ_author_email
 _publ_author_address

"S\'anchez-Lara, Eduardo" . esl_24@hotmail.com
;
Centro de Quimica-ICUAP
Benemerita Universidad Autonoma de Puebla
18 Sur y Av. San Claudio
Col. San Manuel
72570. Puebla, Pue.
Mexico
;

"P\'erez-Ben\'itez, Aar\'on" . aaronperezb@yahoo.com
;
Facultad de Ciencias Quimicas
Benemerita Universidad Autonoma de Puebla
18 Sur y Av. San Claudio
Col. San Manuel
72570. Puebla, Pue.
Mexico
;

"Trevi\~no, Samuel" . samuel_trevino@hotmail.com
;
Facultad de Ciencias Quimicas
Benemerita Universidad Autonoma de Puebla
18 Sur y Av. San Claudio
Col. San Manuel
72570. Puebla, Pue.
Mexico
;

"Mendoza, \'Angel" . angel.mendoza@correo.buap.mx
;
Centro de Quimica-ICUAP
Benemerita Universidad Autonoma de Puebla
18 Sur y Av. San Claudio
Col. San Manuel
72570. Puebla, Pue.
Mexico
;

"Mel\'endez, Francisco J." . francisco.melendez@correo.buap.mx
;
Facultad de Ciencias Quimicas
Benemerita Universidad Autonoma de Puebla
18 Sur y Av. San Claudio
Col. San Manuel
72570. Puebla, Pue.
Mexico
;

"Sa\'nchez-Mora, Enrique" . esanchez@ifuap.buap.mx
;
Instituto de Fisica
Benemerita Universidad Autonoma de Puebla
Apdo. Postal J-48
72570. Puebla, Pue. 
Mexico
;

"Bern\`es, Sylvain" . sylvain_bernes@hotmail.com
;
Instituto de Fisica
Benemerita Universidad Autonoma de Puebla
Apdo. Postal J-48
72570. Puebla, Pue. 
Mexico
;

"Gonzalez-Vergara, Enrique" . enrique.gonzalez@correo.buap.mx
;
Centro de Quimica-ICUAP
Benemerita Universidad Autonoma de Puebla
18 Sur y Av. San Claudio
Col. San Manuel
72570. Puebla, Pue.
Mexico
;

#===========================================================================
# STRUCTURE 1
#===========================================================================

data_1

# Clave ICUAP: V10DMAP6_2_Cu
# Clave IFUAP: V10DMAP6_2_Cu

_database_code_CAS               ?
_database_code_CSD               ?
 
_audit_creation_method            SHELXL-2014
_audit_creation_date              '2015-05-14'
_shelx_SHELXL_version_number      '2014/7'

loop_
 _audit_contact_author_name       
 _audit_contact_author_address
 _audit_contact_author_email
 _audit_contact_author_fax
 _audit_contact_author_phone

  'Bern\`es, Sylvain'
;
Instituto de F\'isica
Benem\'erita Universidad Aut\'onoma de Puebla
Av. San Claudio y 18 Sur
72570 Puebla, Pue.
Mexico
;
sylvain_bernes@Hotmail.com  .  (+52)(222)2295500*2002
 
_chemical_name_systematic         ? 
_chemical_name_common             ? 
_chemical_melting_point           ? 
_chemical_formula_moiety          'O28 V10, 6(C7 H11 N2), H2 O' 
_chemical_formula_sum             'C42 H68 N12 O29 V10' 
_chemical_formula_weight          1714.48

_chemical_compound_source         ?
_chemical_absolute_configuration  .

_chemical_optical_rotation        .

_chemical_properties_physical     ?
_chemical_properties_biological   ?   
  
loop_ 
 _atom_type_symbol 
 _atom_type_description 
 _atom_type_scat_dispersion_real 
 _atom_type_scat_dispersion_imag 
 _atom_type_scat_source 
 'C'  'C'   0.0181   0.0091 
 'International Tables Vol C Tables 4.2.6.8 and 6.1.1.4' 
 'H'  'H'   0.0000   0.0000 
 'International Tables Vol C Tables 4.2.6.8 and 6.1.1.4' 
 'N'  'N'   0.0311   0.0180 
 'International Tables Vol C Tables 4.2.6.8 and 6.1.1.4' 
 'O'  'O'   0.0492   0.0322 
 'International Tables Vol C Tables 4.2.6.8 and 6.1.1.4' 
 'V'  'V'   0.0687   2.1097 
 'International Tables Vol C Tables 4.2.6.8 and 6.1.1.4' 
  
_space_group_crystal_system       monoclinic 
_space_group_IT_number            14 
_space_group_name_H-M_alt         'P 21/n' 
_space_group_name_Hall            '-P 2yn' 
  
_shelx_space_group_comment        ? 
  
loop_ 
 _space_group_symop_operation_xyz 
 'x, y, z' 
 '-x+1/2, y+1/2, -z+1/2' 
 '-x, -y, -z' 
 'x-1/2, -y-1/2, z-1/2' 
  
_cell_length_a                    11.0212(2) 
_cell_length_b                    23.845(4) 
_cell_length_c                    12.20887(19) 
_cell_angle_alpha                 90 
_cell_angle_beta                  103.3414(17) 
_cell_angle_gamma                 90 
_cell_volume                      3122.0(5) 
_cell_formula_units_Z             2 
_cell_measurement_temperature     298(2) 
_cell_measurement_reflns_used     11726 
_cell_measurement_theta_min       4.1330 
_cell_measurement_theta_max       76.9890 
  
_exptl_crystal_description        needle 
_exptl_crystal_colour             orange 
_exptl_crystal_density_meas       ? 
_exptl_crystal_density_method     ? 
_exptl_crystal_density_diffrn     1.824 
_exptl_crystal_F_000              1732 
_exptl_transmission_factor_min    ? 
_exptl_transmission_factor_max    ? 
_exptl_crystal_size_max           0.757 
_exptl_crystal_size_mid           0.173 
_exptl_crystal_size_min           0.127

loop_
_exptl_crystal_face_index_h
_exptl_crystal_face_index_k
_exptl_crystal_face_index_l
_exptl_crystal_face_perp_dist
_exptl_oxdiff_crystal_face_indexfrac_h
_exptl_oxdiff_crystal_face_indexfrac_k
_exptl_oxdiff_crystal_face_indexfrac_l
_exptl_oxdiff_crystal_face_x
_exptl_oxdiff_crystal_face_y
_exptl_oxdiff_crystal_face_z
   0   13   -4 0.0822 -0.0000 13.0000 -4.0000 -0.9333 -0.3097 -0.0867
   0  -12    5 0.0925  0.0000 -12.0000  5.0000  0.8988  0.4479  0.1128
   7    1   -4 0.3289  7.0000  1.0000 -4.0000 -0.0995 -0.0719 -1.0144
  -6    8    0 0.3301 -6.0000  8.0000 -0.0000 -0.5707 -0.2366  0.7928
  -6   -5    5 0.3426 -6.0000 -5.0000  5.0000  0.3911  0.1971  0.9046
   0   -9   -6 0.0614 -0.0000 -9.0000 -6.0000  0.3959 -0.8725 -0.1599
   0    9    6 0.0653  0.0000  9.0000  6.0000 -0.3959  0.8725  0.1599
  -6    4    5 0.3155 -6.0000  4.0000  5.0000 -0.1759  0.3259  0.9140
  -7   -5    0 0.3663 -7.0000 -5.0000 -0.0000  0.2373 -0.4812  0.9099
   7   -1   -4 0.3315  7.0000 -1.0000 -4.0000  0.0266 -0.1005 -1.0165
   0   12    5 0.0677  0.0000 12.0000  5.0000 -0.6134  0.7915  0.1379
   0  -15    2 0.0820  0.0000 -15.0000  2.0000  1.0022  0.0332  0.0345
   0    3   -8 0.0704 -0.0000  3.0000 -8.0000 -0.4173 -0.9486 -0.1975
   0   -5    7 0.0836  0.0000 -5.0000  7.0000  0.5148  0.7960  0.1703
 
_exptl_absorpt_coefficient_mu     12.794 
_shelx_estimated_absorpt_T_min    0.037 
_shelx_estimated_absorpt_T_max    0.294 
_exptl_absorpt_correction_type    analytical 
_exptl_absorpt_correction_T_min   0.034 
_exptl_absorpt_correction_T_max   0.321 
_exptl_absorpt_process_details    'CrysAlisPro (Agilent, 2013)' 
 
_exptl_absorpt_special_details    ? 

_diffrn_ambient_temperature       298(2)
_diffrn_radiation_type            CuK\a
_diffrn_radiation_wavelength      1.5418
_diffrn_source                    'Enhance (Cu) X-ray Source'
_diffrn_detector                  'CCD plate'
_diffrn_detector_type             Atlas
_diffrn_radiation_monochromator   graphite
_diffrn_measurement_device_type   'Xcalibur, Atlas, Gemini'
_diffrn_measurement_method        '\w scans'
_diffrn_detector_area_resol_mean  10.5564 

_diffrn_measurement_details
;
#__ type_ start__ end____ width___ exp.time_
  1 omega -117.00  -18.00   1.0000    8.0400
omega____ theta____ kappa____ phi______ frames
    -      -40.9073  -38.0000   90.0000 99

#__ type_ start__ end____ width___ exp.time_
  2 omega  -44.00    8.00   1.0000    8.0400
omega____ theta____ kappa____ phi______ frames
    -      -40.9073   38.0000 -120.0000 52

#__ type_ start__ end____ width___ exp.time_
  3 omega -114.00  -73.00   1.0000    8.0400
omega____ theta____ kappa____ phi______ frames
    -      -40.9073 -137.0000  135.0000 41

#__ type_ start__ end____ width___ exp.time_
  4 omega   41.00   77.00   1.0000    8.0400
omega____ theta____ kappa____ phi______ frames
    -       40.9073 -137.0000  135.0000 36

#__ type_ start__ end____ width___ exp.time_
  5 omega   53.00   94.00   1.0000    8.0400
omega____ theta____ kappa____ phi______ frames
    -       40.9073 -125.0000 -120.0000 41

#__ type_ start__ end____ width___ exp.time_
  6 omega   40.00   98.00   1.0000    8.0400
omega____ theta____ kappa____ phi______ frames
    -      115.0000  -45.0000  -60.0000 58

#__ type_ start__ end____ width___ exp.time_
  7 omega   62.00  149.00   1.0000    8.0400
omega____ theta____ kappa____ phi______ frames
    -      115.0000  178.0000    0.0000 87

#__ type_ start__ end____ width___ exp.time_
  8 omega   54.00   98.00   1.0000    8.0400
omega____ theta____ kappa____ phi______ frames
    -      115.0000  -45.0000 -120.0000 44

#__ type_ start__ end____ width___ exp.time_
  9 omega   91.00  143.00   1.0000    8.0400
omega____ theta____ kappa____ phi______ frames
    -      115.0000   45.0000 -180.0000 52

#__ type_ start__ end____ width___ exp.time_
 10 omega  112.00  145.00   1.0000    8.0400
omega____ theta____ kappa____ phi______ frames
    -      115.0000  178.0000   60.0000 33

#__ type_ start__ end____ width___ exp.time_
 11 omega   51.00  115.00   1.0000    8.0400
omega____ theta____ kappa____ phi______ frames
    -      115.0000 -111.0000   90.0000 64

#__ type_ start__ end____ width___ exp.time_
 12 omega   89.00  116.00   1.0000    8.0400
omega____ theta____ kappa____ phi______ frames
    -      115.0000 -111.0000    0.0000 27

#__ type_ start__ end____ width___ exp.time_
 13 omega   42.00   69.00   1.0000    8.0400
omega____ theta____ kappa____ phi______ frames
    -      115.0000 -111.0000    0.0000 27

#__ type_ start__ end____ width___ exp.time_
 14 omega   71.00  103.00   1.0000    8.0400
omega____ theta____ kappa____ phi______ frames
    -      115.0000  -77.0000  120.0000 32

#__ type_ start__ end____ width___ exp.time_
 15 omega  111.00  138.00   1.0000    8.0400
omega____ theta____ kappa____ phi______ frames
    -      115.0000  -77.0000  120.0000 27

#__ type_ start__ end____ width___ exp.time_
 16 omega   37.00   91.00   1.0000    8.0400
omega____ theta____ kappa____ phi______ frames
    -      115.0000  -30.0000    0.0000 54

#__ type_ start__ end____ width___ exp.time_
 17 omega  117.00  167.00   1.0000    8.0400
omega____ theta____ kappa____ phi______ frames
    -      115.0000   45.0000   30.0000 50

#__ type_ start__ end____ width___ exp.time_
 18 omega   58.00   83.00   1.0000    8.0400
omega____ theta____ kappa____ phi______ frames
    -      115.0000  178.0000   60.0000 25

#__ type_ start__ end____ width___ exp.time_
 19 omega   65.00   94.00   1.0000    8.0400
omega____ theta____ kappa____ phi______ frames
    -      115.0000  -95.0000  120.0000 29

#__ type_ start__ end____ width___ exp.time_
 20 omega  113.00  172.00   1.0000    8.0400
omega____ theta____ kappa____ phi______ frames
    -      115.0000   61.0000    0.0000 59

#__ type_ start__ end____ width___ exp.time_
 21 omega -115.00  -11.00   1.0000    8.0400
omega____ theta____ kappa____ phi______ frames
    -      -40.9073  -57.0000    0.0000 104

#__ type_ start__ end____ width___ exp.time_
 22 omega  -50.00   35.00   1.0000    8.0400
omega____ theta____ kappa____ phi______ frames
    -      -40.9073   38.0000  150.0000 85

#__ type_ start__ end____ width___ exp.time_
 23 omega -120.00   -7.00   1.0000    8.0400
omega____ theta____ kappa____ phi______ frames
    -      -40.9073  -77.0000  -90.0000 113

#__ type_ start__ end____ width___ exp.time_
 24 omega  -50.00   35.00   1.0000    8.0400
omega____ theta____ kappa____ phi______ frames
    -      -40.9073   38.0000   30.0000 85

#__ type_ start__ end____ width___ exp.time_
 25 omega   18.00   98.00   1.0000    8.0400
omega____ theta____ kappa____ phi______ frames
    -       40.9073 -125.0000  -30.0000 80

#__ type_ start__ end____ width___ exp.time_
 26 omega   84.00  178.00   1.0000    8.0400
omega____ theta____ kappa____ phi______ frames
    -      115.0000   30.0000  120.0000 94

#__ type_ start__ end____ width___ exp.time_
 27 omega   81.00  178.00   1.0000    8.0400
omega____ theta____ kappa____ phi______ frames
    -      115.0000   77.0000 -180.0000 97

#__ type_ start__ end____ width___ exp.time_
 28 omega   87.00  178.00   1.0000    8.0400
omega____ theta____ kappa____ phi______ frames
    -      115.0000   45.0000  -60.0000 91

#__ type_ start__ end____ width___ exp.time_
 29 omega   84.00  178.00   1.0000    8.0400
omega____ theta____ kappa____ phi______ frames
    -      115.0000   30.0000   60.0000 94

#__ type_ start__ end____ width___ exp.time_
 30 omega   40.00   98.00   1.0000    8.0400
omega____ theta____ kappa____ phi______ frames
    -      115.0000  -45.0000   60.0000 58

#__ type_ start__ end____ width___ exp.time_
 31 omega   81.00  178.00   1.0000    8.0400
omega____ theta____ kappa____ phi______ frames
    -      115.0000   77.0000  -30.0000 97

#__ type_ start__ end____ width___ exp.time_
 32 omega   87.00  178.00   1.0000    8.0400
omega____ theta____ kappa____ phi______ frames
    -      115.0000   45.0000  150.0000 91

#__ type_ start__ end____ width___ exp.time_
 33 omega   31.00  109.00   1.0000    8.0400
omega____ theta____ kappa____ phi______ frames
    -      115.0000  -95.0000  -60.0000 78

#__ type_ start__ end____ width___ exp.time_
 34 omega   87.00  178.00   1.0000    8.0400
omega____ theta____ kappa____ phi______ frames
    -      115.0000   45.0000  -90.0000 91

#__ type_ start__ end____ width___ exp.time_
 35 omega   87.00  178.00   1.0000    8.0400
omega____ theta____ kappa____ phi______ frames
    -      115.0000   45.0000 -120.0000 91

#__ type_ start__ end____ width___ exp.time_
 36 omega -120.00   -7.00   1.0000    8.0400
omega____ theta____ kappa____ phi______ frames
    -      -40.9073  -77.0000   90.0000 113

#__ type_ start__ end____ width___ exp.time_
 37 omega -120.00   -7.00   1.0000    8.0400
omega____ theta____ kappa____ phi______ frames
    -      -40.9073  -77.0000    0.0000 113

#__ type_ start__ end____ width___ exp.time_
 38 omega -115.00  -69.00   1.0000    8.0400
omega____ theta____ kappa____ phi______ frames
    -      -40.9073 -132.0000  -47.0000 46

#__ type_ start__ end____ width___ exp.time_
 39 omega  -96.00    3.00   1.0000    8.0400
omega____ theta____ kappa____ phi______ frames
    -      -40.9073  125.0000  150.0000 99

#__ type_ start__ end____ width___ exp.time_
 40 omega -120.00   -7.00   1.0000    8.0400
omega____ theta____ kappa____ phi______ frames
    -      -40.9073  -77.0000 -180.0000 113
;

_diffrn_orient_matrix_UB_11       0.0111000000
_diffrn_orient_matrix_UB_12       -0.0630087000
_diffrn_orient_matrix_UB_13       0.0285379000
_diffrn_orient_matrix_UB_21       0.0585137000
_diffrn_orient_matrix_UB_22       0.0143133000
_diffrn_orient_matrix_UB_23       0.1239414000
_diffrn_orient_matrix_UB_31       -0.1307385000
_diffrn_orient_matrix_UB_32       0.0010463000
_diffrn_orient_matrix_UB_33       0.0250787000
 
_diffrn_reflns_number             42521 
_diffrn_reflns_av_unetI/netI      0.0237 
_diffrn_reflns_av_R_equivalents   0.0444 
_diffrn_reflns_limit_h_min        -13 
_diffrn_reflns_limit_h_max        10 
_diffrn_reflns_limit_k_min        -28 
_diffrn_reflns_limit_k_max        28 
_diffrn_reflns_limit_l_min        -14 
_diffrn_reflns_limit_l_max        14 
_diffrn_reflns_theta_min          3.707 
_diffrn_reflns_theta_max          67.078 
_diffrn_reflns_theta_full         67.078 
_diffrn_measured_fraction_theta_max   1.000 
_diffrn_measured_fraction_theta_full  1.000 
_diffrn_reflns_Laue_measured_fraction_max    1.000 
_diffrn_reflns_Laue_measured_fraction_full   1.000 
_diffrn_reflns_point_group_measured_fraction_max   1.000 
_diffrn_reflns_point_group_measured_fraction_full  1.000 
_reflns_number_total              5572 
_reflns_number_gt                 4352 
_reflns_threshold_expression      'I > 2\s(I)' 
_reflns_Friedel_coverage          0.000 
_reflns_Friedel_fraction_max      . 
_reflns_Friedel_fraction_full     . 
  
_reflns_special_details           ?
  
_computing_data_collection        'CrysAlisPro, Agilent Technologies'
_computing_cell_refinement         CrysAlisPro
_computing_data_reduction          CrysAlisPro
_computing_structure_solution     'SHELXS-2014/7 (Sheldrick, 2015)' 
_computing_structure_refinement   'SHELXL-2014/7 (Sheldrick, 2015)'
_computing_molecular_graphics     'SHELXTL and MERCURY'
_computing_publication_material    SHELXL-2014/7

_refine_special_details           ? 

_refine_ls_structure_factor_coef  Fsqd 
_refine_ls_matrix_type            full 
_refine_ls_weighting_scheme       calc 
_refine_ls_weighting_details 
'w=1/[\s^2^(Fo^2^)+(0.0664P)^2^+3.0425P] where P=(Fo^2^+2Fc^2^)/3' 
_atom_sites_solution_primary      direct 
_atom_sites_solution_secondary    difmap 
_atom_sites_solution_hydrogens    difmap 
_refine_ls_hydrogen_treatment     mixed 
_refine_ls_extinction_method      none 
_refine_ls_extinction_coef        . 
_refine_ls_number_reflns          5572 
_refine_ls_number_parameters      445 
_refine_ls_number_restraints      6 
_refine_ls_number_constraints     0
_refine_ls_R_factor_all           0.0583 
_refine_ls_R_factor_gt            0.0424 
_refine_ls_wR_factor_ref          0.1269 
_refine_ls_wR_factor_gt           0.1156 
_refine_ls_goodness_of_fit_ref    1.048 
_refine_ls_restrained_S_all       1.047 
_refine_ls_shift/su_max           0.001 
_refine_ls_shift/su_mean          0.000 
  
loop_ 
 _atom_site_label 
 _atom_site_type_symbol 
 _atom_site_fract_x 
 _atom_site_fract_y 
 _atom_site_fract_z 
 _atom_site_U_iso_or_equiv 
 _atom_site_adp_type 
 _atom_site_occupancy 
 _atom_site_site_symmetry_order 
 _atom_site_calc_flag 
 _atom_site_refinement_flags_posn 
 _atom_site_refinement_flags_adp 
 _atom_site_refinement_flags_occupancy 
 _atom_site_disorder_assembly 
 _atom_site_disorder_group 
V1 V 0.69534(5) 0.56527(2) 0.98087(5) 0.02531(16) Uani 1 1 d . . . . . 
V2 V 0.45242(5) 0.63155(2) 0.88266(5) 0.02872(17) Uani 1 1 d . . . . . 
V3 V 0.30779(5) 0.56410(2) 1.03173(5) 0.02502(16) Uani 1 1 d . . . . . 
V4 V 0.55281(5) 0.62672(2) 1.13915(5) 0.02899(17) Uani 1 1 d . . . . . 
V5 V 0.44957(5) 0.50280(2) 0.86243(4) 0.02266(16) Uani 1 1 d . . . . . 
O1 O 0.8395(2) 0.56593(9) 0.9732(2) 0.0353(6) Uani 1 1 d . . . . . 
O2 O 0.4111(2) 0.67852(10) 0.7868(2) 0.0410(6) Uani 1 1 d . . . . . 
O3 O 0.1640(2) 0.56419(9) 1.0405(2) 0.0345(6) Uani 1 1 d . . . . . 
O4 O 0.5953(2) 0.66946(10) 1.2426(2) 0.0411(6) Uani 1 1 d . . . . . 
O5 O 0.6207(2) 0.61653(9) 0.87985(18) 0.0296(5) Uani 1 1 d . . . . . 
O6 O 0.7058(2) 0.61159(9) 1.10510(18) 0.0286(5) Uani 1 1 d . . . . . 
O7 O 0.6271(2) 0.50268(8) 0.87824(18) 0.0240(5) Uani 1 1 d . . . . . 
O8 O 0.2993(2) 0.61522(9) 0.91530(18) 0.0281(5) Uani 1 1 d . . . . . 
O9 O 0.3841(2) 0.61131(9) 1.14013(18) 0.0297(5) Uani 1 1 d . . . . . 
O10 O 0.2970(2) 0.50167(8) 0.91492(18) 0.0233(5) Uani 1 1 d . . . . . 
O11 O 0.4173(2) 0.56132(9) 0.78227(18) 0.0296(5) Uani 1 1 d . . . . . 
O12 O 0.5035(2) 0.67166(9) 1.01441(18) 0.0317(5) Uani 1 1 d . . . . . 
O13 O 0.5831(2) 0.55231(9) 1.22545(18) 0.0302(5) Uani 1 1 d . . . . . 
O14 O 0.50118(18) 0.55625(9) 1.00452(15) 0.0230(5) Uani 1 1 d . . . . . 
N1 N 0.0865(3) 0.51641(14) 0.7688(3) 0.0444(8) Uani 1 1 d D . . . . 
H1 H 0.159(3) 0.5090(16) 0.817(3) 0.053 Uiso 1 1 d D U . . . 
C2 C -0.0179(4) 0.50414(14) 0.8024(3) 0.0427(10) Uani 1 1 d . . . . . 
H2A H -0.0111 0.4883 0.8731 0.051 Uiso 1 1 calc R U . . . 
C3 C -0.1328(4) 0.51401(17) 0.7369(4) 0.0478(10) Uani 1 1 d . . . . . 
H3A H -0.2033 0.5037 0.7618 0.057 Uiso 1 1 calc R U . . . 
C4 C -0.1457(4) 0.53960(17) 0.6325(3) 0.0483(10) Uani 1 1 d . . . . . 
C5 C -0.0350(5) 0.55231(19) 0.5991(3) 0.0583(12) Uani 1 1 d . . . . . 
H5A H -0.0390 0.5688 0.5294 0.070 Uiso 1 1 calc R U . . . 
C6 C 0.0785(4) 0.54056(19) 0.6685(4) 0.0534(11) Uani 1 1 d . . . . . 
H6A H 0.1510 0.5495 0.6456 0.064 Uiso 1 1 calc R U . . . 
N2 N -0.2601(4) 0.55312(18) 0.5686(3) 0.0690(12) Uani 1 1 d . . . . . 
C7 C -0.2701(6) 0.5832(3) 0.4639(4) 0.115(3) Uani 1 1 d . . . . . 
H7A H -0.2224 0.6172 0.4780 0.172 Uiso 1 1 calc R U . . . 
H7B H -0.3560 0.5921 0.4322 0.172 Uiso 1 1 calc R U . . . 
H7C H -0.2386 0.5602 0.4121 0.172 Uiso 1 1 calc R U . . . 
C8 C -0.3725(5) 0.5384(3) 0.6081(6) 0.097(2) Uani 1 1 d . . . . . 
H8A H -0.3684 0.5555 0.6801 0.146 Uiso 1 1 calc R U . . . 
H8B H -0.3775 0.4984 0.6148 0.146 Uiso 1 1 calc R U . . . 
H8C H -0.4451 0.5518 0.5551 0.146 Uiso 1 1 calc R U . . . 
N11 N 0.0820(3) 0.34747(13) 0.7818(3) 0.0425(8) Uani 1 1 d D . . . . 
H11 H 0.155(2) 0.3615(16) 0.820(3) 0.051 Uiso 1 1 d D U . . . 
C12 C 0.0748(4) 0.31298(17) 0.6944(3) 0.0454(10) Uani 1 1 d . . . . . 
H12A H 0.1481 0.3016 0.6757 0.055 Uiso 1 1 calc R U . . . 
C13 C -0.0363(4) 0.29378(16) 0.6315(3) 0.0429(9) Uani 1 1 d . . . . . 
H13A H -0.0376 0.2695 0.5716 0.051 Uiso 1 1 calc R U . . . 
C14 C -0.1490(4) 0.31087(15) 0.6575(3) 0.0367(8) Uani 1 1 d . . . . . 
C15 C -0.1382(4) 0.34799(16) 0.7496(3) 0.0405(9) Uani 1 1 d . . . . . 
H15A H -0.2095 0.3611 0.7698 0.049 Uiso 1 1 calc R U . . . 
C16 C -0.0228(4) 0.36455(15) 0.8090(3) 0.0413(9) Uani 1 1 d . . . . . 
H16A H -0.0171 0.3884 0.8703 0.050 Uiso 1 1 calc R U . . . 
N12 N -0.2604(3) 0.29175(14) 0.6002(3) 0.0442(8) Uani 1 1 d . . . . . 
C17 C -0.2725(4) 0.2533(2) 0.5055(4) 0.0580(12) Uani 1 1 d . . . . . 
H17A H -0.2091 0.2250 0.5234 0.087 Uiso 1 1 calc R U . . . 
H17B H -0.2630 0.2737 0.4401 0.087 Uiso 1 1 calc R U . . . 
H17C H -0.3532 0.2359 0.4905 0.087 Uiso 1 1 calc R U . . . 
C18 C -0.3765(4) 0.3129(2) 0.6227(4) 0.0570(12) Uani 1 1 d . . . . . 
H18A H -0.3670 0.3172 0.7025 0.086 Uiso 1 1 calc R U . . . 
H18B H -0.4427 0.2869 0.5941 0.086 Uiso 1 1 calc R U . . . 
H18C H -0.3961 0.3486 0.5865 0.086 Uiso 1 1 calc R U . . . 
N21 N 0.0862(3) 0.65975(12) 0.8116(3) 0.0356(7) Uani 1 1 d D . . . . 
H21 H 0.154(2) 0.6433(15) 0.847(3) 0.043 Uiso 1 1 d D U . . . 
C22 C -0.0185(3) 0.64316(14) 0.8394(3) 0.0342(8) Uani 1 1 d . . . . . 
H22A H -0.0130 0.6185 0.8993 0.041 Uiso 1 1 calc R U . . . 
C23 C -0.1332(3) 0.66130(14) 0.7828(3) 0.0339(8) Uani 1 1 d . . . . . 
H23A H -0.2044 0.6489 0.8040 0.041 Uiso 1 1 calc R U . . . 
C24 C -0.1438(3) 0.69917(13) 0.6914(3) 0.0320(8) Uani 1 1 d . . . . . 
C25 C -0.0303(3) 0.71597(15) 0.6652(3) 0.0370(8) Uani 1 1 d . . . . . 
H25A H -0.0312 0.7408 0.6063 0.044 Uiso 1 1 calc R U . . . 
C26 C 0.0801(4) 0.69568(15) 0.7265(3) 0.0398(9) Uani 1 1 d . . . . . 
H26A H 0.1538 0.7072 0.7085 0.048 Uiso 1 1 calc R U . . . 
N22 N -0.2551(3) 0.71869(13) 0.6338(2) 0.0387(7) Uani 1 1 d . . . . . 
C27 C -0.3712(4) 0.69917(18) 0.6572(4) 0.0489(10) Uani 1 1 d . . . . . 
H27A H -0.3590 0.6915 0.7362 0.073 Uiso 1 1 calc R U . . . 
H27B H -0.3975 0.6656 0.6151 0.073 Uiso 1 1 calc R U . . . 
H27C H -0.4340 0.7276 0.6358 0.073 Uiso 1 1 calc R U . . . 
C28 C -0.2665(4) 0.75631(18) 0.5377(3) 0.0527(11) Uani 1 1 d . . . . . 
H28A H -0.2068 0.7861 0.5567 0.079 Uiso 1 1 calc R U . . . 
H28B H -0.3491 0.7718 0.5185 0.079 Uiso 1 1 calc R U . . . 
H28C H -0.2510 0.7358 0.4746 0.079 Uiso 1 1 calc R U . . . 
O30 O 0.3102(8) 0.5926(5) 0.5578(6) 0.093(3) Uani 0.5 1 d D . P . . 
H30A H 0.347(12) 0.562(3) 0.563(13) 0.140 Uiso 0.5 1 d D U P . . 
H30B H 0.354(11) 0.615(4) 0.601(10) 0.140 Uiso 0.5 1 d D U P . . 
  
loop_ 
 _atom_site_aniso_label 
 _atom_site_aniso_U_11 
 _atom_site_aniso_U_22 
 _atom_site_aniso_U_33 
 _atom_site_aniso_U_23 
 _atom_site_aniso_U_13 
 _atom_site_aniso_U_12 
V1 0.0167(3) 0.0251(3) 0.0337(3) 0.0019(2) 0.0048(2) -0.0013(2) 
V2 0.0229(4) 0.0259(3) 0.0363(3) 0.0058(2) 0.0048(2) 0.0015(2) 
V3 0.0171(3) 0.0254(3) 0.0323(3) 0.0002(2) 0.0049(2) 0.0021(2) 
V4 0.0239(4) 0.0264(3) 0.0352(3) -0.0050(2) 0.0039(2) -0.0007(2) 
V5 0.0169(3) 0.0256(3) 0.0241(3) 0.00084(19) 0.0021(2) 0.0006(2) 
O1 0.0238(14) 0.0362(13) 0.0456(14) 0.0034(10) 0.0074(11) -0.0015(10) 
O2 0.0365(16) 0.0359(13) 0.0493(15) 0.0115(11) 0.0071(12) 0.0021(11) 
O3 0.0227(14) 0.0370(13) 0.0443(13) -0.0002(10) 0.0087(11) 0.0032(10) 
O4 0.0366(16) 0.0374(13) 0.0470(14) -0.0087(11) 0.0047(12) 0.0002(12) 
O5 0.0192(13) 0.0320(11) 0.0383(12) 0.0062(9) 0.0078(10) 0.0006(10) 
O6 0.0171(13) 0.0284(11) 0.0389(12) -0.0040(9) 0.0039(10) -0.0033(9) 
O7 0.0186(12) 0.0256(11) 0.0281(11) 0.0015(8) 0.0060(9) 0.0004(9) 
O8 0.0185(13) 0.0289(11) 0.0355(12) 0.0036(9) 0.0031(9) 0.0018(9) 
O9 0.0241(13) 0.0303(11) 0.0353(12) -0.0030(9) 0.0078(10) 0.0015(10) 
O10 0.0144(12) 0.0262(11) 0.0283(11) 0.0014(8) 0.0030(9) 0.0006(8) 
O11 0.0231(13) 0.0341(12) 0.0299(11) 0.0033(9) 0.0028(10) 0.0014(10) 
O12 0.0264(14) 0.0252(11) 0.0434(13) 0.0002(9) 0.0083(11) 0.0010(9) 
O13 0.0240(13) 0.0345(12) 0.0295(11) -0.0019(9) 0.0010(10) -0.0002(10) 
O14 0.0178(12) 0.0225(10) 0.0281(11) 0.0008(8) 0.0042(9) 0.0007(8) 
N1 0.033(2) 0.0489(18) 0.0443(18) -0.0043(15) -0.0055(15) 0.0038(16) 
C2 0.045(3) 0.037(2) 0.043(2) 0.0032(15) 0.0021(19) 0.0028(17) 
C3 0.034(2) 0.048(2) 0.056(2) -0.0009(19) 0.0000(19) 0.0004(18) 
C4 0.041(3) 0.050(2) 0.045(2) -0.0094(18) -0.0080(19) 0.0060(19) 
C5 0.071(3) 0.066(3) 0.0325(19) 0.0055(19) 0.003(2) 0.014(3) 
C6 0.042(3) 0.066(3) 0.054(2) -0.005(2) 0.015(2) -0.001(2) 
N2 0.056(3) 0.080(3) 0.056(2) -0.004(2) -0.017(2) 0.017(2) 
C7 0.122(6) 0.147(6) 0.050(3) -0.007(3) -0.033(3) 0.058(5) 
C8 0.036(3) 0.116(5) 0.125(5) -0.003(4) -0.012(3) 0.004(3) 
N11 0.0290(19) 0.0432(17) 0.0520(19) -0.0074(14) 0.0026(15) -0.0040(15) 
C12 0.029(2) 0.052(2) 0.057(2) -0.0111(19) 0.0119(18) -0.0018(18) 
C13 0.034(2) 0.050(2) 0.046(2) -0.0129(17) 0.0108(17) -0.0012(18) 
C14 0.033(2) 0.0389(18) 0.0376(18) -0.0029(15) 0.0064(16) -0.0002(16) 
C15 0.030(2) 0.043(2) 0.048(2) -0.0088(16) 0.0080(17) 0.0022(17) 
C16 0.038(2) 0.0370(19) 0.047(2) -0.0137(16) 0.0071(18) -0.0037(17) 
N12 0.0284(18) 0.0575(19) 0.0442(17) -0.0148(15) 0.0030(14) -0.0021(15) 
C17 0.042(3) 0.074(3) 0.053(2) -0.022(2) 0.000(2) -0.009(2) 
C18 0.027(2) 0.078(3) 0.061(3) -0.015(2) 0.0017(19) 0.001(2) 
N21 0.0256(18) 0.0340(15) 0.0440(16) 0.0029(12) 0.0015(13) 0.0042(13) 
C22 0.034(2) 0.0304(16) 0.0369(17) 0.0066(14) 0.0048(15) 0.0001(16) 
C23 0.023(2) 0.0370(18) 0.0414(19) 0.0086(15) 0.0058(15) -0.0007(15) 
C24 0.031(2) 0.0296(16) 0.0347(17) 0.0026(13) 0.0055(15) 0.0003(15) 
C25 0.034(2) 0.0368(18) 0.0403(19) 0.0098(15) 0.0085(16) 0.0013(16) 
C26 0.030(2) 0.0394(19) 0.051(2) 0.0056(16) 0.0117(17) -0.0009(16) 
N22 0.0268(18) 0.0449(17) 0.0420(16) 0.0137(13) 0.0031(13) 0.0023(14) 
C27 0.025(2) 0.057(2) 0.061(2) 0.011(2) 0.0026(18) 0.0027(19) 
C28 0.047(3) 0.055(2) 0.052(2) 0.0201(19) 0.003(2) 0.009(2) 
O30 0.076(6) 0.146(8) 0.053(4) 0.041(5) 0.006(4) 0.000(6) 
  
_geom_special_details ?
  
loop_ 
 _geom_bond_atom_site_label_1 
 _geom_bond_atom_site_label_2 
 _geom_bond_distance 
 _geom_bond_site_symmetry_2 
 _geom_bond_publ_flag 
V1 O1 1.613(3) . ? 
V1 O5 1.796(2) . ? 
V1 O6 1.858(2) . ? 
V1 O7 1.982(2) . ? 
V1 O10 2.031(2) 3_667 ? 
V1 O14 2.235(2) . ? 
V1 V3 3.0886(9) 3_667 ? 
V1 V2 3.1019(8) . ? 
V2 O2 1.608(2) . ? 
V2 O12 1.844(2) . ? 
V2 O8 1.863(2) . ? 
V2 O5 1.897(2) . ? 
V2 O11 2.059(2) . ? 
V2 O14 2.315(2) . ? 
V2 V4 3.0732(8) . ? 
V2 V5 3.0798(9) . ? 
V3 O3 1.613(3) . ? 
V3 O9 1.792(2) . ? 
V3 O8 1.858(2) . ? 
V3 O7 1.974(2) 3_667 ? 
V3 O10 2.046(2) . ? 
V3 O14 2.239(2) . ? 
V3 V1 3.0886(9) 3_667 ? 
V3 V4 3.0995(8) . ? 
V4 O4 1.606(2) . ? 
V4 O12 1.839(2) . ? 
V4 O6 1.863(2) . ? 
V4 O9 1.899(2) . ? 
V4 O13 2.051(2) . ? 
V4 O14 2.328(2) . ? 
V4 V5 3.0884(9) 3_667 ? 
V5 O13 1.682(2) 3_667 ? 
V5 O11 1.694(2) . ? 
V5 O7 1.922(2) . ? 
V5 O10 1.933(2) . ? 
V5 O14 2.122(2) . ? 
V5 O14 2.123(2) 3_667 ? 
V5 V4 3.0884(9) 3_667 ? 
O7 V3 1.974(2) 3_667 ? 
O10 V1 2.031(2) 3_667 ? 
O13 V5 1.682(2) 3_667 ? 
O14 V5 2.123(2) 3_667 ? 
N1 C6 1.337(5) . ? 
N1 C2 1.340(6) . ? 
N1 H1 0.896(19) . ? 
C2 C3 1.354(6) . ? 
C2 H2A 0.9300 . ? 
C3 C4 1.391(6) . ? 
C3 H3A 0.9300 . ? 
C4 N2 1.359(5) . ? 
C4 C5 1.405(6) . ? 
C5 C6 1.369(6) . ? 
C5 H5A 0.9300 . ? 
C6 H6A 0.9300 . ? 
N2 C7 1.448(7) . ? 
N2 C8 1.472(7) . ? 
C7 H7A 0.9600 . ? 
C7 H7B 0.9600 . ? 
C7 H7C 0.9600 . ? 
C8 H8A 0.9600 . ? 
C8 H8B 0.9600 . ? 
C8 H8C 0.9600 . ? 
N11 C12 1.335(5) . ? 
N11 C16 1.338(5) . ? 
N11 H11 0.894(19) . ? 
C12 C13 1.365(5) . ? 
C12 H12A 0.9300 . ? 
C13 C14 1.412(5) . ? 
C13 H13A 0.9300 . ? 
C14 N12 1.345(5) . ? 
C14 C15 1.415(5) . ? 
C15 C16 1.369(5) . ? 
C15 H15A 0.9300 . ? 
C16 H16A 0.9300 . ? 
N12 C17 1.458(5) . ? 
N12 C18 1.459(5) . ? 
C17 H17A 0.9600 . ? 
C17 H17B 0.9600 . ? 
C17 H17C 0.9600 . ? 
C18 H18A 0.9600 . ? 
C18 H18B 0.9600 . ? 
C18 H18C 0.9600 . ? 
N21 C22 1.336(5) . ? 
N21 C26 1.336(5) . ? 
N21 H21 0.870(19) . ? 
C22 C23 1.364(5) . ? 
C22 H22A 0.9300 . ? 
C23 C24 1.419(4) . ? 
C23 H23A 0.9300 . ? 
C24 N22 1.348(4) . ? 
C24 C25 1.419(5) . ? 
C25 C26 1.361(5) . ? 
C25 H25A 0.9300 . ? 
C26 H26A 0.9300 . ? 
N22 C27 1.451(5) . ? 
N22 C28 1.459(4) . ? 
C27 H27A 0.9600 . ? 
C27 H27B 0.9600 . ? 
C27 H27C 0.9600 . ? 
C28 H28A 0.9600 . ? 
C28 H28B 0.9600 . ? 
C28 H28C 0.9600 . ? 
O30 H30A 0.83(2) . ? 
O30 H30B 0.83(2) . ? 
  
loop_ 
 _geom_angle_atom_site_label_1 
 _geom_angle_atom_site_label_2 
 _geom_angle_atom_site_label_3 
 _geom_angle 
 _geom_angle_site_symmetry_1 
 _geom_angle_site_symmetry_3 
 _geom_angle_publ_flag 
O1 V1 O5 104.78(11) . . ? 
O1 V1 O6 99.49(11) . . ? 
O5 V1 O6 95.07(10) . . ? 
O1 V1 O7 101.88(11) . . ? 
O5 V1 O7 91.80(10) . . ? 
O6 V1 O7 155.06(10) . . ? 
O1 V1 O10 98.32(11) . 3_667 ? 
O5 V1 O10 155.73(10) . 3_667 ? 
O6 V1 O10 88.29(9) . 3_667 ? 
O7 V1 O10 76.06(9) . 3_667 ? 
O1 V1 O14 173.61(10) . . ? 
O5 V1 O14 81.58(9) . . ? 
O6 V1 O14 80.37(9) . . ? 
O7 V1 O14 76.96(9) . . ? 
O10 V1 O14 75.29(9) 3_667 . ? 
O1 V1 V3 90.38(8) . 3_667 ? 
O5 V1 V3 130.36(8) . 3_667 ? 
O6 V1 V3 129.22(7) . 3_667 ? 
O7 V1 V3 38.57(6) . 3_667 ? 
O10 V1 V3 40.93(6) 3_667 3_667 ? 
O14 V1 V3 84.85(6) . 3_667 ? 
O1 V1 V2 138.29(9) . . ? 
O5 V1 V2 33.88(7) . . ? 
O6 V1 V2 84.15(7) . . ? 
O7 V1 V2 88.38(7) . . ? 
O10 V1 V2 123.37(7) 3_667 . ? 
O14 V1 V2 48.10(5) . . ? 
V3 V1 V2 119.40(2) 3_667 . ? 
O2 V2 O12 104.60(12) . . ? 
O2 V2 O8 100.53(12) . . ? 
O12 V2 O8 91.77(10) . . ? 
O2 V2 O5 103.44(12) . . ? 
O12 V2 O5 90.64(10) . . ? 
O8 V2 O5 154.46(10) . . ? 
O2 V2 O11 98.64(11) . . ? 
O12 V2 O11 156.76(10) . . ? 
O8 V2 O11 84.39(10) . . ? 
O5 V2 O11 83.44(10) . . ? 
O2 V2 O14 173.17(11) . . ? 
O12 V2 O14 82.12(9) . . ? 
O8 V2 O14 77.74(8) . . ? 
O5 V2 O14 77.42(8) . . ? 
O11 V2 O14 74.66(8) . . ? 
O2 V2 V4 137.98(10) . . ? 
O12 V2 V4 33.39(7) . . ? 
O8 V2 V4 84.55(7) . . ? 
O5 V2 V4 83.56(7) . . ? 
O11 V2 V4 123.38(6) . . ? 
O14 V2 V4 48.73(5) . . ? 
O2 V2 V5 129.78(10) . . ? 
O12 V2 V5 125.62(7) . . ? 
O8 V2 V5 79.38(7) . . ? 
O5 V2 V5 78.59(7) . . ? 
O11 V2 V5 31.15(6) . . ? 
O14 V2 V5 43.51(5) . . ? 
V4 V2 V5 92.232(19) . . ? 
O2 V2 V1 135.28(10) . . ? 
O12 V2 V1 82.23(7) . . ? 
O8 V2 V1 123.68(7) . . ? 
O5 V2 V1 31.85(7) . . ? 
O11 V2 V1 80.94(7) . . ? 
O14 V2 V1 45.94(5) . . ? 
V4 V2 V1 60.746(18) . . ? 
V5 V2 V1 60.986(17) . . ? 
O3 V3 O9 104.53(12) . . ? 
O3 V3 O8 99.95(11) . . ? 
O9 V3 O8 94.89(10) . . ? 
O3 V3 O7 101.57(11) . 3_667 ? 
O9 V3 O7 92.71(9) . 3_667 ? 
O8 V3 O7 154.55(10) . 3_667 ? 
O3 V3 O10 98.46(11) . . ? 
O9 V3 O10 156.02(10) . . ? 
O8 V3 O10 87.68(9) . . ? 
O7 V3 O10 75.89(9) 3_667 . ? 
O3 V3 O14 173.39(10) . . ? 
O9 V3 O14 82.06(9) . . ? 
O8 V3 O14 79.81(9) . . ? 
O7 V3 O14 77.24(9) 3_667 . ? 
O10 V3 O14 74.93(8) . . ? 
O3 V3 V1 90.27(8) . 3_667 ? 
O9 V3 V1 131.46(7) . 3_667 ? 
O8 V3 V1 128.24(7) . 3_667 ? 
O7 V3 V1 38.76(6) 3_667 3_667 ? 
O10 V3 V1 40.56(6) . 3_667 ? 
O14 V3 V1 84.79(6) . 3_667 ? 
O3 V3 V4 138.15(9) . . ? 
O9 V3 V4 33.96(7) . . ? 
O8 V3 V4 83.86(7) . . ? 
O7 V3 V4 89.08(7) 3_667 . ? 
O10 V3 V4 123.39(7) . . ? 
O14 V3 V4 48.47(5) . . ? 
V1 V3 V4 120.06(2) 3_667 . ? 
O4 V4 O12 104.95(12) . . ? 
O4 V4 O6 100.60(12) . . ? 
O12 V4 O6 92.18(10) . . ? 
O4 V4 O9 103.06(12) . . ? 
O12 V4 O9 90.86(10) . . ? 
O6 V4 O9 154.49(10) . . ? 
O4 V4 O13 99.31(11) . . ? 
O12 V4 O13 155.71(10) . . ? 
O6 V4 O13 84.20(10) . . ? 
O9 V4 O13 82.69(10) . . ? 
O4 V4 O14 173.10(11) . . ? 
O12 V4 O14 81.86(8) . . ? 
O6 V4 O14 77.82(8) . . ? 
O9 V4 O14 77.56(8) . . ? 
O13 V4 O14 73.89(8) . . ? 
O4 V4 V2 138.45(9) . . ? 
O12 V4 V2 33.50(7) . . ? 
O6 V4 V2 84.92(7) . . ? 
O9 V4 V2 83.73(7) . . ? 
O13 V4 V2 122.24(6) . . ? 
O14 V4 V2 48.36(5) . . ? 
O4 V4 V5 129.80(9) . 3_667 ? 
O12 V4 V5 125.25(7) . 3_667 ? 
O6 V4 V5 79.15(7) . 3_667 ? 
O9 V4 V5 78.44(7) . 3_667 ? 
O13 V4 V5 30.50(6) . 3_667 ? 
O14 V4 V5 43.40(5) . 3_667 ? 
V2 V4 V5 91.754(19) . 3_667 ? 
O4 V4 V3 134.88(10) . . ? 
O12 V4 V3 82.41(7) . . ? 
O6 V4 V3 123.88(7) . . ? 
O9 V4 V3 31.83(7) . . ? 
O13 V4 V3 79.81(7) . . ? 
O14 V4 V3 46.07(5) . . ? 
V2 V4 V3 60.873(18) . . ? 
V5 V4 V3 60.682(17) 3_667 . ? 
O13 V5 O11 106.83(12) 3_667 . ? 
O13 V5 O7 97.23(10) 3_667 . ? 
O11 V5 O7 97.59(10) . . ? 
O13 V5 O10 97.26(10) 3_667 . ? 
O11 V5 O10 96.91(10) . . ? 
O7 V5 O10 155.55(10) . . ? 
O13 V5 O14 165.55(9) 3_667 . ? 
O11 V5 O14 87.61(9) . . ? 
O7 V5 O14 81.03(8) . . ? 
O10 V5 O14 80.03(8) . . ? 
O13 V5 O14 87.09(10) 3_667 3_667 ? 
O11 V5 O14 166.04(10) . 3_667 ? 
O7 V5 O14 81.23(8) . 3_667 ? 
O10 V5 O14 79.95(8) . 3_667 ? 
O14 V5 O14 78.46(9) . 3_667 ? 
O13 V5 V2 145.76(8) 3_667 . ? 
O11 V5 V2 38.94(8) . . ? 
O7 V5 V2 90.11(6) . . ? 
O10 V5 V2 88.90(6) . . ? 
O14 V5 V2 48.68(6) . . ? 
O14 V5 V2 127.13(6) 3_667 . ? 
O13 V5 V4 38.24(8) 3_667 3_667 ? 
O11 V5 V4 145.05(8) . 3_667 ? 
O7 V5 V4 90.36(6) . 3_667 ? 
O10 V5 V4 88.93(6) . 3_667 ? 
O14 V5 V4 127.31(6) . 3_667 ? 
O14 V5 V4 48.86(6) 3_667 3_667 ? 
V2 V5 V4 175.78(2) . 3_667 ? 
V1 O5 V2 114.28(12) . . ? 
V1 O6 V4 114.10(11) . . ? 
V5 O7 V3 106.73(10) . 3_667 ? 
V5 O7 V1 106.94(10) . . ? 
V3 O7 V1 102.68(10) 3_667 . ? 
V3 O8 V2 114.36(11) . . ? 
V3 O9 V4 114.21(12) . . ? 
V5 O10 V1 107.76(10) . 3_667 ? 
V5 O10 V3 107.81(10) . . ? 
V1 O10 V3 98.51(9) 3_667 . ? 
V5 O11 V2 109.91(11) . . ? 
V4 O12 V2 113.11(12) . . ? 
V5 O13 V4 111.26(11) 3_667 . ? 
V5 O14 V5 101.54(9) . 3_667 ? 
V5 O14 V1 92.08(8) . . ? 
V5 O14 V1 94.55(8) 3_667 . ? 
V5 O14 V3 94.98(8) . . ? 
V5 O14 V3 91.49(8) 3_667 . ? 
V1 O14 V3 169.63(11) . . ? 
V5 O14 V2 87.82(7) . . ? 
V5 O14 V2 170.60(10) 3_667 . ? 
V1 O14 V2 85.96(7) . . ? 
V3 O14 V2 86.72(7) . . ? 
V5 O14 V4 170.68(10) . . ? 
V5 O14 V4 87.75(7) 3_667 . ? 
V1 O14 V4 86.35(7) . . ? 
V3 O14 V4 85.46(7) . . ? 
V2 O14 V4 82.91(7) . . ? 
C6 N1 C2 119.6(4) . . ? 
C6 N1 H1 123(3) . . ? 
C2 N1 H1 117(3) . . ? 
N1 C2 C3 122.3(4) . . ? 
N1 C2 H2A 118.9 . . ? 
C3 C2 H2A 118.9 . . ? 
C2 C3 C4 120.1(4) . . ? 
C2 C3 H3A 120.0 . . ? 
C4 C3 H3A 120.0 . . ? 
N2 C4 C3 121.0(5) . . ? 
N2 C4 C5 122.3(4) . . ? 
C3 C4 C5 116.6(4) . . ? 
C6 C5 C4 120.5(4) . . ? 
C6 C5 H5A 119.8 . . ? 
C4 C5 H5A 119.8 . . ? 
N1 C6 C5 120.9(4) . . ? 
N1 C6 H6A 119.6 . . ? 
C5 C6 H6A 119.6 . . ? 
C4 N2 C7 119.7(5) . . ? 
C4 N2 C8 119.7(4) . . ? 
C7 N2 C8 120.6(5) . . ? 
N2 C7 H7A 109.5 . . ? 
N2 C7 H7B 109.5 . . ? 
H7A C7 H7B 109.5 . . ? 
N2 C7 H7C 109.5 . . ? 
H7A C7 H7C 109.5 . . ? 
H7B C7 H7C 109.5 . . ? 
N2 C8 H8A 109.5 . . ? 
N2 C8 H8B 109.5 . . ? 
H8A C8 H8B 109.5 . . ? 
N2 C8 H8C 109.5 . . ? 
H8A C8 H8C 109.5 . . ? 
H8B C8 H8C 109.5 . . ? 
C12 N11 C16 119.4(3) . . ? 
C12 N11 H11 122(3) . . ? 
C16 N11 H11 119(3) . . ? 
N11 C12 C13 122.5(4) . . ? 
N11 C12 H12A 118.8 . . ? 
C13 C12 H12A 118.8 . . ? 
C12 C13 C14 119.8(3) . . ? 
C12 C13 H13A 120.1 . . ? 
C14 C13 H13A 120.1 . . ? 
N12 C14 C13 122.1(3) . . ? 
N12 C14 C15 121.6(4) . . ? 
C13 C14 C15 116.3(3) . . ? 
C16 C15 C14 119.9(4) . . ? 
C16 C15 H15A 120.0 . . ? 
C14 C15 H15A 120.0 . . ? 
N11 C16 C15 122.0(3) . . ? 
N11 C16 H16A 119.0 . . ? 
C15 C16 H16A 119.0 . . ? 
C14 N12 C17 122.0(3) . . ? 
C14 N12 C18 121.3(3) . . ? 
C17 N12 C18 116.4(3) . . ? 
N12 C17 H17A 109.5 . . ? 
N12 C17 H17B 109.5 . . ? 
H17A C17 H17B 109.5 . . ? 
N12 C17 H17C 109.5 . . ? 
H17A C17 H17C 109.5 . . ? 
H17B C17 H17C 109.5 . . ? 
N12 C18 H18A 109.5 . . ? 
N12 C18 H18B 109.5 . . ? 
H18A C18 H18B 109.5 . . ? 
N12 C18 H18C 109.5 . . ? 
H18A C18 H18C 109.5 . . ? 
H18B C18 H18C 109.5 . . ? 
C22 N21 C26 119.8(3) . . ? 
C22 N21 H21 116(3) . . ? 
C26 N21 H21 124(3) . . ? 
N21 C22 C23 122.1(3) . . ? 
N21 C22 H22A 119.0 . . ? 
C23 C22 H22A 119.0 . . ? 
C22 C23 C24 119.9(3) . . ? 
C22 C23 H23A 120.0 . . ? 
C24 C23 H23A 120.0 . . ? 
N22 C24 C25 121.9(3) . . ? 
N22 C24 C23 121.9(3) . . ? 
C25 C24 C23 116.1(3) . . ? 
C26 C25 C24 119.9(3) . . ? 
C26 C25 H25A 120.0 . . ? 
C24 C25 H25A 120.0 . . ? 
N21 C26 C25 122.2(4) . . ? 
N21 C26 H26A 118.9 . . ? 
C25 C26 H26A 118.9 . . ? 
C24 N22 C27 121.7(3) . . ? 
C24 N22 C28 122.0(3) . . ? 
C27 N22 C28 116.0(3) . . ? 
N22 C27 H27A 109.5 . . ? 
N22 C27 H27B 109.5 . . ? 
H27A C27 H27B 109.5 . . ? 
N22 C27 H27C 109.5 . . ? 
H27A C27 H27C 109.5 . . ? 
H27B C27 H27C 109.5 . . ? 
N22 C28 H28A 109.5 . . ? 
N22 C28 H28B 109.5 . . ? 
H28A C28 H28B 109.5 . . ? 
N22 C28 H28C 109.5 . . ? 
H28A C28 H28C 109.5 . . ? 
H28B C28 H28C 109.5 . . ? 
H30A O30 H30B 109(5) . . ? 
  
loop_ 
 _geom_torsion_atom_site_label_1 
 _geom_torsion_atom_site_label_2 
 _geom_torsion_atom_site_label_3 
 _geom_torsion_atom_site_label_4 
 _geom_torsion 
 _geom_torsion_site_symmetry_1 
 _geom_torsion_site_symmetry_2 
 _geom_torsion_site_symmetry_3 
 _geom_torsion_site_symmetry_4 
 _geom_torsion_publ_flag 
O1 V1 O5 V2 -172.83(12) . . . . ? 
O6 V1 O5 V2 -71.60(13) . . . . ? 
O7 V1 O5 V2 84.39(13) . . . . ? 
O10 V1 O5 V2 25.5(3) 3_667 . . . ? 
O14 V1 O5 V2 7.86(12) . . . . ? 
V3 V1 O5 V2 83.69(14) 3_667 . . . ? 
O2 V2 O5 V1 179.26(13) . . . . ? 
O12 V2 O5 V1 74.09(13) . . . . ? 
O8 V2 O5 V1 -21.4(3) . . . . ? 
O11 V2 O5 V1 -83.38(13) . . . . ? 
O14 V2 O5 V1 -7.69(11) . . . . ? 
V4 V2 O5 V1 41.39(11) . . . . ? 
V5 V2 O5 V1 -52.21(10) . . . . ? 
O1 V1 O6 V4 176.03(12) . . . . ? 
O5 V1 O6 V4 70.10(13) . . . . ? 
O7 V1 O6 V4 -35.3(3) . . . . ? 
O10 V1 O6 V4 -85.82(12) 3_667 . . . ? 
O14 V1 O6 V4 -10.45(11) . . . . ? 
V3 V1 O6 V4 -85.63(13) 3_667 . . . ? 
V2 V1 O6 V4 37.98(10) . . . . ? 
O4 V4 O6 V1 -176.73(13) . . . . ? 
O12 V4 O6 V1 -71.07(13) . . . . ? 
O9 V4 O6 V1 25.5(3) . . . . ? 
O13 V4 O6 V1 84.85(12) . . . . ? 
O14 V4 O6 V1 10.12(11) . . . . ? 
V2 V4 O6 V1 -38.34(10) . . . . ? 
V5 V4 O6 V1 54.43(10) 3_667 . . . ? 
V3 V4 O6 V1 11.25(15) . . . . ? 
O3 V3 O8 V2 176.25(12) . . . . ? 
O9 V3 O8 V2 70.55(13) . . . . ? 
O7 V3 O8 V2 -36.3(3) 3_667 . . . ? 
O10 V3 O8 V2 -85.56(12) . . . . ? 
O14 V3 O8 V2 -10.46(11) . . . . ? 
V1 V3 O8 V2 -85.44(12) 3_667 . . . ? 
V4 V3 O8 V2 38.38(10) . . . . ? 
O2 V2 O8 V3 -176.55(13) . . . . ? 
O12 V2 O8 V3 -71.35(13) . . . . ? 
O5 V2 O8 V3 23.8(3) . . . . ? 
O11 V2 O8 V3 85.67(12) . . . . ? 
O14 V2 O8 V3 10.19(11) . . . . ? 
V4 V2 O8 V3 -38.71(10) . . . . ? 
V5 V2 O8 V3 54.60(10) . . . . ? 
V1 V2 O8 V3 10.49(15) . . . . ? 
O3 V3 O9 V4 -173.01(12) . . . . ? 
O8 V3 O9 V4 -71.39(13) . . . . ? 
O7 V3 O9 V4 84.30(13) 3_667 . . . ? 
O10 V3 O9 V4 23.9(3) . . . . ? 
O14 V3 O9 V4 7.59(11) . . . . ? 
V1 V3 O9 V4 83.37(13) 3_667 . . . ? 
O4 V4 O9 V3 179.64(13) . . . . ? 
O12 V4 O9 V3 74.07(13) . . . . ? 
O6 V4 O9 V3 -22.8(3) . . . . ? 
O13 V4 O9 V3 -82.45(12) . . . . ? 
O14 V4 O9 V3 -7.41(11) . . . . ? 
V2 V4 O9 V3 41.28(10) . . . . ? 
V5 V4 O9 V3 -51.81(10) 3_667 . . . ? 
O13 V5 O11 V2 179.35(10) 3_667 . . . ? 
O7 V5 O11 V2 -80.69(12) . . . . ? 
O10 V5 O11 V2 79.58(12) . . . . ? 
O14 V5 O11 V2 -0.07(11) . . . . ? 
O14 V5 O11 V2 3.5(5) 3_667 . . . ? 
V4 V5 O11 V2 177.67(5) 3_667 . . . ? 
O4 V4 O12 V2 178.98(13) . . . . ? 
O6 V4 O12 V2 77.40(12) . . . . ? 
O9 V4 O12 V2 -77.26(12) . . . . ? 
O13 V4 O12 V2 -3.3(3) . . . . ? 
O14 V4 O12 V2 0.04(11) . . . . ? 
V5 V4 O12 V2 -0.85(16) 3_667 . . . ? 
V3 V4 O12 V2 -46.49(10) . . . . ? 
O2 V2 O12 V4 178.69(13) . . . . ? 
O8 V2 O12 V4 77.33(12) . . . . ? 
O5 V2 O12 V4 -77.24(12) . . . . ? 
O11 V2 O12 V4 -2.5(3) . . . . ? 
O14 V2 O12 V4 -0.04(11) . . . . ? 
V5 V2 O12 V4 -0.86(16) . . . . ? 
V1 V2 O12 V4 -46.44(10) . . . . ? 
C6 N1 C2 C3 1.7(6) . . . . ? 
N1 C2 C3 C4 -2.4(6) . . . . ? 
C2 C3 C4 N2 -175.8(4) . . . . ? 
C2 C3 C4 C5 2.0(6) . . . . ? 
N2 C4 C5 C6 176.6(4) . . . . ? 
C3 C4 C5 C6 -1.1(6) . . . . ? 
C2 N1 C6 C5 -0.8(6) . . . . ? 
C4 C5 C6 N1 0.5(7) . . . . ? 
C3 C4 N2 C7 175.7(5) . . . . ? 
C5 C4 N2 C7 -2.0(7) . . . . ? 
C3 C4 N2 C8 -2.6(7) . . . . ? 
C5 C4 N2 C8 179.8(5) . . . . ? 
C16 N11 C12 C13 -0.5(6) . . . . ? 
N11 C12 C13 C14 0.6(6) . . . . ? 
C12 C13 C14 N12 -177.9(4) . . . . ? 
C12 C13 C14 C15 0.2(6) . . . . ? 
N12 C14 C15 C16 177.1(4) . . . . ? 
C13 C14 C15 C16 -1.1(5) . . . . ? 
C12 N11 C16 C15 -0.4(6) . . . . ? 
C14 C15 C16 N11 1.2(6) . . . . ? 
C13 C14 N12 C17 -1.7(6) . . . . ? 
C15 C14 N12 C17 -179.7(4) . . . . ? 
C13 C14 N12 C18 -175.5(4) . . . . ? 
C15 C14 N12 C18 6.5(6) . . . . ? 
C26 N21 C22 C23 0.7(5) . . . . ? 
N21 C22 C23 C24 -0.2(5) . . . . ? 
C22 C23 C24 N22 -179.2(3) . . . . ? 
C22 C23 C24 C25 -0.2(5) . . . . ? 
N22 C24 C25 C26 179.2(3) . . . . ? 
C23 C24 C25 C26 0.2(5) . . . . ? 
C22 N21 C26 C25 -0.7(5) . . . . ? 
C24 C25 C26 N21 0.3(6) . . . . ? 
C25 C24 N22 C27 176.8(3) . . . . ? 
C23 C24 N22 C27 -4.2(5) . . . . ? 
C25 C24 N22 C28 2.9(5) . . . . ? 
C23 C24 N22 C28 -178.1(3) . . . . ? 
  
loop_ 
 _geom_hbond_atom_site_label_D 
 _geom_hbond_atom_site_label_H 
 _geom_hbond_atom_site_label_A 
 _geom_hbond_distance_DH 
 _geom_hbond_distance_HA 
 _geom_hbond_distance_DA 
 _geom_hbond_angle_DHA 
 _geom_hbond_site_symmetry_A
 _geom_hbond_publ_flag
N1  H1  O10  0.896(19) 1.71(2)   2.603(4) 174(4) .     ?
N11 H11 O6   0.894(19) 1.721(19) 2.615(4) 179(4) 3_667 ?
N21 H21 O8   0.870(19) 1.754(19) 2.622(4) 175(4) .     ? 
  
_refine_diff_density_max    0.642 
_refine_diff_density_min   -0.450 
_refine_diff_density_rms    0.078 
  
_shelx_res_file 
; 
  
    V10DMAP6_2_Cu.res created by SHELXL-2014/7 
  
  
TITL V10DMAP6_2_Cu in P2(1)/n 
CELL 1.54184 11.0212 23.8454 12.20887 90 103.3414 90 
ZERR       2  0.0002   0.004  0.00019  0   0.0017  0 
LATT  1 
SYMM 0.5-X, 0.5+Y, 0.5-Z 
SFAC C H N O V 
UNIT 84 136 24 58 20 
  
TEMP 20 
SIZE 0.7571 0.1731 0.1267 
  
ACTA 
L.S. 20 
  
BOND $H 
CONF 
  
EQIV $1 -x+1, -y+1, -z+2 
  
HTAB N1 O10 
HTAB N11 O6_$1 
HTAB N21 O8 
  
FMAP 2 
PLAN 20 
  
DFIX 0.85 0.02 O30 H30A O30 H30B 
DFIX 1.34 0.04 H30A H30B 
DFIX 0.90 0.02 N1 H1 N11 H11 N21 H21 
  
WGHT    0.066400    3.042500 
FVAR       2.22240 
V1    5    0.695337    0.565271    0.980874    11.00000    0.01669    0.02507 = 
         0.03366    0.00189    0.00476   -0.00131 
V2    5    0.452423    0.631553    0.882662    11.00000    0.02292    0.02593 = 
         0.03632    0.00579    0.00481    0.00149 
V3    5    0.307794    0.564103    1.031731    11.00000    0.01706    0.02536 = 
         0.03225    0.00015    0.00490    0.00209 
V4    5    0.552815    0.626719    1.139151    11.00000    0.02394    0.02641 = 
         0.03518   -0.00497    0.00386   -0.00067 
V5    5    0.449567    0.502796    0.862430    11.00000    0.01693    0.02562 = 
         0.02413    0.00084    0.00210    0.00063 
O1    4    0.839527    0.565929    0.973236    11.00000    0.02384    0.03616 = 
         0.04558    0.00341    0.00740   -0.00151 
O2    4    0.411068    0.678520    0.786757    11.00000    0.03647    0.03586 = 
         0.04929    0.01150    0.00709    0.00209 
O3    4    0.164023    0.564190    1.040477    11.00000    0.02270    0.03696 = 
         0.04426   -0.00022    0.00866    0.00319 
O4    4    0.595257    0.669463    1.242565    11.00000    0.03659    0.03735 = 
         0.04704   -0.00873    0.00474    0.00019 
O5    4    0.620676    0.616526    0.879846    11.00000    0.01923    0.03197 = 
         0.03827    0.00616    0.00780    0.00056 
O6    4    0.705807    0.611593    1.105102    11.00000    0.01710    0.02843 = 
         0.03890   -0.00404    0.00391   -0.00327 
O7    4    0.627122    0.502684    0.878239    11.00000    0.01862    0.02558 = 
         0.02814    0.00147    0.00597    0.00036 
O8    4    0.299282    0.615218    0.915304    11.00000    0.01849    0.02887 = 
         0.03548    0.00359    0.00308    0.00178 
O9    4    0.384051    0.611311    1.140127    11.00000    0.02413    0.03030 = 
         0.03526   -0.00295    0.00781    0.00154 
O10   4    0.297006    0.501670    0.914923    11.00000    0.01442    0.02622 = 
         0.02826    0.00136    0.00303    0.00057 
O11   4    0.417322    0.561320    0.782273    11.00000    0.02308    0.03406 = 
         0.02992    0.00327    0.00282    0.00141 
O12   4    0.503452    0.671664    1.014411    11.00000    0.02644    0.02524 = 
         0.04344    0.00015    0.00828    0.00097 
O13   4    0.583072    0.552306    1.225451    11.00000    0.02398    0.03449 = 
         0.02952   -0.00190    0.00103   -0.00018 
O14   4    0.501180    0.556253    1.004517    11.00000    0.01778    0.02252 = 
         0.02814    0.00081    0.00421    0.00075 
N1    3    0.086542    0.516410    0.768787    11.00000    0.03299    0.04887 = 
         0.04435   -0.00431   -0.00550    0.00384 
H1    2    0.159346    0.508995    0.816880    11.00000   -1.20000 
C2    1   -0.017867    0.504139    0.802388    11.00000    0.04457    0.03681 = 
         0.04296    0.00323    0.00212    0.00284 
AFIX  43 
H2A   2   -0.011111    0.488292    0.873145    11.00000   -1.20000 
AFIX   0 
C3    1   -0.132842    0.514014    0.736890    11.00000    0.03412    0.04805 = 
         0.05603   -0.00087    0.00001    0.00039 
AFIX  43 
H3A   2   -0.203302    0.503672    0.761764    11.00000   -1.20000 
AFIX   0 
C4    1   -0.145739    0.539601    0.632465    11.00000    0.04080    0.05047 = 
         0.04495   -0.00941   -0.00800    0.00597 
C5    1   -0.035045    0.552313    0.599119    11.00000    0.07143    0.06644 = 
         0.03248    0.00552    0.00270    0.01390 
AFIX  43 
H5A   2   -0.038981    0.568835    0.529385    11.00000   -1.20000 
AFIX   0 
C6    1    0.078504    0.540556    0.668519    11.00000    0.04211    0.06592 = 
         0.05417   -0.00495    0.01504   -0.00108 
AFIX  43 
H6A   2    0.151012    0.549478    0.645639    11.00000   -1.20000 
AFIX   0 
N2    3   -0.260088    0.553117    0.568621    11.00000    0.05600    0.08016 = 
         0.05627   -0.00441   -0.01683    0.01683 
C7    1   -0.270125    0.583207    0.463910    11.00000    0.12190    0.14708 = 
         0.04969   -0.00745   -0.03310    0.05822 
AFIX 137 
H7A   2   -0.222409    0.617205    0.477990    11.00000   -1.50000 
H7B   2   -0.355988    0.592131    0.432197    11.00000   -1.50000 
H7C   2   -0.238634    0.560239    0.412114    11.00000   -1.50000 
AFIX   0 
C8    1   -0.372538    0.538440    0.608074    11.00000    0.03563    0.11603 = 
         0.12458   -0.00267   -0.01249    0.00389 
AFIX 137 
H8A   2   -0.368363    0.555459    0.680109    11.00000   -1.50000 
H8B   2   -0.377521    0.498440    0.614793    11.00000   -1.50000 
H8C   2   -0.445082    0.551847    0.555055    11.00000   -1.50000 
AFIX   0 
N11   3    0.082032    0.347469    0.781764    11.00000    0.02903    0.04318 = 
         0.05199   -0.00742    0.00257   -0.00397 
H11   2    0.154824    0.361457    0.819788    11.00000   -1.20000 
C12   1    0.074782    0.312977    0.694405    11.00000    0.02883    0.05153 = 
         0.05690   -0.01106    0.01192   -0.00182 
AFIX  43 
H12A  2    0.148144    0.301588    0.675695    11.00000   -1.20000 
AFIX   0 
C13   1   -0.036251    0.293782    0.631478    11.00000    0.03382    0.04965 = 
         0.04601   -0.01285    0.01083   -0.00121 
AFIX  43 
H13A  2   -0.037632    0.269500    0.571594    11.00000   -1.20000 
AFIX   0 
C14   1   -0.148965    0.310872    0.657506    11.00000    0.03288    0.03885 = 
         0.03762   -0.00290    0.00641   -0.00020 
C15   1   -0.138236    0.347994    0.749623    11.00000    0.03022    0.04314 = 
         0.04761   -0.00882    0.00796    0.00222 
AFIX  43 
H15A  2   -0.209493    0.361135    0.769798    11.00000   -1.20000 
AFIX   0 
C16   1   -0.022799    0.364553    0.809048    11.00000    0.03795    0.03704 = 
         0.04750   -0.01365    0.00709   -0.00370 
AFIX  43 
H16A  2   -0.017100    0.388418    0.870276    11.00000   -1.20000 
AFIX   0 
N12   3   -0.260447    0.291755    0.600216    11.00000    0.02835    0.05746 = 
         0.04423   -0.01476    0.00295   -0.00210 
C17   1   -0.272465    0.253292    0.505491    11.00000    0.04167    0.07374 = 
         0.05319   -0.02180    0.00006   -0.00886 
AFIX 137 
H17A  2   -0.209082    0.224966    0.523449    11.00000   -1.50000 
H17B  2   -0.263037    0.273670    0.440148    11.00000   -1.50000 
H17C  2   -0.353189    0.235914    0.490502    11.00000   -1.50000 
AFIX   0 
C18   1   -0.376482    0.312906    0.622746    11.00000    0.02750    0.07848 = 
         0.06091   -0.01454    0.00171    0.00055 
AFIX 137 
H18A  2   -0.367036    0.317203    0.702454    11.00000   -1.50000 
H18B  2   -0.442655    0.286874    0.594143    11.00000   -1.50000 
H18C  2   -0.396120    0.348560    0.586468    11.00000   -1.50000 
AFIX   0 
N21   3    0.086165    0.659754    0.811552    11.00000    0.02564    0.03401 = 
         0.04399    0.00287    0.00147    0.00423 
H21   2    0.154460    0.643268    0.846853    11.00000   -1.20000 
C22   1   -0.018506    0.643160    0.839423    11.00000    0.03363    0.03040 = 
         0.03692    0.00655    0.00482    0.00014 
AFIX  43 
H22A  2   -0.012992    0.618464    0.899330    11.00000   -1.20000 
AFIX   0 
C23   1   -0.133224    0.661303    0.782762    11.00000    0.02252    0.03705 = 
         0.04141    0.00861    0.00585   -0.00068 
AFIX  43 
H23A  2   -0.204431    0.648876    0.804005    11.00000   -1.20000 
AFIX   0 
C24   1   -0.143788    0.699167    0.691352    11.00000    0.03053    0.02965 = 
         0.03471    0.00258    0.00546    0.00030 
C25   1   -0.030252    0.715970    0.665211    11.00000    0.03377    0.03677 = 
         0.04033    0.00975    0.00850    0.00129 
AFIX  43 
H25A  2   -0.031222    0.740817    0.606300    11.00000   -1.20000 
AFIX   0 
C26   1    0.080107    0.695682    0.726452    11.00000    0.03010    0.03940 = 
         0.05094    0.00560    0.01170   -0.00095 
AFIX  43 
H26A  2    0.153759    0.707210    0.708471    11.00000   -1.20000 
AFIX   0 
N22   3   -0.255061    0.718694    0.633849    11.00000    0.02684    0.04491 = 
         0.04195    0.01373    0.00306    0.00234 
C27   1   -0.371235    0.699167    0.657218    11.00000    0.02505    0.05725 = 
         0.06097    0.01077    0.00262    0.00271 
AFIX 137 
H27A  2   -0.359025    0.691456    0.736188    11.00000   -1.50000 
H27B  2   -0.397529    0.665571    0.615084    11.00000   -1.50000 
H27C  2   -0.433998    0.727558    0.635841    11.00000   -1.50000 
AFIX   0 
C28   1   -0.266489    0.756310    0.537705    11.00000    0.04684    0.05544 = 
         0.05187    0.02010    0.00311    0.00915 
AFIX 137 
H28A  2   -0.206811    0.786128    0.556740    11.00000   -1.50000 
H28B  2   -0.349126    0.771757    0.518486    11.00000   -1.50000 
H28C  2   -0.251047    0.735788    0.474647    11.00000   -1.50000 
AFIX   0 
O30   4    0.310224    0.592563    0.557755    10.50000    0.07601    0.14622 = 
         0.05332    0.04092    0.00650    0.00024 
H30A  2    0.346814    0.562061    0.562635    10.50000   -1.50000 
H30B  2    0.354368    0.615071    0.600919    10.50000   -1.50000 
  
HKLF 4 
  
REM  V10DMAP6_2_Cu in P2(1)/n 
REM R1 =  0.0424 for    4352 Fo > 4sig(Fo)  and  0.0583 for all    5572 data 
REM    445 parameters refined using      6 restraints 
  
END 
  
WGHT      0.0662      3.0400 
  
REM Highest difference peak  0.642,  deepest hole -0.450,  1-sigma level  0.078 
Q1    1   0.5674  0.5280  1.1844  11.00000  0.05    0.64 
Q2    1   0.2961  0.5301  0.9770  11.00000  0.05    0.62 
Q3    1   0.4327  0.5344  0.8180  11.00000  0.05    0.57 
Q4    1   0.5286  0.6461  1.0661  11.00000  0.05    0.56 
Q5    1   0.6658  0.5315  0.9265  11.00000  0.05    0.56 
Q6    1   0.4412  0.5965  0.8344  11.00000  0.05    0.56 
Q7    1   0.2938  0.5943  0.9718  11.00000  0.05    0.54 
Q8    1  -0.2123  0.5593  0.5172  11.00000  0.05    0.54 
Q9    1   0.5622  0.5891  1.1845  11.00000  0.05    0.52 
Q10   1   0.3035  0.4700  0.9703  11.00000  0.05    0.51 
Q11   1   0.7001  0.5943  1.0421  11.00000  0.05    0.51 
Q12   1   0.5722  0.6598  1.1886  11.00000  0.05    0.49 
Q13   1   0.6673  0.4713  0.9197  11.00000  0.05    0.49 
Q14   1   0.4309  0.6582  0.8267  11.00000  0.05    0.49 
Q15   1   0.6335  0.6149  1.1263  11.00000  0.05    0.49 
Q16   1   0.5426  0.6212  0.8750  11.00000  0.05    0.48 
Q17   1   0.3240  0.5907  1.0946  11.00000  0.05    0.46 
Q18   1   0.3651  0.5053  0.8838  11.00000  0.05    0.46 
Q19   1   0.6734  0.5962  0.9239  11.00000  0.05    0.45 
Q20   1   0.4710  0.4721  0.9212  11.00000  0.05    0.44 
; 
_shelx_res_checksum   91649 
  
_shelx_hkl_file 
; 
   0   0  -1 3.60924 29.5648   1 
   0   0  -1 79.6476 51.9614  36 
   0   0   1 40.7308 29.9380  22 
   0   0   1 30.0761 49.2287  23 
   0   0   2 6079.88 357.294  23 
   0   0  -2 6414.33 299.578   1 
   0   0  -3 1.82293 87.6400   1 
   0   0   3 42.6462 87.0409  22 
   0   0  -3 125.724 152.610  36 
   0   0   3 59.3078 127.724  23 
   0   0  -4 34600.8 927.325   1 
   0   0   4 33016.8 1065.10  23 
   0   0  -5-6.50049 174.834  36 
   0   0   5 121.301 173.267  23 
   0   0  -5 60.9470 134.537   1 
   0   0   5-69.6925 157.275  22 
   0   0   6 29595.8 1054.11  22 
   0   0  -6 31163.5 1084.58   1 
   0   0   6 29457.2 1110.07  23 
   0   0  -6 30348.9 1189.98  36 
   0   0   7 568.241 253.056  38 
   0   0  -7 366.238 274.227  36 
   0   0  -7-167.036 203.686   1 
   0   0   7-163.729 234.513  22 
   0   0   7-156.590 211.544  23 
   0   0  -8 140625. 2698.72   1 
   0   0   8 135828. 2536.99  23 
   0   0   8 136148. 2604.96  38 
   0   0  -8 141153. 2669.07  36 
   0   0   8 138063. 2616.15  22 
   0   0  -9 232.543 226.742  36 
   0   0   9-75.7319 211.562  22 
   0   0   9 191.574 220.869  38 
   0   0   9 517.393 266.168  23 
   0   0  -9-174.381 226.334   1 
   0   0  10 1420.83 355.736  38 
   0   0  10 1288.22 338.073  23 
   0   0 -10 722.906 273.619   1 
   0   0 -10 1164.94 294.179  36 
   0   0  10 727.316 296.168  35 
   0   0 -10 1097.60 325.542  29 
   0   0  10 1205.48 293.780  34 
   0   0  10 692.131 303.930  16 
   0   0 -11-0.50236 238.168  29 
   0   0  11 139.720 256.551  35 
   0   0  11-96.6526 273.207  16 
   0   0  11 67.4918 210.920  34 
   0   0 -12 17286.5 901.952  29 
   0   0  12 18439.6 952.938  16 
   0   0  12 17678.3 925.933  35 
   0   0 -13-29.3016 189.377  29 
   0   0  13-22.2872 198.476  35 
   0   0 -13 93.2522 179.978  26 
   0   0 -14 554.108 152.468  29 
   0   0  14 519.531 162.061  35 
   0   0 -14 430.940 160.880  26 
   0   0  14 189.384 132.169  16 
   0  -1   1 830731. 2108.18  22 
   0   1  -1 814218. 2079.90   1 
   0  -1  -1 812645. 2905.70  36 
   0  -1   1 810762. 1596.72  40 
   0  -1  -1 816150. 2641.62   1 
   0   1  -2 53.1878 99.7070  36 
   0  -1   2 54.9745 95.5455  23 
   0  -1   2 75.7871 56.8736  22 
   0   1   2 138.475 99.6161  23 
   0  -1  -2 42.4899 70.5986   1 
   0   1   2 33.7763 68.8717  22 
   0  -1  -2 49.8259 46.0226  40 
   0   1  -2 163.652 76.1020   1 
   0  -1  -2 48.8282 111.535  36 
   0  -1   3 11081.8 572.119  23 
   0  -1  -3 11163.1 477.374   1 
   0   1   3 11132.3 462.756  22 
   0  -1   3 11016.9 435.817  22 
   0   1  -3 10213.6 526.577  36 
   0  -1  -3 11995.7 597.532  36 
   0   1   3 11089.8 567.534  23 
   0   1  -3 11010.1 446.151   1 
   0   1   4 825.940 200.264  23 
   0  -1   4 877.838 181.507  22 
   0  -1  -4 737.752 184.001   1 
   0   1  -4 630.507 159.702   1 
   0   1   4 847.384 188.207  22 
   0  -1   4 872.427 218.100  23 
   0   1  -4 710.426 205.777  36 
   0  -1  -4 741.578 218.713  36 
   0  -1   5 30109.5 1110.87  23 
   0   1  -5 31482.0 1002.77   1 
   0  -1   5 31946.7 971.342  22 
   0  -1  -5 30714.6 1149.57  36 
   0   1   5 32016.8 996.813  22 
   0   1   5 32868.4 1101.25  23 
   0  -1  -5 32020.8 1017.71   1 
   0   1  -5 29712.5 1108.39  36 
   0  -1  -6 3191.37 437.623  36 
   0   1   6 3169.63 375.174  22 
   0  -1  -6 3471.47 389.500   1 
   0   1  -6 3502.91 402.804   1 
   0   1  -6 3629.00 450.509  36 
   0   1   6 3609.63 404.633  23 
   0  -1   6 3310.38 409.883  23 
   0  -1   6 3341.28 377.053  22 
   0   1   7 45045.1 1416.02  22 
   0   1   7 49458.4 1499.81  38 
   0  -1   7 47489.8 1500.49  38 
   0   1  -7 48957.9 1562.75  36 
   0  -1  -7 48811.7 1546.05  36 
   0   1   7 45990.9 1379.27  23 
   0  -1   7 47157.9 1502.15  23 
   0  -1   7 46123.2 1425.49  22 
   0  -1  -7 44108.8 1429.34   1 
   0   1  -7 48709.5 1460.50   1 
   0   1   8 13949.4 854.538  38 
   0   1  -8 14963.1 884.151   1 
   0   1  -8 15088.5 848.603  21 
   0   1  -8 13745.3 870.982  36 
   0   1   8 13227.7 841.973  22 
   0  -1   8 14544.6 895.994  23 
   0  -1  -8 15110.4 897.366   1 
   0  -1  -8 14236.4 886.872  36 
   0  -1   8 13257.2 842.212  22 
   0  -1   8 13255.9 854.453  38 
   0   1   8 14814.9 829.825  23 
   0   1   9 35624.6 1335.91  23 
   0  -1  -9 38280.3 1410.00  21 
   0   1   9 34147.3 1406.10  22 
   0   1   9 35008.2 1380.62  38 
   0  -1  -9 40064.9 1497.86   1 
   0   1  -9 41615.4 1526.89   1 
   0   1  -9 35009.4 1377.95  36 
   0  -1  -9 34947.6 1369.57  36 
   0  -1   9 34855.9 1392.97  38 
   0  -1   9 34901.3 1377.48  23 
   0   1  10-114.628 181.453  34 
   0   1  10 107.258 196.499  23 
   0  -1 -10 239.823 223.544   1 
   0   1  10-376.190 284.261  16 
   0  -1  10-276.240 292.602  16 
   0   1 -10-289.845 265.042  36 
   0   1  10-42.4370 160.719  22 
   0   1 -10 224.105 216.170  29 
   0   1  10-23.6023 207.402  35 
   0  -1  10-117.264 214.128  35 
   0   1  10-4.04945 188.726  38 
   0   1 -10-115.891 232.051  17 
   0  -1  10-37.7692 194.954  23 
   0  -1  10 17.1271 188.804  38 
   0  -1 -10-79.1403 248.439  29 
   0  -1 -10-422.126 292.003  36 
   0  -1 -11 18996.4 1011.61  29 
   0   1  11 20703.3 990.547  34 
   0   1 -11 21696.1 1028.09  17 
   0   1  11 19314.7 1030.04  35 
   0   1  11 17803.9 1006.58  16 
   0  -1  11 17930.9 1036.43  16 
   0   1 -11 18845.9 1015.68  29 
   0  -1  11 18433.4 1028.35  35 
   0   1  12 5000.35 460.736  34 
   0  -1  12 4144.14 522.223  16 
   0  -1  12 3739.58 478.108  35 
   0   1 -12 4800.45 507.784  29 
   0  -1 -12 4227.14 464.793  29 
   0   1  12 4149.79 505.619  35 
   0   1  12 4013.12 490.207  16 
   0  -1 -13 106.628 193.089  26 
   0  -1  13 496.707 212.096  35 
   0   1  13 378.135 212.781  16 
   0   1  13 392.824 208.651  35 
   0  -1  13-76.7183 219.175  16 
   0   1 -13 297.614 198.239  29 
   0  -1 -13 469.282 199.514  29 
   0  -1  14-32.3990 126.446  35 
   0  -1 -14 82.5845 130.727  26 
   0  -1  14-162.441 155.455  16 
   0   1 -14-21.3232 135.913  26 
   0   1 -14-33.9217 115.819  29 
   0  -1 -14 16.4102 112.292  29 
   0   1  14-7.05332 124.069  35 
   0   1  14 58.0980 129.182  16 
   0   2   0 298748. 1119.10   2 
   0  -2   0 298920. 1945.14  40 
   0  -2   0 301872. 1195.21  24 
   0   2   1 2377.96 138.092  23 
   0  -2   1 2399.60 157.702  23 
   0   2  -1 2361.99 117.307  37 
   0   2   1 2412.13 159.448  21 
   0  -2  -1 2389.43 142.412  24 
   0   2   1 2241.06 84.3809  39 
   0  -2  -1 2336.79 208.633  40 
   0   2  -1 2502.31 140.143  36 
   0   2   1 2546.64 172.431  37 
   0   2   1 2339.67 154.974  22 
   0  -2  -1 2438.84 169.859   1 
   0  -2   1 2599.95 141.558  40 
   0  -2  -1 2433.49 163.574  36 
   0   2  -1 2411.59 124.228  21 
   0   2  -2 123231. 1128.89  21 
   0  -2  -2 118830. 1316.92  40 
   0  -2   2 126054. 928.998  40 
   0  -2   2 112143. 1499.12  23 
   0  -2  -2 122260. 1434.49   1 
   0   2  -2 117671. 1400.38  36 
   0   2   2 120278. 1459.81  23 
   0   2  -2 118332. 1134.26   1 
   0  -2  -2 120960. 1582.04  36 
   0   2   2 123943. 1366.41  22 
   0   2   2 125122. 1362.18  37 
   0  -2   2 124500. 1168.21  22 
   0   2   3 7919.53 406.317  22 
   0  -2  -3 7647.70 492.777  36 
   0  -2   3 7966.47 255.108  40 
   0   2  -3 7710.92 372.268   1 
   0   2  -3 7182.13 428.663  36 
   0  -2   3 7664.34 365.254  22 
   0  -2  -3 7687.67 425.063   1 
   0  -2   3 7109.09 468.059  23 
   0   2   3 7604.81 446.857  23 
   0  -2  -3 7116.71 338.307  40 
   0   2  -4 1859.66 275.134  36 
   0  -2   4 2182.21 145.534  40 
   0  -2  -4 1816.36 304.433  36 
   0  -2   4 1910.25 305.648  23 
   0   2   4 2153.53 262.011  22 
   0  -2  -4 2044.68 260.571   1 
   0  -2   4 2034.47 237.356  22 
   0   2   4 2838.30 322.468  23 
   0   2  -4 1985.63 244.933   1 
   0  -2  -5 934.943 263.832  36 
   0   2   5 1112.01 248.840  23 
   0  -2  -5 639.512 205.119   1 
   0   2  -5 898.508 243.140  36 
   0  -2   5 684.854 221.930  23 
   0   2   5 745.230 213.484  22 
   0  -2   5 818.965 201.653  22 
   0   2  -5 848.404 200.901   1 
   0   2  -6 423.983 164.711  21 
   0  -2  -6 437.966 195.568   1 
   0  -2   6 595.577 203.568  22 
   0   2  -6 608.663 213.234   1 
   0  -2   6 670.173 246.543  23 
   0   2   6 336.862 169.108  23 
   0  -2  -6 381.602 206.474  36 
   0   2   6 515.393 215.747  22 
   0   2  -6 813.247 276.211  36 
   0  -2   7 4543.81 525.934  23 
   0   2   7 3725.74 405.176  23 
   0   2  -7 3979.56 428.090  21 
   0   2  -7 4174.53 486.946  36 
   0  -2   7 4404.93 514.982  38 
   0  -2  -7 4018.99 490.314  36 
   0   2  -7 3843.37 438.292   1 
   0   2   7 2895.03 392.651  22 
   0   2   7 3983.17 477.463  38 
   0  -2  -7 3513.90 436.992   1 
   0  -2   7 3530.04 429.484  22 
   0  -2   8 11578.2 792.268  22 
   0  -2   8 12742.7 833.234  38 
   0  -2  -8 12237.9 802.791   1 
   0   2  -8 12597.8 825.352   1 
   0   2  -8 13487.2 810.047  21 
   0   2   8 13624.1 845.607  38 
   0   2   8 13917.7 794.942  23 
   0   2  -8 12935.7 843.793  36 
   0   2   8 12253.4 817.476  22 
   0  -2   8 12734.4 859.900  23 
   0  -2  -8 14680.3 880.350  36 
   0   2  -9 15918.5 982.032   1 
   0   2   9 15883.4 964.267  22 
   0  -2   9 15290.5 953.835  23 
   0   2  -9 15128.5 929.406  36 
   0  -2   9 15464.2 955.321  38 
   0  -2  -9 16425.2 984.463   1 
   0   2   9 16294.4 906.245  23 
   0  -2  -9 15695.9 919.603  36 
   0   2   9 15534.8 938.944  38 
   0   2 -10 1411.68 323.760  17 
   0   2  10 1876.12 369.687  23 
   0   2  10 1343.05 341.179  22 
   0  -2 -10 1836.85 378.330   1 
   0  -2  10 2284.50 411.653  38 
   0   2 -10 1271.37 297.967  36 
   0  -2  10 1609.30 350.692  23 
   0   2  10 1789.17 400.404  16 
   0  -2 -10 1749.94 373.778  29 
   0   2 -10 1698.05 388.194  29 
   0  -2  10 1352.71 353.619  16 
   0   2  10 1767.84 391.601  35 
   0   2  10 1832.83 373.314  38 
   0  -2  10 1879.69 398.751  35 
   0  -2 -10 1734.71 347.022  36 
   0   2  10 2161.63 392.190  34 
   0  -2  11 3410.00 520.052  35 
   0   2 -11 3535.39 496.193  29 
   0  -2 -11 3878.44 503.066  29 
   0   2  11 3881.24 516.807  35 
   0   2  11 4345.36 481.320  34 
   0   2 -11 4682.92 513.271  17 
   0  -2  11 3172.80 490.096  16 
   0   2  11 3310.19 482.021  16 
   0  -2 -12 2520.43 362.552  29 
   0   2  12 2473.20 402.047  16 
   0   2 -12 2306.60 396.099  29 
   0   2 -12 2846.74 374.550  17 
   0  -2  12 2561.82 430.317  35 
   0   2  12 2585.61 425.042  35 
   0  -2  12 2624.25 440.022  16 
   0   2  12 2816.13 375.315  34 
   0   2  13 525.438 229.632  16 
   0  -2  13 924.301 270.472  16 
   0   2  13 709.449 238.289  35 
   0  -2  13 608.607 235.154  35 
   0   2 -13 317.814 184.004  29 
   0  -2 -13 474.842 215.367  26 
   0  -2 -13 818.858 225.306  29 
   0  -2 -14 329.683 149.880  26 
   0  -2 -14 380.735 137.963  29 
   0  -2  14 212.028 137.277  35 
   0   2 -14 280.162 127.643   7 
   0   2 -14 384.561 148.591  26 
   0  -2  14 126.629 134.559  16 
   0   2  14 194.457 125.964  16 
   0   2  14 358.478 153.503  35 
   0   2 -14 348.939 142.253  29 
   0  -3   0 247.471 107.055  40 
   0   3   0 84.3553 36.4937   2 
   0  -3   0 88.6447 43.5671  24 
   0   3   0 142.995 51.3233  21 
   0   3   0 181.914 52.3956  37 
   0   3   1 9627.51 358.150  37 
   0   3  -1 9121.86 267.666  37 
   0   3  -1 8846.75 257.269  36 
   0   3   1 9285.65 248.774  23 
   0   3  -1 8602.93 262.842  21 
   0  -3  -1 10251.4 490.699  40 
   0  -3  -1 8975.58 286.721  24 
   0   3   1 10941.8 260.263  39 
   0  -3   1 9741.81 317.371  23 
   0   3   1 9243.95 329.627  21 
   0  -3   1 10472.0 397.278  40 
   0  -3  -1 9305.43 332.740   1 
   0  -3  -1 9903.89 309.492  36 
   0   3  -2 24481.2 520.433  21 
   0   3   2 22152.1 284.176  39 
   0   3  -2 24034.5 482.338  37 
   0  -3   2 22723.3 668.534  23 
   0  -3  -2 23357.3 686.543  36 
   0  -3  -2 24818.1 593.209  24 
   0  -3  -2 25945.4 683.653   1 
   0  -3  -2 21689.3 640.947  40 
   0   3   2 24042.7 602.732  23 
   0   3   2 24009.8 639.039  37 
   0  -3   2 23615.3 525.692  40 
   0   3  -2 25407.9 594.855  36 
   0   3   2 24973.0 642.653  22 
   0   3   3 12144.9 536.649  22 
   0  -3  -3 11524.1 530.852   1 
   0   3  -3 11850.3 522.848  36 
   0   3   3 11852.4 520.054  23 
   0  -3  -3 11527.8 577.538  36 
   0   3   3 11901.9 518.092  37 
   0   3  -3 11565.4 438.150   1 
   0  -3   3 12118.2 380.086  40 
   0  -3   3 11055.6 580.848  23 
   0   3  -3 11670.1 436.816  21 
   0   3  -3 11909.0 401.687  37 
   0  -3   3 10741.5 430.570  22 
   0  -3  -3 11784.8 479.406  40 
   0  -3   4 989.453 115.929  40 
   0   3  -4 973.704 165.103  21 
   0  -3  -4 983.096 208.216   1 
   0   3  -4 1027.49 182.133   1 
   0  -3  -4 1001.08 250.179  36 
   0   3   4 801.182 197.688  22 
   0  -3  -4 707.509 139.868  40 
   0  -3   4 831.966 181.467  22 
   0  -3   4 723.611 208.023  23 
   0   3  -4 826.256 212.388  36 
   0   3   4 957.694 200.951  23 
   0   3  -5 6951.34 465.996   1 
   0   3  -5 6713.43 440.294  21 
   0   3   5 6316.32 480.507  22 
   0   3   5 6732.09 473.792  23 
   0   3  -5 6090.70 493.985  36 
   0  -3   5 6553.51 553.447  23 
   0  -3  -5 6421.37 533.497  36 
   0  -3   5 6567.70 457.448  22 
   0  -3  -5 6278.73 484.482   1 
   0   3   6 655.993 218.960  22 
   0   3  -6 834.143 169.276  37 
   0  -3   6 1161.42 345.063  38 
   0   3   6 679.833 200.188  23 
   0   3  -6 728.585 210.928   1 
   0   3  -6 730.259 239.309  36 
   0   3  -6 690.016 189.598  21 
   0  -3  -6 779.215 236.587   1 
   0  -3  -6 787.063 267.678  36 
   0   3   6 964.579 279.198  38 
   0  -3   6 815.635 276.127  23 
   0  -3   6 802.758 236.804  22 
   0  -3  -7 2945.16 442.396  36 
   0   3   7 2405.07 360.822  22 
   0  -3  -7 2396.28 376.151   1 
   0  -3   7 2965.59 472.165  23 
   0   3  -7 2611.72 386.344  36 
   0   3   7 2800.47 405.040  38 
   0   3  -7 2858.66 395.193   1 
   0   3  -7 2941.60 370.174  21 
   0   3   7 2828.64 351.219  23 
   0  -3   7 2726.64 430.665  38 
   0  -3   8 1891.22 368.132  38 
   0   3  -8 1800.83 371.078   1 
   0  -3   8 2145.55 425.985  23 
   0   3   8 2176.71 344.368  23 
   0  -3  -8 1425.38 321.990   1 
   0   3   8 2042.25 373.513  38 
   0   3  -8 1237.54 326.607  36 
   0   3   8 1345.41 301.465  22 
   0  -3  -8 2246.42 411.869  36 
   0   3  -8 2271.41 343.865  21 
   0  -3  -9 1639.15 366.882   1 
   0   3  -9 1295.12 320.546  36 
   0  -3   9 1388.04 365.851  23 
   0  -3   9 1799.44 373.258  38 
   0   3   9 1778.46 351.335  38 
   0  -3  -9 2119.51 397.484  36 
   0   3   9 1375.41 329.681  22 
   0   3   9 1839.89 339.310  23 
   0   3 -10-410.710 275.178  36 
   0   3 -10-2.19264 216.129  29 
   0   3  10 26.0314 225.104  35 
   0  -3  10-112.269 247.272  35 
   0  -3 -10-91.3626 215.123  29 
   0   3 -10 155.799 246.763  17 
   0  -3  10 258.473 204.246  38 
   0  -3  10-293.480 275.843  23 
   0   3  10 149.792 206.581  38 
   0  -3 -10 195.824 246.107   1 
   0  -3  10 395.413 273.133  27 
   0  -3  10-38.0959 307.278  16 
   0   3  10 241.173 241.752  16 
   0   3  10-138.565 231.958  22 
   0   3  10 158.239 191.761  34 
   0  -3 -10-142.492 223.876  36 
   0  -3  11 69.2151 301.382  16 
   0   3 -11 809.627 283.188  17 
   0  -3 -11 767.354 279.015  29 
   0   3  11 936.803 281.383  34 
   0  -3  11 605.825 266.658  35 
   0   3 -11 869.318 321.511  29 
   0   3  11 664.798 309.845  16 
   0   3  11 933.013 340.507  35 
   0   3  12 3279.79 396.004  34 
   0  -3  12 2992.71 424.205  35 
   0  -3 -12 2696.48 379.035  29 
   0  -3  12 2577.78 444.545  16 
   0   3  12 2284.80 381.792  16 
   0   3 -12 3218.07 409.440  17 
   0  -3 -12 2775.27 413.660  26 
   0   3  12 2545.72 398.379  35 
   0   3 -12 2357.79 401.750  29 
   0   3  13 253.802 134.310  34 
   0   3  13 155.852 190.244  16 
   0  -3  13 377.588 210.841  35 
   0  -3 -13 309.758 203.535  29 
   0   3 -13 114.208 180.351  29 
   0  -3  13 293.264 214.588  16 
   0  -3 -13 212.216 185.740  26 
   0   3  13 88.6761 183.645  35 
   0  -3 -14 57.9821 134.229  26 
   0  -3 -14 199.911 111.086  29 
   0   3  14 161.168 145.597  35 
   0  -3  14-94.6049 143.379  16 
   0   3  14 144.283 133.791  16 
   0  -3  14 109.118 108.991  35 
   0   3 -14 214.281 142.704  29 
   0   3 -14 244.840 146.776  26 
   0   4   0 20034.1 485.914  37 
   0  -4   0 20917.9 441.209  24 
   0   4   0 20771.9 419.872   2 
   0   4   0 20656.1 467.664  21 
   0   4   1 14296.7 438.242  21 
   0  -4   1 14674.1 397.614  23 
   0  -4   1 13513.1 529.820  40 
   0   4  -1 13523.5 336.669  36 
   0  -4  -1 14120.5 436.163   1 
   0  -4  -1 13440.1 384.533  24 
   0   4  -1 13859.0 374.581  21 
   0   4   1 14553.3 470.922  37 
   0   4  -1 13831.7 378.061  37 
   0   4   1 13791.2 309.642  23 
   0  -4  -1 14389.9 624.820  40 
   0  -4  -2 3635.43 288.230   1 
   0   4   2 3355.43 130.719  39 
   0   4  -2 3337.76 213.775  21 
   0   4  -2 3511.69 227.700  36 
   0  -4   2 4860.99 318.917  40 
   0   4   2 4291.04 301.097  37 
   0  -4  -2 4250.44 330.519  40 
   0   4   2 3192.88 251.434  22 
   0   4  -2 3498.40 207.836  37 
   0  -4  -2 3376.61 236.529  24 
   0  -4   2 3981.46 289.539  23 
   0   4   2 4111.22 247.728  23 
   0  -4  -2 4182.61 299.093  36 
   0  -4  -3 14390.4 567.142  40 
   0   4   3 15136.0 553.970  23 
   0   4   3 14431.9 585.160  22 
   0   4  -3 14654.1 500.565  21 
   0   4  -3 14982.2 565.111  36 
   0   4  -3 14818.1 466.609  37 
   0   4   3 14108.0 577.846  37 
   0  -4  -3 14475.8 632.248  36 
   0  -4   3 13822.2 639.133  23 
   0  -4   3 14095.5 496.674  40 
   0  -4  -3 14347.3 604.795   1 
   0   4  -4 18546.5 640.616  21 
   0   4  -4 17627.8 732.231  36 
   0  -4   4 19101.7 556.422  40 
   0   4  -4 18488.3 585.564  37 
   0   4   4 19360.1 692.801  23 
   0   4  -4 17350.6 623.720   1 
   0   4   4 17995.3 728.972  22 
   0  -4  -4 18664.5 809.084  36 
   0  -4  -4 18577.3 650.847  40 
   0  -4  -4 17163.1 735.141   1 
   0  -4   4 16441.3 790.968  23 
   0  -4   5 170.276 216.027  23 
   0  -4  -5 131.910 148.304   1 
   0   4   5 282.408 136.239  23 
   0   4  -5 330.291 152.712   1 
   0  -4  -5 354.521 201.923  36 
   0   4  -5 470.449 198.886  36 
   0   4  -5 291.256 112.304  37 
   0   4   5 371.173 197.556  22 
   0   4  -5 233.399 142.203  21 
   0  -4  -6 1387.08 285.970   1 
   0  -4  -6 1112.53 278.832  36 
   0   4  -6 1333.89 246.994  21 
   0   4   6 1325.23 279.932  22 
   0   4  -6 1231.98 202.535  37 
   0   4   6 1373.07 252.912  23 
   0   4  -6 1512.22 276.574   1 
   0  -4   6 1959.49 383.835  38 
   0   4   6 2428.99 369.978  38 
   0  -4   6 1353.67 357.150  23 
   0   4  -6 1194.97 285.616  36 
   0  -4   7 9770.90 746.686  38 
   0   4  -7 11036.2 694.474  21 
   0   4   7 10034.5 687.572  22 
   0  -4   7 9094.69 745.488  23 
   0   4  -7 9402.20 679.755  36 
   0  -4  -7 9724.55 687.171   1 
   0   4   7 9949.38 686.096  38 
   0   4   7 10112.8 611.234  23 
   0  -4  -7 9503.33 701.928  36 
   0  -4  -8 1460.85 323.341   1 
   0  -4  -8 2463.08 436.987  36 
   0   4   8 2128.63 333.409  23 
   0   4  -8 1691.69 352.161  36 
   0   4   8 2164.87 373.576  38 
   0  -4   8 2110.13 386.633  38 
   0   4  -8 2092.33 336.896  21 
   0  -4   8 1975.68 430.100  23 
   0   4   8 1708.87 340.102  22 
   0   4   9 396.817 237.968  38 
   0  -4   9 317.818 256.581  23 
   0  -4  -9 42.4532 206.810   1 
   0   4  -9-106.238 247.838  36 
   0   4   9 187.149 218.426  22 
   0  -4  -9 405.401 249.193  36 
   0  -4   9 243.139 226.166  38 
   0   4   9 352.920 224.860  35 
   0   4   9 276.133 195.980  23 
   0   4  10 921.129 280.379  34 
   0  -4  10 665.330 250.883  27 
   0   4 -10 789.740 291.474  29 
   0  -4  10 566.621 238.979  35 
   0  -4 -10 949.298 299.743  29 
   0   4  10 715.501 276.630  35 
   0   4  10 1209.83 364.764  16 
   0   4  10 845.191 287.562  22 
   0   4 -10 1198.58 350.555  17 
   0  -4 -11-84.0743 225.237  29 
   0  -4  11-8.13269 215.979  27 
   0   4  11 354.012 230.299  34 
   0   4 -11 182.255 226.262  17 
   0   4  11 62.6592 229.770  35 
   0  -4  11 57.2104 235.049  35 
   0  -4  11-335.990 348.316  16 
   0   4 -11 46.9782 237.544  29 
   0   4  11 125.029 256.372  16 
   0  -4  12 332.522 309.578  16 
   0  -4 -12 646.207 267.982  26 
   0   4  12 927.103 254.426  34 
   0  -4 -12 759.786 260.627  29 
   0   4  12 851.277 290.679  35 
   0   4 -12 572.032 271.792  29 
   0   4 -12 722.687 254.885  17 
   0   4  12 661.501 276.519  16 
   0  -4  12 487.547 246.659  35 
   0   4  13 995.336 262.751  35 
   0  -4 -13 814.776 238.039  26 
   0  -4  13 1086.24 280.426  16 
   0  -4 -13 950.504 225.517  29 
   0   4 -13 787.035 196.590  17 
   0   4  13 727.011 194.082  34 
   0   4 -13 633.701 234.560  29 
   0   4  13 649.084 227.420  16 
   0  -4  13 1180.23 258.842  35 
   0  -4  14 768.710 179.345  16 
   0   4 -14 835.674 183.505  26 
   0  -4 -14 769.323 145.977  29 
   0  -4 -14 823.979 173.488  26 
   0   4 -14 709.404 176.766  29 
   0   4  14 840.054 181.483  35 
   0   4  14 976.254 181.044  16 
   0  -4  14 824.664 170.102  35 
   0   5   0-44.6150 75.0173  37 
   0  -5   0-3.64929 58.8967  24 
   0   5   0-1.13853 60.1361  21 
   0   5   0-13.0168 52.1425   2 
   0  -5  -1 190674. 2405.48  40 
   0  -5   1 207646. 1540.79  23 
   0   5  -1 200397. 1601.76  37 
   0  -5   1 202579. 1275.37  38 
   0   5   1 197631. 1622.52   2 
   0   5  -1 196232. 1465.26   2 
   0   5   1 203039. 1888.34  37 
   0   5   1 191565. 1180.61  23 
   0  -5  -1 205067. 1607.05  24 
   0   5   1 206475. 1493.77  38 
   0  -5   1 185982. 2220.22  40 
   0  -5  -1 201330. 1719.51   1 
   0   5   1 203603. 1782.74  21 
   0   5  -1 207164. 1387.13  36 
   0   5  -1 203912. 1597.67  21 
   0  -5   2 108380. 1664.59  40 
   0   5   2 112074. 1213.15  23 
   0  -5   2 114902. 1456.53  23 
   0   5  -2 112175. 1245.76  37 
   0   5   2 115966. 1608.86  37 
   0  -5  -2 104906. 1697.72  40 
   0   5   2 115881. 1525.25  21 
   0   5   2 112743. 1484.73  22 
   0  -5  -2 112984. 1341.49  24 
   0  -5  -2 116746. 1521.07  36 
   0   5  -2 115076. 1258.92  36 
   0  -5  -2 118265. 1609.31   1 
   0   5   2 109102. 871.096  39 
   0   5  -2 109306. 1264.63  21 
   0   5  -3 49169.4 897.376  37 
   0   5   3 49061.8 950.008  23 
   0  -5  -3 48178.9 1147.46   1 
   0   5  -3 49191.9 941.885  21 
   0  -5  -3 49135.3 1138.91  40 
   0   5  -3 48523.6 1015.26  36 
   0  -5   3 47686.3 1062.57  40 
   0  -5   3 46276.4 1148.44  23 
   0   5   3 47819.6 1084.07  22 
   0  -5  -3 49273.2 1154.35  36 
   0   5   3 48207.7 1097.85  37 
   0   5  -4 9745.68 443.899  37 
   0  -5  -4 9782.19 519.623  40 
   0   5   4 10315.7 496.058  23 
   0  -5   4 8975.55 598.164  23 
   0  -5  -4 9588.26 564.587   1 
   0   5  -4 10296.1 494.226  21 
   0  -5  -4 10126.7 594.475  36 
   0  -5   4 10030.5 462.603  40 
   0   5   4 9940.47 557.620  22 
   0   5  -4 9812.29 544.377  36 
   0  -5   5 1986.39 357.445  23 
   0   5   5 2293.28 271.721  23 
   0   5  -5 2386.01 284.570  21 
   0  -5  -5 2339.52 262.450  40 
   0   5  -5 2461.78 320.277  36 
   0  -5   5 3265.22 456.396  38 
   0  -5  -5 2272.14 315.613   1 
   0  -5  -5 2936.45 376.462  36 
   0   5   5 2076.49 315.611  22 
   0   5  -5 2409.69 255.076  37 
   0   5   6 68.1028 169.443  38 
   0   5   6-102.566 212.704  22 
   0  -5  -6-253.983 206.310  36 
   0  -5  -6 51.3268 171.225   1 
   0   5  -6-58.0883 90.8167  37 
   0   5  -6-73.7658 167.107  36 
   0   5  -6 89.9362 137.913  21 
   0  -5   6 147.495 231.577  38 
   0  -5   6-8.44733 197.107  23 
   0   5   6 106.525 139.593  23 
   0  -5   7 17926.5 1009.15  38 
   0  -5  -7 15813.9 879.256   1 
   0  -5   7 15548.1 987.834  23 
   0   5  -7 18569.5 893.438  21 
   0   5   7 18765.3 798.552  23 
   0   5  -7 16331.5 885.451  36 
   0  -5  -7 16334.4 908.420  36 
   0   5   7 17515.5 911.493  22 
   0   5   7 17760.4 911.916  38 
   0   5   8 1427.87 334.281  22 
   0  -5   8 1094.83 328.526  23 
   0   5   8 1465.49 314.677  38 
   0  -5   8 1737.63 364.308  38 
   0   5  -8 1034.25 282.078  36 
   0   5   8 1480.70 279.298  23 
   0   5  -8 1536.34 307.873  21 
   0  -5  -8 1227.29 305.797   1 
   0  -5  -8 2014.05 397.313  36 
   0  -5  -9 1667.62 358.326  36 
   0  -5   9 1561.67 366.783  38 
   0   5   9 1797.62 361.438  22 
   0   5   9 1512.64 314.959  35 
   0  -5   9 1283.28 314.593  35 
   0   5  -9 1468.95 346.665  29 
   0  -5   9 1204.97 365.302  23 
   0   5   9 1468.21 321.602  38 
   0  -5  -9 1415.42 322.082   1 
   0   5  -9 1093.29 303.683  36 
   0   5   9 1761.89 328.007  34 
   0   5   9 1391.86 351.290  16 
   0   5  -9 1205.20 312.747  17 
   0  -5 -10 204.011 195.462  29 
   0  -5  10 78.6399 224.764  35 
   0   5  10 523.029 271.963  34 
   0   5  10 51.5972 235.729  16 
   0   5  10 188.890 226.047  35 
   0   5 -10 116.859 237.388  29 
   0  -5  10 412.211 264.973  27 
   0   5 -10 222.316 268.620  17 
   0   5 -11-29.2337 251.961  29 
   0   5  11 47.9500 191.343  34 
   0   5 -11 143.255 222.040  17 
   0   5  11 102.530 235.943  35 
   0   5  11 71.7980 234.179  16 
   0  -5 -11 12.2947 239.996  26 
   0  -5  11 174.995 249.873  27 
   0  -5  11-265.813 270.771  35 
   0  -5 -11 105.134 197.659  29 
   0  -5  11-263.609 333.947  16 
   0   5 -12 735.919 270.044  17 
   0  -5  12 845.466 326.585  16 
   0  -5  12 678.125 260.600  35 
   0   5  12 687.411 225.859  34 
   0   5  12 727.950 315.064  35 
   0  -5  12 848.401 273.701  27 
   0   5 -12 833.419 287.120  29 
   0   5  12 682.363 283.400  16 
   0  -5 -12 879.766 274.916  29 
   0  -5 -12 1204.24 310.372  26 
   0   5  13 1062.42 261.598  35 
   0  -5  13 1020.84 235.543  35 
   0  -5  13 1184.33 306.244  16 
   0   5 -13 1378.81 240.037  17 
   0  -5 -13 1018.74 214.184  29 
   0  -5 -13 1078.35 255.978  26 
   0   5  13 1225.22 224.098  34 
   0   5  13 812.021 239.622  16 
   0   5 -13 979.767 271.577  29 
   0  -6   0 47222.4 816.296  24 
   0   6   0 48368.0 865.442  21 
   0   6   0 46559.3 777.604   2 
   0  -6   0 46520.4 1230.30  40 
   0   6   0 44973.8 905.341  37 
   0  -6  -1 83347.6 1208.79   1 
   0  -6  -1 87020.8 1142.13  24 
   0  -6   1 81422.1 1574.65  40 
   0   6   1 85973.4 780.174  38 
   0   6   1 86517.3 1332.79  37 
   0  -6   1 86439.5 671.000  38 
   0   6   1 80880.9 1134.93   2 
   0  -6  -1 86343.7 1716.48  40 
   0   6  -1 82827.5 1164.61  37 
   0   6  -1 83371.1 1034.69   2 
   0   6  -1 86020.4 944.723  36 
   0  -6   1 85552.8 1186.11  24 
   0   6  -1 86430.9 1144.49  21 
   0   6   1 86086.1 1254.04  21 
   0   6  -2 660381. 3289.10  21 
   0   6   2 665044. 4088.29  37 
   0   6  -2 647967. 3229.88  37 
   0  -6  -2 660300. 3951.14   1 
   0   6   2 653077. 2945.43  23 
   0   6   2 659589. 3876.03  21 
   0   6   2 666795. 2516.89  39 
   0  -6  -2 650912. 3431.66  24 
   0   6  -2 672166. 3100.54  36 
   0  -6   2 650998. 3524.50  23 
   0  -6  -2 677754. 3707.48  36 
   0   6   3 27019.2 690.480  23 
   0   6  -3 26389.1 694.992  37 
   0  -6   3 28120.6 893.316  23 
   0  -6  -3 26072.0 853.506  36 
   0  -6  -3 26460.3 749.922  24 
   0  -6  -3 26816.5 897.009   1 
   0   6   3 27500.4 868.641  37 
   0  -6   3 25135.1 845.582  40 
   0   6   3 26856.6 838.307  22 
   0   6  -3 26594.6 741.550  36 
   0   6  -3 26714.8 728.425  21 
   0  -6  -3 24942.4 874.172  40 
   0  -6  -4 89728.7 1640.01  40 
   0   6  -4 84999.3 1587.32  36 
   0   6  -4 91421.3 1392.29  37 
   0  -6  -4 93160.5 1777.50   1 
   0   6   4 91998.5 1672.20  37 
   0   6   4 92706.7 1408.43  23 
   0  -6   4 89202.7 1820.56  23 
   0  -6   4 89497.6 1495.40  40 
   0   6   4 92977.9 1681.82  22 
   0  -6   4 81371.6 1871.15  38 
   0   6  -4 92977.3 1502.15  21 
   0  -6  -4 91730.3 1727.68  36 
   0  -6  -5 14824.3 768.915  36 
   0   6  -5 14598.1 685.869  21 
   0   6   5 14919.4 620.725  23 
   0  -6  -5 14265.9 652.281  40 
   0  -6   5 13333.5 828.503  38 
   0   6  -5 13892.8 596.417  37 
   0  -6  -5 15066.7 766.254   1 
   0   6   5 14252.0 721.268  22 
   0  -6   5 14192.1 819.666  23 
   0   6  -5 11988.0 690.360  36 
   0   6   5 14647.3 747.160  38 
   0   6  -6 11786.0 590.988  37 
   0   6   6 12130.1 707.827  38 
   0   6  -6 10897.8 692.272  36 
   0  -6   6 11412.3 794.997  23 
   0  -6  -6 10868.4 714.562  36 
   0   6   6 11361.7 710.077  22 
   0   6  -6 11499.6 661.751  21 
   0  -6  -6 11656.5 723.425   1 
   0  -6   6 10685.8 772.058  38 
   0   6   6 14396.1 650.041  23 
   0   6   7 2330.57 365.837  22 
   0   6  -7 2002.40 338.479  36 
   0   6   7 2634.98 377.708  38 
   0  -6  -7 2391.26 393.139  36 
   0   6   7 2627.70 309.628  23 
   0  -6  -7 2198.21 359.302   1 
   0  -6   7 2602.24 424.854  38 
   0  -6   7 2018.21 392.286  23 
   0   6  -7 2651.94 364.630  21 
   0   6  -8 3005.02 439.599  36 
   0  -6   8 3822.80 520.547  38 
   0   6  -8 4134.12 462.353  21 
   0   6   8 4215.54 496.686  22 
   0  -6  -8 3987.62 495.976   1 
   0  -6  -8 4288.41 511.185  36 
   0   6   8 4147.83 472.566  38 
   0  -6   8 3574.58 524.414  23 
   0   6   9 2884.51 429.131  35 
   0   6  -9 2532.56 432.210  36 
   0  -6   9 2360.87 424.015  35 
   0  -6   9 1981.06 424.603  23 
   0   6  -9 3245.49 480.996  29 
   0   6   9 3129.65 446.534  22 
   0  -6   9 2542.29 428.669  38 
   0  -6  -9 2626.46 429.684   1 
   0  -6  -9 3083.91 429.496  29 
   0   6  -9 1932.24 390.303  17 
   0   6   9 2999.58 445.070  16 
   0   6   9 2711.90 421.204  38 
   0  -6  -9 3117.93 463.428  36 
   0   6   9 3353.48 441.975  34 
   0  -6   9 2218.12 412.053  27 
   0  -6  10 99.8563 257.193  35 
   0  -6 -10 401.428 267.468  26 
   0   6 -10 118.338 231.968  29 
   0   6  10 931.649 313.406  34 
   0   6  10 379.569 255.845  16 
   0  -6 -10 99.8081 229.353  29 
   0  -6  10 523.270 280.153  27 
   0   6 -10 624.267 320.239  17 
   0   6  10 503.005 283.104  35 
   0   6  11 2621.62 426.662  16 
   0   6  11 2609.98 397.992  34 
   0  -6  11 2284.38 426.215  27 
   0   6 -11 2157.20 430.659  29 
   0  -6  11 2161.21 406.967  35 
   0   6 -11 2700.10 442.356  17 
   0  -6  11 2069.43 432.967  16 
   0  -6 -11 2574.69 387.574  29 
   0  -6 -11 2692.62 454.458  26 
   0   6  11 2387.46 412.626  35 
   0  -6 -12 273.206 226.048  26 
   0   6  12 100.898 223.442  16 
   0   6 -12 19.0653 238.778  29 
   0  -6  12 97.4230 209.815  27 
   0  -6 -12 137.967 200.031  29 
   0  -6  12 135.551 214.408  35 
   0  -6  12-246.880 269.547  16 
   0   6 -12 85.2137 201.095  17 
   0   6  12-177.403 182.118  34 
   0   6  12 262.696 243.529  35 
   0   6  13 607.923 227.541  16 
   0   6 -13 627.506 193.278  17 
   0  -6 -13 631.050 189.836  29 
   0  -6  13 799.055 257.013  16 
   0   6 -13 741.050 263.760  29 
   0  -6 -13 698.381 228.527  26 
   0   6  13 553.540 216.904  35 
   0  -6  13 640.249 205.794  35 
   0   6  13 833.591 205.133  34 
   0   7   0 331.624 123.725  37 
   0  -7   0 170.986 104.201  24 
   0   7   0 284.927 95.4580   2 
   0  -7   0 443.095 197.735  40 
   0   7   0 226.396 93.7136  21 
   0  -7   1 101120. 1875.35  40 
   0   7  -1 105294. 1425.24  37 
   0  -7  -1 110865. 2037.21  40 
   0  -7  -1 109098. 1395.60  24 
   0   7   1 110147. 1593.34  37 
   0   7  -1 106090. 1262.46   2 
   0   7   1 105472. 1360.94   2 
   0  -7   1 109203. 1420.70  24 
   0   7  -1 108907. 1393.26  21 
   0   7   1 108276. 1496.04  21 
   0  -7  -1 102130. 1411.95   1 
   0   7   2 2830.24 306.342  37 
   0   7  -2 2661.34 246.004  21 
   0   7   2 2687.54 219.721  38 
   0   7   2 2886.48 290.557  21 
   0  -7  -2 2745.45 342.017  40 
   0   7  -2 2526.74 247.272  37 
   0  -7  -2 3046.32 296.076   1 
   0  -7  -2 2626.04 247.453  24 
   0  -7   2 2489.39 204.980  38 
   0  -7   2 3035.41 262.259  23 
   0   7   2 2657.16 187.379  39 
   0   7   2 2806.83 202.797  23 
   0   7  -2 2859.10 227.698  36 
   0  -7  -2 2890.13 260.907  36 
   0  -7   2 2378.63 319.916  40 
   0  -7  -3 894860. 5385.17  40 
   0  -7   3 908338. 5396.33  40 
   0  -7  -3 956304. 5111.07  36 
   0   7   3 957571. 5366.26  37 
   0  -7  -3 940221. 4672.25  24 
   0   7  -3 950841. 4540.62  21 
   0  -7   3 946672. 5188.95  23 
   0  -7  -3 974131. 5483.04   1 
   0   7   3 939965. 3962.32  23 
   0   7   3 951795. 5120.38  22 
   0   7  -3 944062. 4396.96  37 
   0   7  -3 950555. 4452.10  36 
   0   7  -4 31611.8 868.732  37 
   0  -7  -4 32840.6 1047.77  40 
   0  -7   4 34193.1 997.624  40 
   0   7   4 30498.0 1017.60  22 
   0   7   4 34359.5 1032.14  38 
   0  -7  -4 32654.3 1041.25  36 
   0   7  -4 31787.1 912.319  21 
   0   7   4 32510.0 1029.86  37 
   0  -7  -4 30980.2 1057.69   1 
   0  -7   4 30915.3 1081.67  23 
   0   7  -4 30927.3 948.204  36 
   0   7   4 32942.1 819.010  23 
   0  -7   4 30313.4 1092.05  38 
   0  -7  -5 182161. 2631.68  36 
   0   7   5 185893. 2113.17  23 
   0  -7   5 164153. 2752.84  38 
   0  -7   5 171665. 2800.65  23 
   0   7  -5 175223. 2166.24  37 
   0  -7  -5 179164. 2676.13   1 
   0   7   5 182676. 2559.65  38 
   0   7  -5 170874. 2453.34  36 
   0   7   5 173010. 2513.20  22 
   0   7  -5 176346. 2366.12  21 
   0  -7  -5 182237. 2446.32  40 
   0  -7  -6 1083.15 279.157  36 
   0   7  -6 881.050 236.350  36 
   0   7  -6 1110.37 248.941  21 
   0   7   6 1283.58 208.466  23 
   0   7   6 1381.87 302.078  22 
   0  -7   6 1128.81 287.190  38 
   0   7   6 1166.85 250.097  38 
   0  -7   6 809.258 297.975  23 
   0   7  -6 1024.11 196.930  37 
   0  -7  -6 1178.71 280.699   1 
   0  -7   7 9149.56 779.389  23 
   0   7  -7 9160.40 694.787  36 
   0   7   7 11709.2 731.995  38 
   0  -7  -7 9834.76 708.534  36 
   0  -7   7 10567.8 804.880  38 
   0  -7  -7 10285.7 729.570   1 
   0   7   7 9469.31 687.350  22 
   0   7  -7 10134.7 676.953  21 
   0  -7  -8 2597.23 436.568  36 
   0   7  -8 2435.59 409.429  36 
   0   7   8 2134.58 379.289  22 
   0   7   8 2273.00 362.375  38 
   0  -7   8 2534.11 487.507  38 
   0  -7   8 1761.16 405.178  23 
   0   7  -8 2768.17 403.205  21 
   0  -7  -8 2336.81 401.022   1 
   0  -7  -9 2604.04 423.563   1 
   0   7   9 1918.01 385.366  22 
   0  -7  -9 3682.64 485.284  36 
   0   7   9 2796.47 423.341  34 
   0   7  -9 2104.91 401.578  17 
   0   7  -9 2668.95 438.843  36 
   0   7   9 2905.12 440.762  35 
   0  -7   9 1436.54 350.600  27 
   0   7   9 3131.31 439.607  38 
   0  -7   9 1920.38 414.639  23 
   0  -7  -9 2734.74 421.022  26 
   0   7   9 2838.45 427.185  16 
   0  -7  -9 3011.33 417.708  29 
   0  -7   9 2488.31 441.026  35 
   0  -7   9 1874.88 389.356   6 
   0   7  -9 2400.92 431.578  29 
   0  -7   9 2611.20 439.736  38 
   0   7  10 34.5860 231.099  35 
   0   7 -10-89.4439 267.353  29 
   0  -7  10-278.817 303.924  35 
   0   7 -10-144.238 239.661  17 
   0  -7 -10 3.99372 195.658  29 
   0   7  10-136.807 230.737  34 
   0   7  10 112.322 261.437  16 
   0  -7 -10 139.379 241.457  26 
   0  -7  10-57.8251 239.448  27 
   0   7  11 4438.09 512.210  35 
   0   7 -11 3592.37 502.350  17 
   0  -7 -11 4494.16 486.057  29 
   0   7  11 4218.13 483.401  34 
   0  -7  11 3732.02 508.325  27 
   0  -7  11 3664.22 517.774  35 
   0  -7  11 3342.63 498.064  16 
   0   7 -11 3567.87 492.477  29 
   0  -7 -11 4270.81 509.646  26 
   0   7  11 4893.59 523.877  16 
   0   7 -12 1729.80 360.816  17 
   0   7  12 1271.53 268.767  34 
   0  -7  12 1419.90 302.730  35 
   0  -7  12 1365.02 305.401  27 
   0   7  12 1496.10 316.862  16 
   0  -7  12 1284.28 370.090  16 
   0   7  12 1465.17 320.477  35 
   0   7 -12 1902.08 368.041  29 
   0  -7 -12 1293.07 304.123  26 
   0  -7 -12 1808.65 304.817  29 
   0   7  13-80.7667 137.537  34 
   0  -7  13 167.957 149.972  35 
   0   7 -13 246.107 202.079  29 
   0  -7  13 140.525 193.068  16 
   0   7  13 215.590 179.136  16 
   0  -7 -13 181.140 134.623  29 
   0  -7 -13 53.3788 171.210  26 
   0   7  13-165.589 189.733  35 
   0   7 -13-27.0619 154.407  17 
   0   8   0 5597.02 389.428  37 
   0  -8   0 5105.77 337.435  24 
   0   8   0 5378.77 320.304   2 
   0   8   0 5163.61 344.786  21 
   0  -8   0 6135.07 513.556  40 
   0   8   1 9465.50 516.660  37 
   0  -8   1 9392.30 627.557  40 
   0  -8  -1 10574.2 663.555  40 
   0   8  -1 9970.14 473.614  21 
   0   8   1 9678.98 442.986   2 
   0   8   1 9273.15 490.018  21 
   0  -8   1 10067.4 461.777  24 
   0  -8  -1 9110.02 459.405   1 
   0  -8  -1 9990.64 464.682  24 
   0   8  -1 10149.7 477.917  37 
   0   8  -1 9507.48 414.066   2 
   0  -8  -2 72681.0 1643.01  40 
   0  -8   2 74319.6 932.194  38 
   0  -8   2 71408.6 1351.16  24 
   0  -8  -2 73402.2 1274.02  36 
   0   8   2 71405.1 1497.65  37 
   0   8   2 74347.3 1018.26  38 
   0   8  -2 74739.6 1278.26  21 
   0  -8   2 71310.7 1652.95  40 
   0   8   2 73594.0 1008.26  23 
   0  -8  -2 73011.2 1422.86   1 
   0   8  -2 75362.9 1121.17  36 
   0   8   2 70462.5 1428.77  21 
   0   8  -2 71333.9 1174.74   2 
   0   8  -2 73051.7 1268.98  37 
   0  -8  -2 75016.9 1290.32  24 
   0   8   2 78173.2 1086.46  39 
   0  -8   3 26979.0 880.829  23 
   0  -8   3 25752.0 980.302  40 
   0  -8  -3 27088.8 966.882   1 
   0  -8  -3 25766.9 818.056  24 
   0  -8  -3 26566.2 860.004  36 
   0   8  -3 25767.4 803.178  21 
   0   8   3 27410.4 774.415  38 
   0  -8  -3 24143.4 942.115  40 
   0   8   3 27054.2 666.789  23 
   0   8   3 23636.1 440.471  39 
   0   8  -3 25834.7 783.646  37 
   0   8  -3 26336.2 760.874  36 
   0   8   3 25402.4 898.043  22 
   0   8   3 26668.0 954.622  37 
   0  -8   3 26266.4 801.326  38 
   0  -8  -4 593891. 4626.66  40 
   0  -8  -4 603252. 4752.88   1 
   0   8   4 581537. 4429.88  22 
   0   8  -4 586187. 3895.03  37 
   0   8   4 604991. 4575.41  37 
   0  -8   4 639927. 4587.40  40 
   0  -8   4 591674. 4569.49  38 
   0   8   4 621940. 3464.39  23 
   0  -8   4 587339. 4736.27  23 
   0   8  -4 586768. 4057.29  21 
   0  -8  -4 595651. 4402.06  36 
   0   8  -4 600959. 4104.98  36 
   0   8   5 10210.4 601.080  38 
   0   8   5 9337.28 638.710  22 
   0   8  -5 9552.45 583.413  21 
   0  -8  -5 9943.17 624.996  36 
   0  -8  -5 10090.5 674.459   1 
   0  -8   5 9276.32 656.261  38 
   0  -8   5 9406.29 698.239  23 
   0   8  -5 8684.11 576.451  36 
   0  -8  -5 9704.94 607.087  40 
   0   8   5 10253.1 493.103  23 
   0   8  -5 9257.43 529.849  37 
   0  -8  -6 14233.5 791.782  36 
   0  -8   6 14303.9 874.058  38 
   0   8  -6 14102.5 798.373  36 
   0  -8  -6 16914.6 897.740   1 
   0   8  -6 15578.7 793.504  21 
   0  -8   6 14552.4 921.035  23 
   0   8   6 16000.7 804.913  38 
   0  -8  -6 15947.9 766.923  40 
   0   8   6 15539.7 828.108  22 
   0   8   7 1146.85 281.170  22 
   0  -8   7 1087.01 331.745  23 
   0  -8  -7 1263.98 309.278   1 
   0   8  -7 1094.08 308.516  36 
   0   8   7 1264.41 283.026  38 
   0  -8   7 1065.33 285.797  38 
   0   8  -7 934.392 258.971  21 
   0  -8  -7 1110.45 309.076  36 
   0  -8   8 24654.2 1303.52  23 
   0   8  -8 29653.0 1221.01  21 
   0  -8   8 28403.4 1347.92  38 
   0  -8  -8 27876.4 1240.82   1 
   0   8   8 26062.0 1182.61  22 
   0   8   8 30935.8 1234.53  38 
   0   8  -8 27368.5 1235.93  36 
   0  -8  -8 26992.4 1179.30  36 
   0  -8   9-88.0018 226.798  35 
   0  -8  -9 126.418 218.423  26 
   0  -8   9 35.0464 219.235  27 
   0  -8   9 154.879 226.377  38 
   0   8   9 380.836 234.995  35 
   0   8   9 51.8881 159.471  22 
   0   8   9 110.444 184.989  34 
   0  -8   9-3.96775 229.636   6 
   0  -8  -9 584.002 284.710  36 
   0  -8  -9 396.293 229.438  29 
   0  -8   9 21.2186 265.525  23 
   0   8  -9 33.4916 228.355  29 
   0   8  -9 175.146 148.062  36 
   0  -8  -9 175.284 207.690   1 
   0   8   9 272.160 272.759  16 
   0   8   9 163.839 193.568  38 
   0  -8  10 2343.80 425.164  35 
   0   8  10 3051.92 437.949  34 
   0  -8  10 2858.96 469.778  27 
   0   8  10 2855.56 445.632  16 
   0   8  10 2905.38 445.981  35 
   0   8 -10 2781.66 468.873  17 
   0   8 -10 2842.47 479.372  29 
   0  -8 -10 2941.00 416.586  29 
   0  -8 -10 3444.48 482.290  26 
   0  -8  11 500.974 288.871  27 
   0  -8 -11 889.194 316.714  26 
   0   8  11 865.891 326.212  16 
   0  -8 -11 406.600 206.756  29 
   0   8 -11 550.030 277.681  29 
   0   8  11 691.044 289.184  35 
   0  -8  11 700.569 282.915  35 
   0   8  11 670.021 257.273  34 
   0   8 -11 223.356 287.034  17 
   0   8  12 1546.16 294.792  34 
   0  -8  12 1026.24 318.800  16 
   0   8 -12 1602.29 341.700  17 
   0  -8  12 1386.44 324.866  27 
   0   8  12 1414.07 322.860  35 
   0  -8 -12 1736.98 286.898  29 
   0  -8  12 1350.58 291.663  35 
   0   8  12 1751.80 321.367  16 
   0  -8 -12 1576.06 318.465  26 
   0   8 -12 1362.22 326.198  29 
   0   8  13 306.238 167.830  16 
   0   8 -13 188.453 176.881  17 
   0  -8  13 355.440 212.637  16 
   0  -8  13 303.970 151.010  27 
   0  -8 -13 210.398 147.180  29 
   0   8  13 398.574 171.404  34 
   0  -8  13 281.232 159.986  35 
   0   8  13 312.261 186.288  35 
   0  -8 -13 220.799 175.584  26 
   0   8 -13 279.021 201.515  29 
   0   9   0 59.7640 113.609  21 
   0   9   0 160.216 108.184   2 
   0  -9   0 187.228 49.2837  25 
   0   9   0 207.805 146.303  37 
   0  -9   0 108.335 124.705  24 
   0  -9   0 249.443 215.025  40 
   0   9   1 205.377 110.485   2 
   0   9  -1 373.197 136.458  21 
   0  -9   1 267.127 132.651  24 
   0  -9  -1 253.807 142.762  24 
   0  -9   1 172.644 181.499  40 
   0   9  -1 246.707 109.348   2 
   0  -9  -1 193.065 201.006  40 
   0   9   1 304.136 150.636  37 
   0   9   1 312.628 147.801  21 
   0  -9  -1 378.256 141.167   1 
   0   9  -1 364.822 137.262  37 
   0   9   2 640.221 183.506  21 
   0   9   2 797.271 136.793  39 
   0   9   2 927.751 103.981  38 
   0   9   2 810.199 218.070  37 
   0   9  -2 913.925 184.849  21 
   0  -9   2 804.634 90.1313  38 
   0  -9  -2 843.940 161.408  36 
   0  -9  -2 843.318 187.529  24 
   0   9  -2 978.954 184.356  37 
   0   9   2 726.656 120.190  23 
   0   9  -2 866.060 170.735   2 
   0  -9   2 829.582 197.961  24 
   0  -9   2 889.787 218.318  40 
   0  -9  -2 994.925 265.898  40 
   0  -9  -2 907.700 203.075   1 
   0  -9  -3 255853. 3132.26  40 
   0  -9   3 289790. 3386.54  40 
   0  -9  -3 280182. 2806.58  36 
   0  -9  -3 279274. 3160.38   1 
   0   9  -3 274008. 2783.25  21 
   0   9   3 278434. 3156.24  37 
   0   9   3 286399. 2131.14  23 
   0   9   3 293667. 2414.77  38 
   0   9  -3 285785. 2552.68  36 
   0  -9   3 276683. 2852.00  23 
   0   9   3 281174. 3021.10  22 
   0   9  -3 268510. 2684.46  37 
   0  -9   3 295042. 2456.74  38 
   0  -9  -3 285037. 2831.78  24 
   0  -9   4 3675.29 350.149  38 
   0   9   4 4360.22 349.659  38 
   0  -9   4 3800.01 394.687  40 
   0   9  -4 3806.68 342.164  37 
   0   9  -4 3770.54 348.296  36 
   0   9   4 3519.63 408.950  37 
   0  -9  -4 4302.98 399.815  36 
   0  -9  -4 3692.35 409.738  40 
   0   9   4 3988.81 421.254  22 
   0  -9   4 4094.22 427.399  23 
   0  -9  -4 4900.63 472.750   1 
   0   9  -4 4597.16 396.178  21 
   0   9  -5 341278. 3500.26  36 
   0   9  -5 343772. 3505.21  21 
   0  -9   5 339264. 4022.82  23 
   0  -9   5 357037. 3891.18  38 
   0   9  -5 352225. 3298.52  37 
   0  -9  -5 365557. 3821.03  40 
   0  -9  -5 354323. 3648.84  36 
   0   9   5 338745. 3724.60  37 
   0   9   5 340248. 3714.31  22 
   0  -9  -5 339218. 3868.84   1 
   0  -9  -6 415.437 230.635   1 
   0   9  -6 354.500 191.513  36 
   0  -9   6 281.556 223.780  23 
   0   9   6 478.645 198.427  38 
   0  -9  -6 450.461 194.132  40 
   0   9  -6 379.834 191.316  21 
   0  -9  -6 154.607 178.499  36 
   0   9   6 499.899 233.218  22 
   0  -9   6 482.991 225.445  38 
   0   9   7 15987.8 853.079  38 
   0   9  -7 13541.6 843.557  36 
   0  -9   7 14275.3 914.370  38 
   0   9  -7 13764.0 821.894  21 
   0  -9   7 12430.3 922.713  23 
   0  -9  -7 13288.0 847.414   1 
   0   9   7 13144.3 807.196  22 
   0  -9  -7 13014.9 810.911  36 
   0  -9   8 1398.30 337.020  38 
   0  -9  -8 2421.01 442.619  36 
   0   9  -8 1410.13 312.782  21 
   0  -9  -8 1895.84 383.263   1 
   0   9   8 1793.88 356.513  22 
   0   9  -8 1416.12 352.459  36 
   0  -9   8 1434.98 373.402  23 
   0   9   8 1723.47 316.408  38 
   0   9  -9 224.888 238.663  29 
   0   9  -9 241.903 203.492  36 
   0  -9   9 214.780 236.976  35 
   0   9   9 374.407 260.677  16 
   0   9   9 299.955 211.000  35 
   0  -9  -9 166.588 197.501  29 
   0   9   9 167.989 162.894  28 
   0  -9  -9 227.035 209.508  26 
   0  -9  -9 461.735 256.966   1 
   0   9   9 154.178 180.421  22 
   0  -9   9 173.297 241.347   6 
   0  -9   9 379.233 277.270  27 
   0  -9   9-211.575 282.898  23 
   0   9   9 177.888 235.918  34 
   0  -9 -10-211.682 229.722  29 
   0  -9  10-14.3400 250.997  27 
   0   9  10 63.8477 223.696  35 
   0  -9  10-327.057 255.960  35 
   0   9  10-94.4114 257.499  16 
   0   9  10 99.2505 235.075  34 
   0  -9 -10 91.7100 275.266  26 
   0   9 -10-176.000 299.184  17 
   0   9 -10-179.028 278.240  29 
   0  -9 -11 1773.59 362.073  26 
   0   9 -11 1540.82 378.601  29 
   0   9  11 1299.87 307.560  35 
   0  -9  11 1447.36 398.229  27 
   0   9  11 1351.63 307.197  34 
   0   9  11 1522.88 354.233  16 
   0  -9  11 1394.34 340.085  35 
   0   9 -11 949.552 315.612  17 
   0  -9 -11 1917.53 331.425  29 
   0   9 -12 433.959 259.520  29 
   0   9  12 653.489 250.882  35 
   0  -9  12 574.367 251.630  27 
   0  -9  12 164.141 262.023  16 
   0   9  12 740.613 262.295  16 
   0  -9 -12 515.012 239.575  26 
   0  -9 -12 585.240 201.835  29 
   0   9 -12 433.050 242.127  17 
   0  -9  12 613.253 227.209  35 
   0   9  12 562.188 217.504  34 
   0  -9 -13 156.554 176.171  26 
   0   9 -13-32.4281 176.302  29 
   0  -9  13 70.6466 109.146  35 
   0   9  13-20.9643 132.381  30 
   0  -9  13-40.3756 180.577  16 
   0  -9  13-86.7530 160.516  27 
   0   9  13 233.143 136.330  34 
   0   9 -13 60.3253 156.780  17 
   0  -9 -13 167.255 111.714  29 
   0   9  13-27.7385 160.647  35 
   0  10   0 8084.21 428.450   2 
   0  10   0 8193.66 493.791  21 
   0  10   0 8784.11 535.152  37 
   0 -10   0 7328.71 465.159  24 
   0 -10   0 9190.66 660.915  40 
   0 -10   1 11519.1 739.533  40 
   0  10   1 11257.1 599.000  21 
   0 -10  -1 10779.8 555.814   1 
   0 -10  -1 11987.8 737.578  40 
   0  10   1 10990.0 624.182  37 
   0  10   1 11149.2 541.271   2 
   0  10  -1 11406.6 570.905  21 
   0 -10  -1 10702.8 553.953  24 
   0 -10   1 9993.61 536.358  24 
   0  10  -1 11159.7 570.982  37 
   0  10  -1 10867.0 494.940   2 
   0 -10  -2 45291.8 1224.67   1 
   0  10  -2 47051.3 1178.21  37 
   0  10  -2 48932.5 1169.83  21 
   0  10   2 47754.4 1278.20  21 
   0 -10  -2 45007.8 1387.92  40 
   0 -10  -2 48674.1 1074.91  36 
   0 -10   2 46156.6 1173.13  24 
   0 -10  -2 46837.6 1162.29  24 
   0  10  -2 46271.4 1048.65   2 
   0 -10   2 49207.6 1487.10  40 
   0  10   2 44987.1 1314.52  37 
   0  10   2 48964.2 1005.42  39 
   0 -10  -3 12638.4 636.722  24 
   0  10  -3 12464.8 565.485  36 
   0 -10  -3 13330.5 730.500   1 
   0 -10   3 12370.0 672.084  24 
   0  10   3 12302.5 701.019  37 
   0 -10  -3 11243.1 690.884  40 
   0  10  -3 12489.9 632.152  21 
   0  10  -3 12739.5 606.476   2 
   0  10   3 13443.8 704.336  22 
   0  10  -3 11958.1 606.940  37 
   0 -10  -3 13062.9 615.172  36 
   0 -10   3 12254.1 736.470  40 
   0  10  -4 215625. 2643.16  37 
   0  10  -4 210755. 2717.31  21 
   0 -10  -4 208655. 2966.86  40 
   0 -10  -4 220243. 3049.10   1 
   0 -10   4 210898. 2888.86  23 
   0  10   4 215792. 2857.46  22 
   0  10  -4 220024. 2590.20  36 
   0 -10   4 232529. 2570.57  38 
   0 -10  -4 219308. 2670.64  36 
   0 -10  -4 222029. 2686.92  24 
   0  10   4 222064. 3013.55  37 
   0 -10  -5 2704.73 386.232   1 
   0 -10   5 2548.32 346.484  38 
   0  10  -5 2611.05 352.886  36 
   0  10  -5 2495.10 314.227  37 
   0  10   5 2327.39 352.943  37 
   0  10   5 2584.66 298.901  38 
   0 -10  -5 2402.59 318.942  36 
   0 -10  -5 2438.06 352.208  40 
   0 -10   5 2387.41 374.264  23 
   0  10  -5 2366.18 345.458  21 
   0  10   5 2202.38 349.777  22 
   0 -10   6 2550.14 423.613  23 
   0 -10  -6 3368.33 437.683   1 
   0  10   6 3093.71 429.328  22 
   0 -10  -6 2833.90 383.051  36 
   0 -10  -6 3296.55 409.507  40 
   0  10  -6 2936.18 392.890  21 
   0  10  -6 2702.19 392.447  36 
   0 -10   7 4326.32 580.948  23 
   0  10   7 4881.14 516.223  22 
   0  10  -7 4979.80 522.046  21 
   0 -10  -7 4658.86 529.817   1 
   0  10  -7 4662.94 529.729  36 
   0 -10  -7 4743.04 502.849  36 
   0 -10  -8-15.6130 195.757   1 
   0  10   8 12.5392 171.968  22 
   0 -10  -8-39.9367 223.628  26 
   0  10   8 182.467 222.693  16 
   0  10  -8 320.497 264.408  29 
   0  10   8 176.806 238.760  34 
   0 -10   8 238.783 272.039  27 
   0 -10  -8 70.3150 188.800  29 
   0  10   8 250.123 229.400  35 
   0 -10   8 264.410 218.805   6 
   0 -10   8-345.895 297.515  23 
   0  10   8 162.079 185.498  28 
   0  10  -8 243.164 241.482  36 
   0  10  -8-53.6005 221.737  20 
   0 -10   8 136.071 218.708  32 
   0 -10   9 364.765 265.251  35 
   0  10   9 407.193 273.165  16 
   0 -10  -9 425.776 208.372  29 
   0  10   9 494.106 219.461  28 
   0  10   9 523.257 279.528  35 
   0 -10   9 670.443 318.731  27 
   0  10  -9 498.946 290.743  20 
   0  10   9 572.138 276.095  34 
   0 -10  -9 570.135 251.841  26 
   0 -10   9 373.964 279.486   6 
   0  10  -9 465.563 305.285  29 
   0  10  10 1678.21 347.443  34 
   0 -10 -10 1607.63 323.600  29 
   0 -10 -10 1801.23 373.161  26 
   0  10 -10 1381.35 393.316  17 
   0  10  10 2008.34 366.809  35 
   0  10  10 1824.14 372.160  16 
   0 -10  10 2438.99 451.192  27 
   0 -10  10 1277.94 325.308  35 
   0  10 -10 1623.15 410.304  29 
   0 -10 -11 124.084 214.688  26 
   0 -10  11 304.400 223.162  35 
   0  10 -11 19.6672 267.679  29 
   0 -10  11 321.374 288.263  27 
   0  10  11-106.117 238.184  35 
   0 -10 -11 160.104 179.109  29 
   0  10  11 73.0661 214.105  34 
   0  10 -11 101.552 257.529  17 
   0  10  11 234.560 247.676  16 
   0 -10  12-42.2940 193.549  27 
   0  10 -12 362.931 234.875  17 
   0  10  12 129.295 187.730  34 
   0 -10  12-169.874 162.880  35 
   0 -10  12-20.5657 263.238  16 
   0 -10 -12 255.219 217.897  26 
   0 -10 -12-137.803 148.795  29 
   0  10  12 92.3504 206.356  35 
   0  10  12 151.850 214.930  16 
   0  10 -12-11.1368 253.132  29 
   0  10 -13 666.071 191.099  17 
   0  10 -13 707.071 208.190  29 
   0 -10  13 578.794 170.682  27 
   0  10  13 714.675 185.212  35 
   0 -10  13 932.931 218.682  16 
   0 -10  13 745.844 149.405  35 
   0  10  13 437.570 133.014  30 
   0  10  13 969.436 188.445  34 
   0 -10 -13 1141.38 221.245  26 
   0  11   0 125.766 158.828  37 
   0 -11   0 23.6595 124.648  24 
   0 -11   0 59.4047 201.762  40 
   0  11   0 11.1909 106.045   2 
   0  11   0 86.5099 132.589  21 
   0  11   1 3559.68 337.522   2 
   0 -11   1 3125.82 343.581  24 
   0  11  -1 4067.77 333.146   2 
   0  11  -1 3964.73 383.200  37 
   0 -11  -1 3667.23 451.791  40 
   0 -11  -1 3636.04 355.059  24 
   0 -11  -1 3929.16 364.706   1 
   0  11  -1 3310.48 347.987  21 
   0  11   1 3271.22 387.092  37 
   0  11   1 4138.45 395.276  21 
   0  11   1 3834.29 352.138  39 
   0  11  -2 122.964 141.579  21 
   0 -11  -2 92.3505 136.379  24 
   0  11  -2 120.262 123.986   2 
   0 -11  -2 89.7808 194.717  40 
   0  11  -2 50.9084 125.096  37 
   0 -11  -2 27.4096 93.7606  36 
   0 -11   2 86.5983 147.411  24 
   0 -11   2 152.496 216.967  40 
   0  11   2 88.8793 145.592  21 
   0  11   2-133.391 198.632  37 
   0  11   2 196.324 115.817  39 
   0 -11  -2 170.222 160.513   1 
   0  11  -3 3016.09 330.547  37 
   0  11  -3 3378.51 370.515  21 
   0 -11  -3 2649.30 354.456   1 
   0 -11  -3 3212.52 364.587  24 
   0  11   3 3051.81 388.702  22 
   0 -11  -3 3330.41 325.395  36 
   0  11   3 3409.44 407.350  37 
   0 -11   3 3993.38 483.404  40 
   0 -11  -3 4287.35 461.984  40 
   0  11  -3 3245.72 333.225   2 
   0 -11   3 2868.85 357.703  24 
   0 -11  -4 42927.0 1243.33  24 
   0  11  -4 39071.5 1231.66  21 
   0  11   4 39537.0 1318.22  37 
   0  11  -4 41580.6 1164.85  36 
   0  11  -4 40444.3 1201.17  37 
   0 -11  -4 38837.0 1329.43   1 
   0 -11  -4 42185.8 1176.17  36 
   0  11  -4 40311.3 1186.10   2 
   0  11   4 40508.8 1289.36  22 
   0 -11  -4 38068.0 1312.79  40 
   0 -11   4 40780.4 1338.20  24 
   0 -11   4 45427.5 1410.20  40 
   0 -11   5 5842.83 583.531  24 
   0  11  -5 6368.84 515.677  37 
   0 -11  -5 7486.86 529.505  36 
   0  11  -5 5764.99 520.122  21 
   0 -11  -5 6534.57 589.686   1 
   0  11  -5 7093.24 555.592  36 
   0  11   5 5754.27 546.837  37 
   0 -11  -5 6860.86 580.577  40 
   0  11   5 5861.39 535.529  22 
   0  11   6 180.461 194.306  22 
   0  11  -6 285.118 192.354  21 
   0 -11  -6 179.449 164.274  40 
   0 -11  -6 362.036 243.515   1 
   0  11  -6 278.172 172.564  36 
   0  11  -7 67.9135 174.974  21 
   0 -11  -7 172.637 222.621   1 
   0  11  -7 5.97854 201.245  36 
   0  11   7 1.52079 180.321  22 
   0 -11   8 1053.19 324.691   9 
   0 -11   8 1370.25 328.192   6 
   0 -11   8 1101.10 309.663  35 
   0  11   8 1106.60 308.798  22 
   0 -11   8 817.012 266.426  32 
   0  11  -8 1383.98 323.344  36 
   0  11   8 1459.89 345.285  34 
   0 -11   8 1240.60 367.281  27 
   0  11   8 1223.76 290.339  28 
   0  11  -8 1453.56 360.289  20 
   0 -11  -8 1423.53 332.453  26 
   0 -11   8 1599.87 426.859  24 
   0 -11  -8 1197.60 309.809   1 
   0 -11  -8 1057.36 289.134  29 
   0  11   8 1356.73 299.092  35 
   0  11   8 1565.43 351.090  16 
   0  11  -8 1349.80 378.767  29 
   0 -11  -9 601.197 269.226  26 
   0  11   9 861.144 269.314  28 
   0  11   9 656.449 252.754  34 
   0 -11   9 361.388 231.889  35 
   0 -11   9 625.811 322.760  27 
   0  11  -9 674.064 347.917  20 
   0  11  -9 610.432 320.109  29 
   0  11   9 644.012 281.400  16 
   0 -11   9 412.291 255.843   6 
   0 -11  -9 454.940 212.211  29 
   0  11   9 739.971 276.563  35 
   0 -11  10-96.2843 322.589  27 
   0  11  10 130.884 214.503  34 
   0 -11  10-105.320 286.874  35 
   0  11  10-12.5958 230.228  28 
   0  11 -10-320.270 344.876  17 
   0  11  10 353.585 263.950  16 
   0 -11 -10-134.775 230.311  29 
   0  11  10 61.3736 216.346  35 
   0 -11 -10-4.04865 241.268  26 
   0  11 -10 137.714 275.940  29 
   0  11  11 357.864 267.576  16 
   0 -11  11 228.626 214.440  35 
   0  11  11-65.2585 248.051  35 
   0 -11 -11 56.9092 241.395  26 
   0  11 -11 205.827 274.389  17 
   0 -11  11 116.442 265.372  27 
   0 -11 -11 237.467 173.951  29 
   0  11 -11 36.4584 276.214  29 
   0  11  11 289.641 220.920  34 
   0  11 -12 32.9684 227.874  17 
   0 -11  12 164.093 229.524  27 
   0 -11 -12 433.503 225.543  26 
   0  11  12 196.342 178.494  34 
   0 -11  12 283.873 157.078  35 
   0 -11  12 26.2827 224.895  16 
   0  11  12 38.9828 141.485  30 
   0  11  12 101.188 181.898  35 
   0 -11 -12 325.748 163.764  29 
   0  11 -12 228.933 230.853  29 
   0  11  13 1221.86 205.629  35 
   0  11 -13 1158.48 215.613  17 
   0  11  13 1366.77 193.802  34 
   0  11  13 1017.19 150.304  30 
   0 -11  13 1368.76 240.678  16 
   0 -11  13 945.455 181.689  27 
   0  11 -13 1138.35 219.682  29 
   0 -11 -13 1621.04 237.864  26 
   0  12   0 10054.0 541.628   2 
   0 -12   0 9325.20 555.814  24 
   0 -12   0 11203.5 760.165  40 
   0  12   0 10219.7 609.797  21 
   0  12   0 10326.3 648.102  37 
   0  12  -1 544.001 218.032  37 
   0 -12   1 855.230 284.261  40 
   0 -12  -1 645.953 191.047  24 
   0 -12   1 669.614 209.444  24 
   0 -12  -1 764.350 286.373  40 
   0  12  -1 737.387 202.695  21 
   0  12   1 676.244 221.932  37 
   0  12   1 834.907 202.933  39 
   0  12   1 717.043 217.284  21 
   0  12  -1 936.495 192.247   2 
   0 -12  -1 960.035 223.929   1 
   0 -12  -2 1620.32 273.434  24 
   0  12  -2 1396.19 267.359  37 
   0  12  -2 1662.59 279.200  21 
   0 -12   2 2166.06 370.609  40 
   0  12  -2 1836.00 253.043   2 
   0 -12   2 1782.80 291.139  24 
   0  12   2 1411.53 285.443  37 
   0  12   2 1451.96 209.028  39 
   0 -12  -2 1749.66 299.023   1 
   0 -12  -2 1965.40 330.689  40 
   0  12   2 1504.53 289.512  21 
   0  12  -3 11014.6 669.275  37 
   0 -12  -3 10997.0 723.483  40 
   0  12  -3 11680.9 622.440   2 
   0 -12  -3 10963.2 713.952   1 
   0 -12   3 13227.7 837.058  40 
   0  12   3 10667.9 726.649  37 
   0 -12  -3 12446.0 690.361  24 
   0  12   3 10920.5 708.932  22 
   0 -12   3 10970.3 687.482  24 
   0  12  -3 11627.1 680.867  21 
   0  12  -4 109457. 2060.25  37 
   0  12   4 106927. 2197.16  22 
   0 -12   4 124343. 2431.95  40 
   0  12   4 107732. 2227.72  37 
   0  12  -4 117420. 2073.26   2 
   0 -12   4 106291. 2232.48  24 
   0 -12  -4 110365. 2281.92   1 
   0 -12  -4 120890. 2151.33  24 
   0 -12  -4 105414. 2234.09  40 
   0  12  -4 108614. 2109.99  21 
   0  12  -5 20952.2 951.507   2 
   0 -12  -5 20231.7 1003.58  40 
   0  12   5 19602.2 991.651  37 
   0  12  -5 21136.9 927.963  37 
   0 -12  -5 19525.6 1001.27   1 
   0 -12   5 19795.1 1044.07  24 
   0  12   5 21225.7 997.477  22 
   0  12  -5 20228.2 977.878  21 
   0  12  -5 21222.1 957.318  36 
   0 -12   6 312.846 253.256  24 
   0 -12  -6 565.064 236.502   1 
   0  12  -6 759.741 242.695   2 
   0 -12  -6 24.3432 195.569  40 
   0  12  -6 336.570 195.477  36 
   0  12   6 632.781 251.588  22 
   0  12  -6 409.202 210.941  21 
   0  12   7 306.613 205.999  22 
   0 -12   7-76.0854 266.641  24 
   0  12  -7 350.471 187.631  21 
   0  12  -7 145.681 210.362  36 
   0 -12  -7 206.045 226.011   1 
   0 -12  -8 2155.81 383.915  26 
   0 -12   8 1918.59 408.780   9 
   0  12  -8 2119.95 454.337  29 
   0 -12   8 1714.83 373.832   6 
   0  12  -8 1954.52 432.629  20 
   0 -12   8 2157.58 388.711  32 
   0  12   8 2374.74 419.312  16 
   0 -12   8 2540.78 502.075  27 
   0 -12  -8 2055.23 403.514   1 
   0  12   8 2100.12 383.955  35 
   0 -12   8 1595.32 410.399  24 
   0  12  -8 2487.67 416.765  36 
   0 -12  -8 2701.70 407.196  29 
   0  12   8 1937.90 374.487  28 
   0  12   8 2480.08 409.062  34 
   0  12   8 1470.46 316.555  22 
   0 -12   9 52.5186 279.244  27 
   0  12   9 282.236 231.461  34 
   0 -12   9-270.939 310.081   6 
   0  12  -9 351.239 293.447  20 
   0 -12   9 211.277 212.912  35 
   0  12   9 52.4532 243.657  16 
   0 -12  -9-59.8617 214.274  26 
   0  12  -9 133.652 275.850  29 
   0  12   9 29.5916 196.519  28 
   0  12   9 150.428 231.502  35 
   0 -12  -9 222.124 216.812  29 
   0  12  10 320.230 236.874  35 
   0  12 -10 370.121 306.065  29 
   0 -12 -10 142.813 239.782  26 
   0 -12  10-40.0052 230.096  35 
   0  12 -10-184.582 317.538  17 
   0  12  10 324.384 238.559  34 
   0 -12 -10-61.2620 198.867  29 
   0 -12  10 402.682 288.095  27 
   0  12 -10 267.565 234.439  20 
   0  12  10 664.433 254.959  28 
   0  12  10 406.078 274.126  16 
   0  12  11 867.695 274.355  34 
   0 -12 -11 777.922 291.053  26 
   0  12  11 352.459 228.021  35 
   0 -12  11 556.999 224.934  35 
   0 -12  11 367.195 266.972  27 
   0  12 -11 605.038 289.909  29 
   0  12 -11 637.004 304.759  17 
   0  12  11 629.213 200.971  30 
   0 -12 -11 393.939 197.610  29 
   0  12  12 17.8947 137.187  30 
   0 -12 -12 177.485 198.090  26 
   0 -12  12-300.407 272.401  16 
   0 -12  12 16.1526 188.811  27 
   0  12  12 177.470 173.103  34 
   0  12 -12 133.158 199.820  17 
   0  12  12-78.8514 183.067  35 
   0  12 -12-91.6457 220.209  29 
   0  13   0 106.173 166.168  21 
   0  13   0-53.6597 150.488   2 
   0  13   0 193.070 173.081  37 
   0 -13   0 11.9784 191.145  40 
   0 -13   0 73.0673 153.644  24 
   0  13  -1 49663.7 1360.50  21 
   0  13   1 47441.6 1307.01  39 
   0  13  -1 48387.4 1201.59   2 
   0 -13   1 46766.7 1301.90  24 
   0 -13  -1 45372.8 1479.77  40 
   0  13   1 47424.5 1411.84  21 
   0 -13  -1 48696.0 1323.40  24 
   0 -13  -1 47374.3 1313.83   1 
   0  13  -1 47645.2 1385.94  37 
   0 -13   1 50554.5 1672.01  40 
   0  13   1 44217.0 1425.61  37 
   0 -13   2 7630.96 572.611  24 
   0 -13   2 8846.73 728.727  40 
   0  13   2 7180.46 582.270  21 
   0  13  -2 7861.66 569.374  21 
   0  13  -2 6923.04 482.341   2 
   0  13  -2 7811.53 586.460  37 
   0 -13  -2 8187.84 631.698  40 
   0  13   2 7333.12 605.888  37 
   0 -13  -2 8173.21 568.317  24 
   0 -13  -2 7273.56 572.825   1 
   0  13   3 302.123 193.077  37 
   0 -13  -3 486.717 212.534   1 
   0 -13  -3 309.971 202.411  40 
   0  13   3 294.492 191.975  22 
   0  13  -3 219.963 144.199  37 
   0 -13   3 541.011 244.094  40 
   0  13  -3 490.845 195.984  21 
   0 -13  -3 99.9812 154.684  24 
   0  13  -3 333.530 160.026   2 
   0 -13   3 449.780 224.261  24 
   0  13   4 9185.28 691.944  37 
   0  13   4 9665.44 684.958  22 
   0 -13  -4 10998.2 701.025  24 
   0  13  -4 8735.55 628.084  37 
   0 -13  -4 9029.34 688.146  40 
   0  13  -4 9830.07 677.690  21 
   0  13  -4 10832.7 674.661   2 
   0 -13   4 9439.89 701.411  24 
   0 -13  -4 10394.2 731.202   1 
   0 -13   4 10170.5 727.934  40 
   0 -13  -5 24567.8 1139.29   1 
   0 -13  -5 25883.0 1154.12  40 
   0  13   5 25598.6 1163.86  37 
   0  13  -5 27922.6 1141.58   2 
   0  13  -5 26421.9 1151.40  21 
   0  13   5 25363.0 1152.98  22 
   0 -13   5 24535.9 1192.93  24 
   0  13  -5 27513.0 1093.83  37 
   0 -13  -6 5105.56 551.950   1 
   0 -13  -6 5228.19 543.783  40 
   0  13   6 5119.51 554.830  22 
   0 -13   6 5273.10 612.608  24 
   0  13  -6 5439.22 558.532   2 
   0  13  -6 5301.84 560.536  21 
   0  13  -7 432.452 241.979   2 
   0 -13  -7 317.623 214.607   1 
   0  13   7 569.891 270.184  22 
   0  13  -7 396.155 217.011  36 
   0  13   7 162.326 196.659  34 
   0  13  -7 377.559 219.656  21 
   0  13   7-42.0026 205.927  30 
   0 -13   7 325.972 221.267   6 
   0 -13   7 379.741 211.961  32 
   0  13   7 406.292 273.161  16 
   0 -13   7 365.374 281.081   9 
   0  13   7 303.153 231.535  28 
   0 -13   7 554.300 295.206  24 
   0 -13  -7 453.027 261.219  26 
   0 -13   7 624.727 299.523  27 
   0  13   7 190.848 156.160  35 
   0  13   8 2680.93 401.553  30 
   0 -13   8 2165.32 443.744   9 
   0 -13   8 2723.86 514.758  27 
   0  13  -8 2621.46 491.690  29 
   0 -13   8 2013.96 378.702   6 
   0  13  -8 2496.44 486.030  20 
   0 -13   8 2618.39 444.135  32 
   0  13   8 2561.22 403.278  28 
   0  13   8 2649.89 437.468  34 
   0  13   8 2476.19 403.179  35 
   0  13   8 2762.01 466.748  16 
   0 -13  -8 2348.74 422.201  26 
   0 -13  -8 2958.57 427.918  29 
   0 -13   9-391.143 336.885  27 
   0  13  -9-119.452 280.866  20 
   0 -13   9-91.0670 252.505   6 
   0  13   9-89.0213 276.854  16 
   0  13   9 92.8297 196.444  28 
   0 -13  -9-166.786 273.465  26 
   0  13   9-38.4617 247.653  34 
   0  13   9-37.9055 196.286  30 
   0  13   9 131.182 225.056  35 
   0 -13  -9 173.598 220.862  29 
   0  13  -9 47.0980 275.196  29 
   0  13 -10 424.919 317.451  29 
   0  13 -10 55.8197 230.891  20 
   0  13  10 309.437 198.418  30 
   0  13 -10 527.178 356.523  17 
   0  13  10 487.780 241.549  28 
   0 -13 -10 54.8998 181.335  29 
   0 -13  10 84.8501 279.584  27 
   0 -13 -10 307.886 228.860  26 
   0  13  10 494.322 258.114  35 
   0  13  10 315.726 239.317  34 
   0  13  11 443.559 214.371  35 
   0  13 -11 333.379 252.803  29 
   0  13  11 561.605 247.181  34 
   0  13  11 338.429 173.286  30 
   0 -13  11 326.058 252.045  27 
   0 -13 -11 680.906 283.914  26 
   0  13 -11 297.372 275.483  17 
   0 -13  12 3224.56 400.568  16 
   0 -13  12 3425.26 396.619  27 
   0 -13 -12 3575.68 370.462  26 
   0  13 -12 3482.36 392.448  17 
   0  13 -12 4005.24 417.484  29 
   0  13  12 3380.87 343.453  35 
   0  13  12 3840.17 355.383  34 
   0  13  12 3445.57 295.476  30 
   0 -14   0 149520. 2354.95  24 
   0  14   0 143764. 2560.11  37 
   0  14   0 152671. 2515.19  21 
   0 -14   0 143151. 2286.89   1 
   0  14   0 149125. 2262.60   2 
   0 -14   0 147354. 2782.66  40 
   0 -14  -1 4959.99 460.342  24 
   0  14   1 4894.62 516.569  37 
   0 -14   1 5834.04 595.858  40 
   0  14  -1 5297.71 436.581   2 
   0  14  -1 4741.05 498.590  37 
   0  14  -1 4578.31 490.935  21 
   0 -14  -1 4861.39 525.568  40 
   0  14   1 5049.01 455.441  39 
   0 -14   1 5577.93 493.529  24 
   0 -14  -1 5446.07 489.085   1 
   0  14   1 5448.64 516.470  21 
   0 -14  -2 14506.4 810.338   1 
   0  14  -2 14987.8 800.191  21 
   0 -14  -2 15873.9 823.713  24 
   0 -14   2 15892.1 956.099  40 
   0 -14   2 14627.0 812.692  24 
   0  14  -2 13594.1 806.551  37 
   0  14   2 12599.7 815.398  37 
   0  14  -2 15100.0 728.809   2 
   0  14   2 14287.8 841.458  21 
   0 -14  -2 13154.4 822.294  40 
   0  14  -3 636.087 239.379  37 
   0  14  -3 611.311 211.900  21 
   0 -14  -3 884.021 270.139  40 
   0 -14   3 519.512 251.852  24 
   0  14  -3 520.618 186.005   2 
   0 -14  -3 645.024 231.939   1 
   0  14   3 787.629 255.800  37 
   0 -14  -3 569.082 217.501  24 
   0 -14   3 539.794 240.128  40 
   0  14   3 518.209 247.012  22 
   0  14   4-54.5484 208.471  37 
   0  14  -4 93.4298 152.004   2 
   0  14  -4 50.5383 157.807  37 
   0 -14  -4-24.2230 170.792  24 
   0  14  -4 490.358 219.167  21 
   0  14   4 13.6495 195.978  22 
   0 -14  -4-84.4485 201.767   1 
   0 -14  -4 184.096 220.905  40 
   0 -14   4 208.170 221.907  24 
   0  14   5 6850.57 625.986  37 
   0  14   5 6570.88 611.766  22 
   0 -14   5 5840.11 617.885  24 
   0 -14  -5 6725.56 615.726  40 
   0  14  -5 6541.24 620.643  21 
   0 -14  -5 6900.67 625.791   1 
   0  14  -5 7005.37 597.087   2 
   0  14  -6 10621.0 790.994  21 
   0 -14  -6 9852.30 765.554   1 
   0 -14  -6 9462.82 735.360  40 
   0  14   6 10236.4 772.000  22 
   0 -14   6 8648.03 780.345  24 
   0  14  -6 10586.4 775.166   2 
   0 -14  -7 3154.88 458.387   1 
   0 -14   7 3041.80 497.540   9 
   0 -14   7 3425.85 536.206  24 
   0 -14   7 3753.04 571.760  27 
   0  14  -7 3503.14 484.338   2 
   0 -14  -7 3624.84 502.260  26 
   0  14  -7 3099.10 460.447  21 
   0  14   7 3648.11 482.669  22 
   0 -14   7 3433.62 455.321   6 
   0  14   7 2999.79 456.687  34 
   0  14   7 3468.97 465.943  35 
   0 -14   7 3890.40 523.721  32 
   0  14   7 3090.90 436.485  28 
   0  14   7 3120.05 431.419  30 
   0  14   8 7318.51 652.280  35 
   0  14   8 7646.66 651.453  30 
   0  14  -8 7070.66 749.516  29 
   0 -14  -8 7687.46 629.261  29 
   0  14   8 7834.28 670.119  28 
   0  14   8 7695.47 679.784  34 
   0 -14   8 6736.20 696.879   9 
   0 -14   8 6873.97 677.363  32 
   0 -14  -8 8017.06 698.867  26 
   0 -14   8 6770.68 741.735  27 
   0 -14   8 7639.13 678.936   6 
   0  14  -8 7478.49 751.485  20 
   0  14   9 3650.87 502.582  34 
   0 -14  -9 4517.24 486.391  29 
   0  14  -9 3906.32 542.371  20 
   0  14  -9 3662.08 563.768  29 
   0 -14   9 3374.36 518.550  27 
   0  14   9 3713.88 469.503  35 
   0 -14  -9 3883.66 482.359  26 
   0  14   9 3974.48 459.047  28 
   0  14   9 3958.78 462.935  30 
   0 -14   9 3157.21 452.313   6 
   0  14 -10 689.226 356.885  17 
   0 -14 -10 833.136 282.198  26 
   0  14  10 1451.26 337.935  34 
   0  14  10 1407.87 295.687  28 
   0  14 -10 929.341 341.825  29 
   0  14 -10 846.483 312.928  20 
   0  14  10 1281.72 288.860  30 
   0 -14  10 772.926 321.616  27 
   0  14  10 865.691 266.142  35 
   0 -14  11 982.756 311.239  27 
   0  14  11 929.764 196.848  28 
   0  14  11 1104.75 274.037  34 
   0 -14 -11 1202.40 302.578  26 
   0  14 -11 1203.50 336.891  17 
   0  14 -11 882.594 292.705  29 
   0  14  11 1160.82 261.490  35 
   0  14  11 1204.30 228.179  30 
   0 -14 -12 4518.52 301.232  32 
   0  14 -12 4514.86 415.977  29 
   0 -14  12 3913.58 399.814  16 
   0 -14  12 3765.72 380.499  27 
   0  14  12 3843.87 342.251  35 
   0  14  12 4626.12 367.638  34 
   0 -14 -12 4732.66 394.904  26 
   0  14 -12 4410.74 416.244  17 
   0 -15   0 170.206 189.353  24 
   0  15   0 278.573 201.455  21 
   0  15   0-119.857 211.532  37 
   0 -15   0-221.085 233.667  40 
   0  15   0 134.428 203.584  39 
   0  15   0-115.846 188.660   2 
   0 -15   0-5.09610 155.150   1 
   0 -15   1 177897. 3190.04  40 
   0  15  -1 164283. 2832.27  37 
   0 -15  -1 175007. 2656.56  24 
   0  15   1 163574. 2889.84  37 
   0  15   1 168942. 2593.75  39 
   0 -15  -1 167333. 2695.42   1 
   0 -15   1 168726. 2690.35  24 
   0 -15  -1 158576. 2879.56  40 
   0  15   1 171344. 2865.09  21 
   0  15  -1 177008. 2532.38   2 
   0  15  -1 172525. 2774.98  21 
   0 -15   2 11087.8 825.705  40 
   0  15   2 9354.98 733.142  37 
   0 -15  -2 10220.8 700.519   1 
   0 -15  -2 11106.8 703.352  24 
   0  15  -2 9899.10 621.405   2 
   0  15  -2 10406.6 706.552  21 
   0 -15  -2 9584.24 723.099  40 
   0 -15   2 10264.2 705.015  24 
   0  15   2 9515.34 712.929  21 
   0  15  -2 9952.44 722.420  37 
   0 -15  -3 168.481 185.620  24 
   0  15   3 251.748 223.612  22 
   0 -15  -3 314.847 221.165  40 
   0 -15  -3 338.792 239.659   1 
   0  15  -3 204.906 151.733  37 
   0  15   3 255.885 194.302  37 
   0 -15   3 1129.44 314.557  40 
   0  15  -3 115.373 165.578   2 
   0 -15   3-30.0489 209.288  24 
   0  15  -3 502.501 235.372  21 
   0  15  -4 231.560 191.717   2 
   0 -15  -4 379.914 226.239   1 
   0  15  -4 101.081 171.072  21 
   0  15   4 227.929 218.056  37 
   0 -15  -4 403.234 232.011  40 
   0 -15  -4 262.687 210.848  24 
   0  15   4 309.189 217.516  22 
   0  15  -4 246.298 170.750  37 
   0 -15   4 223.529 213.253  24 
   0  15   5 473.489 245.090  37 
   0  15   5 786.777 315.574  22 
   0 -15   5 669.271 325.045  24 
   0 -15  -5 724.440 262.377   1 
   0  15  -5 878.971 254.147  21 
   0 -15  -5 551.820 238.410  40 
   0  15  -5 797.879 267.576   2 
   0 -15   6-219.341 386.425  27 
   0 -15   6 548.931 201.719  32 
   0 -15  -6 918.283 283.436  40 
   0  15   6 608.997 220.775  35 
   0 -15   6 731.920 310.841  24 
   0  15  -6 1173.65 297.963  21 
   0  15   6 1168.45 305.911  28 
   0 -15  -6 848.926 308.647  26 
   0 -15  -6 676.041 285.089   1 
   0  15   6 1113.44 322.255  34 
   0  15  -6 753.643 275.376   2 
   0  15   6 992.473 295.642  22 
   0 -15   6 1145.60 379.382   9 
   0 -15   7 38357.5 1570.05   9 
   0  15   7 42034.2 1471.49  28 
   0 -15   7 40268.6 1481.09   6 
   0 -15   7 38819.6 1618.70  27 
   0  15   7 36535.2 1409.01  35 
   0 -15   7 37368.3 1534.97  32 
   0  15   7 43029.5 1481.49  30 
   0  15   7 39334.7 1516.62  34 
   0 -15  -7 40143.2 1535.90  26 
   0  15   8 1700.56 330.486  30 
   0 -15   8 1565.92 368.904  32 
   0  15   8 2386.23 435.655  34 
   0 -15   8 1600.84 371.473   6 
   0  15   8 1982.86 379.602  28 
   0  15  -8 1946.41 465.624  20 
   0  15   8 1487.46 352.308  35 
   0  15  -8 2005.54 470.787  29 
   0 -15   8 1736.35 434.800   9 
   0 -15  -8 1863.91 406.575  26 
   0 -15   8 1547.95 401.169  27 
   0 -15   9 3189.14 513.638  27 
   0  15  -9 3649.21 541.249  20 
   0  15  -9 3657.47 547.504  29 
   0 -15   9 3082.42 437.097   6 
   0 -15  -9 3691.01 498.231  26 
   0  15   9 3925.32 452.767  28 
   0  15   9 2968.27 423.962  35 
   0  15   9 3880.25 449.346  30 
   0  15   9 3672.34 491.007  34 
   0  15 -10 1460.88 378.783  29 
   0  15 -10 1413.35 340.051  20 
   0  15  10 1220.33 300.624  35 
   0  15  10 1422.60 276.935  28 
   0  15  10 1790.31 358.981  34 
   0 -15 -10 1684.79 350.973  26 
   0  15  10 1363.69 264.621  30 
   0  15 -10 1172.03 386.022  17 
   0 -15  10 1361.02 375.984  27 
   0  15 -11 8166.63 631.610  17 
   0  15  11 8153.93 459.759  28 
   0  15  11 7964.66 470.272  30 
   0 -15 -11 8863.22 601.616  26 
   0  15 -11 7863.30 511.878  20 
   0 -15 -11 8741.11 504.745  32 
   0  15 -11 8398.93 621.658  29 
   0  15  11 7881.27 519.982  35 
   0  15  11 8084.85 546.499  34 
   0 -15  11 7835.45 613.274  27 
   0  15 -12 633.228 201.132  17 
   0 -15  12 421.317 189.193  27 
   0 -15 -12 543.130 108.775  32 
   0 -15 -12 618.197 181.950  26 
   0 -15  12 482.591 195.737  16 
   0  15 -12 513.174 193.393  29 
   0  15  12 417.313 150.161  34 
   0 -16   0 356484. 3996.48  24 
   0  16   0 356064. 4213.78  21 
   0  16   0 359517. 4359.24  37 
   0 -16   0 354326. 3933.43   1 
   0  16   0 354469. 4195.42  39 
   0 -16   0 367429. 4579.11  40 
   0  16   1 6882.96 631.040  21 
   0  16  -1 6611.00 619.524  37 
   0  16   1 6482.35 630.608  37 
   0 -16  -1 7436.03 608.020   1 
   0 -16   1 7129.68 598.989  24 
   0  16  -1 7347.22 556.480   2 
   0  16  -1 7092.21 633.388  21 
   0 -16   1 7272.24 691.690  40 
   0 -16  -1 7089.60 570.736  24 
   0  16  -1 6175.23 638.791  39 
   0 -16  -1 6932.88 647.057  40 
   0  16  -2 45904.7 1525.32  21 
   0  16   2 45563.1 1559.41  21 
   0 -16   2 45716.8 1516.34  24 
   0 -16  -2 49979.2 1552.00  24 
   0 -16   2 50591.8 1754.48  40 
   0  16   2 44443.9 1555.27  37 
   0 -16  -2 45122.6 1568.46  40 
   0  16  -2 44171.9 1534.02  37 
   0 -16  -2 46660.6 1528.89   1 
   0  16  -2 48622.1 1413.67   2 
   0  16  -3 301.238 187.553  37 
   0  16   3 432.320 235.583  22 
   0  16  -3 6.14571 197.276  21 
   0  16   3 183.491 193.643  37 
   0 -16  -3 304.355 215.733   1 
   0 -16   3 422.800 250.664  24 
   0 -16  -3 387.061 229.040  24 
   0 -16  -3 402.646 242.441  40 
   0  16  -3 132.724 179.564   2 
   0 -16   3 656.987 280.838  40 
   0  16   4 4322.83 516.898  22 
   0 -16   4 3887.82 513.048  24 
   0  16  -4 3665.07 491.572  37 
   0  16  -4 4571.04 501.590   2 
   0  16   4 4203.48 520.024  37 
   0  16  -4 4041.12 511.706  21 
   0 -16  -4 4452.16 528.505  40 
   0 -16  -4 3650.84 475.222   1 
   0  16  -5 9.66401 192.212   2 
   0 -16  -5 171.250 221.663  26 
   0  16   5 156.231 211.205  28 
   0 -16  -5-87.8415 208.290   1 
   0  16   5 140.553 266.489  22 
   0  16   5 377.043 213.105  35 
   0 -16   5 184.423 205.292  32 
   0 -16  -5-92.0578 212.477  40 
   0 -16   5 137.545 271.983   9 
   0  16   5-20.6465 166.810  37 
   0 -16   5-8.68837 237.588  24 
   0  16   5 174.117 216.592  34 
   0  16  -5 192.956 209.244  21 
   0 -16   5-639.285 377.881  27 
   0  16  -5-58.9272 309.589  31 
   0  16   6 14450.3 906.997  28 
   0 -16  -6 14388.8 925.845   1 
   0 -16   6 12772.8 964.632  24 
   0  16   6 13609.7 865.584  35 
   0 -16   6 12826.3 907.145  32 
   0 -16  -6 13597.7 908.725  40 
   0  16  -6 14126.3 949.266  21 
   0 -16   6 14323.3 972.669  27 
   0  16  -6 14963.9 1007.31  31 
   0 -16  -6 13674.8 928.259  26 
   0 -16   6 13501.2 938.000   9 
   0  16   6 14565.5 935.800  22 
   0  16   6 14256.9 942.596  34 
   0  16   7 741.631 287.369  35 
   0  16   7 1029.09 343.482  34 
   0 -16   7 764.984 316.639  32 
   0  16   7 638.454 290.536  28 
   0 -16  -7 591.545 276.588  26 
   0  16   7 475.053 222.097  30 
   0 -16   7 640.764 348.952  27 
   0 -16   7 557.489 337.161   9 
   0 -16   8 24207.7 1295.63  27 
   0  16  -8 25889.0 1330.26  20 
   0  16  -8 25337.0 1326.30  29 
   0 -16   8 25032.9 1150.76   6 
   0  16   8 26579.9 1213.27  34 
   0  16   8 26180.5 1134.39  28 
   0 -16  -8 24231.8 1194.56  26 
   0  16   8 28069.1 1157.24  30 
   0 -16   8 24149.8 1253.43   9 
   0 -16   8 24895.8 1253.13  32 
   0  16   8 24261.1 1131.21  35 
   0 -16   9 3652.20 456.595   6 
   0  16  -9 4213.07 583.754  29 
   0  16   9 3573.70 456.162  35 
   0  16   9 4930.25 477.076  30 
   0  16  -9 4182.61 573.193  20 
   0  16   9 4320.64 503.621  34 
   0 -16   9 2885.74 488.213  27 
   0 -16  -9 3862.16 498.214  26 
   0  16   9 4162.17 465.688  28 
   0  16 -10 421.046 256.357  20 
   0  16  10 399.788 254.605  34 
   0  16  10 266.555 165.148  30 
   0 -16 -10 643.139 269.786  26 
   0  16  10 178.742 176.535  28 
   0  16 -10 302.611 284.679  17 
   0  16  10 214.923 205.663  35 
   0  16 -10 426.502 283.535  29 
   0 -16  10 201.126 266.571  27 
   0  16  11 256.593 142.129  28 
   0  16 -11 120.468 151.530  20 
   0 -16 -11 286.432 150.185  32 
   0  16 -11 188.597 230.150  17 
   0  16  11 227.101 176.182  34 
   0  16 -11 131.129 198.206  29 
   0 -16  11 354.949 220.603  27 
   0 -16 -11 375.406 217.202  26 
   0  17   0-149.266 223.053  37 
   0  17   0 50.4571 192.910  21 
   0  17   0-7.27019 167.192  39 
   0 -17   0-239.766 280.638   1 
   0 -17   0-168.797 258.083  40 
   0 -17   0-28.9004 185.628  24 
   0  17  -1 167473. 3098.49  37 
   0  17  -1 161530. 3109.67  39 
   0 -17  -1 176769. 2972.20   1 
   0  17  -1 171901. 3034.10  21 
   0 -17   1 176198. 2872.31   1 
   0  17  -1 182027. 2806.08   2 
   0  17   1 160916. 3071.30  37 
   0  17   1 174825. 3116.90  21 
   0 -17  -1 176833. 3199.65  40 
   0 -17  -1 176378. 2879.62  24 
   0 -17   1 176917. 2955.73  24 
   0 -17   1 190567. 3454.63  40 
   0  17  -2 14863.8 928.388  21 
   0  17   2 13750.5 917.263  37 
   0  17  -2 15124.2 940.318  37 
   0 -17  -2 16246.2 976.904  40 
   0 -17   2 17424.6 1053.76  40 
   0 -17  -2 17071.1 934.310  24 
   0 -17   2 16002.8 942.677  24 
   0  17  -2 15652.2 843.726   2 
   0  17  -2 14127.0 991.274  39 
   0 -17  -2 15192.7 907.624   1 
   0  17   2 13836.1 917.122  21 
   0  17   2 15897.5 943.878  22 
   0  17  -3 1258.63 310.865  37 
   0  17   3 1061.42 303.053  37 
   0 -17  -3 1109.74 294.224   1 
   0  17   3 920.382 303.524  22 
   0 -17   3 639.884 250.184  24 
   0 -17   3 1180.60 336.661  40 
   0  17  -3 1021.70 263.491   2 
   0  17  -3 824.234 262.582  21 
   0 -17  -3 1411.94 338.799  40 
   0 -17  -4-63.1531 184.448   1 
   0  17  -4 182.591 242.821  31 
   0  17   4-14.3938 181.109  37 
   0 -17  -4 78.4468 193.006  26 
   0  17  -4 139.682 188.958   2 
   0 -17   4 157.715 223.578  24 
   0 -17   4 139.908 224.181  32 
   0  17  -4 76.7892 168.858  21 
   0 -17   4-496.229 406.230  27 
   0  17   4 325.254 222.063  28 
   0  17   4 246.752 198.851  22 
   0 -17  -4 125.862 209.768  40 
   0 -17   4 120.721 253.905   9 
   0 -17  -4-41.5610 233.589  32 
   0  17   4 215.012 218.696  34 
   0 -17  -5 1448.00 341.420   1 
   0  17  -5 783.858 251.816  31 
   0 -17   5 423.800 269.119  27 
   0  17   5 1437.71 343.649  22 
   0  17   5 1787.06 382.726  28 
   0 -17   5 1435.68 396.442   9 
   0 -17   5 1186.83 320.675  24 
   0  17   5 1543.69 370.830  34 
   0 -17   5 2036.48 406.005  32 
   0  17   5 1315.46 343.106  37 
   0 -17  -5 2120.46 408.907  32 
   0 -17  -5 1395.52 350.627  26 
   0 -17  -5 831.918 263.480  40 
   0  17  -5 1647.77 366.375  21 
   0  17   6 5015.59 545.898  35 
   0 -17  -6 5172.54 605.923  26 
   0 -17   6 5997.22 676.085  27 
   0  17  -6 5666.82 646.673  31 
   0 -17   6 5370.33 601.183  32 
   0  17   6 5860.10 612.476  34 
   0 -17   6 5540.20 667.005   9 
   0  17   6 5843.92 602.060  28 
   0 -17   7 15976.4 1043.87   9 
   0  17   7 18074.2 982.065  28 
   0 -17   7 16811.8 1071.78  27 
   0  17  -7 17821.5 1171.43  20 
   0  17   7 17164.6 942.948  35 
   0  17   7 17150.6 1007.11  34 
   0 -17  -7 17569.3 1029.38  26 
   0 -17   7 16501.6 1018.98  32 
   0 -17   8 671.494 356.745   9 
   0  17   8 849.597 309.976  28 
   0  17  -8 997.498 365.614  29 
   0  17   8 578.934 239.295  35 
   0  17   8 382.700 261.282  34 
   0  17  -8 732.492 360.048  20 
   0 -17   8 506.792 283.159  32 
   0 -17   8 829.205 364.430  27 
   0 -17  -8 971.806 337.679  26 
   0 -17   9 6022.12 646.927  27 
   0  17   9 6436.41 544.564  28 
   0  17  -9 6290.23 652.421  20 
   0  17   9 5796.06 557.263  34 
   0 -17  -9 6911.72 597.332  26 
   0  17   9 5669.00 510.582  35 
   0 -17  -9 6625.14 560.448  32 
   0  17  -9 6403.60 652.115  29 
   0  17 -10 2220.74 404.334  17 
   0 -17 -10 2180.48 342.621  26 
   0 -17 -10 2367.75 311.443  32 
   0  17  10 2285.15 296.685  28 
   0  17  10 2591.18 363.319  34 
   0 -17  10 2045.68 388.553  27 
   0  17 -10 2162.92 363.594  20 
   0  17 -10 1911.91 358.833  29 
   0  17 -11 9576.03 592.546  17 
   0  17  11 10151.6 539.006  34 
   0  17 -11 9948.38 588.831  29 
   0  17  11 9135.71 426.980  28 
   0  17 -11 8686.07 470.480  20 
   0 -17 -11 9557.59 451.605  32 
   0 -17 -11 9962.57 557.374  26 
   0 -17  11 8434.60 564.301  27 
   0  18   0 75397.6 2145.18  37 
   0 -18   0 79336.3 2020.82  24 
   0 -18   0 78063.8 2015.58   1 
   0  18   0 74585.0 2129.47  21 
   0 -18   1 822.484 305.543  40 
   0 -18   1 672.356 279.028  24 
   0  18   1 394.656 258.123  37 
   0 -18  -1 241.794 175.352   1 
   0  18   1 160.553 182.907  21 
   0 -18   1 308.653 183.463   1 
   0  18  -1 452.339 217.816   2 
   0  18  -1 403.354 247.871  37 
   0  18  -1 410.344 264.948  39 
   0 -18  -1 473.540 228.286  24 
   0 -18  -1 659.330 273.232  40 
   0  18  -1 459.701 243.062  21 
   0  18   2 6815.96 679.896  37 
   0 -18  -2 8556.20 683.078  24 
   0 -18   2 9610.90 823.641  40 
   0  18  -2 7194.05 700.217  21 
   0 -18  -2 8721.59 733.705  40 
   0 -18  -2 8002.45 690.436   1 
   0  18  -2 7527.16 699.921  37 
   0  18  -2 6923.26 712.770  39 
   0  18  -2 8345.36 649.377   2 
   0  18   2 7457.79 702.473  22 
   0 -18   2 7653.10 678.006  24 
   0  18  -3 817.641 336.329  31 
   0 -18   3 448.956 238.189  26 
   0 -18   3 914.820 289.707  24 
   0 -18   3 902.771 304.267   9 
   0 -18   3 816.303 273.388  32 
   0 -18  -3 673.750 256.578  40 
   0 -18   3 1561.01 362.704  27 
   0  18  -3 553.477 246.612  37 
   0 -18  -3 951.114 289.848  32 
   0 -18   3 772.129 259.348  40 
   0  18   3 827.002 268.917  22 
   0  18  -3 938.165 340.912  39 
   0 -18  -3 1137.43 299.911   1 
   0  18   3 834.146 268.373  37 
   0  18   3 887.349 300.505  28 
   0  18  -3 1139.77 306.686  21 
   0  18  -3 839.855 266.295   2 
   0  18   3 854.375 257.696  34 
   0 -18  -3 528.456 233.685  26 
   0 -18   4 723.656 307.863   9 
   0  18  -4 1130.90 334.833  21 
   0 -18  -4 1255.10 343.302  26 
   0 -18   4 1144.85 355.282  24 
   0 -18  -4 1260.02 343.792  40 
   0 -18   4 1038.22 344.940  32 
   0  18   4 504.788 227.364  34 
   0  18  -4 1152.12 379.735  31 
   0 -18  -4 1325.24 346.076  32 
   0  18   4 1022.66 301.010  28 
   0  18   4 1050.17 332.149  37 
   0 -18  -4 1150.46 301.484   1 
   0  18  -4 1361.47 415.758  39 
   0 -18   4 386.315 303.741  27 
   0  18   4 937.400 291.925  22 
   0 -18   5 2948.19 470.757  32 
   0  18   5 3377.35 491.578  28 
   0 -18   5 2115.98 357.812  27 
   0 -18  -5 3214.19 496.815  26 
   0  18   5 3238.17 475.487  34 
   0 -18  -5 3294.14 486.465  32 
   0 -18   5 2984.88 503.953   9 
   0  18  -5 2641.18 510.341  31 
   0  18   6 432.312 245.781  28 
   0 -18   6 540.634 312.015  27 
   0 -18   6 341.649 264.845  32 
   0 -18  -6 403.017 255.877  26 
   0 -18  -6 388.310 273.778  32 
   0 -18   6 304.219 286.677   9 
   0  18   6 624.976 292.229  34 
   0  18  -6 419.004 289.679  31 
   0  18  -7 10071.2 895.402  20 
   0 -18  -7 10334.5 775.474  26 
   0 -18   7 10003.6 824.126  32 
   0 -18   7 9141.38 796.718   9 
   0 -18   7 9486.70 815.232  27 
   0 -18  -7 10243.3 739.201  32 
   0  18   7 10526.7 767.454  28 
   0  18   7 9069.68 737.934  34 
   0  18  -8 4101.26 564.585  29 
   0 -18   8 3558.90 526.126   9 
   0  18  -8 3645.04 559.109  20 
   0 -18  -8 4251.85 476.803  32 
   0 -18   8 3323.29 486.369  32 
   0  18   8 3601.97 444.635  28 
   0  18   8 3774.00 486.514  34 
   0 -18  -8 4060.77 489.358  26 
   0 -18   8 4039.75 557.652  27 
   0  18  -9 281.735 264.549  29 
   0  18   9 250.922 227.184  34 
   0 -18   9 155.257 280.878  27 
   0  18  -9 107.471 269.595  20 
   0 -18  -9 325.114 210.362  32 
   0  18   9 67.8657 194.192  28 
   0 -18  -9-53.4174 218.219  26 
   0  18 -10 611.809 233.755  20 
   0  18 -10 389.764 263.118  17 
   0  18 -10 164.203 205.275  29 
   0  18  10 436.289 176.689  28 
   0 -18  10 102.427 219.055  27 
   0 -18 -10 777.747 189.931  32 
   0  18  10 403.770 214.926  34 
   0 -18 -10 378.884 201.976  26 
   0  18 -11 2144.94 226.153  20 
   0 -18 -11 2559.24 213.273  32 
   0  18 -11 2365.06 307.817  17 
   0  18  11 2337.39 201.805  28 
   0 -18 -11 2573.86 276.238  26 
   0  18 -11 2421.83 288.417  29 
   0 -18  11 2283.86 302.565  27 
   0  18  11 2497.74 266.273  34 
   0  19   0 127.294 256.745  31 
   0 -19   0 194.813 219.913   1 
   0  19   0-100.929 185.454  37 
   0 -19   0-94.9230 159.709  26 
   0 -19   0-31.2690 215.354  32 
   0 -19   0-128.795 221.267  40 
   0 -19   0 15.9214 194.945  24 
   0  19   0 61.8594 172.863  28 
   0  19   0 71.3719 188.158  21 
   0  19  -1 807.650 277.894  37 
   0  19   1 822.177 283.755  31 
   0 -19   1 815.452 287.639  32 
   0 -19  -1 1037.45 315.989  32 
   0 -19   1 509.694 233.610  26 
   0 -19  -1 1142.16 311.323  24 
   0 -19  -1 454.700 216.569  26 
   0  19   1 529.597 244.928  28 
   0 -19   1 801.945 286.301  24 
   0  19  -1 861.738 305.413  39 
   0 -19   1 695.659 270.736  40 
   0 -19  -1 1372.99 361.163  40 
   0  19  -1 639.549 276.827  31 
   0  19   1 739.330 269.281  37 
   0 -19  -1 790.972 291.153   1 
   0  19  -1 854.210 291.394  21 
   0  19  -1 712.153 279.710  28 
   0  19   1 584.756 243.164  21 
   0 -19   1 1058.85 343.464   9 
   0  19  -2-23.2679 198.070  21 
   0  19   2 182.660 184.772  34 
   0  19   2 151.991 232.783  31 
   0 -19   2 130.585 222.710   9 
   0 -19  -2 34.7683 225.508  32 
   0  19   2 211.039 232.206  22 
   0  19  -2 114.400 200.722  39 
   0 -19  -2-59.3972 198.765  40 
   0  19  -2-224.959 365.733  31 
   0  19  -2-134.172 205.559  37 
   0  19  -2 144.521 254.460  28 
   0  19   2 74.7008 255.325  28 
   0 -19   2-12.2255 235.741  40 
   0 -19  -2 54.7236 190.992  26 
   0 -19   2-266.029 235.862  24 
   0 -19  -2 99.4469 204.032   1 
   0  19   2-230.759 241.497  37 
   0 -19   2 325.753 310.411  27 
   0 -19   2-21.3751 190.574  32 
   0 -19   2-1.10866 170.242  26 
   0 -19   3 274.643 191.405  24 
   0  19   3 393.244 251.652  28 
   0 -19   3 644.473 253.917  32 
   0  19  -3 379.772 248.993  39 
   0 -19   3 266.925 207.835  26 
   0 -19  -3 419.726 239.637   1 
   0 -19  -3 504.537 270.158  26 
   0 -19  -3 444.638 270.352  32 
   0  19   3 228.905 197.095  34 
   0  19   3 512.320 251.611  22 
   0  19   3 674.372 259.502  37 
   0 -19   3 342.343 270.960   9 
   0  19  -3 304.303 258.804  37 
   0  19   3 794.393 295.302  31 
   0  19  -3 361.005 228.459  21 
   0 -19   3 211.927 308.063  27 
   0 -19  -3 878.607 287.175  40 
   0  19  -3 618.745 320.276  31 
   0 -19   4 1364.61 385.756   9 
   0 -19   4 665.505 268.323  27 
   0  19   4 1546.01 367.494  28 
   0 -19   4 1379.98 368.332  32 
   0 -19  -4 1802.42 401.835  26 
   0  19  -4 1670.26 463.024  31 
   0  19   4 914.857 280.601  34 
   0 -19  -4 1196.93 359.586  32 
   0 -19   5 6489.38 682.719   9 
   0 -19  -5 6127.81 620.159  32 
   0  19  -5 6371.01 745.318  31 
   0 -19   5 4206.80 539.142  27 
   0  19   5 6010.35 631.415  28 
   0 -19  -5 5705.03 627.185  26 
   0  19   5 5341.07 592.266  34 
   0 -19   5 5808.41 631.472  32 
   0 -19  -6 680.072 297.061  26 
   0  19  -6 40.7770 274.274  31 
   0  19   6 372.371 260.079  34 
   0 -19  -6 734.373 285.339  32 
   0 -19   6 213.992 280.772   9 
   0  19   6 491.934 286.246  28 
   0 -19   6 490.734 306.665  32 
   0 -19   6 517.065 335.654  27 
   0  19  -7 257.581 343.792  20 
   0 -19   7 299.267 280.942  32 
   0  19  -7 153.727 290.470  29 
   0 -19   7 233.299 300.586   9 
   0  19   7 240.307 240.235  34 
   0 -19  -7 287.716 268.315  32 
   0  19   7 33.5794 273.571  28 
   0 -19   7 544.307 343.787  27 
   0 -19  -7 382.314 267.755  26 
   0 -19   8 3984.54 543.278  27 
   0 -19   8 3506.68 511.722   9 
   0  19   8 3714.04 444.634  28 
   0  19  -8 3577.91 526.240  29 
   0  19  -8 3769.29 556.964  20 
   0 -19  -8 4197.49 460.546  32 
   0  19   8 3672.03 458.774  34 
   0 -19   8 3478.55 485.608  32 
   0 -19  -8 4257.86 491.660  26 
   0 -19  -9 69.8605 179.477  32 
   0 -19  -9-95.8753 204.557  26 
   0 -19   9-80.7234 275.889  27 
   0  19   9-138.294 228.333  34 
   0  19  -9 70.9713 234.004  29 
   0  19   9 34.0424 173.748  28 
   0  19  -9-32.1819 282.266  20 
   0 -19  10 25.1269 196.427  27 
   0  19 -10-40.6908 205.890  17 
   0  19 -10-106.784 208.085  29 
   0 -19 -10 65.0575 116.447  32 
   0  19  10-54.3969 165.360  34 
   0  19  10 39.5742 121.712  28 
   0  19 -10-156.329 183.473  20 
   0 -19 -10-103.910 193.799  26 
   0  20   0 376.453 258.785  21 
   0 -20   0 281.363 247.117  24 
   0 -20   0 1067.24 361.200   9 
   0 -20   0 197.680 206.935  32 
   0 -20   0 582.927 231.928  40 
   0 -20   0 330.826 236.897  26 
   0  20   0 161.351 204.846  28 
   0  20   0 292.157 201.129  37 
   0  20   0-92.3046 270.450  31 
   0  20   1 875.562 306.026  37 
   0 -20   1 967.344 293.817  24 
   0 -20   1 1202.77 351.943   9 
   0 -20   1 1024.99 322.268  26 
   0  20   1 949.519 329.590  21 
   0 -20  -1 1080.76 335.153  40 
   0  20  -1 864.742 321.597  28 
   0 -20   1 1231.38 329.182  32 
   0  20  -1 533.813 280.910  31 
   0 -20  -1 1273.37 343.697  32 
   0  20  -1 1150.86 327.046  21 
   0  20  -1 991.771 307.386  37 
   0 -20   1 1628.13 400.342  40 
   0  20   1 834.530 310.188  31 
   0  20   1 853.615 330.175  28 
   0  20   1 705.985 229.119  34 
   0 -20  -1 1434.14 344.047  26 
   0  20   2 3691.81 507.551  31 
   0 -20   2 4130.08 546.563  27 
   0 -20   2 4496.22 591.907  40 
   0  20  -2 3659.83 539.415  28 
   0 -20  -2 3880.56 516.856  32 
   0 -20   2 2897.53 475.468  26 
   0  20  -2 3648.32 514.283  21 
   0  20  -2 2914.00 498.396  39 
   0 -20   2 4164.61 552.140   9 
   0 -20   2 3641.22 499.410  32 
   0  20  -2 3351.63 501.729  37 
   0 -20   2 3738.93 522.150  24 
   0  20   2 3152.66 476.528  28 
   0  20   2 3258.12 494.147  34 
   0  20  -2 3270.61 569.441  31 
   0 -20  -2 3642.17 501.254  26 
   0 -20   3 2726.68 476.535   9 
   0  20   3 2261.90 401.017  34 
   0 -20  -3 2515.65 424.832  26 
   0  20  -3 3012.47 578.746  31 
   0 -20   3 1940.44 373.582  27 
   0  20   3 2427.42 428.999  28 
   0 -20   3 2402.16 434.019  32 
   0  20   3 2627.91 415.002  31 
   0 -20  -3 2857.64 458.829  32 
   0 -20   3 1780.09 395.951  26 
   0  20   4 7.28152 238.306  34 
   0 -20   4-868.853 432.120  27 
   0  20  -4-84.9799 292.698  31 
   0 -20  -4 157.062 233.090  32 
   0 -20  -4 164.927 242.927  26 
   0 -20   4 444.366 285.182  32 
   0 -20   4 316.786 317.345   9 
   0  20   4-279.363 275.254  28 
   0 -20  -5 50.2266 255.058  26 
   0  20   5 173.867 221.601  34 
   0 -20   5 406.040 271.815  27 
   0 -20   5 219.966 329.091   9 
   0  20   5 161.120 260.717  28 
   0 -20   5 197.856 254.276  32 
   0 -20  -5 41.1519 236.007  32 
   0  20  -5-207.314 320.765  31 
   0  20   6 449.321 285.873  28 
   0  20   6 106.379 248.028  34 
   0 -20  -6 620.509 290.795  32 
   0 -20  -6 299.640 268.666  26 
   0  20  -6 542.730 346.859  31 
   0 -20   6 528.486 321.632   9 
   0 -20   6 550.047 281.724  32 
   0 -20   6 520.463 295.142  27 
   0 -20   7 258.480 279.558   9 
   0 -20   7 471.615 277.650  32 
   0 -20  -7 279.008 248.463  26 
   0  20   7 333.636 253.861  28 
   0  20  -7 477.966 253.763  31 
   0  20  -7 293.025 287.829  29 
   0 -20  -7 521.362 251.961  32 
   0  20  -7 507.580 365.591  20 
   0  20   7 214.106 238.026  34 
   0 -20   7 588.718 316.221  27 
   0  20   8 507.380 228.606  34 
   0  20  -8 892.711 326.856  29 
   0 -20   8 1054.73 309.106  32 
   0  20   8 1133.76 287.436  28 
   0 -20   8 997.113 344.833  27 
   0  20  -8 970.293 354.057  20 
   0 -20  -8 948.214 239.488  18 
   0 -20  -8 984.862 281.282  26 
   0 -20  -8 1147.21 282.963  32 
   0  20  -9 147.634 238.870  20 
   0  20   9 62.0167 160.507  28 
   0 -20   9-261.329 260.869  27 
   0  20  -9 353.816 230.303  29 
   0 -20  -9 239.528 190.864  26 
   0  20  -9 285.884 268.084  17 
   0  20   9 258.376 194.274  34 
   0 -20  -9 208.441 158.842  32 
   0  20 -10 37.3758 168.450  17 
   0  20 -10-3.36487 164.265  29 
   0  20  10-124.638 119.191  28 
   0 -20 -10-22.5920 104.328  32 
   0  20  10 17.3496 131.096  34 
   0  20 -10-79.4195 168.620  20 
   0 -20  10-196.619 187.607  27 
   0 -20 -10 48.2912 131.006  26 
   0  21   0-151.004 232.418  28 
   0  21   0-277.438 324.874  31 
   0 -21   0 174.885 261.206  32 
   0 -21   0 42.0020 251.635  26 
   0 -21   0 161.107 304.522   9 
   0  21   1 9330.95 765.050  31 
   0 -21   1 8462.80 734.941  26 
   0 -21   1 8686.54 753.355  32 
   0 -21  -1 8430.77 733.892  26 
   0  21  -1 9170.94 784.681  28 
   0  21  -1 8077.94 750.771  31 
   0  21   1 7961.18 734.091  28 
   0 -21  -1 9336.69 786.044  32 
   0 -21   1 9162.74 791.701   9 
   0 -21  -2 222.949 267.471  32 
   0  21   2 82.1718 229.445  34 
   0 -21   2-43.8961 259.233   9 
   0 -21   2 12.7596 265.537  32 
   0  21   2-409.163 316.397  31 
   0  21  -2 46.2669 334.513  31 
   0 -21   2 134.587 232.444  26 
   0 -21  -2-94.1474 216.656  26 
   0  21  -2 266.281 245.108  28 
   0 -21   2-375.180 386.341  27 
   0  21   2 133.611 270.053  28 
   0 -21   3 10184.4 803.190  27 
   0  21  -3 8236.34 839.090  31 
   0  21   3 10618.9 764.304  31 
   0 -21  -3 9507.71 767.845  26 
   0  21   3 9682.51 785.556  34 
   0 -21  -3 9444.79 780.955  32 
   0 -21   3 9778.87 826.906   9 
   0 -21   3 8864.10 770.572  32 
   0  21   3 8676.85 741.684  28 
   0 -21   4 1328.99 327.650  27 
   0  21  -4 2111.87 512.813  31 
   0  21   4 2356.92 429.588  34 
   0 -21  -4 2291.40 425.260  26 
   0 -21  -4 2569.83 426.395  32 
   0  21   4 2294.98 417.559  28 
   0 -21   4 2745.28 502.762   9 
   0 -21   4 2241.91 426.379  32 
   0 -21   5 6265.88 647.339  27 
   0 -21   5 4837.78 598.968  32 
   0 -21  -5 5584.75 578.756  26 
   0 -21  -5 6315.67 604.531  32 
   0  21  -5 5297.32 665.050  31 
   0 -21   5 5676.64 642.969   9 
   0  21   5 5352.19 576.370  28 
   0  21   5 5183.35 569.798  34 
   0 -21   6 1133.05 377.968   9 
   0  21  -6 1310.13 477.937  20 
   0 -21   6 886.212 328.788  27 
   0 -21  -6 1181.08 316.378  32 
   0 -21  -6 1028.56 311.992  26 
   0  21  -6 1097.11 402.612  31 
   0  21   6 740.105 298.539  34 
   0 -21   6 760.424 320.372  32 
   0  21   6 832.738 298.904  28 
   0  21   7 29.3471 239.060  28 
   0 -21  -7-173.272 251.932  26 
   0  21   7-134.255 217.395  34 
   0  21  -7-4.57211 245.884  31 
   0  21  -7 151.782 246.257  29 
   0  21  -7-280.653 340.947  20 
   0 -21   7-231.951 347.827   9 
   0 -21  -7 20.7019 199.062  32 
   0 -21   7-28.4489 257.476  27 
   0 -21   7-65.2910 248.237  32 
   0 -21   8 827.628 294.132  27 
   0 -21  -8 1143.64 249.441  32 
   0  21  -8 837.006 336.100  20 
   0 -21  -8 1335.87 274.566  18 
   0  21   8 951.868 263.971  34 
   0  21  -8 842.292 296.659  29 
   0  21   8 1052.64 251.929  28 
   0 -21  -8 827.075 233.947  26 
   0 -21   8 811.423 266.385  32 
   0  21  -9-100.079 206.751  20 
   0  21  -9-287.993 199.105  29 
   0  21   9-49.4490 166.839  34 
   0  21   9 207.692 162.533  28 
   0  21  -9-1.42514 199.628  17 
   0 -21   9 217.015 226.846  27 
   0 -21  -9 77.0959 155.751  26 
   0 -21  -9-51.9434 133.435  32 
   0  22   0 1929.92 421.145  28 
   0 -22   0 1696.35 423.894   9 
   0 -22   0 1125.59 347.394  32 
   0  22   0 1083.46 336.055  31 
   0 -22   0 1873.48 411.364  26 
   0 -22  -1 1079.49 343.532  32 
   0 -22   1 883.645 312.821  26 
   0  22  -1 656.009 385.630  31 
   0  22   1 936.226 337.791  28 
   0  22   1 772.362 321.651  31 
   0 -22  -1 1431.74 386.340   9 
   0 -22   1 930.565 322.702  32 
   0 -22  -1 1015.67 338.212  26 
   0 -22   1 892.136 337.783   9 
   0  22  -1 603.324 300.442  28 
   0  22  -2 12774.6 958.259  31 
   0  22   2 12510.4 854.944  34 
   0 -22   2 13468.7 944.347   9 
   0 -22   2 13321.2 865.315  27 
   0 -22  -2 13137.6 897.813  26 
   0  22   2 13286.6 887.058  31 
   0 -22  -2 13264.3 904.224  32 
   0  22  -2 12618.9 906.095  28 
   0  22   2 11845.0 870.934  28 
   0 -22   2 11413.6 864.971  32 
   0 -22   2 12103.3 891.846  26 
   0  22   3 234.361 244.445  31 
   0 -22   3 247.991 292.029   9 
   0 -22   3-736.992 440.669  27 
   0 -22   3 359.030 320.997  32 
   0  22  -3 528.773 370.483  31 
   0  22   3 581.472 335.585  28 
   0 -22  -3 376.065 273.193  32 
   0 -22  -3 248.719 247.084  26 
   0  22   3 121.373 225.849  34 
   0  22   4 38130.6 1447.25  28 
   0  22  -4 36947.9 1596.41  31 
   0 -22   4 36806.5 1481.20  32 
   0 -22  -4 37671.4 1433.64  26 
   0 -22   4 38376.8 1543.61   9 
   0 -22  -4 37765.2 1426.26  32 
   0  22   4 37364.0 1421.40  34 
   0 -22   4 39202.1 1515.16  27 
   0 -22  -5 793.100 307.278  32 
   0 -22  -5 897.718 289.145  26 
   0  22   5 725.223 295.922  28 
   0 -22   5 1334.03 386.739  27 
   0  22   5 928.000 299.513  34 
   0 -22   5 737.027 302.791  32 
   0 -22   5 1016.64 370.464   9 
   0  22  -5 941.871 369.313  31 
   0  22   6 277.453 247.428  28 
   0  22  -6 625.984 324.202  31 
   0 -22  -6 524.109 254.094  26 
   0 -22   6 572.280 256.327  32 
   0  22  -6 901.399 430.137  20 
   0  22   6 572.130 256.654  34 
   0 -22   6 719.455 333.171   9 
   0 -22  -6 829.277 282.237  32 
   0 -22   6 737.630 298.926  27 
   0 -22   7-374.804 308.981   9 
   0  22   7-63.8646 215.052  28 
   0  22  -7-75.4759 293.837  20 
   0  22   7 132.197 209.827  34 
   0 -22   7 82.4410 219.303  32 
   0 -22  -7-20.1063 198.556  26 
   0 -22  -7 48.2861 194.711  32 
   0 -22   7-487.803 315.255  27 
   0  22  -7-110.332 221.099  31 
   0  22  -7 72.0442 216.631  29 
   0 -22  -8 1042.68 228.709  18 
   0  22  -8 819.784 242.622  29 
   0  22   8 1393.02 261.793  28 
   0 -22   8 426.306 204.606  32 
   0  22   8 752.145 220.110  34 
   0 -22   8 653.226 252.134  27 
   0 -22  -8 801.767 234.645  26 
   0  22  -8 781.024 282.725  20 
   0 -22  -8 870.455 200.880  32 
   0  22   9 689.521 167.403  28 
   0 -22  -9 690.019 145.321  32 
   0 -22  -9 810.960 176.992  26 
   0  22  -9 589.475 203.578  17 
   0 -22   9 820.905 221.182  27 
   0  22  -9 588.212 175.327  29 
   0  22   9 732.434 182.992  34 
   0  22  -9 515.281 184.074  20 
   0 -23   0 169.587 273.889   9 
   0 -23   0 113.933 234.770  26 
   0 -23   0-269.437 293.892  32 
   0  23   0 732.166 389.292  31 
   0  23   0 299.568 288.361  28 
   0  23  -1 907.511 320.273  28 
   0 -23  -1 1583.24 392.764   9 
   0  23   1 1707.61 401.958  31 
   0 -23   1 1604.73 401.273  32 
   0 -23   1 1092.53 338.112  26 
   0  23   1 686.377 289.783  28 
   0 -23  -1 1460.23 366.214  26 
   0  23  -1 1976.01 519.728  31 
   0 -23  -1 1372.77 372.969  32 
   0 -23   1 1353.72 397.816   9 
   0 -23  -2 4077.88 552.025   9 
   0 -23   2 3083.90 474.100  32 
   0 -23   2 2731.05 461.172  26 
   0  23   2 2785.24 493.454  28 
   0  23  -2 3524.05 501.349  28 
   0 -23  -2 3396.69 505.586  32 
   0  23   2 3956.29 536.943  31 
   0  23  -2 3680.56 583.676  31 
   0 -23   2 3197.68 527.244   9 
   0 -23  -2 3187.14 482.148  26 
   0  23   3 39060.4 1440.09  34 
   0 -23   3 43034.9 1598.38   9 
   0  23   3 38117.1 1462.78  28 
   0 -23  -3 42273.1 1508.44  32 
   0  23  -3 40714.4 1639.75  31 
   0 -23   3 38651.3 1519.39  32 
   0 -23   3 43375.3 1540.24  27 
   0  23   3 47071.2 1535.18  31 
   0 -23  -3 40419.6 1462.85  26 
   0 -23  -4 2367.57 418.527  32 
   0 -23   4 2340.70 487.856   9 
   0  23   4 2416.83 455.928  28 
   0 -23   4 2520.31 441.032  27 
   0  23  -4 2079.25 484.982  31 
   0  23   4 1877.98 368.666  34 
   0 -23  -4 1969.05 369.211  26 
   0 -23   4 1866.91 402.140  32 
   0  23   5 14308.4 863.991  28 
   0 -23  -5 13173.8 801.554  26 
   0  23   5 13675.1 805.907  34 
   0  23  -5 13999.7 945.684  31 
   0  23  -5 14818.6 998.429  20 
   0 -23  -5 14451.8 837.034  32 
   0 -23   5 14321.6 932.714   9 
   0 -23   5 13743.7 863.417  32 
   0 -23   5 15159.1 908.287  27 
   0  23   6 2536.46 409.975  28 
   0 -23   6 2336.79 382.873  27 
   0  23  -6 1836.28 368.993  31 
   0 -23   6 1912.44 390.303   9 
   0 -23  -6 2041.03 347.167  26 
   0  23  -6 2240.56 388.469  29 
   0 -23  -6 2390.99 354.133  32 
   0  23   6 2158.90 349.929  34 
   0 -23   6 1930.44 365.693  32 
   0  23  -6 2493.31 466.505  20 
   0 -23   7 1132.87 270.818  32 
   0 -23  -7 1413.02 271.987  26 
   0  23  -7 1456.17 368.535  20 
   0 -23   7 1602.06 324.716  27 
   0  23  -7 1541.38 304.577  29 
   0  23  -7 1460.44 281.353  31 
   0  23   7 1199.99 256.179  34 
   0 -23  -7 1193.22 242.515  32 
   0  23   7 1457.31 301.650  28 
   0 -23   7 1226.30 322.067   9 
   0 -23  -7 1617.59 300.888  18 
   0  23   8 935.693 212.094  28 
   0 -23   8 957.012 247.998  27 
   0  23  -8 870.738 216.260  29 
   0  23  -8 1155.69 258.197  17 
   0 -23  -8 1167.33 228.686  26 
   0  23   8 754.713 188.551  34 
   0  23  -8 700.095 244.282  20 
   0 -23  -8 556.512 158.182  18 
   0 -23  -8 872.412 180.852  32 
   0  24   0 1571.51 438.685  31 
   0  24   0 809.450 316.004  28 
   0 -24   0 839.706 331.662  32 
   0 -24   0 1061.12 327.238  26 
   0 -24   0 1048.02 354.283   9 
   0  24  -1 1608.66 387.110  28 
   0 -24  -1 1571.07 391.473  32 
   0 -24   1 1525.95 365.418  32 
   0  24   1 1561.59 366.274  28 
   0 -24   1 1626.92 402.902   9 
   0 -24  -1 1981.62 407.022   9 
   0 -24   1 1658.16 386.556  26 
   0  24   1 2122.68 444.219  31 
   0 -24  -1 1769.30 396.458  26 
   0  24  -1 2005.24 481.325  31 
   0 -24  -2 9739.69 770.748  32 
   0 -24   2 9550.87 788.361   9 
   0  24   2 10893.3 787.715  31 
   0 -24   2 9206.61 760.341  32 
   0  24  -2 10025.3 838.987  31 
   0  24  -2 8931.38 730.587  28 
   0 -24  -2 10743.1 784.840   9 
   0 -24  -2 8822.26 716.411  26 
   0  24   2 8262.12 707.267  28 
   0 -24   3 3325.56 455.932  27 
   0 -24   3 3097.28 538.834   9 
   0 -24  -3 2543.57 408.776  26 
   0  24   3 2465.00 428.553  28 
   0 -24  -3 3344.94 490.784   9 
   0  24  -3 2298.76 483.283  31 
   0 -24  -3 3104.08 476.055  32 
   0 -24   3 2587.08 468.646  32 
   0  24   3 3256.49 448.192  31 
   0  24  -4 42566.1 1586.85  31 
   0 -24   4 45079.2 1479.26  27 
   0 -24  -4 43060.9 1407.83  26 
   0 -24  -4 45774.0 1470.02  32 
   0 -24   4 46845.2 1566.85   9 
   0  24   4 44239.7 1462.91  28 
   0  24   4 41586.7 1353.72  34 
   0 -24   4 44557.4 1538.60  32 
   0 -24  -4 50164.0 1448.62   9 
   0  24   5 1179.82 278.774  34 
   0 -24  -5 1687.95 350.910  32 
   0 -24   5 1009.52 329.868   9 
   0  24  -5 950.087 348.254  31 
   0  24  -5 1196.08 399.261  20 
   0 -24  -5 1387.81 303.649  26 
   0 -24  -5 1498.50 289.992   9 
   0 -24   5 1633.16 330.025  27 
   0  24   5 1441.78 361.880  28 
   0 -24   5 1271.57 345.715  32 
   0  24  -6 377.967 210.531  29 
   0  24  -6 488.745 250.385  31 
   0  24   6 546.522 274.048  28 
   0 -24   6 147.626 204.554  32 
   0 -24   6 502.078 273.380   9 
   0 -24   6 307.567 220.371  27 
   0  24  -6 646.789 324.574  20 
   0  24   6 251.401 176.635  34 
   0 -24  -6 292.156 194.688  26 
   0 -24  -6 481.347 218.150  32 
   0 -24   7 2069.96 306.470  32 
   0  24  -7 2190.82 300.671  29 
   0  24  -7 2192.22 351.834  20 
   0 -24  -7 2525.07 288.862  32 
   0  24  -7 1702.33 243.587  31 
   0 -24  -7 2581.36 300.949  26 
   0 -24   7 2282.85 325.245  27 
   0  24   7 1774.52 265.581  34 
   0  24   7 2417.16 316.345  28 
   0 -24  -7 2250.88 308.083  18 
   0  25   0 433.755 336.170  31 
   0  25   0-226.333 285.936  28 
   0 -25   0-251.912 310.489  32 
   0 -25   0-99.8276 282.866   9 
   0 -25   0 10.6510 228.910  26 
   0  25  -1 1726.33 442.847  31 
   0 -25  -1 887.238 328.126   9 
   0 -25   1 1413.82 372.954   9 
   0 -25  -1 831.694 291.141  26 
   0 -25   1 1059.85 318.470  26 
   0  25  -1 999.876 300.356  28 
   0 -25   1 934.330 347.890  32 
   0  25   1 1572.79 403.561  31 
   0 -25  -1 925.016 344.089  32 
   0  25   1 904.892 309.325  28 
   0  25   2 639.599 274.695  28 
   0 -25  -2 540.413 260.496  26 
   0  25  -2 573.642 257.565  28 
   0 -25  -2 893.209 299.276   9 
   0  25   2 1001.78 330.218  31 
   0 -25   2 1228.79 363.480   9 
   0  25  -2 980.679 394.592  31 
   0 -25   2 787.184 331.002  32 
   0 -25  -2 1085.41 342.082  32 
   0 -25  -3 18822.7 965.134  32 
   0 -25  -3 16082.5 874.077  26 
   0 -25   3 17747.5 980.733   9 
   0  25   3 16378.5 905.203  28 
   0  25   3 18321.7 875.267  31 
   0 -25  -3 18596.9 900.195   9 
   0  25  -3 17076.0 1002.70  31 
   0 -25   3 16230.5 929.051  32 
   0  25  -4 302.325 283.450  31 
   0  25   4 592.802 272.016  28 
   0 -25   4 970.037 346.735   9 
   0 -25  -4 857.184 317.938  32 
   0 -25  -4 361.253 218.734  26 
   0 -25   4 673.743 240.144  27 
   0 -25  -4 804.709 254.303   9 
   0  25  -4 811.336 371.446  20 
   0 -25   4 692.321 289.062  32 
   0  25   5 11728.1 700.180  28 
   0  25  -5 11068.4 663.006  29 
   0  25  -5 11520.5 759.555  20 
   0  25  -5 11563.2 734.918  31 
   0 -25   5 12484.7 708.969  27 
   0 -25   5 12324.5 728.322  32 
   0 -25  -5 11874.8 664.364  26 
   0 -25   5 11635.5 747.494   9 
   0 -25  -5 12886.3 699.777  32 
   0 -25  -5 13788.0 641.423   9 
   0 -25   6 1234.11 248.731  27 
   0  25  -6 1205.85 250.958  29 
   0 -25   6 1132.37 255.734  32 
   0  25   6 1472.97 277.835  28 
   0  25  -6 1220.89 254.653  31 
   0 -25  -6 1356.13 279.281  18 
   0  25  -6 1344.75 306.098  20 
   0 -25  -6 1226.75 235.951  26 
   0 -25   6 1299.43 292.006   9 
   0 -25  -6 1666.91 263.967  32 
   0 -26   0 1848.59 373.473  18 
   0  26   0 1216.54 326.824  28 
   0 -26   0 1033.06 344.917  32 
   0  26   0 1526.65 407.036  31 
   0 -26   0 1094.56 291.032  26 
   0 -26   0 905.565 302.760   9 
   0 -26  -1 235.213 220.588   9 
   0  26  -1 382.892 210.547  28 
   0 -26  -1 274.996 226.373  26 
   0  26  -1 450.166 307.090  31 
   0  26   1 434.765 288.597  31 
   0 -26   1 512.038 294.795  32 
   0 -26   1 230.095 242.543   9 
   0 -26  -1 280.330 255.407  32 
   0  26   1 125.156 217.074  28 
   0  26   2 2926.17 417.543  28 
   0 -26  -2 3000.48 403.092  26 
   0  26   2 4555.33 472.233  31 
   0 -26   2 4081.87 496.831  32 
   0 -26   2 3987.83 516.648   9 
   0 -26  -2 3951.30 443.990   9 
   0  26  -2 3968.71 523.236  31 
   0 -26  -2 3462.60 463.159  32 
   0 -26   3 390.663 238.171  32 
   0  26  -3 642.204 271.271  20 
   0 -26  -3 773.026 275.918  32 
   0 -26   3 382.638 285.976   9 
   0  26  -3 325.959 299.404  31 
   0 -26  -3 379.861 209.269  26 
   0 -26  -3 440.741 230.781   9 
   0  26   3 267.409 246.276  28 
   0  26   3 361.762 184.938  31 
   0  26  -4 7722.39 614.546  31 
   0  26  -4 8984.88 627.265  20 
   0 -26   4 8540.76 609.412  32 
   0 -26   4 8268.71 525.188  27 
   0 -26  -4 8213.10 556.278  26 
   0 -26   4 8766.87 626.620   9 
   0 -26  -4 8773.24 512.839   9 
   0  26   4 8376.48 587.239  28 
   0 -26  -4 7882.55 570.521  32 
   0  26  -5-44.3994 129.327  29 
   0  26  -5 57.7122 195.967  31 
   0  26   5 88.2344 185.047  28 
   0 -26   5-135.083 167.999  27 
   0 -26  -5 172.580 211.461  18 
   0 -26  -5 102.857 152.095  26 
   0 -26   5 97.5621 162.900  32 
   0 -26  -5 132.388 172.789  32 
   0 -26   5 71.4647 203.711   9 
   0  26  -5 226.625 224.155  20 
   0  27   0 95.1308 232.658  31 
   0 -27   0 46.3347 231.655  32 
   0 -27   0-103.659 218.673   9 
   0  27   0-6.02708 177.968  28 
   0 -27   0 204.762 181.926  18 
   0  27  -1 5.02610 253.547  31 
   0 -27  -1 238.618 229.436  18 
   0 -27  -1 13.3124 197.297   9 
   0 -27   1 561.589 254.399   9 
   0  27  -1 111.456 177.500  28 
   0 -27   1 108.891 241.857  32 
   0  27   1 278.857 229.149  31 
   0 -27  -1 61.7481 173.421  26 
   0 -27  -1-82.3236 261.445  32 
   0  27   1 158.574 206.114  28 
   0 -27  -2 337.867 234.268  18 
   0 -27  -2-166.064 189.606  26 
   0  27  -2 22.6540 179.220  20 
   0  27   2-174.488 235.969  28 
   0 -27  -2 115.472 170.639   9 
   0 -27  -2-172.553 234.084  32 
   0  27  -2-18.0604 272.630  31 
   0 -27   2 82.0446 208.485  32 
   0  27   2 25.6018 175.309  31 
   0 -27   2 91.7101 223.646   9 
   0 -27  -3 351.959 227.112  18 
   0 -27  -3 96.2350 161.851  26 
   0 -27  -3 73.7308 183.727  32 
   0  27  -3-90.9258 250.414  31 
   0  27  -3 153.616 195.570  20 
   0 -27  -3-116.875 170.754   9 
   0 -27   3 38.8896 196.438   9 
   0 -27   3 283.876 219.484  32 
   0  27   3-257.908 222.722  28 
   0 -27  -4 374.060 209.966  18 
   0  27   4 243.804 173.584  28 
   0  27  -4 503.996 204.270  20 
   0 -27  -4 196.530 140.011  26 
   0 -27   4 367.923 190.697  32 
   0  27  -4 165.659 197.743  31 
   0  27  -4 156.559 132.735  29 
   0 -27  -4 540.279 188.307  32 
   0 -27   4 154.591 186.071   9 
   0  28   0 457.417 215.273  31 
   0  28   0 771.789 208.353  28 
   0 -28   0 976.003 208.108  18 
   0 -28   0 1070.33 263.058  32 
   0 -28   0 1017.01 230.335   9 
   0 -28  -1 380.620 184.817   9 
   0 -28  -1 266.810 172.865  18 
   0  28   1 12.5638 175.998  31 
   0 -28   1 214.527 206.798  32 
   0 -28  -1 429.359 217.593  32 
   0 -28   1 141.167 166.790   9 
   0  28   1 67.3466 147.721  28 
   0  28  -1 32.8130 218.134  31 
   0  28   2 2712.56 286.146  31 
   0  28  -2 2823.00 366.808  31 
   0 -28  -2 2655.39 337.432  18 
   0 -28   2 2712.90 338.286  32 
   0 -28   2 3283.27 353.654   9 
   0  28  -2 2626.47 272.186  20 
   0 -28  -2 3087.91 290.405   9 
   0  28   2 2473.37 319.140  28 
   0 -28  -2 2294.22 276.701  26 
   0 -28  -2 2522.96 315.946  32 
  -1   0  14-166.253 180.152  16 
  -1   0  14 157.122 146.365  35 
   1   0 -14 86.0090 106.871  29 
   1   0 -14-19.0392 159.720  26 
  -1   0  13 3320.78 390.322  35 
  -1   0  13 2853.16 397.078  16 
   1   0 -13 2855.62 346.210  29 
  -1   0  12 294.050 323.458  16 
  -1   0  12 246.036 273.810  35 
   1   0 -12 228.639 263.653  29 
   1   0 -11 56406.1 1730.38  29 
  -1   0  11 55627.2 1822.72  16 
  -1   0  11 57546.3 1759.69  35 
  -1   0  10 621.200 294.849  38 
   1   0 -10-247.048 242.437  21 
   1   0 -10 12.7639 242.592  36 
  -1   0  10-386.194 365.235  16 
  -1   0  10-73.4490 206.248  35 
  -1   0  10-149.600 211.258  23 
   1   0 -10-101.747 198.993  29 
   1   0 -10 46.3386 182.511   1 
  -1   0  10 23.9604 218.784  22 
   1   0  -9 475.577 253.096   1 
  -1   0   9 308.306 231.352  22 
  -1   0   9 215.172 225.318  38 
   1   0  -9 755.859 312.823  36 
   1   0  -9 215.451 208.221  21 
  -1   0   9 533.152 230.373  23 
  -1   0   8-243.286 291.239  38 
   1   0  -8-2.86552 181.168   1 
  -1   0   8-166.937 242.707  22 
  -1   0   8 32.5448 226.711  23 
   1   0  -8 106.491 227.448  36 
  -1   0   7 8438.54 707.587  38 
  -1   0   7 7196.05 596.240  22 
   1   0  -7 7104.82 619.312  36 
  -1   0   7 8545.15 723.427  23 
   1   0  -7 8167.50 605.908   1 
   1   0  -6-16.2281 198.079  36 
   1   0  -6 50.3553 148.445   1 
  -1   0   6 349.755 274.685  23 
  -1   0   6 305.998 265.603  38 
  -1   0   6-31.6379 169.726  22 
   1   0  -5 65121.1 1366.09   1 
  -1   0   5 63378.5 1777.20  23 
  -1   0   5 65143.4 1419.06  22 
   1   0  -5 65833.9 1619.17  36 
  -1   0   4-19.6142 175.648  23 
  -1   0   4 15.8295 466.061  38 
   1   0  -4-60.4510 121.954   1 
   1   0  -4 101.999 162.654  36 
  -1   0   4 40.1715 121.429  22 
  -1   0   3 430917. 2748.13  22 
   1   0  -3 434958. 3298.43  36 
  -1   0   3 414430. 3510.84  23 
   1   0  -3 419138. 2668.67   1 
  -1   0   2 925.186 138.140  23 
  -1   0   2 1269.47 194.340  38 
  -1   0   2 984.455 138.684  39 
  -1   0   2 596.947 108.336  22 
  -1   0   2 923.236 125.503   5 
   1   0  -2 973.679 62.1369  40 
   1   0  -2 783.613 111.173   1 
   1   0  -2 887.583 149.306  36 
  -1   0   1 445358. 1880.68  38 
   1   0  -1 446584. 1610.06   1 
  -1   0   1 442150. 1624.97  22 
  -1   0   0 208.268 43.4248  24 
  -1   0   0 136.430 38.0856   3 
  -1   0   0 159.172 49.1302  39 
  -1   0  -1 624645. 2261.15   1 
  -1   0  -1 623913. 2362.41  36 
   1   0   2 63.9123 62.3349  22 
  -1   0  -2 134.370 88.7696   1 
   1   0   2 268.823 122.922  23 
  -1   0  -2 81.5123 87.9159  36 
  -1   0  -3 7713.24 424.238   1 
  -1   0  -3 7874.24 494.835  36 
   1   0   3 7526.93 369.859  22 
   1   0   3 8038.61 485.024  23 
  -1   0  -4 129.417 140.859   1 
   1   0   4 128.982 114.856  22 
  -1   0  -4 371.068 208.590  36 
   1   0   4 245.121 161.443  23 
  -1   0  -5 1204.33 305.272  36 
   1   0   5 1455.48 291.489  23 
   1   0   5 1239.08 226.364  22 
  -1   0  -5 1804.98 286.613   1 
   1   0   6-506.837 197.333  22 
  -1   0  -6-62.6433 177.095   1 
  -1   0  -6 374.447 257.576  36 
   1   0   6 69.1752 199.941  23 
   1   0   7 274441. 3441.22  22 
  -1   0  -7 275772. 3605.34   1 
  -1   0  -8 299.874 269.849  36 
   1   0   8 206.531 239.624  22 
   1   0   8 712.366 325.683  38 
  -1   0  -8 357.393 270.623   1 
   1   0   8 850.119 328.615  23 
   1   0   9 119787. 2467.22  23 
   1   0   9 121692. 2712.33  35 
   1   0   9 121132. 2610.51  22 
   1   0   9 118730. 2564.12  38 
  -1   0  -9 130287. 2741.51   1 
  -1   0  -9 122367. 2650.68  29 
  -1   0  -9 120867. 2630.05  36 
   1   0  10-247.468 252.943  34 
  -1   0 -10-139.926 223.598  29 
   1   0  10-482.951 302.563  16 
  -1   0 -10 40.8498 229.665  17 
   1   0  10-57.6448 213.637  35 
  -1   0 -11 1124.04 315.668  17 
   1   0  11 733.086 276.654  16 
   1   0  11 1153.48 289.582  34 
   1   0  11 957.812 320.032  35 
  -1   0 -11 749.716 289.255  29 
  -1   0 -12-31.9838 169.309  17 
  -1   0 -12 9.85398 223.274  29 
   1   0  12-109.615 182.059  34 
   1   0  12 238.691 257.251  35 
   1   0  13 5738.06 480.930  35 
   1   0  13 4386.88 375.864  16 
  -1   0 -13 5232.78 422.756  26 
   1   0  13 5701.02 405.083  34 
  -1   0 -13 5218.93 433.973  29 
  -1   1  14 1224.22 234.318  16 
  -1   1  14 1413.18 226.870  35 
   1   1 -14 1262.60 242.334  26 
   1  -1 -14 1155.42 233.155  26 
  -1  -1  14 1068.35 230.816  16 
  -1  -1  14 1366.06 224.273  35 
   1  -1 -14 1149.62 188.913  29 
   1   1 -14 1202.98 200.715  29 
  -1  -1  13 852.942 256.637  35 
  -1   1  13 692.106 272.332  16 
   1  -1 -13 678.884 220.798  29 
   1   1 -13 502.326 212.592  29 
  -1   1  13 923.928 264.861  35 
  -1  -1  13 1463.70 342.377  16 
  -1   1  12 33181.4 1269.92  35 
  -1   1  12 33482.1 1331.77  16 
  -1  -1  12 33140.5 1359.71  16 
   1   1 -12 33967.4 1238.02  29 
  -1  -1  12 33844.1 1271.82  35 
   1  -1 -12 33848.5 1230.99  29 
  -1   1  11 3734.91 519.628  16 
  -1  -1  11 4638.16 538.180  27 
  -1  -1  11 5107.07 576.503  35 
  -1  -1  11 3854.87 556.423  16 
  -1   1  11 4917.59 555.778  35 
   1  -1 -11 4599.34 527.394  29 
   1   1 -11 4435.65 545.868  29 
  -1   1  10 19907.4 1092.68  35 
   1   1 -10 18932.9 1023.96  36 
   1  -1 -10 20040.9 1047.11  36 
  -1  -1  10 19652.0 1090.69  27 
   1  -1 -10 20897.2 1093.69  21 
   1  -1 -10 15755.7 955.769  29 
  -1   1  10 20713.3 1134.24  38 
   1  -1 -10 15488.7 946.958   1 
   1   1 -10 20333.5 1088.50  29 
  -1  -1  10 19038.3 1093.24  23 
  -1   1  10 19485.3 1114.05  16 
  -1   1  10 19324.0 1066.33  23 
   1   1 -10 15239.4 937.905   1 
  -1  -1  10 21018.0 1158.11  38 
  -1  -1  10 20997.1 1121.30  35 
  -1   1  10 18635.8 1091.61  22 
   1   1 -10 20404.7 1088.95  21 
  -1  -1  10 19192.1 1127.49  16 
  -1  -1   9 243.569 225.608  22 
  -1  -1   9-274.245 277.269  38 
   1   1  -9 4.24008 191.005   1 
  -1   1   9-320.572 278.569  38 
   1  -1  -9 255.058 275.395  36 
  -1   1   9-200.143 262.033  22 
   1   1  -9 444.973 276.873  36 
  -1   1   9 18.0736 202.414  23 
  -1  -1   9-209.539 274.462  23 
   1   1  -9-203.297 211.523  21 
   1  -1  -9 29.3384 209.465   1 
   1   1  -8 396.656 217.364   1 
   1   1  -8 474.950 282.809  36 
  -1   1   8 370.094 238.641  23 
  -1   1   8 379.993 234.937  38 
   1   1  -8 167.127 201.164  21 
   1  -1  -8 307.200 208.816   1 
  -1  -1   8 473.837 259.441  23 
  -1   1   8 49.1044 197.131  22 
  -1  -1   8 92.3000 194.589  22 
  -1  -1   8 228.071 212.884  38 
   1  -1  -8 641.715 276.337  36 
  -1   1   7 914.034 294.223  23 
   1   1  -7 796.557 235.343   1 
  -1  -1   7 1043.53 356.834  23 
  -1  -1   7 777.884 287.207  38 
   1  -1  -7 748.378 247.143   1 
   1   1  -7 896.822 284.223  36 
   1  -1  -7 578.619 248.343  36 
  -1  -1   7 632.191 247.369  22 
  -1   1   7 434.868 209.611  22 
  -1   1   7 654.552 283.404  38 
   1   1  -6 42054.0 1204.88   1 
  -1   1   6 45984.3 1633.91  38 
   1  -1  -6 40161.0 1224.66   1 
  -1   1   6 40321.3 1252.44  22 
   1   1  -6 34178.8 1260.38  36 
  -1  -1   6 40563.8 1559.83  38 
   1  -1  -6 35843.3 1263.59  36 
  -1  -1   6 41247.5 1236.34  22 
  -1   1   6 42186.2 1490.88  23 
  -1  -1   6 39300.6 1492.96  23 
   1   1  -5 59.7433 116.331   1 
  -1  -1   5 298.450 254.447  23 
  -1  -1   5-27.1093 152.612  22 
   1  -1  -5 76.5805 140.197   1 
   1  -1  -5 242.734 211.266  36 
  -1  -1   5 311.408 336.720  38 
  -1   1   5 46.2980 164.194  22 
   1   1  -5 205.807 179.335  36 
  -1   1   5 234.405 197.489  23 
  -1   1   5 101.822 306.821  38 
  -1   1   4 255234. 4782.63  38 
   1  -1  -4 240284. 2760.54  36 
  -1  -1   4 245420. 2360.40  22 
  -1  -1   4 223259. 3010.34  23 
   1   1  -4 241834. 2265.49   1 
  -1  -1   4 203762. 4205.05  38 
  -1   1   4 214207. 2994.89  23 
   1   1  -4 239505. 2779.94  36 
  -1   1   4 247981. 2503.18  22 
   1  -1  -4 237467. 2448.84   1 
  -1  -1   3 5364.81 565.684  38 
  -1  -1   3 6391.42 445.759  23 
   1   1  -3 6382.79 409.439  36 
   1   1  -3 5987.00 327.869   1 
  -1   1   3 5671.25 579.239  38 
   1  -1  -3 5717.25 218.684  40 
   1  -1  -3 6430.90 374.088   1 
  -1  -1   3 6466.82 340.760  22 
  -1   1   3 6465.34 469.520  23 
  -1   1   3 6327.84 367.079  22 
   1  -1  -3 6371.34 420.057  36 
  -1   1   2 211367. 1701.89  22 
  -1   1   2 215278. 1473.65   5 
   1   1  -2 205524. 1866.39  36 
   1   1  -2 216470. 1419.26   1 
  -1  -1   2 212054. 1545.82  22 
   1  -1  -2 215709. 1725.49   1 
  -1   1   2 225534. 1824.87  23 
  -1  -1   2 202697. 2056.81  38 
   1  -1  -2 201210. 1913.26  36 
  -1  -1   2 217596. 1836.05  23 
  -1   1   2 216380. 1633.02  39 
  -1   1   2 200293. 2077.49  38 
   1  -1  -2 217281. 1324.29  40 
   1  -1  -1 4855.29 166.444  40 
   1   1  -1 4369.47 119.926   1 
  -1  -1   1 4779.74 168.699  22 
   1  -1  -1 4384.01 173.626   1 
  -1  -1   1 4822.90 168.486  24 
  -1   1   1 4993.65 206.635  38 
  -1  -1   1 5004.38 200.777  38 
   1   1  -1 4859.73 214.445  36 
  -1  -1   1 5106.05 247.123  39 
  -1   1   1 5024.81 225.574  39 
  -1   1   1 4941.79 202.016  22 
  -1  -1   0 312853. 897.890   1 
   1   1   0 314584. 978.568  21 
  -1  -1   0 307506. 1508.33  39 
   1   1   0 308897. 1154.78  37 
   1  -1   0 305243. 1390.01  23 
  -1   1   0 308753. 1359.80   3 
  -1  -1   0 312281. 1499.95  24 
  -1   1   0 313508. 1803.13  39 
  -1  -1   0 312598. 1361.89   3 
  -1  -1  -1 465.455 65.1513   5 
  -1   1  -1 446.073 71.1424   1 
  -1   1  -1 534.693 114.489  39 
  -1  -1  -1 440.847 77.5515   1 
   1   1   1 444.818 92.3764  23 
  -1  -1  -1 515.234 77.5375  36 
   1  -1   1 394.990 98.6888  23 
   1  -1   1 383.381 48.6127  22 
  -1  -1  -1 468.567 62.8417  39 
   1   1   1 416.385 65.2590  22 
   1   1   1 437.860 52.0503  37 
  -1   1  -1 344.028 70.5420  36 
  -1   1  -1 499.792 42.1750  21 
   1   1   2 8512.96 289.452  37 
   1  -1   2 8147.44 288.611  22 
   1   1   2 8254.61 325.351  22 
   1  -1   2 7320.13 408.731  23 
  -1  -1  -2 8586.92 282.649  39 
  -1   1  -2 8118.32 349.653   1 
  -1  -1  -2 7952.73 417.529  36 
  -1  -1  -2 8146.61 368.858   1 
   1   1   2 8066.89 402.750  23 
  -1   1  -2 8487.09 386.938  36 
   1  -1   3 16.2083 73.7014  22 
  -1   1  -3 57.8358 120.154  36 
  -1  -1  -3 78.0420 141.515  36 
  -1  -1  -3 78.0122 105.442   1 
   1   1   3 144.737 142.411  23 
  -1  -1  -3 32.5809 56.8461  39 
   1  -1   3-43.2227 148.092  23 
  -1   1  -3 20.9650 97.5893   1 
   1   1   3 34.5599 87.9458  22 
  -1   1  -4 4369.89 425.626  36 
   1  -1   4 4310.63 325.324  22 
  -1  -1  -4 4497.10 379.151   1 
   1   1   4 4751.01 353.884  22 
   1  -1   4 4422.27 410.872  23 
  -1  -1  -4 4702.48 485.549  36 
  -1   1  -4 4441.63 368.374   1 
   1   1   4 4844.78 402.891  23 
   1  -1   5 1282.63 278.210  23 
  -1  -1  -5 1724.58 353.001  36 
   1   1   5 1432.31 262.621  23 
   1  -1   5 1173.73 216.855  22 
  -1   1  -5 1413.73 266.209   1 
  -1   1  -5 1278.46 300.690  36 
  -1  -1  -5 1310.34 256.541   1 
   1   1   5 953.346 195.129  22 
   1  -1   6 100795. 1893.73  22 
  -1  -1  -6 102495. 2057.70   1 
  -1   1  -6 98561.2 2158.91  36 
   1   1   6 100539. 1937.13  23 
   1  -1   6 96737.4 2013.12  23 
   1   1   6 102754. 1948.30  22 
  -1   1  -6 104172. 2067.75   1 
  -1   1  -7 12789.6 829.899  36 
  -1  -1  -7 11587.6 773.083   1 
   1  -1   7 11514.2 721.952  22 
  -1   1  -7 12479.7 794.352   1 
   1   1   7 11538.4 727.171  22 
   1  -1   7 11809.2 753.411  23 
  -1  -1  -7 13731.5 851.152  36 
   1   1   7 12083.3 721.725  23 
  -1   1  -7 13915.8 731.865  21 
   1  -1   8 237258. 3514.96  38 
   1  -1   8 228160. 3335.01  23 
  -1   1  -8 249367. 3713.57  36 
  -1  -1  -8 252108. 3678.56   1 
  -1  -1  -8 245573. 3600.95  36 
   1  -1   8 249637. 3527.50  22 
   1   1   8 242201. 3508.96  22 
  -1   1  -8 251219. 3645.63   1 
   1   1   8 241048. 3251.07  23 
   1   1   8 239864. 3506.78  38 
   1   1   9 14877.9 936.637  22 
  -1   1  -9 15387.7 958.003  29 
  -1  -1  -9 13757.0 935.411   1 
   1   1   9 14753.1 917.250  38 
   1   1   9 15442.7 975.685  35 
  -1   1  -9 15994.9 972.991   1 
  -1  -1  -9 14561.4 915.340  29 
   1   1   9 14730.2 871.860  23 
   1   1   9 15957.2 961.760  34 
   1  -1   9 15204.3 908.663  23 
  -1  -1  -9 14177.7 907.993  36 
   1  -1   9 14575.3 918.291  38 
   1  -1   9 14418.3 957.732  35 
  -1   1  -9 13548.2 900.743  36 
   1   1  10 2714.54 455.924  16 
  -1  -1 -10 2450.04 421.494  29 
   1  -1  10 2896.36 476.958  35 
   1   1  10 2588.45 428.493  34 
  -1   1 -10 2381.11 433.059  29 
   1   1  10 2768.28 451.736  35 
  -1   1 -10 3362.17 496.185  17 
   1  -1  10 2305.42 415.781  16 
   1  -1  10 2916.68 433.064  34 
  -1  -1 -10 2602.44 419.970  17 
   1   1  11 1066.60 340.696  35 
  -1  -1 -11 943.724 278.851  17 
  -1  -1 -11 938.642 300.201  29 
  -1   1 -11 1141.32 311.340  17 
   1  -1  11 1027.33 328.846  16 
   1  -1  11 1044.62 326.232  35 
   1   1  11 1052.14 311.593  34 
   1  -1  11 1078.93 306.231  34 
  -1   1 -11 813.260 307.938  29 
   1   1  11 936.010 310.767  16 
  -1  -1 -12 302.403 192.793  17 
  -1  -1 -12-12.3544 188.341  26 
   1  -1  12 356.678 188.190  34 
   1   1  12-211.565 257.989  16 
   1   1  12 114.250 197.488  34 
  -1   1 -12 193.591 206.837  17 
   1  -1  12 218.668 238.482  16 
  -1  -1 -12 66.5653 222.180  29 
   1  -1  12 174.774 248.357  35 
   1   1  12 590.619 296.214  35 
  -1   1 -12 19.9276 207.381  29 
   1   1  13 1693.02 244.314  34 
   1  -1  13 1697.52 300.165  35 
   1   1  13 737.886 197.629  16 
  -1  -1 -13 1239.52 239.719  26 
   1   1  13 1440.33 277.298  35 
  -1  -1 -13 1452.02 278.678  29 
   1  -1  13 1015.63 223.063  16 
  -1   1 -13 1551.51 272.429  29 
  -1   1 -13 1347.39 260.761  26 
  -1   2  14 77.5347 146.049  35 
   1  -2 -14 181.889 114.559  29 
   1  -2 -14-13.6989 144.615  26 
  -1  -2  14-428.207 204.634  16 
   1   2 -14 155.221 141.134  29 
   1   2 -14-28.5244 141.424  26 
  -1   2  14-321.864 196.872  16 
  -1  -2  14 67.4397 118.929  35 
   1   2 -13 335.783 195.714  29 
  -1   2  13 298.015 214.873  35 
  -1   2  13 226.637 223.926  16 
   1  -2 -13 439.416 191.524  29 
   1  -2 -13 416.985 233.713  26 
  -1  -2  13 387.010 214.998  35 
  -1  -2  13 564.229 281.513  16 
  -1  -2  12 6852.90 622.342  35 
  -1  -2  12 6292.38 590.410  27 
  -1   2  12 7394.12 638.138  16 
   1   2 -12 6549.52 615.617  29 
  -1  -2  12 6704.22 660.391  16 
  -1   2  12 6646.89 599.846  35 
   1  -2 -12 6773.82 572.912  29 
  -1   2  11 18050.7 1002.19  35 
  -1  -2  11 17636.6 1016.13  35 
  -1  -2  11 19027.0 1062.98  27 
   1   2 -11 18327.0 1009.22  29 
   1  -2 -11 19622.1 1013.15  29 
  -1   2  11 17941.1 1033.93  16 
  -1  -2  11 17236.8 1048.59  16 
  -1   2  10 2041.10 411.542  22 
  -1   2  10 2652.88 446.143  38 
   1  -2 -10 1625.91 323.049  21 
   1  -2 -10 2551.17 423.257  29 
   1   2 -10 1827.74 359.218  36 
   1  -2 -10 1903.41 366.316   1 
  -1  -2  10 2661.40 468.364  27 
   1   2 -10 1603.92 333.447  21 
  -1  -2  10 1432.66 367.492  16 
  -1   2  10 1720.04 395.896  16 
   1   2 -10 1443.58 341.268  29 
  -1  -2  10 2349.12 433.958  35 
  -1   2  10 1544.80 342.795  23 
  -1  -2  10 2236.92 439.138  38 
   1  -2 -10 2245.60 418.273  36 
  -1  -2  10 1442.63 362.750  23 
  -1   2  10 2386.68 415.028  35 
   1   2  -9 2092.43 371.982  21 
   1  -2  -9 2330.08 424.134  36 
   1   2  -9 2304.69 386.434   1 
  -1   2   9 1586.32 357.645  38 
   1  -2  -9 2116.27 391.205   1 
  -1  -2   9 1293.08 323.922  23 
  -1  -2   9 1771.38 377.046  38 
  -1   2   9 1568.44 350.285  22 
  -1   2   9 1730.21 353.587  23 
   1   2  -9 1784.52 377.213  36 
   1  -2  -8 7821.59 681.267  36 
  -1  -2   8 8541.61 739.432  38 
  -1  -2   8 7909.03 660.290  22 
   1   2  -8 8487.98 674.055   1 
   1   2  -8 8807.30 702.007  36 
   1   2  -8 8878.22 680.130  21 
  -1   2   8 9146.50 748.371  38 
   1  -2  -8 7457.46 630.033   1 
  -1   2   8 7824.52 662.447  22 
  -1   2   8 9632.82 705.947  23 
  -1  -2   8 8364.73 745.371  23 
   1   2  -7 866.545 255.689   1 
   1  -2  -7 345.362 225.007  36 
   1  -2  -7 535.675 215.168   1 
  -1   2   7 374.588 243.328  38 
   1   2  -7 706.392 283.508  36 
  -1   2   7 251.966 201.024  22 
  -1  -2   7 596.280 291.168  23 
  -1  -2   7 667.471 296.044  38 
  -1   2   7 857.232 279.759  23 
  -1  -2   7 644.467 249.000  22 
   1   2  -7 524.367 202.403  21 
  -1   2   6 3704.76 430.132  22 
   1   2  -6 4002.09 468.819  36 
  -1  -2   6 3616.74 555.140  38 
  -1   2   6 4450.88 559.005  38 
   1   2  -6 3561.56 383.725   1 
  -1  -2   6 4246.62 539.862  23 
   1  -2  -6 4034.02 465.438  36 
  -1   2   6 5274.90 550.930  23 
   1  -2  -6 4408.09 431.642   1 
  -1  -2   6 3568.92 389.714  22 
   1  -2  -5 74311.2 1677.82  36 
  -1  -2   5 69162.5 2219.60  38 
   1  -2  -5 69427.7 1500.91   1 
  -1  -2   5 67046.3 1830.25  23 
  -1   2   5 75241.3 1906.53  23 
   1   2  -5 65785.0 1601.21  36 
  -1   2   5 71471.6 1533.67  22 
  -1  -2   5 72084.3 1451.53  22 
   1   2  -5 72111.4 1405.68   1 
  -1  -2   4 9530.54 478.924  22 
   1  -2  -4 9210.38 556.445  36 
   1  -2  -4 9091.77 338.366  40 
  -1   2   4 10459.8 872.057  38 
   1   2  -4 8886.53 448.683   1 
  -1   2   4 9068.10 512.999  22 
  -1   2   4 9138.42 629.274  23 
   1  -2  -4 9019.97 507.881   1 
  -1  -2   4 9807.36 646.949  23 
   1   2  -4 8827.42 561.762  36 
  -1  -2   4 7752.61 777.106  38 
  -1   2   3 8118.25 645.824  38 
   1  -2  -3 7004.54 443.537  36 
  -1   2   3 7048.50 393.518  22 
   1   2  -3 6439.84 309.830   1 
   1  -2  -3 7224.74 320.943  40 
  -1  -2   3 7125.05 462.224  23 
  -1  -2   3 7075.98 357.073  22 
  -1   2   3 7639.07 331.392  39 
   1   2  -3 7331.62 434.870  36 
  -1  -2   3 7456.55 597.526  38 
   1  -2  -3 7034.71 393.298   1 
  -1   2   3 6984.98 493.217  23 
  -1   2   3 7242.91 279.956   5 
  -1   2   2 89.9458 60.9702  39 
  -1   2   2 158.694 85.3499  23 
  -1  -2   2 17.7827 80.0036  23 
  -1  -2   2 41.4246 60.1655  22 
  -1   2   2 122.953 103.070  38 
  -1  -2   2 50.1267 59.6944  25 
  -1  -2   2 54.3586 29.5973  40 
  -1  -2   2 147.653 109.096  38 
   1  -2  -2 63.9721 79.4368  36 
   1   2  -2 75.3572 90.9471  36 
   1  -2  -2 9.27547 78.4046   1 
  -1   2   2 221.996 96.9687  22 
   1   2  -2 8.27772 47.6512   1 
   1  -2  -2 69.3216 74.9497  40 
  -1   2   1 124799. 1172.05  39 
   1   2  -1 122725. 970.914  21 
  -1   2   1 127220. 1154.96  22 
  -1   2   1 120199. 1016.13  38 
  -1   2   1 123552. 1281.21  37 
   1  -2  -1 120981. 1026.74  40 
  -1  -2   1 120431. 866.964  25 
  -1  -2   1 122726. 1004.52  24 
  -1  -2   1 121806. 987.268   4 
  -1   2   1 123442. 1010.22   4 
   1   2  -1 125519. 993.071  36 
  -1   2   1 122829. 992.573   2 
   1   2  -1 121521. 1014.99  37 
  -1  -2   1 123613. 975.222  38 
  -1  -2   1 115349. 1035.19  40 
  -1  -2   0 4837.55 208.526  39 
  -1  -2   0 4486.77 165.496   3 
  -1   2   0 4757.78 180.328  21 
  -1   2   0 5173.15 224.727  37 
  -1   2   0 4114.66 158.471   3 
  -1   2   0 5514.84 280.805  39 
   1  -2   0 4735.11 184.878  23 
   1   2   0 4928.82 178.974  37 
   1   2   0 4665.71 160.290  21 
  -1   2   0 4280.07 176.886   2 
  -1  -2   0 4660.75 208.967  24 
  -1   2   0 4607.89 144.433  25 
   1  -2   0 4716.68 210.973  40 
  -1  -2   0 4642.99 250.244  40 
  -1  -2   0 4438.17 152.689   1 
  -1  -2  -1 11117.0 413.076  40 
  -1  -2  -1 11719.9 401.325  24 
   1   2   1 11500.7 304.763  21 
   1   2   1 11641.0 376.194  23 
   1   2   1 12621.9 312.538  37 
  -1  -2  -1 11202.5 355.195   1 
  -1   2  -1 12056.0 247.279  21 
  -1   2  -1 11985.8 357.670  36 
  -1   2  -1 11946.5 232.653  37 
  -1  -2  -1 11114.0 296.166   5 
   1   2   1 11686.9 333.744  22 
  -1  -2  -1 12567.1 353.647  36 
  -1  -2  -1 12324.7 241.752  39 
   1  -2   1 10752.2 410.532  23 
  -1   2  -2 246.800 58.5475  21 
  -1   2  -2 268.647 42.2772  37 
  -1   2  -2 378.001 107.297  36 
   1   2   2 220.780 89.7580  22 
  -1  -2  -2 310.014 143.888  36 
  -1  -2  -2 155.580 42.5974   5 
  -1   2  -2 129.301 71.5394   1 
  -1  -2  -2 252.058 95.3933   1 
   1   2   2 240.737 75.4185  37 
  -1  -2  -2 215.670 35.0542  39 
   1   2   2 361.447 122.675  23 
   1  -2   2 421.493 88.3653  22 
   1  -2   2 160.292 113.343  23 
   1   2   3 5067.41 362.164  23 
  -1   2  -3 4996.50 325.251   1 
  -1   2  -3 5162.40 268.490  21 
   1  -2   3 5111.15 289.991  22 
  -1   2  -3 5430.03 217.877  37 
  -1  -2  -3 4184.57 412.606  36 
  -1  -2  -3 4781.86 350.907   1 
  -1  -2  -3 5356.19 185.643  39 
   1   2   3 4895.56 321.231  22 
   1  -2   3 4312.08 378.447  23 
  -1   2  -3 5617.29 391.673  36 
   1  -2   4 871.280 232.333  23 
   1   2   4 791.887 195.221  23 
  -1  -2  -4 814.522 89.6765  39 
  -1   2  -4 750.319 184.834   1 
  -1   2  -4 986.240 149.503  21 
   1  -2   4 824.972 167.492  22 
  -1   2  -4 1045.79 221.260  36 
  -1  -2  -4 688.368 241.221  36 
  -1  -2  -4 961.202 208.800   1 
   1   2   4 766.165 171.033  22 
   1   2   5 13230.3 652.921  22 
  -1   2  -5 12605.7 733.649  36 
  -1   2  -5 14380.4 609.910  21 
   1  -2   5 13351.9 630.780  22 
  -1   2  -5 12505.1 677.327   1 
   1   2   5 13880.7 683.365  23 
   1  -2   5 12851.6 736.350  23 
  -1  -2  -5 12338.4 679.572   1 
  -1  -2  -6 5350.82 497.596   1 
  -1   2  -6 5476.58 431.048  21 
   1   2   6 5686.07 483.191  23 
   1  -2   6 5079.56 503.357  23 
  -1   2  -6 5229.79 513.979  36 
  -1  -2  -6 6596.13 618.783  36 
   1  -2   6 5275.70 454.006  22 
   1   2   6 4871.71 455.581  22 
  -1   2  -6 5748.99 502.360   1 
  -1   2  -7 60826.9 1782.92  36 
  -1   2  -7 69078.3 1600.57  21 
  -1  -2  -7 66181.6 1822.30  36 
   1  -2   7 61374.9 1620.46  22 
   1   2   7 61460.1 1563.67  23 
   1  -2   7 57123.1 1657.66  23 
  -1   2  -7 59431.6 1719.69   1 
   1   2   7 62336.3 1664.67  22 
  -1  -2  -7 60556.3 1741.20   1 
  -1  -2  -8 46975.5 1574.35  36 
   1  -2   8 45072.4 1538.36  23 
   1   2   8 49356.6 1445.40  23 
  -1   2  -8 48785.0 1664.70  36 
   1  -2   8 47350.1 1577.63  38 
   1   2   8 47548.0 1559.23  38 
  -1   2  -8 48755.4 1639.72   1 
   1   2   8 50159.6 1602.93  22 
  -1  -2  -8 51792.2 1673.99   1 
   1   2   9 14847.6 926.934  22 
  -1   2  -9 13708.3 911.819  36 
   1   2   9 14503.4 847.782  23 
   1  -2   9 14743.0 959.518  35 
  -1   2  -9 15352.2 972.663  29 
  -1   2  -9 15026.9 962.688  17 
   1   2   9 15458.5 925.588  38 
   1  -2   9 14438.1 911.308  38 
  -1  -2  -9 14037.6 897.112  36 
  -1  -2  -9 16030.9 963.348  29 
  -1  -2  -9 15974.9 971.176   1 
   1  -2   9 13025.0 873.479  16 
   1  -2   9 14147.2 926.787  23 
   1   2   9 15204.3 952.096  35 
   1   2   9 13883.9 902.955  16 
   1   2   9 14502.2 919.492  34 
  -1   2 -10 105.608 237.920  29 
   1   2  10-8.33006 236.673  35 
  -1  -2 -10 101.019 236.257  17 
   1  -2  10 34.4343 245.659  35 
   1  -2  10-225.241 298.788  16 
   1  -2  10 81.9756 202.880  34 
  -1  -2 -10 30.4027 242.119  29 
   1   2  10 83.4933 195.516  34 
  -1   2 -10 91.7017 251.760  17 
   1   2  10 260.821 250.118  16 
   1   2  11 407.640 263.316  34 
   1  -2  11 337.526 287.955  35 
  -1   2 -11 316.136 261.199  17 
  -1  -2 -11 174.178 198.902  17 
  -1   2 -11 195.130 260.701  29 
   1  -2  11 15.8612 251.032  16 
   1   2  11 90.5049 226.166  16 
  -1  -2 -11 138.012 214.287  29 
   1   2  11 356.975 282.206  35 
   1  -2  11 461.689 237.200  34 
  -1   2 -12 2634.24 379.272  17 
   1   2  12 2707.98 418.374  35 
   1  -2  12 2723.34 411.123  35 
  -1  -2 -12 2615.53 379.975  29 
   1  -2  12 2869.44 405.888  16 
  -1  -2 -12 2624.24 392.183  26 
  -1   2 -12 2713.30 402.668  29 
   1  -2  12 2717.09 349.925  34 
   1   2  12 2378.37 352.010  16 
   1   2  12 3206.90 399.706  34 
  -1  -2 -13 3591.60 361.096  29 
  -1   2 -13 3258.30 352.693  26 
  -1   2 -13 4130.46 357.088  17 
   1  -2  13 2392.64 299.862  16 
   1   2  13 2569.81 299.667  16 
   1  -2  13 3523.70 405.429  35 
  -1   2 -13 3410.08 363.525  29 
   1   2  13 4024.80 402.626  35 
   1   2  13 3829.94 347.183  34 
  -1  -2 -13 3399.94 352.060  26 
   1  -3 -14 894.091 159.130  29 
  -1  -3  14 576.010 195.409  16 
   1   3 -14 774.380 174.624  29 
  -1  -3  14 902.330 180.793  35 
  -1   3  14 948.131 212.937  16 
   1  -3 -14 1195.03 220.349  26 
  -1   3  14 1007.38 211.929  35 
   1  -3 -13 1195.10 279.608  26 
  -1  -3  13 1461.62 335.594  16 
   1  -3 -13 1179.20 232.683  29 
   1   3 -13 829.324 244.377  29 
  -1   3  13 866.945 283.390  16 
  -1   3  13 1166.85 269.628  35 
  -1  -3  13 1060.08 260.954  35 
  -1   3  12 3098.74 449.036  16 
  -1   3  12 2810.49 419.305  35 
   1   3 -12 2994.06 428.083  29 
  -1  -3  12 2513.76 453.970  16 
  -1  -3  12 2753.07 427.736  27 
   1  -3 -12 2901.87 387.133  29 
  -1  -3  12 3330.71 450.752  35 
   1   3 -11 4873.88 559.747  29 
  -1   3  11 5430.03 524.992  34 
  -1   3  11 5085.46 589.039  35 
  -1  -3  11 4978.51 579.687  27 
  -1   3  11 4446.34 542.441  16 
   1  -3 -11 5360.00 552.569  29 
  -1  -3  11 4804.11 571.035  35 
  -1  -3  11 3875.35 531.602  16 
  -1  -3  10 3821.69 540.002  35 
  -1   3  10 4819.08 565.279  38 
  -1   3  10 4021.56 510.265  35 
   1   3 -10 3838.93 514.061  29 
   1  -3 -10 4528.33 529.041  29 
   1  -3 -10 4260.90 519.493   1 
   1  -3 -10 4404.85 538.095  36 
  -1   3  10 4015.30 523.215  22 
  -1  -3  10 3664.18 518.735  16 
   1   3 -10 3630.37 476.710  36 
  -1  -3  10 3519.48 528.938  23 
  -1   3  10 4572.53 574.808  16 
  -1  -3  10 4262.51 574.529  27 
  -1   3  10 4433.01 501.844  34 
  -1  -3  10 5082.84 600.428  38 
   1   3 -10 4397.14 530.356  21 
  -1  -3   9 732.816 287.607  23 
  -1   3   9 893.379 300.263  38 
   1   3  -9 1081.90 283.888  21 
   1   3  -9 833.527 271.035  36 
   1  -3  -9 920.429 275.497   1 
   1  -3  -9 1391.01 356.994  36 
  -1  -3   9 976.816 306.750  38 
  -1   3   9 863.048 279.033  22 
  -1   3   9 1262.96 315.184  23 
  -1   3   8 27785.5 1254.67  38 
   1  -3  -8 24624.6 1165.67  36 
   1   3  -8 27445.7 1162.20  21 
   1  -3  -8 26329.0 1145.06   1 
   1   3  -8 26869.0 1143.71   1 
  -1   3   8 25420.7 1155.55  22 
  -1   3   8 28822.2 1155.69  23 
   1   3  -8 25802.3 1169.72  36 
  -1  -3   8 25028.1 1316.71  23 
  -1  -3   8 25842.0 1291.69  38 
  -1  -3   7 787.645 299.611  38 
   1  -3  -7 812.602 250.585   1 
   1   3  -7 682.145 220.508  21 
  -1  -3   7 923.816 281.194  22 
   1  -3  -7 737.218 246.426  36 
   1   3  -7 642.684 222.925   1 
   1   3  -7 1040.26 315.703  36 
  -1   3   7 699.871 245.454  22 
  -1   3   7 1429.87 315.352  23 
  -1  -3   7 801.456 324.828  23 
  -1   3   7 1286.00 325.627  38 
   1   3  -6 13195.7 785.725  36 
  -1   3   6 16317.8 842.061  23 
   1   3  -6 14118.3 737.374  21 
   1  -3  -6 15173.8 839.120  36 
  -1   3   6 13231.9 760.904  22 
  -1  -3   6 13389.7 906.516  23 
   1  -3  -6 13678.5 731.568   1 
  -1  -3   6 14602.1 1024.04  38 
   1   3  -6 14341.8 696.595   1 
  -1  -3   6 13537.8 723.589  22 
  -1   3   6 16854.7 963.218  38 
   1   3  -5 19160.2 882.609  36 
  -1   3   5 22996.2 902.277  22 
  -1  -3   5 20817.0 1162.05  38 
   1  -3  -5 24025.6 613.080  40 
  -1  -3   5 22943.4 1067.98  23 
  -1  -3   5 23530.0 837.900  22 
   1  -3  -5 24108.2 964.431  36 
  -1   3   5 26506.9 1067.53  23 
   1   3  -5 23744.0 849.354  21 
   1   3  -5 23716.8 792.940   1 
  -1   3   5 28277.0 1241.98  38 
   1  -3  -5 23712.9 894.295   1 
  -1  -3   4 2506.61 362.914  23 
  -1  -3   4 2434.96 259.811  22 
   1   3  -4 2370.44 230.060   1 
   1   3  -4 2085.81 277.125  36 
  -1   3   4 2137.42 311.147  23 
  -1   3   4 2210.79 282.168  22 
   1   3  -4 2363.70 254.953  21 
  -1   3   4 2442.03 410.568  38 
   1  -3  -4 2254.03 277.003   1 
  -1  -3   4 1930.10 378.864  38 
   1  -3  -4 2387.62 207.406  40 
   1  -3  -4 2197.90 305.789  36 
  -1   3   3 6633.34 496.650  23 
   1  -3  -3 4923.31 347.583   1 
   1  -3  -3 6611.25 375.173  40 
   1   3  -3 5960.40 397.750  36 
   1  -3  -3 6368.19 431.275  36 
   1   3  -3 6206.58 337.036  21 
  -1   3   3 5886.40 248.663   5 
  -1   3   3 5862.26 401.990  22 
  -1  -3   3 6318.42 504.692  38 
  -1   3   3 6911.94 561.620  38 
  -1   3   3 6754.57 296.393  39 
  -1  -3   3 6111.63 431.019  23 
   1   3  -3 5157.30 271.496   1 
  -1  -3   3 6341.02 346.846  22 
  -1  -3   2 94812.5 1244.58  23 
  -1  -3   2 92848.4 1094.00  40 
  -1  -3   2 93430.0 988.303  25 
   1   3  -2 91499.2 1206.14  36 
   1   3  -2 93140.5 1090.68  21 
   1  -3  -2 95631.2 1260.56   1 
   1   3  -2 94668.2 1088.51  37 
  -1   3   2 93943.5 1291.62  22 
   1  -3  -2 95155.2 1273.38  36 
  -1  -3   2 95744.5 1267.12  38 
  -1   3   2 93443.7 1394.48  37 
  -1   3   2 96884.5 1050.44  39 
   1  -3  -2 95858.7 1284.14  40 
  -1   3   2 95685.7 1350.54  38 
  -1   3   1 24568.2 556.913  39 
   1  -3  -1 26085.0 566.300  40 
  -1  -3   1 24454.3 657.984  40 
   1  -3  -1 23727.4 325.785  24 
  -1  -3   1 23690.7 392.779  25 
   1   3  -1 24144.4 412.196  36 
  -1  -3   1 24201.8 510.205  24 
  -1   3   1 23593.6 443.308   4 
   1   3  -1 23582.5 463.930  21 
  -1  -3   1 24023.8 425.652  38 
  -1   3   1 24413.8 442.560  38 
  -1   3   1 22857.4 475.481   2 
   1   3  -1 24829.6 488.200  37 
  -1   3   1 25455.1 673.021  37 
  -1  -3   1 23288.5 426.827   4 
  -1  -3   0 1261.00 133.715  24 
  -1   3   0 1291.72 78.1502  25 
  -1  -3   0 1634.42 113.892   1 
  -1   3   0 1068.54 85.2155   3 
   1  -3   0 2413.35 135.518  23 
  -1   3   0 1995.67 201.004  39 
   1   3   0 1154.15 98.2058  21 
  -1   3   0 2413.42 187.203  37 
   1  -3   0 1439.80 133.832  40 
  -1  -3   0 1163.03 90.7301   3 
  -1  -3   0 2203.58 217.140  40 
  -1   3   0 1582.89 127.775  21 
  -1   3   0 1074.31 111.457   2 
   1   3   0 1451.02 115.201  37 
   1   3   1 1064.01 132.841  23 
  -1  -3  -1 1062.72 140.363   1 
   1  -3   1 983.588 141.435  23 
   1  -3   1 1215.90 135.425  40 
   1   3   1 1110.56 109.861  21 
  -1   3  -1 920.080 80.1130  25 
  -1   3  -1 1059.67 94.0535  21 
  -1  -3  -1 1111.78 140.377  24 
  -1   3  -1 1179.06 103.059  37 
  -1  -3  -1 1274.23 180.706  40 
  -1   3  -1 1101.09 122.901  36 
  -1  -3  -1 1365.45 146.602  36 
   1   3   1 1260.94 120.591  37 
  -1   3  -2 3975.33 201.605  21 
   1   3   2 3548.15 249.642  22 
  -1  -3  -2 3612.89 275.007   1 
   1   3   2 3936.89 248.801  37 
  -1   3  -2 3475.41 263.110  36 
  -1  -3  -2 4324.72 371.185  36 
  -1   3  -2 4038.90 174.006  37 
   1   3   2 3461.12 264.785  23 
   1  -3   2 3535.21 298.037  23 
  -1  -3  -2 3618.93 289.751  40 
  -1  -3  -2 3471.27 271.430  24 
   1  -3   2 3658.40 232.643  40 
   1  -3   3 1919.99 278.607  23 
  -1  -3  -3 1954.88 245.702   1 
  -1  -3  -3 2181.99 328.161  36 
  -1   3  -3 1795.93 210.359   1 
  -1   3  -3 2378.84 191.268  21 
  -1   3  -3 2089.52 246.389  36 
   1   3   3 2181.51 252.512  23 
   1  -3   3 2067.39 194.688  40 
  -1   3  -3 2202.24 149.808  37 
   1   3   3 2322.49 242.837  22 
   1   3   3 2196.60 215.215  37 
   1   3   4 5552.85 401.010  22 
  -1  -3  -4 4967.69 411.690   1 
  -1   3  -4 5831.27 341.467  21 
   1  -3   4 4784.79 441.146  23 
   1   3   4 5125.62 396.716  23 
  -1  -3  -4 5324.51 524.175  36 
  -1   3  -4 5350.04 269.111  37 
   1  -3   4 5592.05 327.212  40 
  -1   3  -4 5119.67 425.557  36 
  -1   3  -4 5280.62 383.925   1 
  -1  -3  -5-30.2618 156.637   1 
   1   3   5 123.049 145.737  22 
  -1   3  -5 63.3682 195.322  36 
  -1   3  -5 72.5263 98.5573  21 
  -1   3  -5 114.233 165.835   1 
  -1  -3  -5 297.866 280.086  36 
   1  -3   5 310.827 222.674  23 
   1  -3   5 134.584 78.0050  40 
  -1   3  -5 69.0311 59.5721  37 
   1   3   5 203.397 152.999  23 
  -1   3  -6 8117.42 611.656   1 
  -1   3  -6 7893.24 625.646  36 
   1   3   6 9119.27 617.636  22 
  -1   3  -6 9727.85 563.884  21 
  -1  -3  -6 8684.62 635.039   1 
   1   3   6 9337.90 596.461  23 
  -1  -3  -6 10973.6 761.671  36 
   1  -3   6 7639.04 628.693  23 
  -1   3  -7 17450.9 975.407  36 
  -1  -3  -7 19956.2 1003.66  36 
   1  -3   7 17191.2 941.580  23 
   1   3   7 17289.4 891.065  22 
  -1  -3  -7 17477.5 943.737   1 
  -1   3  -7 19243.2 857.222  21 
   1   3   7 19240.5 865.253  23 
   1  -3   8 585.901 264.298  38 
  -1  -3  -8-66.4586 201.499  36 
   1   3   8 174.853 186.069  23 
   1   3   8-287.602 281.701  22 
  -1  -3  -8 225.559 218.832   1 
  -1   3  -8-165.584 282.135  36 
   1   3   8 244.961 210.078  38 
   1  -3   8 457.757 304.552  23 
   1   3   9 9081.34 720.789  38 
   1   3   9 9147.19 678.060  23 
  -1  -3  -9 8807.59 747.065   1 
  -1  -3  -9 9508.46 754.771  29 
  -1   3  -9 6371.67 638.785  17 
   1  -3   9 8258.61 717.347  23 
   1  -3   9 8527.99 717.723  38 
   1   3   9 7844.27 692.430  35 
  -1  -3  -9 7627.93 666.082  36 
   1  -3   9 8999.71 758.261  35 
   1   3   9 8738.66 703.318  22 
   1   3   9 8627.02 718.166  16 
   1   3   9 8921.99 707.167  34 
  -1   3  -9 7954.06 716.324  36 
  -1   3  -9 8209.57 712.030  29 
   1  -3  10 19.9322 271.074  16 
   1  -3  10 177.612 187.084  34 
   1   3  10 480.522 235.177  34 
  -1  -3 -10 686.673 306.834  29 
   1   3  10 728.432 298.872  35 
   1  -3  10 139.746 253.453  35 
  -1   3 -10 588.883 291.443  29 
   1   3  10 464.849 254.581  16 
  -1   3 -10 503.707 265.431  17 
  -1   3 -11 346.128 282.621  17 
  -1  -3 -11 107.649 225.524  29 
   1   3  11 391.158 269.288  35 
   1   3  11 281.742 234.595  34 
  -1   3 -11 376.402 269.029  29 
   1   3  11-101.710 245.474  16 
   1  -3  11-228.269 265.224  16 
   1  -3  11 346.119 261.848  35 
   1  -3  11 181.395 187.999  34 
   1   3  12 3461.29 402.432  16 
   1   3  12 3797.39 473.926  35 
   1   3  12 3672.29 411.226  34 
  -1   3 -12 4543.89 467.061  17 
  -1  -3 -12 3993.18 443.197  26 
  -1   3 -12 4325.83 482.665  29 
   1  -3  12 3792.84 476.368  35 
  -1  -3 -12 3663.65 424.704  29 
   1  -3  12 3804.31 451.502  16 
   1   3  13 93.0368 132.192  34 
   1   3  13-193.217 165.401  16 
  -1   3 -13 41.9973 181.279  29 
  -1   3 -13 147.758 155.303   7 
   1  -3  13-362.908 227.090  16 
   1   3  13 41.1664 178.124  35 
  -1  -3 -13-7.81758 150.604  26 
  -1   3 -13 155.740 137.729  17 
  -1   3 -13 13.8301 154.340  26 
  -1  -3 -13 81.5895 170.636  29 
   1  -3  13 275.603 202.392  35 
  -1   4  14 387.174 188.432  16 
  -1  -4  14 305.839 173.001  16 
  -1  -4  14 399.555 135.070  35 
  -1   4  14 587.885 173.834  35 
   1   4 -14 392.775 150.054  29 
   1  -4 -14 471.291 173.672  26 
  -1  -4  13 1156.62 251.164  27 
  -1   4  13 957.692 246.224  35 
  -1  -4  13 1085.41 255.855  35 
  -1  -4  13 997.862 317.585  16 
   1  -4 -13 1121.61 228.938  29 
   1  -4 -13 965.407 269.491  26 
   1   4 -13 998.491 265.186  29 
  -1   4  13 779.279 265.571  16 
  -1   4  12 1604.10 361.474  16 
  -1   4  12 1528.74 350.578  35 
   1  -4 -12 1656.32 364.829  26 
  -1  -4  12 1516.18 382.005  16 
  -1   4  12 1806.22 316.019  34 
  -1  -4  12 1727.62 355.039  27 
   1   4 -12 2013.18 358.045  29 
   1  -4 -12 1883.41 318.305  29 
  -1  -4  12 1827.93 349.561  35 
  -1  -4  11 358.259 289.358  27 
   1   4 -11 354.808 229.486  29 
  -1  -4  11-81.2778 366.901  16 
   1  -4 -11 572.799 271.041  29 
  -1   4  11 268.325 219.316  35 
  -1  -4  11-155.231 231.080  35 
  -1   4  11 403.626 224.176  34 
  -1   4  11 106.990 265.753  16 
   1   4 -11 461.838 247.617  17 
   1  -4 -10 2744.58 443.571   1 
  -1   4  10 2348.43 433.655  16 
  -1   4  10 2740.89 406.697  34 
   1   4 -10 2543.52 425.378  29 
   1  -4 -10 2496.85 436.935  36 
   1  -4 -10 2531.81 409.722  29 
  -1  -4  10 1712.48 365.056  38 
  -1  -4  10 2134.31 433.566  23 
  -1   4  10 2399.10 427.389  38 
  -1   4  10 1728.53 370.977  22 
  -1  -4  10 2308.76 415.893  35 
  -1   4  10 2868.87 443.804  35 
  -1  -4  10 1742.35 377.285  27 
   1   4 -10 1949.68 368.498  36 
   1   4 -10 2863.92 452.466  17 
   1  -4  -9 6903.02 667.994  36 
  -1  -4   9 6954.24 696.501  38 
   1   4  -9 6826.78 621.677  21 
   1   4  -9 5620.59 593.039  36 
  -1  -4   9 5865.72 679.243  23 
  -1   4   9 6245.60 624.201  22 
  -1   4   9 6821.48 654.411  38 
   1  -4  -9 6053.25 604.632   1 
   1  -4  -8 17710.6 946.436   1 
   1  -4  -8 16833.2 972.431  36 
  -1  -4   8 19076.1 1139.53  38 
  -1   4   8 18371.8 987.148  22 
  -1   4   8 20779.7 953.209  23 
   1   4  -8 16662.8 933.110  36 
  -1  -4   8 16672.0 1116.50  23 
   1   4  -8 19693.5 1004.75  21 
  -1   4   8 19354.7 1040.57  38 
   1   4  -7 381.064 156.016  37 
   1  -4  -7 303.811 214.446   1 
  -1   4   7 580.292 261.796  38 
  -1  -4   7 198.831 237.298  23 
  -1   4   7 889.506 254.926  23 
   1   4  -7 594.464 251.058  36 
  -1  -4   7 252.330 214.230  38 
   1   4  -7 221.618 169.963   1 
   1  -4  -7 381.179 227.679  36 
   1   4  -7 276.056 157.057  21 
  -1   4   7 72.5433 204.913  22 
   1  -4  -6 5206.53 512.881  36 
   1   4  -6 4779.17 445.422  21 
  -1   4   6 5451.34 481.181  23 
   1   4  -6 4544.68 477.554  36 
  -1   4   6 5827.62 579.054  38 
  -1   4   6 4483.34 469.913  22 
  -1  -4   6 4666.16 596.154  38 
   1   4  -6 4474.79 418.120   1 
  -1  -4   6 4275.65 547.719  23 
   1  -4  -6 4661.72 456.047   1 
   1   4  -6 5027.54 418.816  37 
   1  -4  -5 24424.6 919.454   1 
  -1   4   5 29466.9 1202.07  38 
   1   4  -5 25364.2 800.434   1 
   1   4  -5 24554.5 856.952  21 
   1  -4  -5 25718.0 988.768  36 
   1   4  -5 23029.4 926.383  36 
  -1  -4   5 20949.8 1151.14  38 
  -1   4   5 26601.8 1002.92  23 
  -1   4   5 22886.0 939.693  22 
   1   4  -5 24847.6 824.365  37 
  -1  -4   5 23199.1 1097.93  23 
   1  -4  -5 24878.8 703.363  40 
   1  -4  -4 2100.15 299.330  36 
  -1   4   4 2178.90 289.618  22 
   1  -4  -4 1913.49 216.136  40 
   1  -4  -4 2406.32 296.969   1 
  -1   4   4 2332.04 331.118  23 
  -1  -4   4 2053.19 346.006  23 
  -1   4   4 2120.08 135.776   5 
   1   4  -4 1956.44 265.482  36 
   1   4  -4 1890.82 222.247  37 
   1   4  -4 2023.94 219.660   1 
  -1   4   4 2405.72 368.591  38 
   1   4  -4 2424.55 256.170  21 
  -1  -4   4 1888.37 334.492  38 
   1  -4  -3 54279.2 1224.95  36 
   1   4  -3 53991.1 1008.81  21 
  -1  -4   3 55764.8 930.240  40 
   1  -4  -3 56150.5 1172.90   1 
   1   4  -3 50175.8 1051.69  36 
  -1   4   3 56305.9 1174.97  22 
  -1   4   3 57910.7 1431.25  23 
  -1  -4   3 52172.6 1201.72  23 
   1   4  -3 55713.5 978.724  37 
  -1   4   3 56310.3 1466.52  38 
   1  -4  -3 53841.3 1124.74  40 
  -1  -4   3 52754.7 1292.33  38 
  -1   4   3 56670.8 835.632  39 
   1   4  -2 47445.0 820.267  21 
  -1   4   2 52071.5 813.274  39 
   1   4  -2 51558.6 836.832  36 
   1  -4  -2 49102.6 692.518  24 
  -1   4   2 52542.0 964.994  38 
  -1  -4   2 49356.9 695.803  25 
   1  -4  -2 52963.7 1065.31  40 
  -1   4   2 53127.8 1117.64  37 
  -1  -4   2 51338.6 877.321  38 
  -1   4   2 50176.8 976.081  22 
   1   4  -2 50655.3 830.294  37 
  -1  -4   2 51908.1 1214.35  40 
   1  -4  -2 48690.6 946.756   1 
  -1  -4   1 68500.1 935.747  24 
   1   4  -1 65747.2 838.923  21 
   1   4  -1 68244.3 579.088  36 
   1  -4  -1 67104.7 678.647  24 
  -1   4   1 64085.6 894.832   2 
   1   4  -1 67678.7 646.342   2 
   1   4  -1 67726.6 872.357  37 
  -1  -4   1 65739.1 662.644  25 
  -1   4   1 66575.8 730.061   4 
   1  -4  -1 68363.4 1085.57  40 
  -1   4   1 66499.1 1186.35  37 
  -1  -4   1 64566.4 1430.45  40 
  -1  -4   1 66906.7 711.786   4 
  -1   4   1 67704.7 1004.80  39 
  -1   4   1 68134.4 1049.48  21 
  -1  -4   0 23082.4 843.914  40 
   1  -4   0 23274.7 586.606  40 
  -1   4   0 24556.8 731.447  39 
   1   4   0 23173.9 509.025  37 
   1   4   0 22331.2 477.812  21 
  -1  -4   0 23137.5 556.073  24 
   1   4   0 21133.4 395.372   2 
  -1  -4   0 20439.2 441.077   1 
  -1   4   0 23556.7 615.876  37 
  -1   4   0 21400.6 489.741   2 
  -1   4   0 22536.8 519.685  21 
  -1   4   0 22830.0 346.404  25 
   1  -4   0 22954.5 361.608  23 
  -1  -4  -1 3982.02 219.083   3 
  -1  -4  -1 3830.02 255.582  24 
   1   4   1 4049.78 232.059  37 
  -1  -4  -1 4200.62 266.635   1 
  -1   4  -1 3639.75 128.896  25 
  -1   4  -1 3982.02 206.578  21 
   1   4   1 3660.57 225.674  23 
  -1   4  -1 3684.43 222.244  36 
  -1   4  -1 3960.81 220.073  37 
  -1  -4  -1 3894.61 345.321  40 
   1   4   1 3944.02 221.410  21 
  -1  -4  -1 4355.05 270.400  36 
  -1   4  -1 3740.25 208.742   3 
   1  -4   1 4030.00 255.205  40 
   1  -4   1 3925.55 247.185  23 
  -1   4  -2 2166.63 219.596  36 
   1   4   2 2449.62 221.925  37 
  -1   4  -2 2361.38 172.189  21 
   1   4   2 2242.01 218.611  23 
  -1  -4  -2 2628.73 286.962  36 
   1  -4   2 2481.46 215.708  40 
  -1  -4  -2 2452.15 237.334  24 
   1   4   2 2397.11 208.318  21 
  -1  -4  -2 2430.07 289.719  40 
   1  -4   2 2391.38 252.570  23 
  -1   4  -2 2591.05 172.648  37 
   1   4   2 2297.69 211.143  22 
  -1  -4  -2 2374.12 247.863   1 
  -1  -4  -3 24384.2 821.928  40 
  -1  -4  -3 24699.6 1014.23  36 
  -1  -4  -3 25092.3 835.138   1 
  -1   4  -3 25125.5 622.995  21 
   1  -4   3 25211.8 678.663  40 
   1   4   3 25052.6 720.131  37 
   1  -4   3 23174.9 838.942  23 
  -1   4  -3 24570.0 534.261  37 
   1   4   3 25130.8 754.006  22 
   1   4   3 23314.8 755.330  23 
  -1   4  -3 24507.5 776.448  36 
   1   4   4 29.8626 129.413  23 
  -1   4  -4 368.176 110.519  21 
  -1  -4  -4 91.8590 185.081  36 
   1  -4   4 170.770 86.4341  40 
   1   4   4-28.9005 120.854  22 
  -1  -4  -4 1.92489 132.890   1 
   1  -4   4 66.9172 181.760  23 
  -1   4  -4-57.9471 156.846  36 
  -1   4  -4 39.0061 58.7611  37 
  -1   4  -5 15722.8 789.295  36 
  -1  -4  -5 16584.0 801.683   1 
   1   4   5 16391.2 724.783  23 
   1  -4   5 17406.2 596.234  40 
  -1   4  -5 17397.0 685.428  21 
  -1  -4  -5 17318.8 918.571  36 
   1   4   5 16561.3 759.773  22 
   1  -4   5 15413.8 815.479  23 
  -1   4  -6 897.233 246.279  36 
   1  -4   6 1122.92 282.704  23 
  -1  -4  -6 1480.05 299.994   1 
  -1   4  -6 1267.31 228.981  21 
   1   4   6 1250.10 245.918  23 
   1   4   6 1258.51 269.307  22 
   1  -4   7 6864.39 634.894  23 
   1   4   7 7915.46 621.171  22 
   1   4   7 8137.42 573.789  23 
  -1  -4  -7 8823.33 680.561  36 
  -1  -4  -7 7380.37 612.633   1 
  -1   4  -7 6854.81 625.236  36 
  -1   4  -7 8127.51 570.160  21 
   1   4   8 571.123 218.113  22 
   1  -4   8 871.950 300.210  38 
  -1  -4  -8 953.006 288.543  36 
  -1   4  -8 478.536 221.446  36 
   1   4   8 1040.95 296.417  38 
   1   4   8 771.400 243.384  23 
  -1  -4  -8 782.437 263.810   1 
   1  -4   8 1087.83 326.259  23 
   1   4   9 5073.99 549.783  38 
  -1  -4  -9 5142.03 583.173   1 
   1   4   9 5120.72 556.410  22 
   1   4   9 3385.26 450.301  16 
  -1  -4  -9 4812.34 532.748  36 
  -1   4  -9 3470.26 479.977  17 
   1  -4   9 5044.43 581.137  23 
   1  -4   9 5041.89 583.332  35 
  -1   4  -9 4877.31 579.602  36 
   1  -4   9 4624.58 545.916  38 
   1   4   9 5097.74 503.059  23 
  -1  -4  -9 4479.24 554.261  29 
   1   4   9 4801.16 550.069  35 
  -1   4  -9 4920.66 590.993  29 
   1   4   9 5094.96 552.008  34 
   1  -4  10 5879.95 614.218  34 
   1  -4  10 5226.30 598.763  16 
  -1  -4 -10 6088.34 605.013  29 
  -1   4 -10 5879.49 630.520  17 
   1   4  10 5947.49 602.517  35 
   1  -4  10 5308.36 600.069  35 
  -1   4 -10 5552.60 609.492  29 
   1   4  10 5637.62 583.671  16 
   1   4  10 5665.74 574.470  34 
  -1   4 -11 1574.97 366.380  29 
  -1  -4 -11 1537.96 356.991  26 
   1   4  11 1065.69 303.180  16 
  -1   4 -11 1074.50 311.647  17 
   1  -4  11 1203.65 302.040  34 
   1  -4  11 1085.89 321.902  16 
  -1  -4 -11 1377.97 332.267  29 
   1   4  11 1563.83 366.336  35 
   1   4  11 1746.61 353.012  34 
   1  -4  11 1339.37 352.440  35 
  -1   4 -12 1271.54 318.772  29 
   1   4  12 992.781 250.831  34 
  -1  -4 -12 977.696 279.473  29 
   1   4  12 939.378 291.570  35 
   1  -4  12 1310.02 333.019  35 
   1  -4  12 1140.02 309.902  16 
  -1   4 -12 1260.40 292.716  17 
   1   4  12 1020.30 268.976  16 
  -1  -4 -12 1115.74 281.183  26 
  -1  -4 -13 1185.20 235.683  29 
   1  -4  13 1442.98 275.716  35 
  -1  -4 -13 1300.65 250.452  26 
   1  -4  13 1024.41 230.917  16 
  -1   4 -13 1085.43 254.821  29 
  -1   4 -13 1396.05 234.945  17 
   1   4  13 1395.84 274.970  35 
   1   4  13 1375.33 220.181  16 
  -1   4 -13 1221.09 234.322   7 
   1   4  13 1351.34 224.638  34 
  -1   5  14 1691.38 244.050  16 
  -1  -5  14 1672.39 206.656  35 
   1  -5 -14 1927.86 248.649  26 
  -1  -5  14 1591.38 270.006  16 
  -1   5  14 1855.32 249.252  35 
   1   5 -14 1137.10 195.952  29 
  -1   5  13-29.3276 202.128  16 
   1  -5 -13-66.9127 191.212  26 
  -1  -5  13-71.3009 177.740  27 
   1   5 -13 132.542 191.583  29 
  -1   5  13 93.4732 189.557  35 
   1  -5 -13-27.1986 135.455  29 
  -1  -5  13 136.511 257.975  16 
  -1  -5  13-113.915 151.295  35 
   1   5 -12 339.551 223.744  17 
  -1   5  12 239.901 254.429  16 
  -1  -5  12 303.858 287.282  16 
  -1   5  12 349.919 183.838  34 
   1  -5 -12 494.362 270.741  26 
  -1  -5  12 469.399 270.550  27 
  -1   5  12 502.665 277.274  35 
   1   5 -12 405.727 251.013  29 
   1  -5 -12 583.883 233.010  29 
  -1  -5  12 410.708 243.622  35 
  -1  -5  11 1413.03 375.388  27 
   1  -5 -11 1182.94 308.000  29 
   1   5 -11 1255.26 354.457  17 
   1   5 -11 1214.27 342.882  29 
  -1   5  11 1196.26 345.437  16 
  -1  -5  11 1074.73 335.563  35 
  -1   5  11 1379.23 339.213  35 
  -1   5  11 1301.09 304.619  34 
  -1  -5  11 968.055 334.363  16 
   1   5 -10 769.261 292.040  17 
   1   5 -10 727.772 277.479  29 
  -1  -5  10 1071.63 338.237  35 
   1  -5 -10 1240.94 318.195   1 
   1  -5 -10 1598.12 387.282  36 
  -1   5  10 1671.56 382.723  16 
  -1  -5  10 1361.06 381.687  27 
  -1   5  10 1418.91 347.311  38 
   1   5 -10 649.094 237.111  36 
  -1   5  10 822.505 272.457  22 
   1  -5 -10 987.806 281.537  29 
  -1  -5  10 750.548 280.251  38 
  -1   5  10 1255.11 328.749  35 
  -1   5  10 1201.50 293.863  34 
  -1  -5  10 530.781 278.012  23 
   1   5  -9 9246.00 738.797  36 
  -1  -5   9 9335.18 843.533  23 
  -1  -5   9 10123.6 872.646  38 
  -1   5   9 9784.25 757.232  22 
   1  -5  -9 9790.30 743.893   1 
   1  -5  -9 9533.43 762.531  36 
  -1   5   9 10853.9 799.413  38 
   1   5  -9 10774.8 776.824  21 
   1   5  -8 13025.0 830.405  36 
  -1  -5   8 14230.0 1004.93  38 
   1  -5  -8 11950.0 837.911  36 
   1  -5  -8 13744.0 857.402   1 
  -1  -5   8 12159.7 975.365  23 
  -1   5   8 14280.6 899.761  38 
   1   5  -8 15194.5 885.836  21 
  -1   5   8 13458.9 844.328  22 
   1   5  -7 18920.3 858.368  37 
  -1   5   7 19419.8 1005.59  38 
   1  -5  -7 17346.9 937.647  36 
  -1  -5   7 16679.5 1092.75  38 
  -1   5   7 16970.7 917.065  22 
   1   5  -7 16784.7 887.228  36 
  -1  -5   7 16333.4 1050.32  23 
   1   5  -7 17867.4 894.797  21 
   1  -5  -7 16951.0 887.520   1 
   1   5  -6 3836.27 381.962  37 
   1   5  -6 4298.20 418.561  21 
   1   5  -6 3821.83 431.216  36 
  -1   5   6 4146.98 443.876  22 
   1  -5  -6 3908.53 427.995   1 
  -1  -5   6 4042.32 546.357  23 
  -1   5   6 4615.48 426.038  23 
  -1  -5   6 3640.30 509.720  38 
   1  -5  -6 4333.05 461.121  36 
  -1   5   6 4846.08 513.960  38 
   1   5  -5 312.729 149.190  21 
   1   5  -5 89.6661 104.399  37 
   1  -5  -5 254.435 109.266  40 
   1  -5  -5 266.881 194.613  36 
   1   5  -5 288.330 188.696  36 
  -1  -5   5 303.126 245.511  23 
  -1   5   5 172.404 167.466  22 
  -1  -5   5 231.243 207.521  38 
  -1   5   5 150.422 145.189  23 
   1  -5  -5 255.829 184.572   1 
  -1   5   5 323.879 198.488  38 
  -1   5   4 4515.53 449.131  38 
  -1  -5   4 3738.88 430.172  38 
  -1   5   4 4593.35 396.512  23 
  -1  -5   4 3915.70 418.118  23 
   1  -5  -4 4495.55 418.865  36 
   1   5  -4 3957.91 372.260  36 
   1  -5  -4 4712.29 345.278  40 
  -1  -5   4 3942.14 218.679  40 
  -1   5   4 4324.75 231.296  39 
  -1   5   4 4651.86 399.338  22 
   1   5  -4 4075.61 324.777  37 
   1  -5  -4 4518.60 397.037   1 
   1   5  -4 4385.76 346.761  21 
  -1   5   4 4504.79 206.306   5 
   1  -5  -3 5770.58 410.344  40 
  -1   5   3 5940.58 278.102  39 
  -1   5   3 6115.00 416.021  22 
  -1   5   3 6055.19 455.718  38 
  -1   5   3 5918.80 440.410  37 
  -1  -5   3 5897.89 412.267  38 
   1   5  -3 6109.63 355.231  36 
   1  -5  -3 5572.59 416.539  36 
   1   5  -3 6146.79 343.870  37 
  -1  -5   3 5573.98 411.275  23 
  -1  -5   3 6303.89 443.597  40 
   1   5  -3 6758.01 376.268  21 
   1  -5  -3 5842.36 419.408   1 
  -1   5   3 7114.68 498.884  23 
  -1  -5   2 179392. 3058.21  40 
  -1  -5   2 176335. 1553.75  38 
   1   5  -2 187892. 1445.95  36 
   1   5  -2 178332. 1649.98  37 
   1   5  -2 179548. 1665.31  21 
  -1   5   2 174901. 1923.25  22 
  -1  -5   2 181841. 1805.07  24 
   1  -5  -2 177192. 1406.67  24 
   1  -5  -2 175369. 2104.74  40 
   1  -5  -2 182307. 1884.31   1 
  -1   5   2 179003. 2148.44  37 
  -1   5   2 182486. 1715.70  38 
  -1   5   2 177230. 1586.71  39 
  -1  -5   2 171564. 1254.84  25 
  -1   5   2 185899. 1298.93  23 
   1  -5  -1 49969.1 684.842  24 
  -1   5   1 48016.3 818.133   2 
  -1   5   1 49861.0 616.385   4 
  -1  -5   1 48549.3 589.983   4 
  -1   5   1 49357.4 953.381  21 
   1   5  -1 47969.3 628.978   2 
   1   5  -1 49477.3 812.722  37 
  -1  -5   1 49054.5 592.715  25 
  -1  -5   1 49132.3 1593.19  40 
  -1   5   1 51216.1 969.579  39 
   1   5  -1 50244.1 511.835  36 
   1  -5  -1 49731.2 1050.46  40 
   1   5  -1 49340.5 795.199  21 
  -1   5   1 48409.8 1084.95  37 
  -1  -5   1 49680.4 871.078  24 
  -1  -5   0 90994.0 1178.92  24 
   1   5   0 86905.8 903.183   2 
   1   5   0 89852.7 1060.01  21 
  -1   5   0 89282.6 1061.26   2 
   1   5   0 88185.4 1096.85  37 
   1  -5   0 95274.5 735.667  23 
  -1  -5   0 84546.9 1815.66  40 
  -1   5   0 86501.8 1127.10  21 
   1  -5   0 87782.9 1297.60  40 
   1  -5   0 90613.3 976.688  24 
  -1   5   0 87010.7 1281.14  37 
  -1   5  -1 579.859 111.460  36 
   1  -5   1 615.592 139.580  40 
  -1  -5  -1 841.420 142.790  36 
   1   5   1 678.115 124.357  37 
  -1   5  -1 750.746 115.089  21 
  -1  -5  -1 620.028 119.555   1 
  -1  -5  -1 671.347 127.933  24 
   1   5   1 614.801 113.534  21 
  -1   5  -1 576.955 113.013  37 
  -1   5  -1 622.279 92.4821   3 
  -1  -5  -1 648.380 95.7748   3 
  -1   5  -1 482.898 41.4147  25 
  -1  -5  -1 737.388 204.691  40 
   1   5   2 17010.5 568.249  23 
  -1   5  -2 16927.8 571.390  36 
  -1   5  -2 18139.6 511.701  21 
  -1  -5  -2 19738.2 785.635  36 
   1  -5   2 16909.2 591.401  40 
   1   5   2 17567.5 585.019  22 
  -1   5  -2 17452.1 495.745  37 
  -1  -5  -2 16761.6 733.192  40 
  -1  -5  -2 17459.6 622.887  24 
   1   5   2 17697.1 581.369  21 
  -1  -5  -2 18636.3 668.578   1 
   1  -5   2 17383.2 617.209  23 
   1   5   2 17804.4 597.429  37 
  -1   5  -3 4966.33 271.145  37 
   1   5   3 4500.93 338.776  22 
  -1   5  -3 4398.60 284.089  21 
   1  -5   3 4194.12 310.618  40 
   1  -5   3 4790.17 393.049  23 
   1   5   3 4253.57 324.335  23 
  -1  -5  -3 4109.61 367.879  40 
   1   5   3 4883.73 344.167  37 
  -1  -5  -3 4156.03 421.127  36 
  -1   5  -3 3892.66 330.000  36 
  -1  -5  -3 4083.14 366.554   1 
   1   5   4 632.654 163.293  37 
  -1   5  -4 596.985 182.954  36 
   1   5   4 696.506 183.695  22 
   1  -5   4 742.481 148.130  40 
   1  -5   4 681.916 238.507  23 
  -1  -5  -4 728.243 233.804  36 
  -1   5  -4 833.101 154.441  21 
   1   5   4 720.654 175.640  23 
  -1   5  -4 593.693 108.633  37 
  -1  -5  -4 926.834 220.613   1 
  -1  -5  -4 597.447 157.119  40 
  -1   5  -5 16560.2 835.829  36 
   1  -5   5 17628.8 867.982  23 
  -1  -5  -5 18529.0 857.735   1 
   1   5   5 18628.5 751.136  23 
  -1  -5  -5 18403.8 927.922  36 
   1   5   5 18518.0 810.787  22 
  -1   5  -5 19143.1 735.086  21 
   1  -5   5 18504.6 651.900  40 
  -1   5  -6 5518.43 522.446  36 
   1  -5   6 5570.93 543.860  23 
  -1   5  -6 6102.13 457.172  21 
   1   5   6 6621.80 486.277  23 
   1   5   6 6187.10 518.412  22 
  -1  -5  -6 6222.08 545.012   1 
  -1   5  -7-5.70364 143.477  21 
   1   5   7 347.407 186.600  23 
   1  -5   7 307.763 252.941  23 
   1   5   7 39.5493 172.716  22 
  -1  -5  -7 172.298 221.759   1 
  -1   5  -7-667.249 258.235  36 
  -1  -5  -7 921.358 289.543  36 
  -1  -5  -8 11589.6 804.128   1 
  -1   5  -8 12162.4 854.840  36 
   1   5   8 12724.1 733.212  23 
   1   5   8 12870.8 811.774  38 
   1  -5   8 10412.6 818.257  23 
  -1  -5  -8 12495.0 805.219  36 
   1   5   8 11925.8 789.868  22 
   1  -5   8 12456.3 842.423  38 
   1  -5   9 5.99425 210.354  35 
  -1  -5  -9-192.463 255.113  36 
   1  -5   9 79.1717 151.882  38 
  -1  -5  -9 11.7408 193.172  29 
   1   5   9 128.651 168.917  23 
   1   5   9-25.7813 211.072  34 
  -1  -5  -9-90.5063 195.102   1 
   1  -5   9 41.0231 214.754  23 
   1   5   9 379.277 241.591  22 
   1   5   9 56.2461 179.870  38 
   1   5   9 169.879 201.711  35 
  -1   5  -9-25.2314 207.242  29 
  -1   5  -9-66.2627 175.690  36 
   1   5   9 130.342 198.416  16 
  -1   5  -9-40.2066 204.341  17 
  -1  -5 -10 6915.24 646.468  29 
  -1   5 -10 6925.29 665.839  29 
  -1   5 -10 6623.51 671.504  17 
   1  -5  10 6044.46 634.380  16 
   1  -5  10 6272.23 678.370  35 
   1   5  10 6521.03 625.713  35 
   1   5  10 6731.65 618.877  16 
  -1  -5 -10 7408.66 651.528  26 
   1   5  10 7079.68 619.105  34 
   1  -5  11 16662.8 961.675  16 
  -1   5 -11 18075.3 991.731  29 
  -1   5 -11 17426.1 985.509  17 
  -1  -5 -11 17897.4 940.585  29 
   1   5  11 17089.5 943.204  35 
   1   5  11 18588.5 930.822  34 
   1  -5  11 17069.8 1012.78  35 
  -1  -5 -11 18288.3 950.249  26 
   1   5  11 18456.6 922.137  16 
   1  -5  12-27.1364 226.991  16 
  -1  -5 -12 133.286 207.422  29 
  -1   5 -12 213.740 208.414  17 
   1   5  12 95.2637 186.135  34 
   1   5  12 73.1538 204.135  16 
  -1   5 -12 185.712 248.331  29 
   1   5  12 127.123 236.283  35 
  -1  -5 -12 175.401 205.778  26 
   1  -5  12 29.6317 227.526  35 
   1  -5  13 2641.71 319.356  16 
   1   5  13 2274.12 283.252  16 
  -1   5 -13 2414.29 321.317  29 
   1   5  13 2648.64 331.539  35 
   1   5  13 2572.44 286.855  34 
  -1  -5 -13 2474.60 291.245  29 
  -1  -5 -13 2514.85 313.596  26 
   1  -5  13 2298.28 317.063  35 
  -1   5 -13 2367.48 287.624  17 
  -1   6  14 1216.62 211.367  35 
  -1  -6  14 1167.72 234.473  16 
   1  -6 -14 1016.73 194.849  26 
  -1  -6  14 751.034 126.539  35 
  -1   6  14 1309.95 213.893  16 
   1   6 -14 852.526 183.556  29 
  -1   6  13 1143.27 281.210  16 
  -1  -6  13 1093.91 320.901  16 
  -1   6  13 1095.40 276.968  35 
  -1   6  13 1323.76 226.977  34 
  -1  -6  13 946.542 249.140  27 
   1  -6 -13 1270.98 275.054  26 
  -1  -6  13 1156.39 236.251  35 
   1   6 -13 966.124 265.516  29 
  -1  -6  12 706.641 281.469  27 
  -1   6  12 669.448 299.509  16 
  -1  -6  12 1098.97 294.504  35 
  -1  -6  12 477.229 293.705  16 
   1   6 -12 1091.72 285.474  17 
   1  -6 -12 800.273 241.055  29 
   1  -6 -12 1083.09 328.204  26 
  -1   6  12 713.345 273.737  35 
  -1   6  12 1129.95 265.972  34 
   1   6 -12 788.052 287.615  29 
   1  -6 -11 537.215 276.249  26 
  -1  -6  11-404.035 367.272  16 
  -1   6  11 1.38877 205.151  34 
  -1  -6  11 45.5245 252.616  27 
  -1   6  11 203.795 275.698  16 
  -1   6  11-27.4668 215.862  35 
   1  -6 -11 61.2166 188.022  29 
   1   6 -11-34.0067 212.797  17 
   1   6 -11 80.8302 240.899  29 
  -1  -6  11 111.880 229.526  35 
  -1   6  10 230.836 198.783  34 
   1  -6 -10 60.4208 179.125  29 
  -1   6  10-87.7795 264.060  16 
  -1   6  10 108.259 210.210  35 
   1   6 -10-157.148 228.507  17 
  -1  -6  10-123.646 275.847  35 
  -1  -6  10-109.066 243.793  27 
   1   6 -10 106.553 214.191  29 
   1   6  -9 17173.1 999.027  29 
   1  -6  -9 16067.8 964.843  36 
  -1  -6   9 15441.4 956.625   6 
  -1   6   9 16394.9 982.799  16 
  -1   6   9 16805.8 971.867  22 
   1  -6  -9 16481.1 960.531   1 
  -1   6   9 16843.3 985.681  35 
  -1   6   9 16437.4 983.224  38 
   1   6  -9 16352.8 963.117  36 
  -1  -6   9 16876.8 1106.73  38 
   1   6  -9 17571.7 988.983  21 
  -1  -6   9 13925.5 1063.59  23 
  -1  -6   9 16098.8 1014.79  27 
  -1  -6   8 10510.3 887.854  38 
   1  -6  -8 10837.1 772.895   1 
   1  -6  -8 10378.8 773.904  36 
  -1  -6   8 10530.9 899.344  23 
   1   6  -8 11825.8 784.039  21 
  -1   6   8 10545.4 763.422  22 
   1   6  -8 10180.3 742.524  36 
  -1   6   8 12176.2 831.962  38 
   1   6  -7 77973.5 1855.38  21 
   1  -6  -7 75394.7 1887.65   1 
  -1   6   7 75287.2 1871.47  22 
   1  -6  -7 75508.4 1938.81  36 
  -1   6   7 83992.5 2053.46  38 
  -1  -6   7 69439.8 2163.31  23 
   1   6  -7 81793.0 1763.99  37 
  -1  -6   7 74569.9 2230.90  38 
   1   6  -7 76925.9 1857.75  36 
  -1  -6   6 350.185 214.654  38 
   1  -6  -6 338.241 209.712  36 
   1  -6  -6 206.814 118.989  40 
   1   6  -6 144.939 143.554  37 
  -1   6   6 391.595 219.639  38 
   1   6  -6 265.636 173.463  36 
  -1   6   6 397.416 166.594  23 
  -1   6   6 399.016 217.710  22 
  -1  -6   6 45.0943 235.649  23 
   1   6  -6 482.650 200.358  21 
   1  -6  -6 332.834 203.167   1 
  -1  -6   5 193.924 175.203  38 
   1   6  -5 704.059 196.826  21 
  -1   6   5 343.416 189.042  38 
   1  -6  -5 441.675 146.341  40 
   1   6  -5 408.069 174.330  36 
  -1   6   5 234.233 141.790  23 
   1   6  -5 289.872 142.985  37 
  -1   6   5 328.671 175.394  22 
   1  -6  -5 661.375 221.591   1 
  -1  -6   5 386.139 241.597  23 
  -1  -6   4 11454.5 489.927  40 
  -1   6   4 11665.2 667.297  38 
  -1   6   4 11506.7 608.500  22 
   1   6  -4 11293.3 555.363  21 
  -1   6   4 11255.1 365.268  39 
  -1   6   4 13581.5 613.222  23 
   1  -6  -4 10664.4 622.534  36 
  -1  -6   4 10523.0 651.041  23 
   1  -6  -4 10386.4 547.848  40 
  -1  -6   4 10199.9 649.256  38 
   1   6  -4 10617.5 516.708  37 
   1  -6  -4 11140.4 629.101   1 
   1   6  -4 11020.8 544.496  36 
   1  -6  -3 14054.4 640.896   1 
  -1   6   3 13103.7 618.154  22 
   1   6  -3 12290.3 524.390  21 
   1  -6  -3 12707.9 469.487  24 
   1   6  -3 16684.5 585.059  37 
  -1   6   3 13380.4 661.005  37 
   1  -6  -3 12255.6 609.741  36 
  -1  -6   3 12736.5 553.523  38 
  -1  -6   3 12823.5 606.643  23 
  -1   6   3 13353.1 430.149  39 
  -1  -6   3 15371.1 844.255  40 
   1   6  -3 12769.7 482.966  36 
   1  -6  -3 12078.8 632.812  40 
  -1   6   3 13033.9 618.205  38 
  -1  -6   2 5717.98 730.238  40 
  -1   6   2 5849.15 295.057  38 
   1  -6  -2 5510.99 276.965  24 
  -1  -6   2 5527.90 271.494  38 
   1   6  -2 5721.50 320.631  21 
   1  -6  -2 5407.30 412.131  40 
  -1   6   2 5786.54 376.445  22 
   1  -6  -2 6084.18 374.491   1 
  -1  -6   2 5848.29 230.386  25 
   1   6  -2 5656.45 319.347  37 
  -1  -6   2 6229.21 361.084  24 
  -1   6   2 5346.21 403.742  37 
  -1   6   2 5702.73 313.657  39 
   1   6  -2 5571.92 251.751  36 
  -1   6   1 21963.3 596.259   2 
  -1   6   1 21490.9 754.151  37 
   1  -6  -1 19442.2 717.605  40 
  -1   6   1 22426.7 395.693   4 
   1   6  -1 22049.2 367.718  36 
  -1  -6   1 21712.0 405.112  25 
   1  -6  -1 22209.6 513.750  24 
  -1  -6   1 22153.7 385.009   4 
   1   6  -1 22144.2 479.217   2 
  -1  -6   1 18821.0 1042.87  40 
  -1   6   1 22594.4 702.494  21 
  -1  -6   1 21883.1 625.794  24 
   1   6  -1 22058.9 586.645  21 
   1   6  -1 23831.5 623.523  37 
  -1   6   1 22076.9 690.085  39 
   1   6   0 4797.29 277.614  21 
  -1  -6   0 4771.37 307.965  24 
   1   6   0 4656.35 234.899   2 
   1   6   0 4350.64 275.087  37 
   1  -6   0 4489.50 245.810  24 
  -1   6   0 3939.51 308.010  37 
  -1   6   0 4420.16 285.374  21 
   1  -6   0 4400.80 341.902  40 
  -1   6   0 4833.85 275.255   2 
  -1  -6   0 4108.73 444.468  40 
   1   6   1 86.3200 75.8447  21 
  -1   6  -1 81.3667 49.9748   3 
   1  -6   1 144.939 87.1727  23 
   1  -6   1 120.721 118.627  40 
  -1   6  -1 147.246 87.1986  37 
  -1  -6  -1 38.4029 44.4014   3 
   1   6   1 142.747 100.489  37 
  -1   6  -1 153.338 81.7227  21 
  -1  -6  -1-80.7008 199.437  40 
  -1  -6  -1 148.157 104.674  24 
  -1  -6  -1 422.654 103.148  36 
  -1   6  -1 17.7540 72.2886   2 
   1   6   2 2336.10 110.689  39 
  -1   6  -2 2634.47 224.192  37 
  -1   6  -2 2534.01 252.878  36 
   1   6   2 2589.83 261.840  37 
  -1   6  -2 1709.16 93.6624  25 
  -1  -6  -2 2779.24 274.306  24 
   1  -6   2 2484.61 264.420  40 
   1   6   2 2888.27 234.672  23 
   1   6   2 2680.25 253.235  21 
  -1  -6  -2 2838.52 346.097  40 
  -1  -6  -2 3163.85 302.295  36 
  -1  -6  -2 2579.26 274.010   1 
  -1   6  -2 2622.31 225.775  21 
   1  -6   2 2668.95 260.844  23 
   1   6   3 33819.2 931.582  37 
  -1   6  -3 31671.3 752.246  37 
  -1  -6  -3 32567.6 1095.43  36 
  -1  -6  -3 29813.1 927.446  24 
  -1   6  -3 34729.2 826.406  21 
   1  -6   3 30901.4 894.780  40 
   1   6   3 31558.1 898.140  22 
  -1  -6  -3 30741.6 1049.42  40 
   1  -6   3 31553.7 960.248  23 
  -1   6  -3 36639.4 952.945  36 
  -1  -6  -3 31055.9 976.931   1 
   1   6   3 33644.3 889.317  23 
  -1  -6  -4 14197.2 784.987  36 
  -1  -6  -4 13769.5 693.659  40 
   1   6   4 15428.5 649.005  23 
   1   6   4 14780.0 651.489  37 
   1  -6   4 15135.5 625.848  40 
  -1  -6  -4 15003.8 737.259   1 
   1   6   4 14131.5 671.361  22 
   1  -6   4 14547.6 739.724  23 
  -1   6  -4 15127.0 541.841  37 
  -1   6  -4 14500.1 695.543  36 
  -1   6  -4 14363.0 602.239  21 
   1   6   5 75661.6 1493.74  23 
  -1   6  -5 71306.1 1670.82  36 
  -1  -6  -5 73892.7 1817.02  36 
   1   6   5 75054.9 1622.56  22 
  -1  -6  -5 73386.3 1710.58   1 
  -1   6  -5 77060.7 1492.31  21 
   1  -6   5 70277.6 1749.31  23 
  -1   6  -6 1064.50 270.885  36 
   1   6   6 1517.63 254.738  23 
   1   6   6 1432.14 288.668  22 
  -1  -6  -6 1672.73 362.677  36 
   1  -6   6 912.065 279.132  23 
  -1  -6  -6 1255.24 281.434   1 
  -1   6  -6 1262.93 237.853  21 
  -1  -6  -7 1287.37 303.458   1 
   1   6   7 1181.40 249.073  23 
  -1   6  -7 1192.12 296.873  36 
   1  -6   7 1015.52 304.105  23 
   1   6   7 1158.03 280.893  22 
   1   6   7 1252.84 289.174  38 
   1  -6   7 1342.00 341.606  38 
  -1  -6  -7 2073.22 402.924  36 
   1  -6   8 5365.14 573.983  38 
  -1   6  -8 4220.73 528.433  36 
  -1  -6  -8 4945.15 521.220  36 
   1   6   8 5409.58 482.859  23 
   1  -6   8 4493.09 560.708  23 
   1   6   8 4460.14 482.817  38 
   1   6   8 4969.75 539.290  22 
  -1  -6  -8 4928.41 547.105   1 
  -1  -6  -9 12167.7 842.709  26 
   1  -6   9 11896.0 843.968  38 
  -1  -6  -9 12646.8 886.606   1 
   1  -6   9 11656.9 838.439  27 
  -1   6  -9 11638.5 884.283  29 
  -1  -6  -9 11671.7 781.012  36 
   1   6   9 11256.8 794.627  22 
  -1   6  -9 12443.8 907.565  17 
   1   6   9 12478.4 811.583  38 
   1   6   9 12465.6 828.051  35 
   1  -6   9 11633.1 884.723  23 
   1   6   9 12912.7 843.498  34 
   1  -6   9 11898.1 885.631  35 
  -1   6  -9 11673.6 882.829  36 
   1   6   9 10513.9 781.964  16 
  -1  -6  -9 11878.7 813.175  29 
  -1  -6 -10 3544.10 466.457  29 
   1   6  10 3673.86 490.956  35 
  -1   6 -10 3413.50 501.793  17 
   1  -6  10 3450.39 519.598  35 
   1   6  10 3823.99 470.010  34 
   1  -6  10 3749.64 503.406  27 
  -1   6 -10 3003.43 484.650  29 
   1   6  10 3543.19 463.856  16 
  -1  -6 -10 3871.17 494.683  26 
   1   6  11 15397.4 855.314  34 
  -1   6 -11 13818.5 900.041  29 
   1   6  11 15485.0 843.215  16 
  -1   6 -11 15783.7 949.780  17 
   1   6  11 14582.1 851.994  35 
   1  -6  11 14929.8 936.972  35 
  -1  -6 -11 14970.9 844.179  29 
  -1  -6 -11 15371.0 865.615  26 
   1  -6  11 14270.5 908.912  16 
  -1   6 -12 8497.03 627.414  17 
   1   6  12 8935.73 620.883  35 
   1   6  12 9111.01 606.131  34 
  -1  -6 -12 8672.55 616.039  26 
   1  -6  12 8342.89 623.260  16 
   1   6  12 8902.91 584.886  16 
   1  -6  12 8467.08 648.421  35 
  -1   6 -12 9012.68 666.389  29 
  -1  -6 -12 9352.53 605.488  29 
  -1   6 -13 821.611 212.139  17 
  -1   6 -13 810.562 221.271  29 
   1   6  13 970.348 248.451  35 
   1   6  13 1368.80 225.115  34 
   1  -6  13 1005.40 222.629  16 
  -1  -6 -13 879.105 200.679  29 
   1   6  13 1068.31 210.910  16 
  -1  -6 -13 1071.21 219.859  26 
   1  -6  13 1028.84 226.129  35 
  -1  -7  13 274.057 193.510  27 
   1  -7 -13 482.469 214.935  26 
  -1   7  13 465.043 155.481  34 
  -1   7  13 611.306 237.145  16 
  -1  -7  13 728.079 287.044  16 
   1   7 -13 753.841 205.552  17 
  -1  -7  13 580.290 183.105  35 
  -1   7  13 555.804 229.689  35 
   1   7 -13 509.458 230.402  29 
  -1  -7  12 273.292 189.876  35 
  -1  -7  12-202.129 335.001  16 
  -1   7  12 218.173 241.611  35 
  -1  -7  12 108.330 238.530  27 
   1   7 -12 153.170 207.952  17 
   1   7 -12 81.9158 231.632  29 
  -1   7  12 188.815 258.640  16 
   1  -7 -12 120.161 169.367  29 
   1  -7 -12 159.270 228.688  26 
  -1   7  12-67.9004 171.691  34 
   1   7 -11 1132.91 328.642  17 
  -1  -7  11 891.032 332.281  27 
   1  -7 -11 1005.95 268.890  29 
   1   7 -11 1038.27 327.001  29 
  -1  -7  11 1124.75 306.027  35 
  -1   7  11 1155.44 299.425  34 
  -1   7  11 1132.79 336.903  35 
  -1   7  11 1228.02 349.955  16 
   1  -7 -11 1042.15 325.399  26 
   1   7 -10 1963.80 414.183  17 
  -1   7  10 1715.82 352.925  34 
   1  -7 -10 2647.66 384.190  29 
  -1   7  10 2278.78 420.888  16 
   1  -7 -10 2631.44 444.430  26 
   1   7 -10 2052.60 427.528  29 
  -1  -7  10 2141.73 443.461  27 
  -1   7  10 2659.57 437.999  35 
  -1  -7  10 2398.21 430.526  35 
   1  -7  -9 462.084 322.486  36 
   1  -7  -9 283.724 217.476   1 
  -1   7   9 161.333 223.215  35 
  -1   7   9 639.298 250.012  22 
  -1  -7   9 407.746 259.013   6 
  -1  -7   9 52.4953 215.915  38 
   1   7  -9 150.692 172.027  21 
  -1   7   9 256.648 211.377  38 
  -1   7   9 478.088 228.048  16 
  -1   7   9 351.989 248.178  34 
   1   7  -9 290.506 221.018  29 
  -1  -7   9 254.175 189.314  27 
   1   7  -9-57.6567 225.408  36 
  -1  -7   8 124598. 2955.27  38 
  -1   7   8 120858. 2500.85  22 
  -1   7   8 137554. 2681.09  38 
   1  -7  -8 126965. 2595.46   1 
   1  -7  -8 115568. 2506.51  36 
   1   7  -8 122255. 2528.18  36 
  -1  -7   8 115554. 2918.45  23 
   1   7  -8 130960. 2606.70  21 
   1   7  -7 2555.82 343.522  37 
   1   7  -7 2424.74 375.541  21 
   1  -7  -7 2388.89 396.754   1 
  -1  -7   7 2173.85 428.652  23 
  -1   7   7 2297.90 386.707  22 
   1   7  -7 2405.60 370.888  36 
  -1  -7   7 2204.46 402.486  38 
  -1   7   7 2486.61 384.660  38 
   1  -7  -7 2577.59 400.670  36 
  -1   7   6 56753.8 1597.22  38 
  -1   7   6 49140.3 1446.17  22 
  -1  -7   6 46404.8 1666.45  23 
   1   7  -6 49131.4 1386.20  21 
   1  -7  -6 49095.6 1470.35   1 
   1  -7  -6 54523.5 1290.00  40 
   1  -7  -6 52609.8 1515.71  36 
  -1  -7   6 48611.0 1681.62  38 
   1   7  -6 49563.3 1401.74  36 
   1   7  -6 52843.6 1362.74  37 
   1   7  -5 14749.9 705.877  21 
   1  -7  -5 15122.8 686.467  40 
   1  -7  -5 14857.1 780.301  36 
  -1  -7   5 14093.3 836.614  38 
  -1   7   5 15960.3 806.019  38 
  -1  -7   5 14316.6 847.261  23 
   1  -7  -5 14222.1 764.946   1 
  -1   7   5 14596.0 754.972  22 
   1   7  -5 14643.2 679.194  37 
   1   7  -5 14042.6 677.239  36 
  -1   7   4 88574.7 1723.64  38 
   1   7  -4 81565.1 1451.44  36 
  -1   7   4 83960.4 1747.83  37 
   1  -7  -4 85645.5 1741.24   1 
   1   7  -4 83321.0 1505.47  21 
  -1   7   4 87149.3 1022.85  39 
  -1  -7   4 81059.8 1663.72  38 
  -1  -7   4 79164.2 1726.06  23 
   1   7  -4 82241.1 1469.11  37 
  -1   7   4 83580.0 1647.89  22 
   1  -7  -4 77458.4 1560.25  40 
   1  -7  -4 82436.1 1699.62  36 
  -1  -7   4 88585.8 1611.76  40 
   1   7  -3 2665.77 234.637  36 
   1  -7  -3 3114.03 329.344   1 
   1  -7  -3 2359.60 305.839  40 
  -1   7   3 2977.59 286.546  38 
   1  -7  -3 2797.71 314.411  36 
  -1   7   3 2852.61 342.673  37 
   1  -7  -3 2860.63 245.437  24 
  -1   7   3 2958.04 218.131  39 
  -1   7   3 3056.49 333.143  22 
  -1   7   3 3342.45 243.752  23 
   1   7  -3 3066.71 281.639  21 
  -1  -7   3 2998.22 318.005  24 
  -1  -7   3 2906.47 419.396  40 
  -1  -7   3 2892.22 253.825  38 
   1   7  -3 2850.69 272.708  37 
   1   7  -2 57558.0 901.347   2 
  -1   7   2 61187.8 889.881   4 
  -1  -7   2 57222.5 691.485  25 
  -1  -7   2 57595.9 809.376  38 
   1  -7  -2 55584.2 1345.41  40 
  -1  -7   2 56843.0 1153.56  24 
   1  -7  -2 58225.7 1180.55   1 
   1   7  -2 58521.2 1073.55  37 
   1   7  -2 58525.6 822.533  36 
  -1   7   2 60522.9 1361.16  37 
  -1   7   2 58569.1 1293.61  21 
  -1   7   2 60002.7 1065.37  39 
  -1   7   2 59115.5 887.590  38 
   1  -7  -2 59394.3 953.629  24 
  -1  -7   2 58686.8 2247.15  40 
   1   7  -2 57029.9 1072.41  21 
  -1  -7   1 16749.3 360.733  25 
   1   7  -1 16030.7 559.118  37 
  -1   7   1 16422.3 558.464   2 
   1   7  -1 16863.5 549.845  21 
  -1  -7   1 13808.5 933.432  40 
   1  -7  -1 15048.3 688.875  40 
  -1   7   1 16118.4 646.052  21 
  -1   7   1 16654.8 639.338  39 
  -1   7   1 15249.7 687.679  37 
  -1  -7   1 16479.6 584.063  24 
   1  -7  -1 17765.2 508.985  24 
   1   7  -1 16813.4 464.102   2 
   1   7   0 42764.7 907.042  37 
  -1  -7   0 41926.4 718.664  25 
  -1   7   0 39528.0 1001.56  37 
  -1   7   0 39312.0 822.632   2 
   1  -7   0 40202.4 1102.68  40 
   1   7   0 40804.5 857.170  21 
  -1   7   0 39170.9 908.560  21 
   1   7   0 39503.7 741.589   2 
   1  -7   0 40462.2 787.707  24 
  -1  -7   0 42919.5 937.497  24 
  -1  -7   0 39019.4 1380.25  40 
  -1  -7  -1 166.473 102.133  24 
  -1   7  -1 275.077 107.344  21 
   1   7   1 388.808 131.418  37 
  -1  -7  -1 396.916 96.9118  36 
   1  -7   1 372.934 178.739  40 
  -1   7  -1 407.738 129.751  37 
  -1   7  -1 198.110 105.690   2 
   1   7   1 341.494 120.078  21 
  -1  -7  -1 336.425 187.131  40 
   1  -7   1 227.109 95.0934  23 
  -1   7  -1 151.185 55.5641   3 
  -1  -7  -1 231.456 106.421   1 
  -1  -7  -1 233.300 57.5875   3 
   1   7   2 2332.25 260.826  37 
  -1  -7  -2 2763.75 270.265  36 
   1  -7   2 2535.21 253.397  23 
   1   7   2 2431.05 255.952  21 
  -1  -7  -2 2570.58 219.555   3 
  -1  -7  -2 2732.62 297.256   1 
   1   7   2 2470.65 146.743  39 
  -1  -7  -2 2791.14 366.794  40 
  -1   7  -2 2342.09 228.728  21 
  -1   7  -2 2370.40 238.441  37 
   1  -7   2 2432.59 286.074  40 
   1   7   2 2284.44 228.503  23 
  -1  -7  -2 2355.23 265.636  24 
  -1   7  -2 2550.43 244.744  36 
  -1   7  -3 45.9659 37.6775  25 
   1   7   3 109.873 116.081  23 
   1  -7   3-17.0198 118.027  40 
  -1  -7  -3-6.98872 129.186   1 
   1   7   3 47.9658 131.756  22 
  -1   7  -3 31.5683 69.4484  37 
  -1  -7  -3 266.950 158.249  40 
  -1   7  -3 69.7214 93.2504  21 
  -1   7  -3 40.9973 123.333  36 
  -1  -7  -3 99.7889 123.851  36 
   1  -7   3-44.7322 172.863  23 
  -1  -7  -3 73.1101 125.508  24 
   1   7   3 0.55683 113.585  37 
  -1   7  -4 610274. 3990.86  21 
   1   7   4 588705. 4249.00  37 
  -1  -7  -4 580011. 4806.50  36 
  -1   7  -4 593942. 3685.84  37 
  -1   7  -4 590548. 4370.22  36 
   1   7   4 610952. 4032.63  23 
   1  -7   4 583911. 4704.96  23 
  -1  -7  -4 612561. 4746.33  40 
   1   7   4 599587. 4332.65  22 
   1  -7   4 593097. 4236.81  40 
  -1  -7  -4 600741. 4744.57   1 
  -1   7  -5 21019.2 812.773  21 
   1   7   5 20110.2 775.866  23 
   1   7   5 20644.0 876.430  22 
  -1   7  -5 19303.2 892.764  36 
   1  -7   5 19139.9 935.534  23 
  -1  -7  -5 19254.6 933.906  36 
  -1  -7  -5 20267.6 933.061   1 
   1  -7   6 32560.7 1304.95  23 
  -1   7  -6 35765.6 1143.82  21 
   1   7   6 34431.6 1202.88  22 
  -1  -7  -6 35411.7 1277.79  36 
  -1  -7  -6 34722.5 1268.42   1 
  -1   7  -6 32597.7 1264.45  36 
   1   7   6 36181.1 1079.76  23 
   1   7   7 1205.71 286.194  22 
  -1  -7  -7 1143.71 282.032   1 
  -1   7  -7 1177.40 300.713  36 
   1  -7   7 1027.06 320.443  23 
   1  -7   7 1634.52 330.173  38 
  -1  -7  -7 2197.82 382.835  36 
   1   7   7 1523.60 260.306  23 
   1   7   7 1506.83 298.701  38 
   1   7   8-46.0737 180.545  22 
  -1  -7  -8 305.699 175.749  36 
   1  -7   8 12.9903 173.110  38 
  -1  -7  -8-59.8287 197.950   1 
  -1   7  -8 546.061 249.087  36 
   1  -7   8 35.9445 217.847  23 
   1   7   8 126.367 185.500  38 
   1   7   9 749.082 250.684  22 
  -1   7  -9 697.150 288.738  29 
  -1  -7  -9 882.637 273.738   1 
  -1   7  -9 605.548 305.363  17 
   1  -7   9 571.610 278.432  23 
   1   7   9 907.156 285.723  38 
   1   7   9 837.755 310.434  16 
   1   7   9 407.563 203.930  28 
  -1   7  -9 930.927 301.438  36 
   1   7   9 421.158 241.348  34 
  -1  -7  -9 727.330 282.716  26 
   1   7   9 673.116 285.005  35 
   1  -7   9 664.165 305.343  35 
   1  -7   9 513.838 245.548  27 
   1  -7   9 482.561 245.988  38 
  -1  -7  -9 718.527 261.833  29 
   1   7  10 31990.4 1299.17  35 
   1  -7  10 33157.6 1438.30  35 
   1  -7  10 33954.3 1415.90  27 
  -1  -7 -10 33640.4 1334.88  26 
  -1   7 -10 31011.8 1375.91  17 
  -1   7 -10 32659.5 1379.64  29 
  -1  -7 -10 33319.1 1331.09  29 
   1   7  10 36949.0 1223.14  28 
   1   7  10 33129.1 1284.38  34 
   1   7  10 33854.1 1315.21  16 
  -1  -7 -11 1688.39 360.577  29 
   1  -7  11 1515.87 341.256  27 
   1   7  11 1570.27 340.267  34 
  -1  -7 -11 1554.59 353.389  26 
   1   7  11 1619.34 350.030  35 
  -1   7 -11 1082.39 348.619  17 
   1  -7  11 1073.42 339.449  35 
   1  -7  11 1298.50 358.397  16 
   1   7  11 1393.94 336.500  16 
  -1   7 -11 1362.05 364.904  29 
  -1   7 -12 14733.1 813.307  29 
   1  -7  12 13680.6 788.329  16 
   1   7  12 14106.5 700.638  16 
   1   7  12 14529.1 770.071  35 
  -1  -7 -12 14724.5 771.420  26 
   1   7  12 13956.1 732.969  34 
  -1   7 -12 14687.4 793.115  17 
   1  -7  12 14634.8 799.768  35 
  -1  -7 -12 14337.5 736.360  29 
  -1  -7 -13 2757.07 283.033  29 
  -1  -7 -13 3152.33 323.623  26 
   1   7  13 2851.78 317.881  35 
   1   7  13 3256.48 309.382  34 
  -1   7 -13 3042.18 319.223  17 
   1   7  13 2838.13 278.015  16 
   1  -7  13 2846.62 309.938  35 
  -1   7 -13 2930.97 340.096  29 
   1  -7  13 3044.39 319.704  16 
  -1   8  13 908.841 238.486  16 
  -1   8  13 734.366 236.336  35 
  -1   8  13 539.526 157.786  34 
  -1  -8  13 576.924 261.585  16 
  -1  -8  13 394.432 207.757  27 
   1   8 -13 798.438 202.433  17 
   1  -8 -13 737.158 225.898  26 
   1   8 -13 479.610 232.725  29 
   1  -8 -12 40.2772 224.832  26 
  -1   8  12 194.713 255.480  16 
  -1   8  12-3.80716 174.083  34 
   1   8 -12-180.539 252.481  29 
   1   8 -12-118.838 228.550  17 
  -1  -8  12 82.9134 172.098  35 
  -1  -8  12-265.685 312.563  16 
  -1  -8  12 157.398 251.415  27 
  -1   8  12 35.7798 226.696  35 
   1  -8 -11 2354.38 413.104  26 
   1   8 -11 1918.91 399.784  17 
  -1   8  11 1955.43 345.853  34 
  -1   8  11 1966.61 402.602  16 
   1   8 -11 1981.56 427.628  29 
  -1   8  11 1801.88 364.915  35 
  -1  -8  11 1837.45 355.359  35 
  -1  -8  11 1691.99 393.672  27 
  -1  -8  10-18.6966 246.013  35 
  -1  -8  10-63.3271 259.752   6 
  -1   8  10-95.3222 197.041  34 
  -1   8  10 43.1440 240.337  16 
   1   8 -10-8.94352 248.789  29 
   1   8 -10 133.283 236.830  17 
  -1  -8  10 34.3029 243.138  27 
  -1   8  10 212.957 232.289  35 
   1  -8 -10 149.615 223.801  26 
   1  -8  -9 14813.1 925.401   1 
   1   8  -9 14302.1 962.155  29 
  -1   8   9 16347.9 948.839  34 
  -1   8   9 14820.8 923.840  35 
   1  -8  -9 15530.5 945.639  26 
  -1  -8   9 13890.8 950.212   6 
  -1  -8   9 14364.8 1039.83  38 
   1  -8  -9 13550.5 894.995  36 
  -1   8   9 14441.7 913.561  38 
   1   8  -9 14045.7 918.535  36 
  -1   8   9 14665.1 906.564  22 
   1   8  -9 14950.1 922.942  21 
  -1   8   9 14756.0 922.690  16 
  -1  -8   9 13485.6 973.112  27 
  -1   8   8 357.278 232.597  22 
   1  -8  -8 126.807 192.900   1 
   1   8  -8 334.171 213.529  36 
  -1   8   8 408.385 243.411  38 
  -1  -8   8 490.854 264.749  38 
   1   8  -8 518.315 250.308  21 
   1  -8  -8 378.244 245.172  36 
  -1   8   7 159482. 2759.63  38 
   1   8  -7 137774. 2539.46  21 
   1  -8  -7 139764. 2606.63  36 
  -1  -8   7 128052. 2957.03  23 
   1  -8  -7 136417. 2606.19   1 
  -1  -8   7 143600. 2998.55  38 
   1   8  -7 141125. 2543.58  36 
   1   8  -7 151083. 2439.38  37 
  -1   8   7 133438. 2521.33  22 
   1  -8  -6 28380.9 1161.53   1 
   1   8  -6 28270.6 1072.47  21 
   1   8  -6 28447.3 1061.87  36 
  -1   8   6 32065.9 1176.64  38 
   1  -8  -6 29411.0 1143.32  36 
  -1  -8   6 28428.3 1253.97  38 
   1   8  -6 30126.8 1047.69  37 
  -1  -8   6 27984.5 1305.83  23 
  -1   8   6 27838.6 1129.20  22 
   1  -8  -6 30540.0 1018.15  40 
   1   8  -5 147810. 2238.63  21 
   1   8  -5 146552. 2157.51  36 
  -1  -8   5 143915. 2496.80  38 
  -1   8   5 149624. 2434.20  22 
   1  -8  -5 154024. 2529.79   1 
   1  -8  -5 144741. 2398.63  36 
   1  -8  -5 145978. 2225.28  40 
   1   8  -5 143712. 2138.40  37 
  -1  -8   5 141747. 2611.96  23 
  -1  -8   4 2027.35 266.960  38 
   1  -8  -4 2552.39 331.324  36 
  -1   8   4 2221.24 325.212  37 
   1  -8  -4 2652.74 347.278   1 
   1   8  -4 2205.04 264.163  36 
  -1   8   4 2240.87 333.968  22 
   1   8  -4 2359.16 277.268  37 
  -1   8   4 2509.25 298.457  38 
   1  -8  -4 2359.29 321.527  40 
   1   8  -4 2490.98 300.357  21 
  -1  -8   4 2226.17 289.202  40 
   1  -8  -3 24718.6 857.731  36 
  -1   8   3 24828.3 741.544  38 
   1  -8  -3 24019.8 701.416  24 
   1  -8  -3 25115.6 912.493   1 
  -1  -8   3 25683.5 1173.45  40 
   1   8  -3 23575.2 782.433  21 
   1  -8  -3 23574.7 947.522  40 
  -1  -8   3 23517.2 667.401  38 
   1   8  -3 23774.0 758.973  37 
   1   8  -3 27158.5 695.569  36 
  -1   8   3 23713.2 638.492  39 
  -1   8   3 24683.2 950.681  37 
  -1   8   3 21538.5 873.940  22 
  -1  -8   3 23340.4 840.224  24 
  -1   8   2 5382.03 459.635  37 
  -1  -8   2 6229.60 711.594  40 
   1  -8  -2 5780.50 333.557  24 
  -1   8   2 5743.76 439.923  21 
   1   8  -2 5794.32 273.130  36 
   1   8  -2 5428.56 357.756  37 
  -1   8   2 5604.39 362.284  39 
   1   8  -2 5569.29 303.120   2 
   1  -8  -2 5436.14 455.088  40 
  -1  -8   2 5319.11 390.738  24 
   1   8  -2 5550.31 369.479  21 
  -1   8   2 6289.11 272.438   4 
   1  -8  -2 5772.07 413.797   1 
  -1  -8   2 5960.12 257.933   4 
  -1  -8   1 73614.3 1296.86  24 
  -1   8   1 72295.7 1503.53  37 
  -1   8   1 71083.9 1223.49   2 
  -1   8   1 72479.8 1394.17  21 
  -1   8   1 74778.1 1415.40  39 
   1   8  -1 71661.9 1209.12  21 
   1   8  -1 72817.2 1252.71  37 
   1  -8  -1 68250.5 1533.29  40 
  -1  -8   1 74550.6 769.254  25 
   1  -8  -1 73573.1 1118.22  24 
  -1  -8   1 74068.1 2190.36  40 
   1   8  -1 69842.1 1024.84   2 
  -1   8   0 874.045 152.321   2 
  -1   8   0 820.162 171.446  21 
   1   8   0 762.855 150.462  21 
   1   8   0 775.355 158.124  37 
  -1  -8   0 808.693 113.466  25 
   1  -8   0 809.528 145.214  24 
   1  -8   0 467.025 188.550  40 
  -1  -8   0 554.685 205.344  40 
  -1  -8   0 1109.68 199.164  24 
  -1   8   0 693.724 174.973  37 
   1   8   0 893.581 139.380   2 
  -1   8  -1 205.124 114.381   2 
  -1   8  -1 229.700 52.8511   3 
   1   8   1 258.856 116.442  21 
   1   8   1 296.178 134.496  37 
  -1   8  -1 414.047 153.012  37 
  -1  -8  -1 276.294 144.039  24 
  -1   8  -1 204.796 109.312  21 
   1  -8   1 294.220 186.938  40 
   1  -8   1 422.608 148.736  24 
  -1  -8  -1 292.161 58.0495   3 
   1  -8   1 323.193 103.581  23 
  -1  -8  -1 602.505 104.636  36 
  -1  -8  -1 669.746 162.268   1 
  -1  -8  -2 2049.51 283.198   1 
  -1  -8  -2 2097.32 272.822  24 
  -1  -8  -2 2020.21 184.451   3 
   1   8   2 2009.07 214.926  23 
  -1   8  -2 1816.32 225.355  37 
  -1  -8  -2 2323.05 245.503  36 
  -1   8  -2 1916.65 180.613   3 
   1  -8   2 2215.48 303.473  40 
   1   8   2 2027.41 156.797  39 
  -1   8  -2 2114.99 244.340   2 
  -1  -8  -2 2043.01 337.089  40 
  -1   8  -2 2006.15 240.229  21 
   1  -8   2 1889.93 226.668  23 
   1   8   2 1795.26 250.002  37 
   1   8   2 1849.89 243.330  21 
  -1  -8  -3 487120. 4095.71   1 
  -1   8  -3 488334. 3502.67  37 
  -1  -8  -3 495043. 3853.86  24 
   1   8   3 497257. 3456.89  23 
  -1   8  -3 493825. 3542.24  21 
   1  -8   3 488244. 3831.89  23 
   1   8   3 483470. 3831.58  22 
   1   8   3 485805. 3902.56  37 
  -1   8  -3 487043. 3609.84  36 
   1  -8   3 480398. 4108.71  40 
  -1  -8  -3 490802. 4479.48  40 
  -1   8  -4 160.327 99.7649  37 
   1  -8   4 348.557 218.607  23 
   1  -8   4 203.417 136.841  40 
  -1   8  -4 351.036 180.716  36 
   1   8   4 459.028 160.235  23 
  -1  -8  -4 306.540 184.995  40 
  -1  -8  -4 505.049 225.238   1 
  -1  -8  -4 277.684 173.317  36 
  -1   8  -4 305.264 146.224  21 
   1   8   4 351.085 179.251  37 
   1   8   4 351.852 196.107  22 
   1  -8   5 282971. 3591.65  23 
  -1   8  -5 299634. 3175.61  21 
  -1   8  -5 290039. 3474.92  36 
  -1  -8  -5 281546. 3454.85  36 
  -1  -8  -5 289109. 3552.09   1 
   1   8   5 287654. 3330.42  22 
   1   8   5 291087. 3252.61  37 
   1   8   5 300024. 2923.57  23 
  -1  -8  -5 292837. 3456.17  40 
   1   8   6 409.823 200.998  38 
   1  -8   6 402.646 221.577  38 
   1   8   6 172.363 149.629  23 
   1   8   6 261.474 184.536  22 
  -1   8  -6 291.809 203.573  36 
  -1   8  -6 382.167 173.121  21 
  -1  -8  -6 259.610 212.928   1 
  -1  -8  -6 706.286 283.029  36 
   1  -8   6 505.606 247.553  23 
  -1  -8  -7 14002.5 878.658   1 
  -1  -8  -7 16460.5 885.753  36 
   1  -8   7 13587.3 876.089  38 
   1   8   7 14923.1 814.496  38 
   1   8   7 13903.6 828.320  22 
  -1   8  -7 13147.2 869.230  36 
   1  -8   7 12460.9 889.391  23 
   1  -8   8-69.9689 190.372  38 
   1   8   8 177.662 194.541  22 
  -1   8  -8-111.980 207.052  36 
   1   8   8-198.703 190.698  34 
  -1   8  -8-109.045 219.536  29 
   1   8   8 9.02530 167.193  38 
   1  -8   8-121.531 236.940  23 
  -1  -8  -8-76.8863 209.616   1 
   1   8   9 11363.8 806.660  22 
   1  -8   9 10154.7 863.807  23 
  -1   8  -9 11974.0 868.138  29 
  -1   8  -9 10718.1 852.998  17 
   1   8   9 13127.5 837.410  38 
   1   8   9 12505.8 833.827  35 
   1   8   9 13907.3 865.412  34 
  -1  -8  -9 11608.2 822.815  26 
   1   8   9 13067.0 770.447  28 
   1  -8   9 11713.4 866.579  27 
   1  -8   9 12386.2 907.939  35 
   1  -8   9 12294.0 888.280  38 
  -1  -8  -9 12234.1 862.275   1 
  -1   8  -9 11225.3 878.439  36 
  -1  -8  -9 11974.3 822.324  29 
   1   8   9 11962.6 809.796  16 
   1   8  10 787.711 309.811  16 
   1  -8  10 777.624 336.968  27 
  -1   8 -10 661.036 304.129  17 
  -1  -8 -10 519.045 263.630  29 
   1   8  10 448.331 204.758  28 
  -1   8 -10 765.981 349.633  29 
   1   8  10 780.155 284.347  34 
   1  -8  10 667.961 314.876  35 
  -1  -8 -10 673.090 279.615  26 
   1   8  10 627.525 268.124  35 
   1  -8  11 30425.0 1287.79  16 
   1   8  11 33242.8 1191.31  16 
   1   8  11 32912.8 1228.29  35 
  -1  -8 -11 32822.2 1233.76  26 
   1  -8  11 30967.4 1325.68  35 
  -1  -8 -11 34523.3 1232.71  29 
  -1   8 -11 33322.4 1318.51  29 
   1  -8  11 33201.5 1323.16  27 
   1   8  11 32964.6 1213.59  34 
  -1   8 -11 33781.5 1351.34  17 
  -1   8 -12 11.4955 209.238  17 
  -1  -8 -12 215.778 186.151  29 
  -1  -8 -12 74.5750 204.315  26 
  -1   8 -12 93.7809 237.624  29 
   1   8  12 275.034 229.644  35 
   1   8  12 249.015 199.848  16 
   1   8  12 113.749 167.549  34 
   1  -8  12 210.528 212.020  35 
   1  -8  12 55.0695 245.455  16 
  -1  -8 -13 5283.81 398.508  26 
   1  -8  13 4995.36 386.543  16 
   1  -8  13 4974.65 370.711  35 
  -1  -8 -13 5270.48 349.145  29 
  -1   8 -13 5070.83 393.184  17 
   1   8  13 5385.49 378.511  34 
  -1   8 -13 5300.11 420.410  29 
   1   8  13 4372.46 296.178  30 
   1   8  13 5428.16 394.987  35 
   1   9 -13-4.89582 178.902  29 
  -1  -9  13-101.183 217.923  16 
  -1   9  13 44.0771 147.776  30 
  -1   9  13 264.832 194.080  16 
  -1   9  13 38.8090 167.017  35 
   1  -9 -13-19.9699 155.084  26 
   1   9 -13-221.824 164.475  17 
  -1  -9  13-242.251 195.438  27 
  -1   9  13-14.1818 123.090  34 
  -1   9  12 250.539 236.185  16 
  -1  -9  12-181.866 220.482  27 
   1  -9 -12-135.266 229.646  26 
  -1   9  12 164.519 181.610  34 
   1   9 -12-105.673 243.787  29 
  -1   9  12-41.6237 217.250  35 
  -1  -9  12-269.278 319.880  16 
   1   9 -12-2.12600 220.306  17 
  -1  -9  11 1898.93 373.683  35 
  -1   9  11 1966.29 387.616  16 
   1   9 -11 2152.10 404.523  17 
  -1  -9  11 1895.68 426.060  27 
  -1   9  11 2005.31 372.159  35 
  -1   9  11 2124.19 379.085  34 
   1   9 -11 1836.14 422.434  29 
   1  -9 -11 1774.53 357.388  26 
  -1  -9  10 62.1140 252.965  27 
  -1   9  10 191.774 272.659  16 
  -1   9  10 15.1765 229.487  34 
   1   9 -10 171.367 256.757  29 
   1   9 -10 142.057 292.549  17 
  -1   9  10-195.335 229.416  35 
   1  -9 -10 131.909 221.485  26 
  -1  -9  10-294.710 325.995   6 
  -1   9   9 3382.14 484.717  22 
  -1   9   9 3604.91 473.682  34 
  -1   9   9 4125.80 504.027  35 
   1  -9  -9 3172.73 478.026  26 
  -1  -9   9 3757.17 549.308   6 
   1  -9  -9 4211.73 547.970  36 
   1   9  -9 3964.40 569.191  29 
   1   9  -9 2106.90 389.459  36 
  -1   9   9 3829.94 499.160  16 
   1  -9  -9 3446.32 494.238   1 
  -1  -9   9 2839.19 492.506  27 
  -1  -9   9 3133.25 542.070  24 
   1   9  -9 3343.81 457.835  21 
   1  -9  -8 47661.8 1629.97   1 
   1   9  -8 46027.5 1575.22  36 
  -1   9   8 46451.2 1579.20  22 
  -1  -9   8 49078.7 1825.14  38 
   1   9  -8 48472.3 1617.78  21 
   1  -9  -8 42963.2 1529.16  36 
   1  -9  -7 9249.73 685.177  36 
  -1  -9   7 8917.73 750.467  38 
   1   9  -7 9228.43 705.427  21 
  -1   9   7 8366.13 671.218  22 
  -1   9   7 10645.3 716.217  38 
   1   9  -7 8563.60 662.156  36 
   1  -9  -7 8713.59 717.873   1 
  -1   9   6 8525.01 652.166  22 
   1  -9  -6 8274.52 657.005   1 
   1   9  -6 8740.35 590.407  37 
  -1   9   6 10704.9 681.811  38 
  -1  -9   6 9156.73 706.981  38 
   1   9  -6 8738.18 612.638  36 
   1  -9  -6 8657.42 634.353  36 
   1  -9  -6 10066.3 634.637  40 
   1   9  -6 8448.94 626.370  21 
   1  -9  -5 16755.3 796.517  40 
   1   9  -5 17261.6 805.119  21 
  -1  -9   5 17315.4 838.799  38 
  -1   9   5 19496.0 833.199  38 
   1  -9  -5 18186.9 914.058   1 
   1  -9  -5 17836.4 851.742  36 
   1   9  -5 17193.3 761.594  36 
  -1   9   5 17544.2 873.253  22 
   1   9  -5 17149.2 776.381  37 
   1  -9  -4 114303. 2164.31   1 
  -1  -9   4 109728. 2054.13  24 
  -1   9   4 115622. 2185.89  37 
   1   9  -4 113331. 1695.78  36 
   1   9  -4 111223. 1842.85  37 
  -1   9   4 124100. 1865.82  38 
   1  -9  -4 106666. 1991.59  40 
  -1  -9   4 123699. 2171.91  40 
  -1  -9   4 118661. 1800.30  38 
   1  -9  -4 111971. 2017.38  36 
   1   9  -4 108897. 1869.78  21 
  -1   9   4 112058. 2059.31  22 
   1   9  -3 2438.89 272.278  37 
   1  -9  -3 2047.64 234.649  24 
   1  -9  -3 2538.13 295.464  36 
  -1   9   3 2437.73 321.122  22 
  -1  -9   3 2238.83 313.324  24 
   1   9  -3 2342.21 238.715   2 
  -1  -9   3 2667.50 412.013  40 
  -1   9   3 2334.86 224.084  38 
   1   9  -3 2398.33 290.923  21 
   1   9  -3 2376.84 224.548  36 
   1  -9  -3 2080.41 314.718  40 
   1  -9  -3 2544.43 327.389   1 
  -1  -9   3 2343.15 208.074  38 
  -1   9   3 2267.00 215.652  39 
  -1   9   3 2249.95 344.288  37 
   1   9  -2 24408.3 806.848  37 
   1  -9  -2 25483.4 869.864   1 
  -1  -9   2 27864.2 1334.09  40 
  -1   9   2 27267.9 806.451  39 
  -1  -9   2 25126.3 484.946   4 
  -1   9   2 24755.5 966.044  37 
   1  -9  -2 24184.6 968.585  40 
  -1  -9   2 23805.6 832.883  24 
   1  -9  -2 25339.7 736.553  24 
   1   9  -2 24930.3 674.397   2 
  -1   9   2 26508.4 504.920   4 
   1   9  -2 26443.3 811.817  21 
  -1   9   2 25430.0 948.104  21 
  -1  -9   1 11215.0 844.738  40 
   1  -9  -1 11478.8 493.815  24 
   1  -9  -1 10570.8 643.301  40 
   1   9  -1 10742.7 543.582  37 
  -1  -9   1 11304.5 551.006  24 
  -1   9   1 11699.7 527.526   2 
  -1   9   1 10956.7 575.089  39 
   1   9  -1 11507.5 534.323  21 
  -1  -9   1 11869.8 305.764  25 
  -1   9   1 10906.6 625.105  37 
   1   9  -1 11829.0 459.373   2 
  -1   9   1 11601.5 601.344  21 
   1   9   0 20190.4 693.117  21 
   1   9   0 19328.9 608.207   2 
  -1  -9   0 20582.4 525.074  25 
   1  -9   0 18865.2 617.569  24 
   1   9   0 20268.0 717.450  37 
   1  -9   0 19314.0 858.579  40 
  -1   9   0 20645.7 814.240  37 
  -1  -9   0 19709.5 737.150  24 
  -1  -9   0 19907.6 1061.93  40 
  -1   9   0 19975.5 743.909  21 
  -1   9   0 18676.2 652.036   2 
   1   9   1-6.68582 116.727  21 
  -1  -9  -1 177.172 68.6807  36 
  -1  -9  -1 15.6466 127.843  24 
  -1   9  -1 94.1608 115.195  37 
  -1   9  -1-8.96574 99.6542  21 
   1  -9   1 51.8638 30.3004  38 
  -1  -9  -1 53.4505 111.172   1 
   1  -9   1 17.4695 157.886  40 
  -1   9  -1 139.449 108.282   2 
   1   9   1 184.440 148.875  37 
  -1  -9  -1-75.8117 234.583  40 
   1  -9   1 10.6967 103.958  24 
  -1  -9  -2 40727.9 953.626  36 
   1   9   2 40734.1 922.317  23 
   1   9   2 39489.5 1079.00  21 
  -1   9  -2 40033.5 1080.36  37 
  -1  -9  -2 42736.4 775.822   3 
   1  -9   2 41585.4 973.108  23 
  -1  -9  -2 40821.5 1118.68  24 
   1   9   2 41517.9 755.455  39 
  -1   9  -2 40631.9 1039.47  21 
   1   9   2 40988.7 1132.75  37 
  -1  -9  -2 41428.3 1176.15   1 
  -1  -9  -2 37551.1 1303.37  40 
   1  -9   2 38201.9 1236.00  40 
  -1   9  -2 40847.0 726.029   3 
  -1   9  -2 40578.3 1012.47   2 
   1   9   3 10371.1 607.890  37 
  -1  -9  -3 10828.3 713.394  40 
   1   9   3 9951.23 582.407  22 
   1  -9   3 10912.2 589.006  23 
  -1   9  -3 9950.48 484.726   3 
  -1  -9  -3 11208.6 593.815  36 
  -1   9  -3 10503.8 566.482  21 
  -1   9  -3 9773.73 548.690  37 
  -1  -9  -3 10155.2 597.324  24 
  -1   9  -3 9077.11 544.200  36 
  -1  -9  -3 10804.2 649.495   1 
   1   9   3 10896.7 527.150  23 
   1  -9   3 9905.38 645.739  40 
  -1  -9  -3 11396.6 547.511   3 
   1  -9   4 456856. 4204.48  40 
   1   9   4 481885. 4172.73  22 
   1  -9   4 470321. 4302.95  23 
  -1  -9  -4 484583. 4189.65  36 
  -1  -9  -4 483188. 4586.55  40 
  -1   9  -4 475469. 3939.36  21 
  -1  -9  -4 473625. 4405.73   1 
   1   9   4 498169. 3593.50  23 
  -1   9  -4 474318. 3774.79  37 
  -1   9  -4 482642. 4115.13  36 
   1   9   4 474473. 4114.63  37 
   1   9   5 156.875 134.847  23 
   1   9   5 151.486 187.174  22 
   1   9   5 67.0183 133.033  38 
  -1   9  -5-51.1977 167.235  36 
   1  -9   5 136.975 199.464  23 
   1   9   5 211.817 165.254  37 
  -1  -9  -5 242.982 196.693   1 
  -1  -9  -5 62.9574 165.176  40 
  -1  -9  -5 288.626 198.479  36 
   1  -9   5 7.11994 158.212  38 
  -1   9  -5 51.8805 124.698  21 
   1   9   6 1587.74 307.225  22 
  -1   9  -6 1195.11 309.378  36 
  -1  -9  -6 2123.02 375.060  36 
  -1  -9  -6 1559.06 318.240   1 
   1  -9   6 1162.15 293.049  38 
  -1   9  -6 1451.53 279.788  21 
   1   9   6 1422.44 261.809  38 
   1  -9   6 1125.92 322.073  23 
   1   9   7 4344.46 456.845  38 
   1  -9   7 3320.37 451.234  38 
  -1   9  -7 3208.36 472.110  36 
   1   9   7 3332.58 440.357  22 
  -1  -9  -7 3097.10 447.767   1 
   1  -9   7 3045.93 475.393  23 
   1   9   8 1873.81 350.452  22 
   1   9   8 1661.87 320.728  28 
   1  -9   8 1218.60 361.364  23 
  -1   9  -8 1999.91 393.263  39 
   1  -9   8 1488.89 363.748  27 
  -1  -9  -8 1522.17 328.338  26 
   1   9   8 1968.19 363.755  34 
   1   9   8 1410.11 296.030  35 
   1   9   8 1636.97 320.759  38 
  -1   9  -8 1760.45 368.022  29 
  -1   9  -8 1509.63 373.568  20 
  -1   9  -8 1547.33 373.207  36 
  -1  -9  -8 1146.26 292.290  29 
  -1  -9  -8 1757.40 365.711   1 
   1   9   8 1381.12 322.394  16 
   1  -9   8 1765.53 392.981  35 
   1  -9   8 1815.52 363.854  38 
   1  -9   9 108.801 232.814  35 
  -1   9  -9 139.299 264.177  17 
   1   9   9 507.441 243.781  28 
  -1   9  -9 559.391 310.980  29 
   1  -9   9 472.572 306.126  27 
   1   9   9 230.865 250.050  16 
  -1  -9  -9 356.598 232.531  26 
  -1  -9  -9 382.747 243.886  29 
  -1   9  -9 186.281 246.712  20 
   1   9   9 423.620 249.767  35 
   1   9   9 445.445 241.542  34 
  -1   9 -10 20623.9 1129.64  29 
  -1  -9 -10 21215.0 1074.27  26 
   1  -9  10 19964.5 1142.86  35 
   1   9  10 22169.5 1058.22  16 
  -1   9 -10 20121.1 1136.48  17 
   1   9  10 21658.6 1053.39  35 
   1  -9  10 21639.2 1165.83  27 
   1   9  10 21526.5 1050.03  34 
  -1  -9 -10 21961.9 1055.09  29 
   1   9  10 22668.3 974.337  28 
   1   9  11 6023.02 538.900  34 
   1  -9  11 5003.13 560.479  35 
  -1   9 -11 5863.34 596.313  29 
   1   9  11 6112.85 538.312  16 
  -1  -9 -11 5981.10 548.367  29 
   1   9  11 5924.82 536.372  35 
  -1   9 -11 6019.67 618.308  17 
  -1  -9 -11 5927.39 551.125  26 
   1  -9  11 6135.81 607.335  27 
   1  -9  11 5340.96 580.346  16 
  -1   9 -12 13852.5 780.362  29 
   1   9  12 13531.4 707.723  35 
  -1  -9 -12 13367.3 668.984  29 
   1  -9  12 13420.8 735.997  27 
   1   9  12 13542.9 702.177  34 
  -1   9 -12 14951.1 787.353  17 
   1   9  12 13737.5 663.980  16 
   1  -9  12 12968.1 730.095  35 
   1  -9  12 12134.5 731.051  16 
  -1  -9 -12 13787.5 720.770  26 
   1   9  13 797.427 190.053  35 
  -1  -9 -13 886.297 195.406  26 
  -1   9 -13 695.474 198.865  29 
   1  -9  13 792.647 171.770  35 
   1   9  13 843.191 178.075  34 
  -1  -9 -13 826.405 162.923  29 
   1  -9  13 752.229 182.727  16 
  -1   9 -13 771.712 197.973  17 
   1 -10 -13 2142.79 289.688  26 
  -1  10  13 2172.40 290.936  35 
   1  10 -13 1630.25 243.611  17 
  -1 -10  13 1761.29 286.263  27 
  -1 -10  13 1651.75 309.255  16 
  -1  10  13 1548.41 237.813  30 
   1  10 -13 2005.98 305.330  29 
  -1  10  13 2126.14 252.067  34 
  -1 -10  12 183.839 240.124  27 
  -1 -10  12-19.0208 283.443  16 
   1 -10 -12 465.816 237.286  26 
   1  10 -12 450.147 273.432  29 
   1  10 -12 651.137 265.943  17 
  -1  10  12 498.523 244.928  35 
  -1  10  12 361.618 198.286  34 
  -1  10  12 528.764 250.486  16 
   1  10 -11 84.0090 263.673  17 
  -1 -10  11 180.841 270.774  27 
  -1  10  11 228.208 266.972  16 
   1  10 -11 5.69924 292.691  29 
  -1  10  11 91.4475 219.299  35 
  -1  10  11 278.836 218.223  34 
   1 -10 -11-43.7482 229.646  26 
  -1 -10  10 2129.72 449.650  27 
  -1  10  10 2244.37 395.099  34 
  -1  10  10 2150.33 396.339  35 
  -1 -10  10 1723.97 413.953   6 
  -1  10  10 1989.80 382.576  16 
   1 -10 -10 1993.93 373.551  26 
   1  10 -10 1129.59 374.289  29 
  -1  10   9 11.8427 213.766  35 
  -1  10   9 249.788 210.137  22 
   1  10  -9-126.105 188.222  21 
  -1 -10   9 232.581 224.782  24 
  -1 -10   9 92.4737 284.222  27 
   1 -10  -9 231.720 252.373   1 
   1 -10  -9-64.9352 233.061  26 
  -1  10   9 218.723 226.536  16 
   1  10  -9 185.663 181.306  36 
   1  10  -9 253.576 279.577  29 
  -1  10   9 73.9437 202.654  34 
  -1 -10   9 261.172 306.262   6 
   1  10  -8 1441.36 330.135  36 
  -1 -10   8 1353.04 377.502  27 
  -1  10   8 1692.87 352.033  16 
   1 -10  -8 1321.06 321.264  36 
   1 -10  -8 1251.24 308.401  26 
  -1 -10   8 1216.83 382.399  24 
   1  10  -8 1591.63 396.007  29 
   1  10  -8 1277.67 310.229  21 
  -1  10   8 1399.70 312.682  35 
  -1  10   8 1679.28 342.431  22 
  -1  10   8 1394.54 324.197  34 
   1 -10  -8 1661.67 359.783   1 
   1 -10  -7 25447.0 1111.94  36 
  -1 -10   7 23809.6 1268.40  24 
  -1  10   7 23473.0 1109.25  22 
   1  10  -7 23770.8 1104.45  21 
   1 -10  -7 22983.5 1135.56   1 
   1  10  -7 24778.3 1108.39  36 
   1  10  -6 2.38923 149.889  36 
   1 -10  -6 184.630 151.427  40 
   1  10  -6-25.7284 145.520  21 
   1 -10  -6-135.585 212.713  36 
   1 -10  -6 53.4513 185.472   1 
   1  10  -6-2.70579 129.975  37 
  -1 -10   6 23.0146 210.816  24 
  -1  10   6 19.8389 170.439  22 
   1  10  -5 30644.0 1013.63  36 
  -1 -10   5 32654.8 1097.62  38 
  -1  10   5 33250.2 1052.64  38 
  -1 -10   5 28617.5 1204.71  24 
   1 -10  -5 30004.1 1189.97   1 
   1 -10  -5 30782.1 1128.88  36 
   1  10  -5 28873.7 1075.94  21 
   1  10  -5 30473.2 1057.11  37 
  -1  10   5 30521.7 1146.61  22 
   1 -10  -5 29311.2 1091.85  40 
   1 -10  -4 1085.79 252.595  40 
   1  10  -4 1244.27 211.838  36 
  -1 -10   4 1150.48 225.341  40 
  -1 -10   4 1311.82 291.002  24 
   1  10  -4 1299.51 236.448  37 
   1  10  -4 1137.68 246.177  21 
  -1 -10   4 1258.77 187.082  38 
   1  10  -4 1173.35 210.288   2 
  -1  10   4 1030.40 269.992  22 
  -1  10   4 1220.31 276.668  37 
   1 -10  -4 1410.88 251.385  36 
   1 -10  -4 1200.93 271.786   1 
   1  10  -3 3089.15 329.057  21 
  -1  10   3 3037.34 264.894  39 
   1 -10  -3 2572.85 367.105  40 
  -1 -10   3 2843.94 424.721  40 
  -1 -10   3 2716.93 339.558  24 
   1 -10  -3 2874.68 358.398   1 
   1  10  -3 3120.27 258.372  36 
  -1  10   3 3209.03 395.626  37 
  -1  10   3 3069.97 371.293  22 
   1 -10  -3 3109.95 340.725  36 
   1  10  -3 3016.18 274.020   2 
   1 -10  -3 2870.75 280.942  24 
   1  10  -3 2986.47 334.703  37 
  -1  10   2 31.1638 141.064  21 
   1 -10  -2-45.3917 130.209   1 
  -1 -10   2 26.6579 162.974  24 
  -1 -10   2-30.7795 226.293  40 
   1  10  -2 56.7820 127.145  21 
   1  10  -2 83.6690 125.495  37 
  -1  10   2 24.2401 109.054  39 
  -1  10   2 65.6251 158.784  37 
   1 -10  -2-0.46125 105.736  24 
   1 -10  -2-13.5579 167.338  40 
   1  10  -2-20.4136 92.5802   2 
  -1 -10   1 780.327 203.116  24 
   1 -10  -1 862.638 175.382  24 
  -1  10   1 788.384 226.495  21 
   1  10  -1 772.995 149.407   2 
   1  10  -1 1404.58 221.428  37 
  -1  10   1 643.530 194.921  37 
  -1  10   1 821.131 183.738   2 
  -1 -10   1 927.665 301.325  40 
   1  10  -1 919.645 193.168  21 
  -1  10   1 696.327 192.401  39 
   1 -10  -1 775.581 234.606  40 
  -1  10   0 253.295 158.396  21 
   1  10   0 190.566 131.289  21 
   1 -10   0 136.319 186.796  40 
  -1 -10   0 244.900 79.2565  25 
  -1  10   0 179.532 133.471   2 
  -1  10   0 142.389 130.518  37 
  -1 -10   0 236.274 157.613  24 
  -1 -10   0 219.184 117.530   1 
   1 -10   0 205.279 124.915  24 
  -1  10   0 246.613 171.917  39 
   1  10   0 232.497 104.407   2 
  -1 -10   0-79.8797 253.181  40 
   1  10   0 124.134 127.856  37 
   1 -10   1 2362.22 280.585  24 
  -1 -10  -1 3010.11 426.443  40 
  -1 -10  -1 2616.38 309.768  24 
  -1  10  -1 2334.98 296.847  21 
  -1  10  -1 2531.88 321.333  37 
  -1 -10  -1 2287.85 280.123   1 
   1 -10   1 3017.26 417.819  40 
   1  10   1 2690.87 298.364  21 
   1  10   1 2603.42 319.226  37 
  -1  10  -1 2505.48 270.571   2 
  -1  10  -2 12313.3 589.253   2 
   1  10   2 12897.6 655.541  21 
   1 -10   2 12058.5 737.586  40 
   1 -10   2 12416.7 644.660  24 
  -1  10  -2 12304.1 657.741  37 
  -1 -10  -2 12026.1 648.681  24 
  -1 -10  -2 12638.8 683.750   1 
  -1  10  -2 12817.3 628.311  21 
  -1 -10  -2 11764.2 759.692  40 
   1  10   2 13657.2 551.573  23 
   1  10   2 12525.6 453.049  39 
   1  10   2 12017.7 661.222  37 
  -1  10  -3 169421. 1847.06   3 
   1  10   3 171851. 2515.34  37 
  -1 -10  -3 178430. 2509.70  24 
   1  10   3 180045. 2102.22  23 
  -1  10  -3 169881. 2290.40   2 
  -1  10  -3 168128. 2311.74  21 
   1 -10   3 166489. 2679.63  40 
  -1 -10  -3 166583. 2557.75   1 
   1 -10   3 175279. 2333.71  23 
  -1  10  -3 164830. 2336.44  37 
   1  10   3 170583. 2464.23  22 
  -1 -10  -3 170321. 2793.56  40 
  -1  10  -4 19709.1 785.501   3 
  -1 -10  -4 21511.3 910.487  24 
   1 -10   4 20048.6 841.781  38 
   1  10   4 21069.9 738.474  23 
   1 -10   4 18803.6 899.157  40 
  -1  10  -4 20629.7 872.041  21 
   1 -10   4 21112.0 926.727  23 
  -1 -10  -4 20057.9 984.267  40 
   1  10   4 20074.1 889.558  22 
  -1 -10  -4 21194.6 973.893   1 
  -1  10  -4 19580.8 812.787  37 
   1  10   4 21196.3 773.848  38 
  -1  10  -4 19214.7 851.191  36 
   1  10   4 19500.1 884.807  37 
   1 -10   5 63830.2 1645.07  38 
   1  10   5 61141.8 1616.36  22 
  -1 -10  -5 60899.1 1694.26  40 
   1 -10   5 58512.8 1684.08  23 
   1  10   5 59447.9 1581.71  37 
  -1  10  -5 58825.0 1639.04  36 
  -1  10  -5 61548.1 1569.01  21 
  -1 -10  -5 58900.9 1666.25   1 
  -1 -10  -6 269.021 195.643   1 
  -1  10  -6 250.864 212.285  36 
   1  10   6 299.064 202.708  22 
  -1  10  -6 295.223 177.965  21 
   1 -10   6 229.757 206.901  23 
  -1  10  -7 2163.06 388.224  36 
   1  10   7 1926.06 364.754  22 
  -1 -10  -7 1970.47 369.071   1 
   1 -10   7 1686.63 396.670  23 
   1 -10   8-2.36868 211.158  35 
  -1  10  -8 99.8608 205.959  20 
   1  10   8 27.5829 192.250  22 
   1  10   8 44.1036 155.704  35 
  -1 -10  -8 6.23926 224.500   1 
   1 -10   8 254.220 234.656  27 
   1  10   8-55.0542 203.945  28 
  -1  10  -8 113.158 162.850  36 
  -1 -10  -8 320.738 195.071  29 
  -1  10  -8-2.92948 229.688  29 
  -1 -10  -8 9.34255 184.132  26 
   1  10   8 73.1307 200.620  34 
   1 -10   8-63.6743 227.511   6 
   1 -10   8-11.2665 241.322  23 
   1  10   8-7.26738 180.922  16 
  -1  10  -8-57.7209 183.341  39 
  -1  10  -9 11868.9 875.229  20 
   1  10   9 13146.2 774.484  28 
   1  10   9 11964.7 804.162  35 
  -1  10  -9 11516.6 903.642  17 
  -1 -10  -9 12753.4 831.510  29 
   1  10   9 13142.4 851.323  16 
   1 -10   9 11422.9 877.473  27 
  -1 -10  -9 11623.7 823.172  26 
   1 -10   9 13055.7 926.361  35 
   1  10   9 12732.5 835.128  34 
  -1  10  -9 12755.3 920.459  29 
   1  10  10 2645.65 371.186  28 
   1 -10  10 2412.18 432.244  35 
  -1  10 -10 2682.74 464.949  29 
  -1  10 -10 2929.78 439.535  20 
  -1 -10 -10 2549.73 413.066  26 
   1  10  10 2805.98 414.371  16 
   1  10  10 2825.43 424.416  34 
   1 -10  10 2672.26 481.789  27 
  -1 -10 -10 2817.95 429.320  29 
   1  10  10 2487.54 399.772  35 
  -1  10 -10 2517.39 486.219  17 
  -1  10 -11 6730.00 640.202  29 
   1  10  11 8026.83 533.446  28 
  -1 -10 -11 8195.11 595.244  29 
  -1 -10 -11 7177.63 590.342  26 
   1  10  11 7010.56 576.676  35 
   1  10  11 6599.17 572.519  34 
   1 -10  11 6712.72 623.124  27 
   1 -10  11 6393.47 589.357  35 
   1  10  11 7369.59 577.241  16 
   1 -10  11 6092.58 595.679  16 
  -1  10 -11 6807.12 646.959  17 
   1  10  12 10566.5 606.817  35 
  -1  10 -12 12244.2 714.848  29 
  -1  10 -12 11025.5 689.083  17 
  -1 -10 -12 11625.2 655.406  26 
  -1 -10 -12 11004.6 587.209  29 
   1 -10  12 10424.2 632.278  27 
   1 -10  12 11049.5 637.195  35 
   1  10  12 11206.2 622.354  34 
   1  10  12 10095.2 522.627  30 
   1 -10  12 10123.8 640.472  16 
  -1  11  13 1156.40 196.299  30 
  -1 -11  13 893.116 218.311  27 
   1 -11 -13 1003.53 212.927  26 
   1  11 -13 1213.90 247.272  29 
  -1  11  13 1226.51 224.527  35 
  -1 -11  13 1032.17 252.412  16 
  -1  11  13 1274.13 199.894  34 
   1  11 -13 1116.91 213.492  17 
   1  11 -12 1508.13 315.506  17 
  -1  11  12 1825.47 304.391  34 
  -1 -11  12 1097.69 307.043  27 
  -1  11  12 1556.86 282.254  30 
  -1  11  12 1878.22 325.074  35 
  -1  11  12 1439.75 323.579  16 
  -1 -11  12 1244.82 358.391  16 
   1  11 -12 1644.41 366.125  29 
   1 -11 -12 1501.14 313.440  26 
   1  11 -11 333.878 270.939  17 
  -1 -11  11-46.0100 255.409  27 
  -1  11  11 108.146 224.118  35 
   1 -11 -11-33.4393 248.641  26 
   1  11 -11 0.50924 252.910  29 
  -1  11  11 166.087 222.044  34 
  -1  11  11 28.9031 263.981  16 
  -1  11  10 3461.52 489.538  16 
   1  11 -10 3371.08 526.338  29 
  -1  11  10 3417.41 468.014  35 
  -1 -11  10 2978.79 484.076   6 
  -1 -11  10 3710.57 557.912  27 
  -1  11  10 3719.03 482.414  34 
   1 -11 -10 3652.64 485.670  26 
  -1 -11   9 2279.62 484.990  27 
   1  11  -9 2223.15 457.428  29 
   1 -11  -9 2594.44 421.866  26 
  -1  11   9 2652.37 437.282  16 
  -1  11   9 2277.95 389.772  35 
  -1  11   9 2615.79 436.450  34 
  -1 -11   9 2352.18 469.193   6 
   1  11  -8-109.264 252.699  29 
  -1 -11   8-101.178 218.691  32 
  -1  11   8 88.3842 229.861  16 
   1  11  -8 59.1258 247.971  20 
  -1 -11   8 382.274 288.762  24 
   1 -11  -8 306.291 220.796  26 
  -1 -11   8-323.457 240.478   6 
  -1 -11   8-19.1115 281.615  27 
  -1  11   8 119.673 192.678  35 
   1  11  -8 84.2119 170.549  21 
   1  11  -8 252.266 221.736  36 
  -1  11   8 23.0187 196.924  34 
   1 -11  -8-162.949 223.463   1 
  -1  11   8 349.336 231.416  22 
   1 -11  -7 1829.88 367.983   1 
   1 -11  -7 1606.99 330.783  36 
   1  11  -7 1919.16 353.528  21 
  -1 -11   7 1645.78 394.427  24 
   1  11  -7 1554.54 315.501  36 
  -1  11   7 1843.53 367.711  22 
   1  11  -6 16012.4 834.717  37 
   1 -11  -6 16166.0 858.872  40 
   1 -11  -6 15893.7 846.196  36 
  -1  11   6 14781.5 863.990  22 
   1  11  -6 14940.9 851.445  21 
   1 -11  -6 14953.3 898.164   1 
  -1 -11   6 14494.0 951.723  24 
   1  11  -6 16522.5 841.128  36 
   1 -11  -5 8052.32 604.810  40 
  -1 -11   5 7464.25 656.131  24 
   1 -11  -5 9321.89 632.050  36 
   1  11  -5 8785.50 560.477  36 
   1 -11  -5 7717.34 645.088   1 
   1  11  -5 8757.16 576.903   2 
  -1  11   5 8057.79 630.112  22 
   1  11  -5 8118.33 600.534  21 
   1  11  -5 8704.26 598.222  37 
  -1 -11   4 454.901 150.560  40 
   1 -11  -4 213.547 144.556  24 
   1  11  -4 103.514 121.221   2 
  -1  11   4 106.883 188.629  22 
   1  11  -4 122.495 136.682  37 
   1  11  -4 251.793 178.118  21 
   1  11  -4 384.368 129.867  36 
   1 -11  -4 103.852 155.952  40 
   1 -11  -4 164.398 199.912   1 
  -1  11   4 166.913 199.625  37 
   1 -11  -4 29.0267 136.208  36 
  -1 -11   4 686.813 246.161  24 
  -1 -11   3 10347.8 639.520  24 
  -1  11   3 9699.36 667.035  22 
  -1 -11   3 11578.8 816.836  40 
   1 -11  -3 11032.9 573.117  24 
   1 -11  -3 9913.02 673.383  40 
  -1  11   3 10186.6 486.594  39 
   1  11  -3 10900.0 608.014  21 
   1 -11  -3 9880.99 648.904   1 
   1  11  -3 10798.8 531.575   2 
   1  11  -3 10450.3 601.953  37 
  -1  11   3 9606.34 688.593  37 
   1 -11  -3 10806.4 620.901  36 
   1 -11  -2 2285.90 364.155  40 
   1  11  -2 2153.70 234.860   2 
  -1  11   2 2264.10 337.378  21 
   1  11  -2 1995.11 285.218  37 
  -1 -11   2 2173.74 304.044  24 
  -1  11   2 2072.36 349.390  37 
   1 -11  -2 1941.01 255.865  24 
   1 -11  -2 1887.91 293.434   1 
  -1 -11   2 1900.62 367.844  40 
  -1  11   2 2319.72 277.549  39 
   1  11  -2 2146.15 293.988  21 
   1 -11  -1 382.868 148.158  24 
   1  11  -1 457.830 164.268  37 
  -1  11   1 381.115 189.161  21 
  -1  11   1 644.461 207.854  39 
  -1  11   1 253.900 171.120  37 
   1  11  -1 629.719 150.950   2 
  -1 -11   1 759.965 287.218  40 
   1 -11  -1 436.479 228.384  40 
  -1  11   1 507.987 167.269   2 
  -1 -11   1 415.555 175.577  24 
   1  11  -1 702.768 187.660  21 
  -1  11   0 414.746 164.065   2 
  -1  11   0 48.5407 166.766  39 
   1 -11   0 108.789 198.087  40 
  -1 -11   0 362.113 143.789   1 
   1 -11   0 192.085 137.245  24 
   1  11   0 457.704 198.272  37 
  -1 -11   0 232.311 162.118  24 
  -1  11   0 339.439 167.913  21 
   1  11   0 331.877 125.869   2 
  -1 -11   0 609.264 243.775  40 
   1  11   0 386.752 162.776  21 
  -1  11   0 420.894 179.363  37 
  -1 -11  -1 2482.72 393.774  40 
  -1  11  -1 2517.85 293.775   2 
  -1 -11  -1 2251.85 289.629   1 
   1  11   1 2625.82 244.663  23 
   1 -11   1 2263.56 363.358  40 
   1  11   1 2549.51 320.884  37 
  -1 -11  -1 2232.02 316.812  24 
   1 -11   1 2028.32 277.652  24 
  -1  11  -1 2515.75 313.460  21 
  -1  11  -1 2254.73 322.700  37 
   1  11   1 2438.58 308.964  21 
  -1  11  -2 415.487 168.628  21 
   1  11   2 462.436 185.699  21 
  -1  11  -2 525.848 165.689   2 
  -1 -11  -2 755.841 215.415   1 
   1  11   2 370.719 179.125  37 
  -1 -11  -2 1115.42 291.366  40 
   1 -11   2 335.593 170.629  24 
   1  11   2 398.173 115.554  23 
  -1 -11  -2 357.174 181.849  24 
  -1  11  -2 490.936 185.372  37 
   1 -11   2 355.898 204.149  40 
  -1  11  -3 12829.8 699.219  21 
  -1  11  -3 13264.3 711.509  37 
  -1 -11  -3 13352.5 764.080   1 
   1 -11   3 12444.1 717.109  24 
   1  11   3 12633.0 725.171  37 
  -1 -11  -3 12929.3 813.673  40 
   1 -11   3 13551.1 797.493  40 
  -1  11  -3 12180.5 664.896   2 
   1 -11   3 13200.6 667.525  23 
   1  11   3 12451.2 728.926  22 
  -1 -11  -3 13511.2 739.284  24 
  -1  11  -4 1352.46 267.002   2 
   1 -11   4 1284.95 290.734  23 
  -1 -11  -4 2456.20 376.840  40 
  -1  11  -4 1555.32 257.521  37 
   1 -11   4 2299.39 363.759  40 
  -1 -11  -4 2548.82 347.755  24 
  -1 -11  -4 1587.60 321.903   1 
  -1  11  -4 1464.06 282.415  21 
   1  11   4 2015.02 321.505  37 
   1  11   4 1676.09 302.795  22 
   1  11   5 6893.39 571.459  37 
  -1  11  -5 7077.14 590.765  36 
  -1 -11  -5 7477.39 623.166   1 
   1 -11   5 7039.02 616.854  23 
  -1  11  -5 7391.54 576.395  21 
  -1 -11  -5 6456.82 583.890  40 
   1  11   5 6680.38 576.880  22 
  -1  11  -6 1526.28 304.081  21 
   1  11   6 1574.61 322.474  22 
  -1  11  -6 1293.95 303.207  36 
  -1 -11  -6 1306.43 315.340   1 
   1 -11   6 1093.81 301.472  23 
  -1 -11  -7 1421.71 333.078   1 
  -1  11  -7 1077.65 318.045  36 
   1 -11   7 1008.65 317.779  23 
   1  11   7 1306.39 315.232  22 
  -1  11  -8 5099.74 635.164  20 
   1  11   8 5959.08 559.384  28 
   1 -11   8 5620.85 633.722  27 
   1  11   8 4393.45 507.277  35 
   1  11   8 6183.91 596.774  34 
  -1  11  -8 4833.95 604.815  39 
   1  11   8 3693.52 482.781  22 
   1  11   8 4215.15 524.154  16 
  -1 -11  -8 5646.24 577.670  29 
  -1 -11  -8 5505.79 583.384  26 
  -1  11  -8 5395.88 625.181  29 
   1 -11   8 3490.00 518.431  23 
  -1  11  -8 3835.77 529.817  36 
  -1 -11  -8 5517.78 587.789   1 
   1 -11   8 5118.11 598.969  35 
   1  11   9 2075.76 348.968  28 
  -1 -11  -9 1581.43 349.805  26 
  -1  11  -9 1898.35 450.003  17 
  -1 -11  -9 1651.30 338.919  29 
   1 -11   9 1531.64 387.283  35 
   1  11   9 2177.04 387.748  34 
  -1  11  -9 1587.44 389.925  20 
  -1  11  -9 1867.43 403.519  29 
   1  11   9 1826.61 369.829  16 
   1 -11   9 1805.28 409.595  27 
   1  11   9 1494.26 333.263  35 
   1 -11  10 1113.53 316.062  35 
   1  11  10 1455.41 298.225  28 
  -1  11 -10 1173.23 368.261  17 
  -1 -11 -10 1415.00 314.499  29 
  -1 -11 -10 886.259 293.069  26 
   1  11  10 1128.15 298.328  35 
  -1  11 -10 1662.15 391.425  29 
   1  11  10 1578.91 346.484  34 
  -1  11 -10 1386.90 343.987  20 
   1  11  10 1501.15 351.588  16 
   1 -11  10 1202.58 374.821  27 
  -1 -11 -11 4719.09 452.634  29 
   1  11  11 4565.10 415.063  30 
  -1 -11 -11 4613.00 491.400  26 
   1 -11  11 4736.34 506.858  35 
   1  11  11 4398.33 471.563  34 
  -1  11 -11 4214.98 512.400  29 
  -1  11 -11 4350.90 532.533  17 
   1  11  11 4487.82 465.036  35 
   1  11  11 4471.22 393.926  28 
   1 -11  11 4290.19 510.945  27 
  -1  11 -12-20.8418 206.740  29 
   1  11  12 109.927 172.715  34 
  -1 -11 -12 363.456 171.460  29 
  -1  11 -12-11.4258 200.999  17 
   1 -11  12 83.5270 167.986  27 
   1  11  12 70.8340 160.473  35 
  -1 -11 -12 383.753 208.667  26 
   1 -11  12 184.909 188.096  16 
   1 -11  12 172.303 162.010  35 
  -1 -12  13-5.48892 145.651  27 
  -1  12  13 10.7544 101.763  34 
   1  12 -13-47.8339 138.770  17 
  -1  12  13-40.9009 106.977  30 
   1 -12 -13-123.186 141.031  26 
  -1  12  13 58.8057 130.262  35 
  -1 -12  13-96.5784 181.941  16 
   1  12 -13 8.40867 152.417  29 
   1  12 -12 4356.46 453.205  17 
  -1 -12  12 3854.33 454.610  27 
  -1  12  12 4190.97 423.518  35 
  -1 -12  12 3879.88 479.692  16 
   1 -12 -12 4803.54 452.977  26 
   1  12 -12 4278.87 475.328  29 
  -1  12  12 4621.01 412.137  34 
  -1  12  12 4295.37 394.754  30 
  -1  12  11 403.011 214.186  30 
   1  12 -11 68.3299 264.464  29 
  -1  12  11 289.568 249.123  16 
   1  12 -11 112.966 273.281  17 
  -1 -12  11-18.9675 255.657  27 
   1 -12 -11 357.002 239.674  26 
  -1  12  11 395.818 238.328  35 
  -1  12  11 584.713 256.113  34 
  -1 -12  10 294.981 298.162   6 
  -1  12  10 274.055 246.805  35 
  -1  12  10 368.430 299.863  16 
  -1 -12  10 238.093 285.336  27 
  -1  12  10 539.260 277.641  34 
   1  12 -10 341.988 300.864  29 
   1 -12 -10 284.984 224.281  26 
  -1  12   9 5341.87 577.698  35 
  -1 -12   9 5440.53 674.343  27 
  -1  12   9 6389.17 564.488  28 
  -1  12   9 5854.54 608.824  34 
   1  12  -9 5217.40 613.518  20 
  -1  12   9 5131.16 587.607  16 
   1  12  -9 5755.35 667.737  29 
   1 -12  -9 5689.48 606.230  26 
  -1 -12   9 5445.94 642.872  32 
  -1 -12   9 5222.55 623.032   6 
   1  12  -8 65.0077 192.207  21 
  -1 -12   8-14.4604 234.398  32 
  -1 -12   8-163.191 312.464  27 
  -1  12   8 158.788 213.244  35 
   1  12  -8 179.842 237.762  29 
  -1  12   8 321.854 251.381  28 
   1 -12  -8 34.7143 242.120   1 
   1 -12  -8-55.1667 204.772  26 
  -1 -12   8 92.3565 248.473  24 
  -1 -12   8-64.8303 301.560   9 
  -1  12   8 136.943 212.636  34 
  -1 -12   8 34.3431 235.485   6 
  -1  12   8 20.5125 227.998  16 
   1  12  -8-17.5874 246.288  20 
  -1  12   8-84.9314 188.576  22 
   1 -12  -7 401.727 225.532   1 
  -1 -12   7 480.550 303.815  24 
  -1  12   7 585.960 247.675  22 
   1  12  -7 600.994 243.479  21 
   1  12  -7 366.601 204.718   2 
  -1  12   6 1264.25 312.290  22 
   1  12  -6 1343.44 286.536   2 
   1 -12  -6 1090.99 226.996  36 
   1  12  -6 1237.53 260.108  37 
   1 -12  -6 1581.18 326.080  40 
   1  12  -6 1283.76 293.060  21 
  -1 -12   6 1419.32 376.094  24 
   1 -12  -6 1387.32 338.083   1 
   1  12  -6 1331.71 268.146  36 
   1  12  -5 391.982 196.555  37 
   1  12  -5 175.423 185.274   2 
   1 -12  -5 136.338 146.875  36 
  -1 -12   5 198.425 221.071  24 
   1 -12  -5 211.919 220.391   1 
  -1  12   5 447.803 243.080  22 
   1 -12  -5 70.0310 179.141  40 
   1  12  -5 216.333 184.190  21 
   1  12  -5 150.480 144.945  36 
   1 -12  -4 346.219 195.693  40 
   1 -12  -4 25.2424 127.899  24 
   1  12  -4 43.9325 154.317  21 
   1 -12  -4 107.332 181.855   1 
   1  12  -4 87.7164 137.323   2 
  -1  12   4 60.9590 189.642  22 
  -1  12   4 79.6018 184.695  37 
   1  12  -4 46.5634 134.966  37 
  -1 -12   4 23.8187 198.427  24 
   1 -12  -4 50.2915 143.919  36 
  -1  12   3 34546.6 1290.81  37 
   1  12  -3 36209.4 1152.56  37 
   1  12  -3 37535.5 1014.17   2 
   1 -12  -3 34646.5 1269.05  40 
   1  12  -3 35376.3 1156.01  21 
   1 -12  -3 37666.0 1150.49  36 
   1 -12  -3 36265.7 1263.77   1 
  -1 -12   3 35642.6 1194.08  24 
  -1 -12   3 39867.6 1507.67  40 
   1 -12  -3 40548.9 1137.12  24 
  -1  12   3 36515.9 1248.16  22 
  -1 -12   2 2102.74 389.889  40 
  -1  12   2 1750.89 252.483  39 
  -1  12   2 1647.71 314.499  21 
  -1 -12   2 1799.61 303.035  24 
   1  12  -2 1813.69 289.640  21 
   1 -12  -2 1655.69 264.215  24 
   1 -12  -2 1824.16 336.910  40 
   1  12  -2 1963.04 243.030   2 
   1 -12  -2 1685.10 298.793   1 
   1  12  -2 1923.15 292.053  37 
  -1  12   2 1424.07 303.370  37 
  -1  12   1 4948.60 474.727  21 
  -1  12   1 4502.90 403.003   2 
   1 -12  -1 4973.93 511.901  40 
  -1 -12   1 4466.35 435.638  24 
  -1  12   1 4292.76 467.924  37 
   1 -12  -1 4633.07 389.465  24 
  -1 -12   1 5393.87 590.016  40 
   1  12  -1 4498.50 360.812   2 
  -1  12   1 4212.37 435.052  39 
   1  12  -1 4587.67 424.595  37 
   1  12  -1 5074.17 428.903  21 
  -1 -12   0 1237.28 310.963  40 
  -1  12   0 1179.32 272.744  21 
   1  12   0 1108.48 228.416  21 
   1  12   0 1348.20 271.279  37 
  -1  12   0 847.793 250.586  39 
   1  12   0 1050.84 193.434   2 
  -1  12   0 1323.64 228.780   2 
   1 -12   0 1017.83 217.194  24 
   1 -12   0 1194.11 287.325  40 
  -1  12   0 1359.73 277.190  37 
  -1 -12   0 1185.44 261.123  24 
  -1 -12   0 1117.40 215.081   1 
   1  12   1 25046.7 976.074  37 
   1 -12   1 24059.5 883.784  24 
  -1 -12  -1 24981.9 1155.15  40 
   1  12   1 26381.4 780.311  23 
  -1 -12  -1 23811.4 927.081   1 
  -1  12  -1 24074.7 1022.25  37 
   1  12   1 23990.4 941.604  21 
  -1 -12  -1 24406.6 974.789  24 
  -1  12  -1 25268.1 882.060   2 
  -1 -12  -1 28101.0 797.693  25 
   1 -12   1 24061.8 1103.90  40 
  -1  12  -1 24711.0 957.653  21 
  -1  12  -2 652.173 188.696   2 
   1  12   2 551.083 213.799  37 
  -1  12  -2 571.890 191.400  21 
  -1  12  -2 833.527 244.649  37 
   1 -12   2 521.977 187.794  24 
  -1 -12  -2 1243.17 331.756  40 
  -1 -12  -2 711.686 225.523  24 
   1  12   2 580.235 203.210  21 
  -1 -12  -2 808.466 225.184   1 
   1 -12   2 770.454 264.492  40 
  -1  12  -3 20090.0 924.400  37 
   1 -12   3 20205.2 1024.60  40 
  -1  12  -3 19722.0 870.510   2 
   1 -12   3 19887.1 912.926  24 
   1  12   3 19360.6 923.871  37 
  -1 -12  -3 21082.9 1042.87  40 
  -1  12  -3 19866.9 888.889  21 
  -1 -12  -3 21057.3 939.202  24 
   1  12   3 19845.8 917.359  22 
  -1 -12  -3 20420.0 947.092   1 
   1  12   4 76.8060 177.605  22 
  -1  12  -4 76.8461 172.620   2 
  -1 -12  -4 163.028 193.700  24 
   1  12   4 4.83564 156.934  37 
   1 -12   4 249.154 222.766  24 
  -1 -12  -4 85.1229 181.462  40 
  -1  12  -4 69.2627 143.499  21 
  -1 -12  -4 92.0532 167.324   1 
   1 -12   4 166.930 186.078  40 
   1  12   5 4788.62 512.322  22 
  -1 -12  -5 5644.31 557.181   1 
   1 -12   5 5180.11 547.234  23 
  -1  12  -5 5289.85 517.946   2 
  -1  12  -5 5816.56 535.740  21 
  -1 -12  -5 4700.49 515.231  40 
   1  12   5 4948.08 505.086  37 
   1  12   6 2018.95 362.637  22 
  -1 -12  -6 2338.16 381.241   1 
  -1  12  -6 2201.35 371.468  36 
  -1  12  -6 2492.91 385.388  21 
   1 -12   6 2055.16 392.773  23 
  -1  12  -6 2448.90 394.617   2 
  -1  12  -7-148.782 198.312  20 
  -1  12  -7 22.8672 200.876   2 
  -1  12  -7 582.871 295.854  39 
   1 -12   7 0.57364 207.195   9 
   1  12   7 166.358 212.957  34 
   1  12   7-52.9722 174.031  22 
  -1 -12  -7-136.350 202.642  29 
  -1  12  -7 194.836 295.290  29 
   1 -12   7-184.468 243.755  27 
   1  12   7-127.927 199.950  16 
   1  12   7 9.67536 166.389  35 
  -1  12  -7 49.4818 231.596  36 
   1  12   7-43.4576 193.249  28 
  -1 -12  -7 42.4313 185.701   1 
  -1 -12  -7-112.728 204.689  26 
  -1  12  -8 4294.64 579.121  29 
   1  12   8 4422.55 492.743  28 
   1 -12   8 4407.14 575.828  35 
  -1  12  -8 3742.11 564.489  20 
   1  12   8 4997.82 564.437  16 
   1 -12   8 3590.04 560.336  27 
  -1 -12  -8 4428.31 521.366  29 
   1 -12   8 4593.22 550.912  32 
   1 -12   8 3523.06 539.056   9 
  -1 -12  -8 4435.46 540.620  26 
   1  12   8 3477.33 464.111  35 
   1  12   8 4914.34 565.584  34 
  -1  12  -9 440.400 328.582  17 
   1  12   9 84.1256 198.919  28 
   1  12   9 163.517 222.674  35 
   1 -12   9 198.933 273.361  27 
  -1  12  -9 212.381 283.486  20 
  -1 -12  -9 221.973 205.676  29 
  -1 -12  -9 147.074 215.594  26 
   1  12   9 332.270 254.666  16 
   1 -12   9 98.5137 276.104  35 
   1  12   9 241.478 247.715  34 
  -1  12  -9 291.857 259.747  29 
  -1  12 -10 412.132 306.692  17 
  -1 -12 -10 528.994 255.879  26 
   1 -12  10 183.421 215.993  35 
   1  12  10 592.831 225.281  28 
   1  12  10 361.835 206.956  35 
  -1 -12 -10 494.546 216.763  29 
  -1  12 -10 649.421 295.868  20 
  -1  12 -10 463.470 308.370  29 
   1 -12  10 313.542 288.842  27 
   1  12  10 679.737 288.332  34 
   1  12  11 1195.12 281.363  35 
  -1 -12 -11 1800.06 358.189  26 
   1 -12  11 1064.00 310.551  27 
  -1  12 -11 1286.63 354.920  17 
  -1 -12 -11 1413.45 274.041  29 
   1  12  11 1713.24 270.821  28 
   1 -12  11 1285.87 300.547  35 
  -1  12 -11 1295.85 347.641  29 
   1  12  11 1482.58 311.989  34 
  -1  12 -12 196.803 198.475  29 
  -1  12 -12 150.690 194.192  17 
  -1 -12 -12 492.961 195.266  26 
   1 -12  12 220.798 176.006  27 
   1  12  12 211.513 158.372  34 
   1 -12  12 249.931 184.529  16 
   1 -12  12 160.420 138.002  35 
   1  12  12 156.862 149.701  35 
   1  13 -12 3249.89 411.486  29 
  -1 -13  12 3009.10 398.641  27 
   1  13 -12 3172.92 393.205  17 
  -1  13  12 3385.22 343.048  30 
   1 -13 -12 3680.89 393.956  26 
  -1  13  12 3092.35 358.390  35 
  -1  13  12 3558.20 362.511  34 
  -1 -13  12 2995.15 410.977  16 
  -1  13  11 3937.28 461.365  35 
   1  13 -11 4526.43 529.213  29 
   1  13 -11 3827.77 509.550  17 
   1 -13 -11 3905.36 466.953  26 
  -1  13  11 3907.93 423.895  30 
  -1  13  11 4085.15 446.696  34 
  -1 -13  11 3834.03 511.635  27 
  -1 -13  10 4229.08 554.701   6 
  -1 -13  10 5261.43 641.424  27 
  -1  13  10 4676.95 499.545  30 
   1 -13 -10 4966.78 539.031  26 
  -1  13  10 5678.43 582.007  34 
  -1  13  10 5512.65 567.452  16 
   1  13 -10 5096.80 617.085  29 
  -1  13  10 5960.16 573.691  35 
  -1 -13   9 142.996 256.160  32 
  -1 -13   9 145.221 272.393   6 
  -1  13   9 239.744 268.172  34 
  -1  13   9 2.08673 229.335  35 
  -1 -13   9-195.059 384.576  27 
  -1  13   9 38.9023 204.797  28 
   1 -13  -9-27.4182 217.044  26 
   1  13  -9-194.039 305.156  20 
   1  13  -9 366.302 326.534  29 
  -1  13   9 80.5387 261.098  16 
  -1  13   9 40.3595 201.703  30 
   1  13  -8 2085.99 393.059  21 
   1  13  -8 1737.77 430.799  20 
  -1 -13   8 1725.78 408.462  32 
  -1  13   8 2577.64 395.135  28 
  -1  13   8 1742.65 380.842  34 
  -1 -13   8 2003.62 398.040   6 
  -1  13   8 1782.02 395.626  16 
  -1 -13   8 1713.62 432.104  27 
   1  13  -8 1924.48 434.228  29 
  -1  13   8 2058.29 376.221  30 
  -1  13   8 1985.20 375.803  35 
   1 -13  -8 2145.20 399.776  26 
  -1 -13   8 1812.37 402.083   9 
  -1  13   7 798.593 275.123  22 
  -1 -13   7 529.007 279.317   6 
   1  13  -7 1102.39 298.699  21 
  -1 -13   7 1351.22 363.447   9 
  -1  13   7 1613.40 321.555  28 
  -1  13   7 1128.21 333.441  16 
  -1  13   7 854.636 281.014  30 
  -1 -13   7 636.185 260.101  32 
  -1  13   7 1027.21 313.957  35 
   1 -13  -7 1127.56 305.197  26 
   1 -13  -7 1089.35 312.488   1 
  -1 -13   7 928.400 350.537  24 
  -1 -13   7 1023.10 330.789  27 
  -1  13   7 1088.08 326.356  34 
   1  13  -6 2051.57 339.724  37 
   1 -13  -6 2451.78 384.101  40 
  -1  13   6 2677.68 403.373  22 
   1  13  -6 3087.78 415.065   2 
   1 -13  -6 2347.65 399.710   1 
   1  13  -6 2402.61 407.396  21 
  -1 -13   6 2545.95 454.210  24 
   1  13  -5 12278.9 757.560  37 
   1  13  -5 12803.2 794.748  21 
  -1 -13   5 11522.9 834.039  24 
   1 -13  -5 11365.2 769.923  40 
   1  13  -5 13695.1 758.178   2 
  -1  13   5 12111.0 822.741  37 
   1 -13  -5 12248.1 826.683   1 
  -1  13   5 11544.9 804.949  22 
   1 -13  -4 14608.4 848.027  40 
  -1  13   4 14052.1 871.578  22 
   1  13  -4 14672.3 831.791  21 
   1  13  -4 15291.3 812.877  37 
   1  13  -4 17629.9 789.749   2 
   1 -13  -4 15774.3 907.059   1 
   1 -13  -4 16105.4 790.835  36 
  -1 -13   4 14537.0 857.455  24 
  -1  13   4 14218.6 884.961  37 
  -1  13   3 720.324 261.402  37 
   1 -13  -3 1181.80 248.366  24 
   1  13  -3 906.600 245.881  21 
  -1 -13   3 842.446 247.895  24 
   1  13  -3 706.013 211.989  37 
   1  13  -3 1012.98 219.475   2 
  -1 -13   3 984.419 268.576  40 
   1 -13  -3 818.069 266.994  40 
  -1  13   3 861.440 261.505  22 
   1 -13  -3 435.209 153.803  36 
   1 -13  -3 896.277 256.090   1 
  -1  13   2 692.514 246.920  37 
   1  13  -2 923.492 250.733  21 
  -1  13   2 705.918 227.523  21 
  -1 -13   2 930.613 255.948  24 
  -1  13   2 741.348 187.587  39 
   1 -13  -2 1007.68 253.410   1 
   1  13  -2 811.365 229.523  37 
   1 -13  -2 662.376 180.692  24 
   1 -13  -2 791.832 269.393  40 
   1  13  -2 865.949 196.344   2 
   1 -13  -2 678.077 170.019  36 
  -1 -13   2 893.797 266.887  40 
  -1  13   1-0.33378 142.881   2 
   1 -13  -1 4.38780 218.246  40 
  -1 -13   1-92.8718 183.596  24 
  -1  13   1 21.7053 166.971  21 
   1 -13  -1 82.9323 131.446  24 
  -1  13   1-222.778 220.445  37 
   1  13  -1 0.71351 147.981  21 
   1  13  -1 135.641 158.964  37 
   1 -13  -1 17.5065 149.649   1 
   1  13  -1-75.5166 121.006   2 
  -1  13   1-64.7516 150.185  39 
  -1 -13   1-139.249 265.231  40 
  -1 -13   0 3280.99 470.684  40 
   1  13   0 3386.06 397.168  37 
  -1  13   0 2360.72 374.026  37 
   1 -13   0 3177.55 450.733  40 
  -1  13   0 2538.35 332.413   2 
  -1  13   0 2777.00 406.052  39 
   1 -13   0 2626.23 333.082  24 
  -1 -13   0 2949.68 374.733  24 
  -1  13   0 2934.39 381.969  21 
   1  13   0 2630.23 344.224  21 
  -1 -13   0 2230.85 303.001   1 
  -1 -13  -1 3180.56 369.143   1 
  -1  13  -1 2836.73 385.036  21 
  -1 -13  -1 2891.36 433.235  40 
  -1 -13  -1 3018.68 376.335  24 
   1 -13   1 3172.14 441.891  40 
   1 -13   1 2892.86 353.081  24 
  -1  13  -1 3427.53 418.135  37 
   1  13   1 2810.68 359.602  21 
  -1  13  -1 3138.35 346.396   2 
  -1  13  -1 2791.44 461.889  39 
   1  13   1 2976.57 393.096  37 
   1 -13   2 29702.6 1267.54  40 
  -1  13  -2 28692.7 1144.88  37 
  -1 -13  -2 29256.1 1256.56  40 
   1 -13   2 28685.5 1055.28  24 
   1  13   2 29837.4 1134.18  21 
  -1  13  -2 28318.0 1083.52  21 
  -1  13  -2 30061.0 1045.58   2 
  -1 -13  -2 30119.7 1139.73  24 
   1  13   2 28689.5 1134.04  37 
  -1 -13  -2 30984.7 1146.84   1 
  -1  13  -3 464.201 200.910  21 
  -1 -13  -3 710.977 230.389   1 
  -1  13  -3 552.320 205.664   2 
  -1 -13  -3 826.657 292.491  40 
  -1  13  -3 524.184 208.776  37 
   1 -13   3 439.925 220.282  24 
   1 -13   3 811.509 263.958  40 
  -1 -13  -3 577.974 227.303  24 
   1  13   3 618.311 233.485  22 
   1  13   3 259.516 170.308  37 
   1  13   4 12423.0 783.497  22 
   1 -13   4 15395.7 893.878  40 
  -1 -13  -4 12393.7 831.742  40 
  -1  13  -4 12450.5 761.628   2 
  -1 -13  -4 12235.2 784.626   1 
  -1 -13  -4 13816.4 808.834  24 
  -1  13  -4 12611.3 784.830  21 
   1 -13   4 11427.5 797.528  24 
   1  13   4 11839.3 781.973  37 
   1  13   5 601.979 227.733  22 
  -1 -13  -5 504.286 227.937  40 
  -1  13  -5 600.178 246.560   2 
   1 -13   5 1144.51 329.766  24 
  -1 -13  -5 762.160 269.866   1 
  -1  13  -5 609.746 232.436  21 
   1  13   5 536.818 230.210  37 
   1 -13   6 10360.3 852.464  24 
  -1 -13  -6 10681.0 777.195   1 
  -1  13  -6 10909.8 811.096   2 
   1  13   6 10208.1 758.912  22 
   1 -13   7 8068.03 708.589  32 
   1 -13   7 7773.37 726.440   9 
   1 -13   7 7637.96 753.900  27 
   1  13   7 6366.46 618.258  22 
  -1  13  -7 7875.72 807.265  20 
   1  13   7 8430.56 666.416  28 
  -1  13  -7 7721.21 792.790  39 
   1  13   7 6079.99 566.504  35 
  -1  13  -7 8780.16 756.476   2 
  -1 -13  -7 8413.83 724.478  26 
  -1 -13  -7 8450.70 718.941   1 
  -1  13  -7 8996.03 796.835  29 
  -1 -13  -7 6044.07 584.147  29 
   1 -13   7 7837.51 766.750  24 
   1  13   7 9037.82 730.570  34 
  -1 -13  -8 5151.80 592.776  26 
   1  13   8 6280.98 577.663  28 
   1  13   8 6073.04 607.907  34 
   1 -13   8 5323.28 625.578  27 
   1 -13   8 5994.59 651.310  35 
  -1  13  -8 5296.42 652.085  20 
   1 -13   8 5069.11 598.745   9 
   1 -13   8 5865.10 609.082  32 
  -1 -13  -8 5499.47 563.325  29 
  -1  13  -8 5490.51 644.479  29 
   1  13   8 5047.51 545.161  35 
   1  13   9 2620.15 382.206  28 
   1 -13   9 2537.01 423.416  35 
   1  13   9 2314.79 379.505  35 
  -1  13  -9 2794.20 530.209  17 
  -1 -13  -9 2638.64 437.379  26 
  -1  13  -9 2381.87 471.572  29 
   1 -13   9 2838.12 477.312  27 
  -1 -13  -9 2788.45 412.818  29 
   1  13   9 2075.93 383.258  34 
  -1  13  -9 2669.21 466.756  20 
   1 -13  10 1411.53 330.117  35 
  -1 -13 -10 2120.94 394.802  26 
   1  13  10 1901.08 367.644  34 
   1  13  10 2119.39 333.717  28 
  -1  13 -10 1887.30 402.993  29 
  -1  13 -10 1951.92 398.760  20 
   1 -13  10 1315.86 357.435  27 
  -1  13 -10 1510.48 412.597  17 
   1  13  10 2121.50 352.735  35 
  -1 -13 -10 1790.69 322.584  29 
  -1 -13 -11 1049.40 231.469  29 
  -1  13 -11 810.318 245.139  20 
  -1  13 -11 920.996 301.208  17 
   1 -13  11 1257.32 321.948  27 
   1  13  11 1002.66 249.805  35 
   1 -13  11 944.737 241.170  35 
   1  13  11 1225.72 283.691  34 
  -1  13 -11 753.314 276.066  29 
  -1 -13 -11 1204.38 291.414  26 
   1  13  11 1146.19 219.993  28 
  -1  13 -12 1554.62 268.264  29 
   1 -13  12 1535.86 211.913  35 
   1  13  12 1622.24 240.225  35 
  -1  13 -12 1698.92 282.865  17 
   1 -13  12 1549.67 251.344  16 
   1  13  12 2006.23 261.341  34 
  -1 -13 -12 2003.65 272.012  26 
   1 -13  12 1561.98 258.412  27 
   1  14 -12 6833.92 508.885  17 
  -1 -14  12 6373.47 514.140  27 
  -1 -14  12 6138.89 520.148  16 
   1 -14 -12 7469.72 506.820  26 
  -1  14  12 7018.52 474.160  35 
  -1  14  12 7180.67 465.173  34 
   1  14 -12 6698.58 525.881  29 
  -1  14  12 6627.69 418.455  30 
  -1  14  11 12514.0 714.247  35 
   1 -14 -11 13583.5 775.612  26 
   1  14 -11 13058.0 820.333  17 
  -1 -14  11 12705.9 834.150  27 
  -1  14  11 13520.0 742.301  34 
   1  14 -11 13831.0 830.416  29 
  -1  14  11 13206.8 703.929  30 
  -1  14  10 87.2543 229.933  35 
  -1  14  10 10.1240 257.738  34 
   1  14 -10-144.102 277.782  29 
  -1  14  10-65.1628 184.172  30 
  -1  14  10 164.558 213.095  28 
   1 -14 -10-80.1261 240.535  26 
  -1 -14  10 465.789 321.699  27 
  -1 -14  10 136.245 268.729   6 
   1  14 -10-17.4686 224.948  20 
  -1  14   9 405.808 237.906  28 
  -1 -14   9 341.007 276.516  32 
  -1 -14   9-28.0830 363.172  27 
   1  14  -9-9.90902 260.510  20 
  -1  14   9 292.593 261.603  35 
  -1 -14   9-12.8136 292.677   6 
   1  14  -9 402.718 325.371  29 
  -1  14   9 760.494 302.017  34 
  -1  14   9 272.637 211.553  30 
   1 -14  -9 245.378 231.262  26 
  -1  14   8 6910.19 642.078  35 
   1 -14  -8 7161.73 684.573  26 
  -1  14   8 8110.11 660.922  28 
  -1 -14   8 6513.67 715.582   9 
  -1 -14   8 6864.34 698.192  32 
  -1 -14   8 6825.20 742.007  27 
   1  14  -8 6906.44 749.842  20 
  -1  14   8 7547.88 695.167  34 
   1  14  -8 7123.38 736.840  29 
  -1  14   8 7090.90 642.469  30 
  -1 -14   8 6827.62 679.756   6 
   1 -14  -7 201.215 227.960   1 
  -1  14   7 211.751 259.477  28 
  -1  14   7 356.344 225.862  35 
  -1 -14   7-162.310 266.377  24 
  -1 -14   7-65.3136 251.748   9 
  -1  14   7 248.055 224.294  22 
   1 -14  -7 252.550 237.223  26 
  -1 -14   7-54.0641 213.004   6 
  -1 -14   7 261.288 262.241  27 
  -1 -14   7-17.2529 214.671  32 
  -1  14   7 306.477 243.953  34 
   1  14  -7 38.3761 165.561  21 
  -1  14   7-21.4255 159.416  30 
   1  14  -6 6623.62 642.135  21 
  -1  14   6 7156.30 649.590  22 
  -1 -14   6 6090.71 652.460  24 
   1 -14  -6 6785.48 650.267   1 
   1 -14  -6 6824.80 614.041  40 
   1 -14  -5 70836.1 1981.68   1 
  -1  14   5 67133.3 1956.69  37 
   1  14  -5 70657.8 1847.61  37 
   1  14  -5 69033.5 1885.36  21 
  -1  14   5 66908.7 1887.42  22 
   1 -14  -5 68489.0 1885.86  40 
  -1 -14   5 66540.7 1978.96  24 
  -1 -14   4 229.027 223.718  24 
   1 -14  -4 355.285 249.238  40 
   1 -14  -4 88.3738 199.646   1 
   1  14  -4 233.896 139.539   2 
   1  14  -4 270.888 194.050  21 
   1  14  -4 186.652 193.467  37 
  -1  14   4 249.257 253.984  22 
  -1  14   4 315.548 227.464  37 
   1 -14  -3 4284.63 494.826  40 
   1  14  -3 4816.80 476.898  21 
   1  14  -3 4152.12 389.563   2 
  -1 -14   3 5247.41 597.439  40 
   1 -14  -3 4302.33 442.293  24 
  -1  14   3 3797.62 481.272  22 
   1  14  -3 4131.93 446.444  37 
  -1  14   3 4100.81 503.854  37 
   1 -14  -3 4036.57 481.698   1 
  -1 -14   3 4196.07 473.429  24 
  -1  14   2 35.7675 129.074  39 
   1  14  -2 107.645 171.979  21 
  -1  14   2-9.69577 235.456  21 
   1  14  -2 285.287 196.631  37 
   1 -14  -2 194.558 166.302   1 
  -1 -14   2 8.54075 259.977  40 
  -1  14   2 92.6953 181.645  37 
  -1 -14   2-6.47808 189.763  24 
   1 -14  -2 142.948 154.556  24 
   1  14  -2 190.092 138.458   2 
   1 -14  -2 268.902 210.435  40 
  -1  14   1 2399.44 387.425  21 
  -1  14   1 2297.75 383.240  37 
   1  14  -1 3521.58 353.988   2 
   1  14  -1 2438.02 350.296  21 
   1  14  -1 2555.25 372.364  37 
   1 -14  -1 2366.34 333.468  24 
  -1 -14   1 2935.76 454.886  40 
   1 -14  -1 2745.71 425.408  40 
  -1 -14   1 3058.70 388.880  24 
   1 -14  -1 2681.96 370.063   1 
  -1  14   1 2469.32 352.401  39 
  -1  14   1 2844.01 361.670   2 
   1 -14   0-254.803 250.330  40 
   1 -14   0-42.0972 155.410  24 
  -1  14   0 190.465 166.854  21 
   1  14   0 108.781 159.076  21 
  -1  14   0-96.6890 229.954  37 
  -1  14   0-79.3503 145.400   2 
  -1  14   0 57.0243 183.657  39 
  -1 -14   0 193.958 177.052  24 
  -1 -14   0-217.854 288.808  40 
  -1 -14   0 87.9942 148.870   1 
   1  14   0 100.631 181.886  37 
  -1 -14  -1 20948.3 1090.34  40 
   1 -14   1 19766.9 886.859  24 
  -1  14  -1 18913.3 1086.55  39 
   1  14   1 20394.6 946.274  21 
  -1  14  -1 20623.4 874.904   2 
  -1 -14  -1 20820.1 927.868   1 
   1 -14   1 20396.4 1080.31  40 
  -1  14  -1 21004.4 978.508  21 
  -1 -14  -1 21156.3 944.718  24 
   1  14   1 19618.5 972.610  37 
  -1  14  -1 19841.3 1010.55  37 
   1  14   2 309.883 189.364  21 
  -1 -14  -2 542.698 296.131  40 
  -1  14  -2-14.1150 183.504  21 
   1  14   2-102.084 209.952  37 
  -1 -14  -2 171.438 171.532   1 
  -1  14  -2 204.535 173.629   2 
   1 -14   2-15.5637 166.845  24 
  -1 -14  -2 305.362 218.717  24 
  -1  14  -2 196.613 192.543  37 
   1 -14   2 322.990 249.300  40 
   1  14   3 439.934 237.483  22 
   1 -14   3 313.261 187.929  24 
  -1 -14  -3 601.297 235.516   1 
  -1  14  -3 779.654 240.550  37 
  -1 -14  -3 603.975 241.064  24 
  -1  14  -3 596.383 227.769   2 
  -1 -14  -3 1151.99 326.917  40 
   1 -14   3 880.857 307.520  40 
  -1  14  -3 532.149 220.907  21 
   1  14   3 467.674 203.490  37 
   1 -14   4 1065.55 295.684  24 
   1 -14   4 1294.28 312.634  40 
   1  14   4 1274.60 311.672  22 
  -1  14  -4 1239.09 293.142  21 
  -1 -14  -4 1345.30 317.082  24 
   1  14   4 1323.20 308.085  37 
  -1  14  -4 1036.80 273.858   2 
  -1 -14  -4 1285.13 302.098   1 
  -1 -14  -4 1174.02 303.068  40 
  -1 -14  -5 1560.19 322.762  40 
  -1  14  -5 1185.46 291.882  21 
   1 -14   5 1436.39 360.314  24 
   1  14   5 1323.40 300.627  37 
  -1 -14  -5 1165.48 281.741   1 
  -1  14  -5 1704.58 366.051   2 
   1  14   5 1478.15 328.139  22 
  -1 -14  -6 9.89776 184.491   1 
   1 -14   6 333.064 268.443  24 
  -1  14  -6 8.38774 226.727   2 
  -1 -14  -6-300.175 237.764  29 
   1  14   6 130.587 197.780  28 
  -1 -14  -6 148.300 241.256  26 
   1 -14   6 280.729 220.169  32 
   1  14   6 253.123 239.845  22 
   1  14   6-49.2080 211.895  34 
   1  14   6 560.810 250.895  35 
  -1  14  -6 337.018 329.342  39 
   1 -14   6-469.278 355.096  27 
   1 -14   6 353.052 266.754   9 
   1 -14   7 38378.7 1530.15   9 
   1  14   7 40510.7 1444.80  28 
   1  14   7 37036.5 1439.76  22 
  -1  14  -7 38940.2 1704.58  20 
   1  14   7 39630.7 1483.45  34 
  -1 -14  -7 39078.2 1487.29  29 
   1 -14   7 37053.6 1543.29  27 
   1  14   7 38948.1 1455.58  35 
  -1 -14  -7 39290.1 1538.47  26 
  -1  14  -7 34164.8 1629.38  39 
  -1  14  -7 42505.3 1639.14   2 
  -1 -14  -7 37416.7 1478.70   1 
   1 -14   7 36474.4 1611.65  24 
   1 -14   7 38843.5 1514.77  32 
  -1  14  -7 41158.0 1649.47  29 
   1 -14   8 9469.64 764.916  32 
   1 -14   8 9346.26 763.464  35 
   1  14   8 9094.17 721.897  34 
   1 -14   8 9598.31 828.235  27 
  -1 -14  -8 9492.59 714.676  29 
   1  14   8 10341.2 732.261  28 
  -1  14  -8 9309.57 827.796  20 
  -1  14  -8 9307.60 821.386  29 
  -1 -14  -8 9663.00 768.508  26 
   1  14   8 9291.43 709.797  35 
   1 -14   8 9120.05 823.298   9 
  -1  14  -9 8705.79 762.493  29 
   1  14   9 9720.26 677.758  28 
   1 -14   9 8614.26 772.855  27 
   1 -14   9 9530.91 740.784  35 
  -1  14  -9 9815.14 809.425  20 
  -1 -14  -9 9433.80 727.310  26 
   1  14   9 9201.16 674.491  35 
  -1 -14  -9 10280.1 710.343  29 
  -1  14  -9 9428.91 836.171  17 
   1  14   9 8858.11 691.771  34 
   1 -14  10-152.102 264.843  27 
   1 -14  10 284.451 198.497  35 
  -1  14 -10 168.738 268.986  29 
  -1 -14 -10 311.971 249.785  26 
   1  14  10 315.678 213.061  28 
   1  14  10 279.525 245.935  34 
  -1  14 -10 169.361 297.170  17 
  -1  14 -10 413.663 271.242  20 
   1  14  10 270.923 204.234  35 
  -1 -14 -10 37.0421 183.837  29 
   1  14  11 40.5265 158.955  35 
  -1  14 -11 55.1227 236.911  17 
   1  14  11 112.521 139.782  28 
   1 -14  11 129.585 194.245  27 
   1  14  11 138.382 183.816  34 
  -1 -14 -11 148.191 206.251  26 
  -1  14 -11 11.7037 214.140  29 
   1 -14  11 36.1176 142.471  35 
  -1  14 -11-89.4326 191.597  20 
   1  14  12 2073.39 250.532  34 
   1 -14  12 1705.86 243.026  27 
  -1 -14 -12 1907.51 218.217   7 
  -1 -14 -12 2356.53 270.629  26 
   1  14  12 1971.79 225.005  35 
  -1  14 -12 2128.02 280.207  29 
  -1  14 -12 1664.16 262.087  17 
   1 -14  12 1693.92 243.064  16 
   1 -15 -12 24010.2 715.547  32 
  -1 -15  12 20170.0 847.744  16 
   1  15 -12 23269.4 856.635  29 
   1  15 -12 22786.3 833.458  17 
  -1  15  12 22745.1 756.650  34 
  -1  15  12 22050.6 672.668  30 
  -1 -15  12 22528.8 875.398  27 
   1 -15 -12 25026.4 831.578  26 
  -1  15  11-26.0453 195.599  35 
  -1  15  11 12.7246 160.500  30 
  -1 -15  11 231.266 283.987  27 
   1 -15 -11 79.4482 202.739  26 
   1  15 -11 383.924 271.086  17 
   1  15 -11 277.056 282.028  29 
  -1  15  11 290.374 203.622  34 
   1 -15 -10 11242.0 762.050  26 
  -1  15  10 11874.9 678.280  28 
   1  15 -10 11430.9 849.347  29 
   1  15 -10 12490.1 804.923  20 
  -1 -15  10 10894.9 851.574  27 
  -1 -15  10 9484.60 719.640   6 
  -1  15  10 11337.1 691.571  30 
  -1  15  10 12048.0 769.771  34 
  -1  15  10 11199.8 718.573  35 
  -1  15   9 2538.62 389.320  28 
   1  15  -9 1774.20 409.458  20 
   1 -15  -9 2672.59 425.880  26 
  -1 -15   9 2442.94 491.154  27 
   1  15  -9 2600.77 496.896  29 
  -1  15   9 2486.51 395.070  30 
  -1 -15   9 2071.43 433.662  32 
  -1 -15   9 2112.48 434.694   6 
  -1  15   9 2716.62 446.355  34 
  -1  15   9 2338.46 392.971  35 
  -1 -15   8 1107.56 392.355   9 
   1  15  -8 1891.62 438.679  20 
  -1  15   8 1444.75 344.216  35 
  -1  15   8 1642.83 366.070  28 
   1 -15  -8 1686.24 366.020  26 
  -1 -15   8 1760.59 406.969  32 
  -1  15   8 1934.01 404.909  34 
  -1 -15   8 1233.57 377.898   6 
   1  15  -8 1925.60 444.601  29 
  -1 -15   8 1387.05 406.240  27 
  -1  15   8 1735.97 363.800  30 
  -1 -15   7 6053.43 710.297  27 
   1  15  -7 6112.83 657.496  21 
  -1  15   7 6151.87 588.493  30 
  -1  15   7 5678.04 637.534  34 
  -1 -15   7 5508.99 691.181  24 
   1 -15  -7 6020.06 629.835   1 
   1 -15  -7 5988.93 611.385  26 
  -1 -15   7 5896.69 648.950  32 
  -1  15   7 6651.68 643.806  28 
  -1  15   7 5783.35 593.691  35 
  -1 -15   7 6550.70 651.167   6 
  -1 -15   7 5696.76 649.239   9 
  -1  15   7 6798.05 644.501  22 
  -1 -15   6 9642.04 798.997  32 
  -1  15   6 10107.5 750.773  30 
  -1  15   6 11219.4 785.595  28 
  -1  15   6 10827.2 820.151  34 
  -1  15   6 7544.94 673.145  35 
   1 -15  -6 10958.3 790.563  40 
  -1 -15   6 11064.9 793.240   6 
   1  15  -6 11527.2 827.424  21 
  -1 -15   6 11696.9 905.894  27 
   1 -15  -6 7632.19 678.897  26 
   1 -15  -6 11822.2 847.027   1 
  -1 -15   6 10349.3 866.843  24 
  -1  15   6 11201.8 816.931  22 
  -1 -15   6 11012.8 839.890   9 
   1 -15  -5 1593.22 368.016   1 
   1 -15  -5 1278.86 335.609  40 
  -1 -15   5 1395.03 362.206  24 
  -1  15   5 1343.75 339.562  22 
   1  15  -5 1113.62 305.907  21 
   1  15  -5 1054.82 269.198  37 
  -1  15   4 109541. 2414.29  22 
  -1  15   4 106292. 2434.76  37 
   1  15  -4 108580. 2314.17  37 
   1  15  -4 106055. 2299.26  21 
   1 -15  -4 107575. 2445.34   1 
   1 -15  -4 103556. 2320.45  40 
  -1 -15   4 101940. 2390.81  24 
  -1  15   3 9319.44 728.993  37 
   1  15  -3 10100.6 712.569  21 
  -1 -15   3 11302.2 854.807  40 
   1  15  -3 8806.04 683.297  37 
   1  15  -3 11313.4 649.918   2 
  -1 -15   3 9983.29 736.271  24 
  -1  15   3 10395.4 745.950  22 
   1 -15  -3 10127.0 733.745  40 
   1 -15  -3 9809.15 736.177   1 
  -1 -15   2 8200.43 739.744  40 
   1 -15  -2 8040.06 593.146  24 
   1  15  -2 7421.16 601.598  37 
  -1  15   2 6479.95 621.720  37 
   1  15  -2 8452.38 555.421   2 
   1  15  -2 7503.87 600.365  21 
   1 -15  -2 7543.25 624.069   1 
  -1  15   2 6189.42 597.296  21 
   1 -15  -2 7487.16 652.844  40 
  -1 -15   2 7084.04 611.976  24 
  -1 -15   1 614.811 271.276  24 
  -1  15   1 691.662 237.341  21 
   1  15  -1 744.965 233.678  37 
   1  15  -1 932.673 260.269  21 
  -1 -15   1 660.111 202.420   1 
  -1  15   1 480.974 202.975  39 
   1  15  -1 855.378 227.078   2 
  -1 -15   1 878.506 257.544  40 
   1 -15  -1 844.683 256.735   1 
   1 -15  -1 672.437 223.435  24 
   1 -15  -1 661.334 245.209  40 
  -1  15   1 725.330 278.381  37 
   1  15   0 59389.4 1660.88  37 
   1 -15   0 62740.2 1542.93  24 
   1 -15   0 60347.2 1874.95  40 
  -1 -15   0 60043.0 1620.88  24 
   1  15   0 61577.8 1664.12  21 
  -1 -15   0 62825.2 1947.81  40 
  -1  15   0 61313.9 1567.88   2 
  -1  15   0 55540.1 1726.26  39 
  -1 -15   0 64421.9 1604.94   1 
  -1  15   0 56321.9 1737.95  37 
  -1  15   0 61548.4 1746.92  21 
   1  15   1 162.414 183.389  37 
  -1 -15  -1 275.317 158.350   1 
  -1  15  -1 268.341 202.607  37 
  -1 -15  -1 921.434 326.740  40 
  -1  15  -1 363.510 191.549   2 
  -1  15  -1 418.230 225.805  21 
   1 -15   1 358.763 178.795  24 
  -1  15  -1 306.150 234.486  39 
   1  15   1 361.269 203.121  21 
   1 -15   1 202.287 212.306  40 
  -1 -15  -1 219.075 201.286  24 
  -1  15  -2 95.0837 192.282  21 
  -1  15  -2 34.3447 173.202  37 
  -1  15  -2 99.6175 204.991  39 
  -1 -15  -2 326.216 253.126  40 
  -1  15  -2 222.365 183.668   2 
   1  15   2-10.6507 176.066  21 
   1 -15   2 306.108 227.680  40 
   1 -15   2 288.776 214.657  24 
  -1 -15  -2 293.319 186.838   1 
  -1 -15  -2 135.918 200.678  24 
   1  15   2-31.5738 187.529  37 
  -1  15  -3 116.276 166.325   2 
  -1  15  -3 252.963 176.445  37 
  -1 -15  -3 71.5060 181.033   1 
  -1  15  -3 14.6013 175.820  21 
   1 -15   3 307.049 202.647  40 
  -1 -15  -3 55.9160 192.660  24 
   1 -15   3-32.8632 198.915  24 
  -1  15  -3 271.778 280.674  39 
  -1 -15  -3 309.669 258.401  40 
   1  15   3 17.5660 182.909  22 
   1  15   3-78.7758 209.216  37 
  -1 -15  -4 8983.43 701.536   1 
   1 -15   4 8064.08 716.418  24 
  -1 -15  -4 9500.75 745.495  24 
  -1  15  -4 7629.25 800.620  39 
   1  15   4 8373.80 702.865  22 
  -1  15  -4 9014.33 680.126   2 
  -1  15  -4 8415.08 706.107  21 
  -1 -15  -4 8299.57 710.752  40 
   1  15   4 7984.55 669.686  37 
   1 -15   5 766.144 309.670  24 
  -1  15  -5 1303.22 330.175  21 
   1  15   5 989.843 294.225  37 
  -1  15  -5 1861.09 490.490  39 
  -1  15  -5 1469.26 338.059   2 
   1  15   5 1477.63 335.663  22 
  -1 -15  -5 1504.99 345.292   1 
  -1 -15  -5 1263.97 319.337  40 
   1  15   6 41478.3 1487.29  35 
   1 -15   6 43298.5 1580.75  32 
  -1 -15  -6 41749.5 1542.76   1 
  -1  15  -6 31592.8 1383.17   2 
   1  15   6 45203.2 1525.93  28 
   1 -15   6 39207.2 1626.97  24 
  -1  15  -6 35815.7 1706.61  39 
   1 -15   6 40304.6 1578.20  27 
  -1 -15  -6 42787.1 1637.08  26 
   1  15   6 43359.8 1576.95  34 
   1 -15   6 41981.7 1604.28   9 
  -1  15  -6 47607.8 1760.29  31 
   1  15   6 29832.2 1316.68  22 
   1 -15   7 728.288 322.681   9 
  -1 -15  -7 1037.01 344.795  29 
   1  15   7 619.773 265.728  35 
   1 -15   7 505.365 336.527  27 
   1  15   7 629.305 300.549  28 
  -1  15  -7 1176.31 401.860  29 
   1 -15   7 695.400 313.172  32 
  -1 -15  -7 709.765 353.747  26 
  -1  15  -7 425.988 349.746  20 
   1  15   7 373.916 254.617  34 
  -1  15  -8 54499.5 1870.05  29 
   1 -15   8 58188.2 1828.36  32 
   1  15   8 55392.9 1627.86  28 
   1  15   8 56437.4 1657.51  35 
   1 -15   8 57056.5 1823.54  35 
  -1 -15  -8 54730.0 1795.58  26 
   1 -15   8 53566.0 1830.46  27 
   1 -15   8 51313.8 1815.64   9 
  -1  15  -8 56407.3 1918.52  20 
   1  15   8 54484.9 1703.28  34 
  -1 -15  -8 59642.8 1723.17  29 
  -1 -15  -9 6594.43 633.697  26 
   1  15   9 6168.59 584.225  34 
   1  15   9 6229.31 550.752  28 
   1  15   9 5908.95 541.505  35 
  -1  15  -9 6440.34 705.841  17 
   1 -15   9 5434.06 615.089  27 
   1 -15   9 6295.73 598.625  35 
  -1  15  -9 5570.67 633.496  29 
  -1  15  -9 5942.15 648.347  20 
   1  15  10 2591.88 392.533  34 
   1  15  10 2302.35 324.874  28 
  -1  15 -10 2332.22 391.302  20 
  -1  15 -10 2271.69 422.782  29 
   1 -15  10 1849.73 383.662  27 
  -1  15 -10 1917.51 436.051  17 
  -1 -15 -10 2325.37 371.119  26 
   1  15  10 2169.21 329.094  35 
   1 -15  10 1669.14 304.164  35 
  -1 -15 -10 2449.01 305.331  32 
  -1 -15 -11 106.382 172.702  26 
  -1  15 -11-323.670 188.038  20 
   1  15  11 67.7781 140.230  35 
   1  15  11 108.099 184.078  34 
  -1  15 -11-57.4623 227.423  17 
   1  15  11-71.9845 126.631  28 
   1 -15  11 226.339 214.007  27 
   1 -15  11-64.2471 130.624  35 
  -1  15 -11-271.194 236.640  29 
  -1 -16  11 27690.8 1105.80  27 
   1 -16 -11 30484.3 1034.18  26 
   1  16 -11 29336.1 1101.47  17 
  -1  16  11 28743.2 890.192  30 
   1  16 -11 31014.0 1107.26  29 
  -1  16  11 29479.2 985.086  34 
  -1  16  10 1123.88 260.946  30 
  -1  16  10 1042.16 285.783  35 
  -1  16  10 1300.48 249.039  28 
  -1  16  10 1723.99 347.072  34 
   1  16 -10 1370.76 372.420  29 
  -1 -16  10 930.079 284.822   6 
   1 -16 -10 1462.11 331.583  26 
   1  16 -10 1489.57 341.093  20 
  -1 -16  10 2036.92 439.230  27 
  -1  16   9 104.019 234.014  34 
  -1  16   9 79.2882 187.436  28 
   1  16  -9-90.5604 314.831  29 
  -1 -16   9 108.453 244.608   6 
  -1  16   9 146.494 223.955  35 
  -1 -16   9-18.5606 325.841  27 
   1  16  -9 199.137 273.422  20 
   1 -16  -9 135.392 232.541  26 
  -1 -16   9 151.367 242.249  32 
  -1  16   9-149.593 221.725  30 
  -1  16   8 1905.24 358.185  30 
  -1  16   8 1985.45 400.219  34 
  -1 -16   8 1599.07 415.646  27 
  -1 -16   8 1465.37 444.027   9 
  -1  16   8 1947.40 379.939  28 
  -1  16   8 1605.11 368.574  35 
   1  16  -8 1697.25 455.342  20 
   1  16  -8 1488.66 423.138  29 
   1 -16  -8 2065.23 384.101  26 
  -1 -16   8 1626.78 410.674  32 
  -1 -16   8 1619.81 396.367   6 
  -1  16   7 3044.66 441.921  28 
  -1 -16   7 3452.91 543.565   9 
  -1 -16   7 3308.56 542.501  27 
  -1 -16   7 2638.17 464.617  32 
   1 -16  -7 3595.05 500.298  26 
  -1  16   7 2984.60 419.329  30 
  -1  16   7 2812.99 473.365  34 
  -1  16   7 2938.24 442.854  35 
  -1 -16   7 2930.87 459.186   6 
  -1 -16   6 3622.02 488.158   6 
  -1  16   6 3516.39 472.414  28 
   1 -16  -6 3205.24 474.041   1 
   1 -16  -6 2473.51 411.989  40 
   1 -16  -6 2937.89 470.299  26 
   1  16  -6 2641.00 444.116  21 
  -1 -16   6 2682.44 480.169  24 
  -1  16   6 2962.98 449.974  30 
  -1  16   6 3438.79 473.651  22 
  -1 -16   6 2043.62 425.034  32 
  -1  16   6 1868.82 363.494  35 
  -1 -16   6 2884.28 485.015   9 
  -1  16   6 2908.99 439.998  34 
  -1 -16   6 2938.92 504.504  27 
   1 -16  -5 36054.5 1459.85  26 
  -1  16   5 32783.4 1345.88  35 
  -1 -16   5 33566.3 1484.63  24 
   1 -16  -5 36490.6 1433.26  40 
   1 -16  -5 34112.7 1431.40   1 
  -1  16   5 34346.0 1374.95  28 
   1  16  -5 35399.5 1384.70  37 
  -1 -16   5 34906.1 1423.90  32 
  -1  16   5 33928.1 1418.37  34 
  -1  16   5 34052.2 1418.54  22 
  -1 -16   5 36142.6 1490.62   9 
  -1 -16   5 32196.9 1466.04  27 
   1  16  -5 35323.8 1420.22  21 
  -1 -16   4 1922.56 412.698  24 
   1  16  -4 1570.48 340.704  21 
   1  16  -4 1408.21 311.998  37 
   1 -16  -4 1609.34 357.151   1 
   1 -16  -4 1510.20 341.853  40 
  -1  16   4 1168.74 330.096  37 
  -1  16   4 1856.76 390.447  22 
   1  16  -3 51880.5 1638.29  21 
  -1  16   3 51617.0 1704.67  37 
   1 -16  -3 51993.5 1680.25  40 
  -1  16   3 55317.2 1723.22  22 
  -1 -16   3 50578.7 1697.09  24 
   1 -16  -3 52300.0 1704.55   1 
   1  16  -3 52338.0 1636.28  37 
   1  16  -2 4902.13 517.428  21 
   1  16  -2 5246.12 463.925   2 
  -1  16   2 4703.54 538.256  37 
   1 -16  -2 4399.60 531.276  40 
  -1 -16   2 5814.50 647.670  40 
   1  16  -2 4869.67 513.936  37 
  -1 -16   2 5298.93 564.042  24 
   1 -16  -2 5323.76 527.760  24 
   1 -16  -2 4449.55 510.520   1 
  -1  16   2 3876.32 502.871  21 
  -1 -16   1 100465. 2585.69  40 
   1 -16  -1 97467.5 1990.33  24 
  -1 -16   1 93577.7 1985.65   1 
   1 -16  -1 89152.4 2047.28   1 
   1  16  -1 90509.4 2121.09  37 
  -1  16   1 89032.1 2230.55  21 
  -1 -16   1 92796.0 2114.82  24 
   1  16  -1 93534.3 2115.58  21 
  -1  16   1 90816.2 2070.43  39 
   1 -16  -1 91250.3 2292.76  40 
  -1  16   1 85777.2 2185.87  37 
  -1 -16   0 867.735 328.095  40 
  -1 -16   0 659.563 193.595   1 
   1  16   0 877.740 285.076  37 
   1  16   0 873.709 262.841  21 
  -1  16   0 866.925 243.104   2 
  -1  16   0 476.586 205.078  39 
  -1  16   0 964.595 293.776  21 
   1 -16   0 717.119 219.919  24 
  -1  16   0 503.640 232.638  37 
   1 -16   0 1036.41 302.586  40 
  -1 -16   0 816.068 262.036  24 
   1 -16   1 48945.1 1755.41  40 
   1  16   1 42723.4 1509.31  21 
  -1  16  -1 39890.4 1602.06  39 
  -1  16  -1 44284.9 1394.34   2 
   1  16   1 42494.2 1523.05  37 
  -1 -16  -1 45949.1 1664.71  40 
  -1 -16  -1 47140.4 1482.42   1 
   1 -16   1 45629.9 1435.75  24 
  -1  16  -1 42094.2 1563.70  37 
  -1 -16  -1 45035.7 1467.01  24 
  -1  16  -1 42954.4 1524.29  21 
  -1 -16  -2 1443.22 329.181  24 
   1 -16   2 1553.58 352.697  40 
  -1 -16  -2 1315.47 353.143  40 
  -1  16  -2 1229.44 268.685   2 
   1 -16   2 1377.12 315.845  24 
  -1  16  -2 948.729 276.041  37 
   1  16   2 1129.52 313.078  21 
  -1  16  -2 955.542 318.722  39 
   1  16   2 1438.11 343.513  37 
  -1  16  -2 1430.73 330.608  21 
  -1 -16  -2 1468.12 302.476   1 
   1 -16   3 11339.4 795.621  24 
  -1  16  -3 9613.11 892.771  39 
   1  16   3 13675.2 865.317  22 
  -1  16  -3 12959.1 802.330   2 
   1 -16   3 15761.4 999.585  40 
  -1  16  -3 12148.9 851.490  21 
   1  16   3 11818.8 811.615  37 
  -1  16  -3 13127.5 876.634  37 
  -1 -16  -3 13764.5 850.263   1 
  -1 -16  -3 13661.8 887.770  24 
  -1 -16  -3 12868.4 881.191  40 
  -1  16  -4 950.436 283.104  21 
  -1  16  -4 805.467 340.804  39 
   1  16   4 1127.97 294.555  37 
   1 -16   4 1184.03 342.722  24 
  -1  16  -4 1133.73 288.510   2 
   1  16   4 1246.08 323.049  22 
  -1 -16  -4 1074.93 292.726   1 
  -1 -16  -4 1198.67 320.108  40 
  -1 -16  -4 1509.66 341.611  24 
   1 -16   5 11964.3 845.559  32 
  -1 -16  -5 13366.4 897.627  32 
  -1  16  -5 9648.38 915.136  39 
  -1 -16  -5 12316.3 844.131   1 
   1 -16   5 11149.2 879.806  24 
   1 -16   5 11389.5 840.115  27 
   1  16   5 8948.92 723.451  34 
  -1  16  -5 9719.66 849.666  31 
  -1 -16  -5 13240.7 921.838  26 
   1  16   5 13463.6 876.695  22 
   1 -16   5 12607.8 880.547   9 
  -1 -16  -5 9347.69 760.614  40 
   1  16   5 9792.87 763.724  37 
  -1  16  -5 11645.7 851.496  21 
  -1  16  -5 12588.0 855.700   2 
   1  16   5 13841.1 894.546  28 
  -1  16  -6 5342.47 733.455  20 
   1 -16   6 4014.92 556.808   9 
   1  16   6 4479.92 519.395  28 
   1 -16   6 3367.22 456.540  27 
  -1 -16  -6 4520.85 566.415  26 
  -1 -16  -6 4662.84 553.982   1 
   1  16   6 4255.59 524.572  22 
   1  16   6 4427.16 495.622  35 
   1  16   6 4608.95 562.089  34 
   1 -16   6 3821.52 503.223  32 
  -1  16  -6 4452.85 613.566  31 
  -1  16  -6 4070.36 521.312   2 
   1  16   7 83021.6 2026.69  28 
  -1  16  -7 85314.1 2370.34  29 
  -1  16  -7 82312.5 2426.21  20 
   1 -16   7 75385.7 2168.40  27 
   1 -16   7 78222.6 2172.64   9 
   1 -16   7 81158.5 2179.46  32 
   1  16   7 82624.9 2116.43  34 
   1  16   7 82381.4 2017.90  35 
  -1 -16  -7 79450.6 2161.59  26 
  -1  16  -8 323.889 303.507  29 
   1 -16   8 578.691 382.096   9 
   1  16   8 523.186 279.229  34 
   1  16   8 492.704 316.163  28 
   1 -16   8 42.5645 235.378  32 
  -1  16  -8 294.280 371.512  20 
  -1 -16  -8 149.919 267.098  26 
   1 -16   8 265.630 362.299  27 
   1 -16   8 350.388 271.195  35 
   1  16   8 347.872 241.456  35 
  -1 -16  -9 33581.5 1166.78  32 
  -1  16  -9 32462.3 1354.21  20 
   1 -16   9 31905.9 1352.56  27 
   1  16   9 33159.8 1165.43  28 
  -1  16  -9 33768.5 1452.72  17 
  -1 -16  -9 32781.1 1281.86  26 
  -1  16  -9 32549.4 1348.44  29 
   1  16   9 32540.6 1166.97  35 
   1 -16   9 34047.6 1268.60  35 
   1  16   9 31770.0 1211.42  34 
  -1  16 -10 1297.93 324.056  29 
  -1 -16 -10 1412.92 250.449  32 
  -1  16 -10 1609.43 394.012  17 
  -1 -16 -10 1545.18 315.917  26 
   1 -16  10 1176.49 310.346  27 
   1  16  10 1550.08 311.982  34 
   1  16  10 1640.63 266.835  28 
   1  16  10 1138.21 243.095  35 
   1 -16  10 990.203 234.098  35 
  -1  16 -10 1637.88 341.730  20 
  -1  16 -11 406.057 198.204  29 
   1 -16  11 344.266 197.550  27 
   1  16  11 324.528 129.306  28 
   1  16  11 506.767 179.371  34 
  -1 -16 -11 524.019 187.293  26 
  -1  16 -11 348.387 225.458  17 
  -1  16 -11 607.065 188.696  20 
  -1 -17  11 3722.04 425.935  27 
   1  17 -11 3865.39 425.184  17 
  -1  17  11 3846.57 370.672  34 
   1 -17 -11 4017.39 346.275  32 
   1 -17 -11 3928.94 375.167  26 
   1  17 -11 4273.30 425.306  29 
  -1  17  11 3804.84 310.790  30 
  -1  17  10 14030.8 688.939  30 
  -1  17  10 14771.1 685.946  28 
  -1 -17  10 13949.4 911.945  27 
   1  17 -10 14317.7 865.707  29 
   1  17 -10 13940.2 795.835  20 
   1 -17 -10 14629.3 789.159  26 
  -1  17  10 13677.8 757.501  34 
   1  17  -9-35.4568 285.083  20 
  -1  17   9 49.0333 191.691  30 
  -1  17   9 433.411 233.648  28 
  -1  17   9 214.443 221.019  35 
   1 -17  -9 294.393 269.940  26 
  -1 -17   9-7.24530 332.578  27 
  -1 -17   9 286.867 228.025   6 
   1  17  -9 287.499 291.613  29 
  -1 -17   9 109.045 266.049  32 
  -1  17   9 251.133 245.531  34 
   1  17  -8-29.6878 315.796  20 
  -1 -17   8 274.344 306.254  27 
  -1  17   8 211.657 235.620  28 
  -1 -17   8 218.647 283.286   9 
  -1 -17   8 458.826 277.214   6 
   1  17  -8 370.539 307.760  29 
  -1  17   8 167.203 244.530  34 
  -1  17   8 83.6429 218.799  35 
   1 -17  -8 490.268 269.526  26 
  -1 -17   8 676.959 343.833  32 
  -1  17   8 308.687 217.296  30 
  -1 -17   7 2155.44 481.116  27 
  -1 -17   7 1878.49 468.752   9 
   1 -17  -7 2964.90 457.479  26 
  -1 -17   7 2321.84 417.431   6 
  -1  17   7 2445.56 407.005  35 
  -1 -17   7 1685.74 422.528  32 
  -1  17   7 2119.37 401.630  34 
  -1  17   7 2092.37 377.637  28 
  -1  17   7 2709.38 421.174  30 
  -1 -17   6 90.2356 288.009   9 
  -1  17   6 168.345 248.371  34 
  -1  17   6-47.9273 233.779  28 
   1  17  -6 1.84443 233.712  31 
  -1  17   6-130.589 189.747  30 
   1 -17  -6 205.385 254.701  26 
  -1 -17   6-203.036 268.815  32 
  -1 -17   6 51.3721 261.435  27 
  -1 -17   6 571.432 300.807   6 
  -1 -17   5 1287.71 369.887   9 
  -1 -17   5 1088.88 346.566  32 
  -1 -17   5 1215.78 378.432  24 
  -1 -17   5 1344.36 349.292  27 
   1  17  -5 1234.15 334.588  21 
  -1 -17   5 1533.79 365.729   6 
  -1  17   5 1127.77 294.525  28 
   1 -17  -5 1140.85 324.311   1 
   1  17  -5 785.974 312.861  31 
   1 -17  -5 1462.15 357.061  40 
  -1  17   5 931.286 296.220  22 
  -1  17   5 1059.91 321.322  34 
  -1  17   5 730.491 238.561  30 
   1  17  -5 1135.72 289.284  37 
   1 -17  -5 789.860 257.171  26 
   1  17  -4 14290.2 962.190  31 
   1 -17  -4 15038.3 959.483   1 
   1 -17  -4 15804.3 956.212  40 
  -1  17   4 14885.6 933.314  28 
   1 -17  -4 15414.5 966.815  26 
  -1 -17   4 16050.6 998.795   9 
  -1 -17   4 13758.5 957.056  24 
  -1 -17   4 14643.1 950.817  32 
  -1  17   4 14349.5 976.222  37 
  -1  17   4 15722.1 964.271  22 
  -1  17   4 13487.3 902.259  34 
   1  17  -4 15155.5 950.256  21 
   1 -17  -4 16732.8 980.011  32 
   1  17  -4 15233.1 942.655  37 
   1 -17  -3 2484.83 412.242   1 
  -1  17   3 3254.32 475.795  37 
   1 -17  -3 3187.44 463.044  40 
   1  17  -3 2848.42 420.748  21 
  -1 -17   3 2870.35 461.278  24 
   1  17  -3 3358.88 468.453  37 
  -1 -17   3 4625.75 602.784  40 
  -1  17   3 3506.82 490.947  22 
   1 -17  -2 2358.52 393.802   1 
  -1  17   2 2051.77 384.086  37 
   1 -17  -2 2655.18 440.895  40 
  -1 -17   2 3289.79 505.718  40 
  -1  17   2 2373.41 405.848  22 
  -1 -17   2 2108.76 394.229  24 
   1  17  -2 2723.00 423.432  37 
   1  17  -2 2629.85 409.838  21 
  -1 -17   1 8999.34 715.239  24 
   1 -17  -1 9142.09 767.171  40 
   1  17  -1 8668.36 724.367  37 
   1  17  -1 8356.07 693.672  21 
  -1 -17   1 10816.2 864.569  40 
  -1  17   1 7888.85 705.669  21 
   1 -17  -1 9735.65 679.551  24 
   1 -17  -1 8665.42 682.872   1 
  -1  17   1 8513.38 736.795  37 
  -1  17   0 122397. 2700.24  37 
  -1 -17   0 137471. 3043.49  40 
   1 -17   0 121587. 2451.35   1 
  -1 -17   0 127777. 2535.52  24 
  -1  17   0 132780. 2457.30   2 
   1  17   0 129790. 2666.25  37 
   1  17   0 131419. 2634.23  21 
  -1  17   0 124709. 2656.60  39 
   1 -17   0 137746. 2471.47  24 
  -1  17   0 130207. 2731.44  21 
   1 -17   0 138240. 2944.28  40 
   1 -17   1 3787.90 530.279  40 
   1 -17   1 3192.34 424.649  24 
  -1 -17  -1 2627.58 395.622  24 
  -1  17  -1 3107.12 415.473   2 
  -1 -17  -1 3751.29 520.953  40 
  -1  17  -1 2673.12 460.452  39 
  -1 -17  -1 3366.77 429.854   1 
  -1  17  -1 3905.24 493.823  21 
  -1  17  -1 2672.09 438.868  37 
   1  17   1 3271.86 468.837  37 
   1  17   1 2802.38 443.975  21 
  -1 -17  -2 671.958 248.232  40 
   1  17   2 661.183 262.973  37 
  -1  17  -2 699.126 261.683  37 
   1 -17   2 528.159 246.497  40 
   1  17   2 615.652 262.220  21 
  -1  17  -2 727.574 247.655   2 
  -1 -17  -2 850.852 266.925  24 
  -1 -17  -2 673.501 220.329   1 
  -1  17  -2 598.852 250.656  21 
  -1  17  -2 605.187 270.638  39 
   1 -17   2 516.415 246.904  24 
   1  17   2 574.082 267.270  22 
  -1 -17  -3 1384.11 327.100   1 
  -1 -17  -3 1421.00 328.571  24 
  -1  17  -3 1372.70 323.766   2 
   1  17   3 964.415 294.569  37 
   1  17   3 1019.82 307.131  22 
  -1  17  -3 1062.67 312.356  21 
  -1 -17  -3 1071.98 312.813  40 
   1 -17   3 969.139 311.291  24 
  -1  17  -3 891.689 333.942  39 
   1 -17   3 660.253 243.012  40 
   1 -17   4 369.109 263.909   9 
  -1  17  -4 262.951 211.976   2 
  -1 -17  -4 306.139 229.891  32 
  -1 -17  -4 73.6419 193.031  40 
   1  17   4-0.56415 203.109  22 
  -1 -17  -4 254.470 166.833   1 
   1  17   4 491.910 260.251  28 
   1 -17   4 214.651 281.925  27 
  -1 -17  -4 306.128 234.534  26 
   1  17   4 270.609 208.929  34 
  -1  17  -4 295.044 284.750  31 
   1  17   4 297.754 213.398  37 
  -1  17  -4 124.366 239.279  39 
   1 -17   4 51.4482 152.202  32 
  -1  17  -4 92.6996 177.166  21 
  -1 -17  -4 375.020 244.957  24 
   1 -17   4-26.9991 239.456  24 
  -1  17  -5 1397.93 418.966  31 
   1 -17   5 1469.85 362.776  32 
  -1 -17  -5 1348.82 340.938  26 
  -1  17  -5 1178.81 353.257  39 
  -1  17  -5 1775.30 374.738   2 
   1  17   5 1601.65 354.535  28 
  -1 -17  -5 1262.43 314.506   1 
   1 -17   5 571.152 300.099  27 
   1 -17   5 846.139 293.844  24 
  -1 -17  -5 1279.36 343.331  32 
   1  17   5 935.877 269.042  37 
   1 -17   5 1092.72 351.589   9 
   1  17   5 1500.25 360.454  34 
   1  17   5 622.306 259.985  22 
  -1 -17  -5 404.408 202.177  40 
  -1 -17  -6 24266.4 1193.59  32 
  -1 -17  -6 23215.2 1242.11  26 
   1 -17   6 22434.0 1190.46   9 
   1 -17   6 24710.7 1216.69  32 
   1 -17   6 20923.0 1156.04  27 
   1  17   6 25142.2 1193.17  34 
  -1  17  -6 23576.8 1393.50  20 
   1  17   6 25062.7 1172.16  28 
  -1  17  -6 27565.6 1375.14  31 
  -1 -17  -7 8921.52 711.001  32 
   1  17   7 8556.55 702.976  28 
   1 -17   7 8521.52 763.824  27 
  -1  17  -7 9031.64 810.034  29 
   1  17   7 8110.13 665.436  35 
  -1  17  -7 8043.13 814.395  20 
   1 -17   7 7562.89 695.083  32 
  -1 -17  -7 7467.37 708.550  26 
   1  17   7 7929.88 699.000  34 
   1 -17   7 7525.38 743.852   9 
   1 -17   8 55795.5 1759.43  32 
   1 -17   8 52283.2 1733.26   9 
   1  17   8 55115.0 1647.13  34 
   1  17   8 55732.6 1575.26  28 
  -1 -17  -8 56839.1 1611.52  32 
   1 -17   8 60000.4 1727.92  35 
  -1  17  -8 55873.9 1851.02  29 
   1  17   8 57451.1 1579.80  35 
  -1 -17  -8 53369.9 1699.44  26 
   1 -17   8 53662.9 1781.25  27 
  -1  17  -8 54332.3 1875.11  20 
  -1  17  -9 317.013 292.357  20 
   1  17   9 205.610 240.284  34 
   1  17   9 361.115 203.222  35 
   1  17   9 320.712 224.168  28 
   1 -17   9 296.348 296.384  27 
  -1  17  -9 74.1077 278.314  29 
  -1 -17  -9 77.6514 233.527  26 
  -1 -17  -9 258.886 196.323  32 
  -1  17  -9 250.909 312.384  17 
  -1 -17 -10 691.111 166.445  32 
  -1  17 -10 252.690 210.421  20 
  -1  17 -10 669.573 292.725  17 
   1 -17  10 403.354 222.079  27 
   1  17  10 462.687 192.279  28 
   1  17  10 694.819 244.769  34 
  -1  17 -10 527.589 243.221  29 
  -1 -17 -10 609.233 240.108  26 
   1 -17  11 806.265 213.429  27 
  -1 -17 -11 420.639 143.626  26 
  -1  17 -11 616.221 213.193  17 
  -1  17 -11 669.782 179.497  20 
  -1  17 -11 700.618 201.864  29 
   1 -17  11 490.472 182.514  16 
   1  17  11 707.054 151.106  28 
   1  17  11 855.264 191.000  34 
  -1 -18  11 6629.89 503.266  27 
   1  18 -11 7747.07 505.851  29 
  -1  18  11 7094.97 441.383  34 
   1 -18 -11 7963.48 466.472  26 
   1 -18 -11 7963.57 425.747  32 
  -1  18  11 6754.70 343.023  30 
   1  18 -11 7016.56 489.275  17 
   1 -18 -10 1786.72 286.342  32 
  -1  18  10 1870.46 268.094  28 
   1  18 -10 1457.54 362.732  17 
  -1  18  10 1793.90 257.663  30 
   1  18 -10 1606.59 316.787  20 
   1  18 -10 1621.39 337.937  29 
  -1 -18  10 2180.96 402.166  27 
  -1  18  10 1838.39 311.129  34 
   1 -18 -10 1474.16 278.775  26 
   1 -18  -9 4158.84 451.614  32 
   1  18  -9 3297.52 475.025  20 
  -1  18   9 3347.89 387.325  30 
  -1  18   9 3571.09 404.268  28 
  -1 -18   9 3746.30 536.150  27 
   1  18  -9 4137.47 547.035  29 
   1 -18  -9 3917.03 464.369  26 
  -1 -18   9 3052.79 403.827   6 
  -1 -18   9 3235.63 470.338  32 
  -1  18   9 3836.94 462.519  34 
   1 -18  -8 59.9653 211.597  26 
  -1 -18   8 166.124 241.749   6 
  -1  18   8 266.121 211.116  30 
  -1 -18   8 207.608 290.124  32 
  -1 -18   8 6.32035 310.031  27 
   1  18  -8-65.9642 327.557  20 
  -1  18   8 62.1728 234.297  28 
  -1  18   8 142.876 249.827  34 
   1  18  -8 114.534 299.603  29 
  -1 -18   8 109.571 309.268   9 
  -1  18   7 338.990 235.145  28 
  -1 -18   7 460.874 282.198   6 
  -1 -18   7 657.320 369.513   9 
  -1 -18   7 281.986 273.581  27 
   1 -18  -7 386.719 241.940  26 
  -1  18   7 605.628 295.799  34 
  -1  18   7 433.232 238.484  30 
  -1 -18   7 365.472 278.606  32 
  -1 -18   6-46.9265 305.902   9 
  -1  18   6-8.12422 176.495  30 
  -1  18   6-15.5757 274.790  28 
  -1 -18   6 153.753 258.971  32 
  -1  18   6-178.719 270.546  34 
  -1 -18   6 233.422 285.025  27 
   1  18  -6 36.0091 293.439  31 
   1 -18  -6 175.839 250.659  26 
   1 -18  -6 27.0204 229.316  32 
  -1 -18   6 131.844 251.355   6 
  -1 -18   5 26.8881 256.459   6 
   1 -18  -5 265.015 199.443  40 
  -1 -18   5 133.368 247.166  27 
  -1 -18   5 177.946 266.760  32 
   1 -18  -5 126.862 234.455  26 
  -1 -18   5 169.297 270.880   9 
   1 -18  -5 97.4297 225.024  32 
   1  18  -5 68.2836 297.728  31 
  -1  18   5 2.09040 233.594  30 
  -1  18   5-159.290 252.374  34 
  -1  18   5 144.385 244.748  28 
   1 -18  -4 1492.07 329.051  40 
  -1 -18   4 557.391 288.476  24 
   1  18  -4 520.325 249.555  31 
  -1 -18   4 1042.47 272.168   6 
  -1 -18   4 1284.51 396.116   9 
  -1  18   4 1393.14 335.488  30 
   1 -18  -4 823.462 269.907  26 
   1 -18  -4 1195.04 303.292   1 
   1 -18  -4 1333.75 356.920  32 
  -1 -18   4 90.7654 440.941  27 
   1  18  -4 1071.49 308.459  37 
  -1 -18   4 1513.01 375.684  32 
   1  18  -4 977.167 287.809  21 
  -1  18   4 1130.71 322.192  34 
  -1  18   4 951.238 319.008  28 
  -1  18   4 1555.16 352.245  22 
  -1  18   4 1291.06 339.086  37 
  -1  18   3 2299.32 414.837  28 
  -1 -18   3 2242.28 419.014   9 
   1 -18  -3 3150.57 447.876  40 
  -1 -18   3 2225.32 411.471  32 
  -1 -18   3 1837.35 379.835  26 
   1 -18  -3 2443.22 395.044  26 
   1  18  -3 2750.51 430.541  21 
   1 -18  -3 1965.77 363.192  32 
  -1  18   3 2425.52 422.340  37 
  -1  18   3 2480.93 422.823  22 
   1 -18  -3 2313.21 414.167   1 
   1  18  -3 2479.44 423.456  37 
  -1 -18   3 1864.13 393.935  24 
   1  18  -3 2243.47 433.122  31 
  -1  18   3 1718.55 333.295  34 
  -1  18   3 2526.04 400.494  30 
  -1  18   2 905.676 305.450  37 
  -1 -18   2 1550.27 399.290  40 
  -1 -18   2 988.956 318.104  24 
   1  18  -2 714.277 259.013  37 
   1  18  -2 1175.33 304.340  21 
   1 -18  -2 1617.82 368.335  40 
   1 -18  -2 932.648 287.102   1 
  -1  18   2 728.894 299.145  22 
  -1 -18   1 17929.7 1159.46  40 
  -1  18   1 13859.0 931.771  37 
   1  18  -1 14400.9 937.691  37 
   1  18  -1 15040.1 937.962  21 
  -1  18   1 14272.7 953.255  21 
   1 -18  -1 16339.0 1014.40  40 
   1 -18  -1 14150.7 894.122   1 
  -1 -18   1 14976.9 935.418  24 
   1  18  -1 15078.2 949.569  39 
   1  18   0 756.708 277.295  37 
  -1  18   0 794.180 271.749  21 
  -1 -18   0 512.690 255.721  24 
  -1  18   0 506.787 264.591  37 
  -1  18   0 537.306 246.301  39 
   1  18   0 762.024 270.847  21 
   1 -18   0 794.136 256.967  24 
   1 -18   0 877.868 321.437  40 
   1 -18   0 625.553 248.134   1 
  -1 -18   0 1060.34 334.097  40 
  -1  18  -1 7755.28 738.292  21 
  -1  18  -1 7210.44 706.173  37 
  -1 -18  -1 8539.86 768.619  40 
   1  18   1 6730.27 683.797  21 
   1  18   1 8153.81 715.590  37 
   1 -18   1 7375.40 633.156  24 
  -1  18  -1 7438.49 648.098   2 
  -1  18  -1 7494.17 730.614  39 
  -1 -18  -1 7911.69 692.901  24 
   1 -18   1 8746.50 778.102  40 
  -1  18  -2 877.751 419.274  31 
  -1  18  -2 114.644 202.607  21 
   1 -18   2 220.950 237.209  40 
   1  18   2 235.948 194.486  28 
  -1  18  -2-6.88831 185.707  37 
  -1 -18  -2 222.462 202.477  26 
  -1 -18  -2 292.199 239.693  40 
  -1  18  -2 117.637 195.568  39 
   1 -18   2 154.685 210.253  32 
  -1 -18  -2 132.248 192.560  32 
  -1 -18  -2 151.285 235.553  24 
   1  18   2 120.812 182.146  37 
   1 -18   2 81.0644 201.070  24 
  -1  18  -2 207.315 204.339   2 
   1  18   2-29.6749 184.976  21 
   1 -18   2 8.54632 251.375   9 
   1  18   2-24.1128 233.039  22 
  -1 -18  -3 838.888 291.307  26 
  -1  18  -3 894.520 300.629  21 
   1 -18   3 970.064 265.157  32 
   1  18   3 1486.90 341.943  31 
  -1  18  -3 972.891 341.335  39 
   1 -18   3 1575.26 373.001  40 
  -1 -18  -3 1556.29 361.704  24 
  -1  18  -3 1425.87 317.972   2 
  -1  18  -3 1109.78 351.125  28 
  -1 -18  -3 900.952 295.083  40 
   1 -18   3 1148.29 333.871  24 
   1  18   3 1382.46 357.588  28 
   1 -18   3 2099.67 445.735  27 
  -1  18  -3 1453.15 409.462  31 
   1  18   3 1064.55 276.072  34 
   1 -18   3 1535.29 370.553   9 
  -1 -18  -3 1245.96 307.366  32 
   1  18   3 1396.58 329.483  37 
   1  18   3 875.902 303.262  22 
   1 -18   4-25.2910 180.389  24 
  -1  18  -4 278.660 213.891  21 
   1  18   4 270.603 239.286  34 
   1  18   4-109.826 227.843  28 
   1 -18   4 103.804 276.501   9 
  -1  18  -4 20.2061 233.894  39 
  -1  18  -4 113.285 197.831   2 
   1 -18   4-39.8571 252.709  32 
   1 -18   4-69.3619 270.175  27 
   1  18   4 30.2121 217.028  22 
  -1 -18  -4-6.73482 232.177  26 
  -1 -18  -4-566.889 284.657  40 
   1  18   4-50.9954 162.226  37 
  -1  18  -4 234.029 344.101  31 
  -1 -18  -4-43.2140 193.628  32 
   1 -18   5 3798.81 541.309   9 
  -1  18  -5 3526.50 569.293  31 
  -1 -18  -5 3675.23 499.277  32 
   1  18   5 4046.13 518.361  28 
   1  18   5 3916.40 509.293  34 
  -1 -18  -5 3304.97 507.275  26 
   1 -18   5 2813.87 465.889  27 
   1 -18   5 3432.02 492.023  32 
   1  18   6 3515.46 491.657  28 
   1 -18   6 2138.04 422.291  27 
   1 -18   6 2468.98 464.562   9 
  -1  18  -6 3300.25 609.349  20 
  -1  18  -6 3687.99 561.572  31 
  -1 -18  -6 3185.66 463.309  32 
   1  18   6 3105.79 459.843  34 
   1 -18   6 2156.02 415.686  32 
  -1 -18  -6 2568.68 442.084  26 
  -1 -18  -7 16960.4 928.567  32 
   1 -18   7 16346.0 1017.23  27 
   1  18   7 16286.6 918.226  28 
  -1  18  -7 17793.2 1064.53  29 
  -1  18  -7 15329.9 1070.50  20 
   1 -18   7 15196.4 973.507   9 
  -1 -18  -7 15597.7 955.398  26 
   1 -18   7 15928.9 974.640  32 
   1  18   7 15535.1 914.682  34 
   1 -18   8 8125.77 670.239  32 
   1 -18   8 7510.34 722.599   9 
  -1  18  -8 8027.99 765.676  20 
   1  18   8 8029.13 631.661  28 
  -1  18  -8 7920.71 714.132  29 
   1 -18   8 8341.36 730.994  27 
  -1 -18  -8 8110.13 688.187  26 
   1  18   8 7912.62 641.351  34 
  -1 -18  -8 8673.72 621.086  32 
  -1 -18  -9 5128.08 431.253  32 
   1  18   9 5364.93 462.685  28 
  -1  18  -9 4721.08 532.698  29 
  -1  18  -9 5078.11 577.884  17 
   1 -18   9 4532.66 521.259  27 
  -1 -18  -9 4602.46 488.286  26 
   1  18   9 4560.72 465.246  34 
  -1  18  -9 4654.98 533.861  20 
   1  18  10 41.9777 135.394  28 
  -1  18 -10-283.192 213.298  29 
  -1  18 -10-103.517 207.743  20 
  -1  18 -10-202.577 227.953  17 
  -1 -18 -10-117.728 115.121  32 
  -1 -18 -10 29.0197 177.256  26 
   1  18  10-76.0882 173.676  34 
   1 -18  10 112.357 197.242  27 
  -1  19  10 3289.01 288.043  30 
   1  19 -10 3428.54 398.906  29 
   1  19 -10 3314.51 362.386  20 
  -1 -19  10 3294.44 420.349  27 
   1 -19 -10 3131.73 347.588  26 
  -1  19  10 3360.85 362.877  34 
   1 -19 -10 3591.98 341.029  32 
  -1  19  10 3439.15 312.161  28 
   1  19 -10 3393.59 426.033  17 
  -1  19   9 149.254 147.869  30 
  -1 -19   9 11.2350 258.270  27 
  -1  19   9-265.471 226.672  28 
   1  19  -9 256.219 263.280  20 
   1 -19  -9 5.13188 210.148  26 
  -1  19   9-91.1523 234.508  34 
   1  19  -9 15.1948 242.591  29 
  -1 -19   9 232.933 195.049   6 
   1 -19  -9 169.331 186.584  32 
  -1 -19   8 1549.93 387.766  32 
   1 -19  -8 1932.49 362.455  32 
  -1 -19   8 1474.62 390.671  27 
   1  19  -8 1712.98 421.986  29 
  -1 -19   8 2022.77 360.092   6 
  -1  19   8 1793.43 318.374  30 
   1 -19  -8 1917.08 368.169  26 
   1  19  -8 1628.96 434.993  20 
  -1  19   8 1416.91 324.301  34 
  -1  19   8 1474.69 328.614  28 
  -1 -19   7 809.464 353.449   9 
  -1  19   7 1067.07 303.754  34 
  -1  19   7 925.177 283.041  30 
  -1 -19   7 813.608 347.272  27 
  -1  19   7 1077.20 322.745  28 
   1 -19  -7 1214.68 326.712  26 
  -1 -19   7 782.211 327.610  32 
  -1 -19   7 973.686 312.741   6 
   1 -19  -7 1227.28 335.192  32 
  -1 -19   6 975.503 358.762  32 
   1 -19  -6 1696.67 386.806  26 
  -1 -19   6 1492.88 426.151   9 
  -1  19   6 1192.62 338.010  28 
  -1 -19   6 1517.33 408.476  27 
  -1  19   6 1589.95 349.335  30 
   1 -19  -6 1730.38 368.386  32 
   1  19  -6 1904.28 413.180  31 
  -1  19   6 914.195 299.837  34 
  -1 -19   6 1440.19 355.893   6 
   1 -19  -5 231.067 274.872  32 
   1  19  -5 75.9107 297.940  31 
  -1  19   5-108.939 270.944  28 
  -1  19   5 154.716 221.059  34 
  -1  19   5 191.145 216.060  30 
   1 -19  -5-93.8811 258.827  26 
  -1 -19   5 323.480 304.404   9 
  -1 -19   5 280.217 293.375  27 
  -1 -19   5 193.718 252.915   6 
  -1 -19   5 28.9915 239.142  32 
   1  19  -4 5073.98 588.392  37 
   1  19  -4 5622.55 667.312  31 
   1 -19  -4 5916.07 618.871  26 
  -1  19   4 5151.44 591.415  28 
  -1 -19   4 6707.54 601.013   6 
  -1 -19   4 6706.30 698.508   9 
  -1 -19   4 4140.50 532.620  27 
  -1  19   4 6185.69 607.636  30 
   1 -19  -4 6010.37 613.701  32 
  -1  19   4 5080.63 590.569  34 
  -1 -19   4 5840.93 661.454  32 
  -1  19   3 228.240 201.465  37 
  -1  19   3 217.729 185.820  34 
   1 -19  -3 476.938 263.659  40 
   1  19  -3 406.742 246.693  21 
   1 -19  -3 325.713 227.267   1 
   1  19  -3-11.9242 313.657  31 
  -1 -19   3 288.481 288.769   9 
   1  19  -3 642.882 252.795  37 
   1 -19  -3 347.593 228.575  26 
  -1 -19   3 517.767 277.270  26 
  -1  19   3 87.2283 264.907  28 
  -1 -19   3 201.865 210.009  24 
  -1 -19   3 359.667 239.705  32 
  -1 -19   3 431.387 227.112   6 
  -1 -19   3-95.6646 357.845  27 
  -1  19   3 303.063 218.045  22 
   1 -19  -3 542.856 275.213  32 
  -1  19   3 544.452 270.699  30 
  -1  19   2 511.021 234.452  37 
  -1  19   2 734.020 333.074  28 
   1  19  -2 923.974 322.430  39 
  -1 -19   2 1182.37 369.385  40 
   1  19  -2 1248.71 361.402  31 
   1 -19  -2 456.358 237.713  26 
  -1  19   2 624.983 279.327  22 
  -1  19   2 603.817 253.267  34 
  -1  19   2 969.603 275.029  30 
   1  19  -2 661.895 274.850  21 
  -1  19   2 671.496 265.254  31 
   1  19  -2 579.160 269.413  37 
   1 -19  -2 965.047 301.374  40 
   1 -19  -2 1018.72 329.570  32 
  -1 -19   2 580.822 268.269  26 
  -1 -19   2 942.804 320.595   9 
  -1 -19   2 952.916 305.137  32 
  -1 -19   2 924.642 328.545  24 
   1 -19  -2 449.158 258.061   1 
  -1  19   1-54.6469 193.290  37 
  -1  19   1 528.287 235.493  28 
   1  19  -1 337.535 243.316  28 
  -1  19   1 198.318 211.656  30 
   1  19  -1 890.680 331.621  31 
  -1  19   1 184.431 179.697  34 
  -1 -19   1 351.677 234.313   8 
   1  19  -1 463.589 230.891  21 
   1 -19  -1 675.835 262.006  40 
  -1 -19   1 426.839 246.779  26 
   1 -19  -1 657.182 260.051  26 
  -1  19   1 763.119 301.702  31 
  -1 -19   1 268.686 224.842  24 
   1 -19  -1 554.774 263.790   1 
  -1 -19   1 676.093 287.961  40 
   1  19  -1 425.516 226.264  37 
   1 -19  -1 557.531 230.217  32 
  -1  19   1 423.060 229.010  21 
  -1 -19   1 526.636 273.871   9 
  -1 -19   1 596.396 267.447  32 
   1 -19   0 749.914 263.830  32 
   1  19   0 1047.85 343.028  31 
  -1 -19   0 551.489 254.928  32 
  -1  19   0 959.319 330.301  21 
  -1 -19   0 1234.32 345.983   9 
   1 -19   0 901.434 288.491   1 
  -1  19   0 945.023 333.435  37 
  -1 -19   0 941.548 297.655   8 
   1 -19   0 1053.06 314.431  26 
  -1  19   0 299.658 218.546  28 
   1  19   0 1085.28 334.604  28 
  -1 -19   0 936.578 336.916  40 
  -1 -19   0 882.458 299.052  26 
  -1 -19   0 724.154 292.556  24 
  -1  19   0 734.419 284.448  30 
   1  19   0 916.334 294.764  37 
   1 -19   0 1010.36 310.065  40 
  -1  19   0 535.117 265.701  31 
   1  19   0 1044.91 305.048  21 
  -1 -19  -1 637.220 256.355  32 
   1 -19   1 737.345 279.895  32 
   1  19   1 983.203 282.968  31 
   1  19   1 269.172 222.528  21 
  -1 -19  -1 611.514 255.093  24 
  -1  19  -1 622.859 283.628  37 
   1 -19   1 748.711 313.930   9 
   1  19   1 512.790 260.158  37 
  -1  19  -1 242.818 199.859  21 
   1 -19   1 490.835 259.170  26 
  -1 -19  -1 450.513 270.098  26 
  -1  19  -1 541.652 361.374  31 
   1  19   1 617.889 264.600  28 
  -1  19  -1 750.348 247.907   2 
   1 -19   1 397.738 186.978   1 
  -1  19  -1 383.751 216.690  39 
  -1 -19  -1 933.596 315.266  40 
   1 -19   1 638.196 287.728  40 
   1 -19   1 973.163 310.424  24 
  -1  19  -1 391.770 259.599  28 
   1 -19   2 302.592 225.371  32 
  -1  19  -2-18.8448 217.823  28 
   1  19   2 148.592 214.383  22 
  -1  19  -2 9.64047 195.087  37 
  -1  19  -2 347.028 362.129  31 
   1  19   2 338.086 274.300  31 
  -1 -19  -2 256.437 270.422  32 
  -1  19  -2 271.754 188.061  21 
   1 -19   2 268.944 244.294  40 
   1 -19   2 68.1404 232.047   9 
   1  19   2 8.38270 169.093  37 
  -1  19  -2-37.4692 197.573   2 
   1 -19   2 1493.99 487.845  27 
   1 -19   2 82.2708 204.821  26 
  -1 -19  -2-126.540 242.741  26 
   1  19   2-38.0257 225.402  28 
  -1  19  -2 290.716 255.741  39 
   1 -19   2 65.1521 213.772  24 
  -1 -19  -2 196.704 207.861  40 
  -1 -19  -2-260.814 270.319  24 
  -1  19  -3 142.704 187.056  21 
  -1  19  -3 117.939 185.571  39 
   1  19   3-1.64490 226.313  28 
   1  19   3 44.8393 229.994  31 
  -1  19  -3 42.9797 240.652  28 
   1 -19   3-47.4331 261.207   9 
  -1  19  -3-95.7977 318.854  31 
  -1 -19  -3 122.104 230.738  26 
   1 -19   3 648.744 352.556  27 
  -1 -19  -3 68.7921 178.061  40 
   1 -19   3 164.201 276.794  32 
  -1  19  -3-152.165 209.092   2 
   1  19   3 85.0274 176.037  37 
  -1 -19  -3-125.836 217.884  32 
   1  19   3 351.941 213.659  34 
   1 -19   3-133.011 228.766  24 
   1  19   3 147.904 210.331  22 
  -1 -19  -4 2142.14 430.609  26 
   1  19   4 2061.86 378.123  34 
   1 -19   4 1703.12 374.551  32 
  -1 -19  -4 1658.87 358.518  32 
   1 -19   4 1862.67 418.119   9 
   1  19   4 1919.94 393.687  28 
  -1  19  -4 1487.38 461.767  31 
   1 -19   4 1435.80 359.752  27 
  -1  19  -5 724.275 377.743  31 
  -1 -19  -5 591.036 272.233  26 
   1 -19   5-294.824 426.315  27 
   1  19   5 693.716 309.657  28 
   1  19   5 638.504 259.140  34 
   1 -19   5 572.630 306.066   9 
  -1 -19  -5 637.502 293.802  32 
   1 -19   5 649.687 291.840  32 
  -1 -19  -6 100.505 222.632  32 
  -1  19  -6-120.937 311.218  31 
   1  19   6 155.083 246.078  28 
  -1  19  -6 474.677 395.124  20 
  -1 -19  -6 76.2665 247.838  26 
   1 -19   6-212.215 236.825  32 
   1  19   6 44.4307 217.156  34 
   1 -19   6 300.740 374.499   9 
   1 -19   6 294.404 308.229  27 
  -1  19  -7 3088.21 463.161  31 
  -1  19  -7 3507.59 593.806  20 
  -1  19  -7 3912.90 534.205  29 
   1  19   7 3830.20 478.122  28 
   1 -19   7 3552.22 526.537  27 
  -1 -19  -7 3373.04 470.183  26 
  -1 -19  -7 3551.76 463.152  32 
   1 -19   7 3791.72 504.575  32 
   1  19   7 3544.52 462.570  34 
   1 -19   7 3513.42 521.946   9 
   1 -19   8 501.291 241.225  32 
   1 -19   8 485.181 294.991  27 
  -1  19  -8 581.248 342.227  20 
  -1  19  -8 621.202 305.498  29 
   1  19   8 801.208 279.568  28 
  -1 -19  -8 817.844 259.359  18 
  -1 -19  -8 599.381 263.886  26 
  -1 -19  -8 508.225 219.374  32 
   1  19   8 624.752 250.612  34 
   1  19   9 2529.15 344.567  34 
   1 -19   9 1980.53 363.820  27 
   1  19   9 2890.31 344.970  28 
  -1  19  -9 2345.23 374.196  29 
  -1 -19  -9 2713.32 291.968  32 
  -1  19  -9 2509.13 410.452  17 
  -1  19  -9 2317.74 390.070  20 
  -1 -19  -9 2750.71 363.564  26 
  -1  19 -10-245.108 189.150  20 
   1 -19  10-120.004 190.159  27 
   1  19  10 33.4892 150.306  34 
   1  19  10-55.1866 130.054  28 
  -1  19 -10 184.973 193.015  17 
  -1 -19 -10 25.8220 152.988  26 
  -1  19 -10 10.3454 158.526  29 
  -1  20  10 271.746 159.611  34 
  -1  20  10 560.464 160.444  28 
   1 -20 -10 367.438 159.213  26 
  -1 -20  10 548.017 220.154  27 
   1  20 -10 545.835 205.160  20 
   1  20 -10 380.872 207.699  17 
   1 -20 -10 477.186 160.315  32 
   1  20 -10 319.003 189.440  29 
  -1  20   9 248.002 176.318  28 
  -1 -20   9-15.9549 231.981  27 
   1 -20  -9-192.882 192.848  26 
  -1  20   9-25.4306 195.848  34 
   1  20  -9 131.480 227.259  29 
   1  20  -9 213.435 239.056  20 
  -1  20   9-55.9965 128.695  30 
   1 -20  -9-33.4873 163.137  32 
  -1  20   8 3870.78 458.771  34 
  -1 -20   8 3818.75 509.710  32 
  -1  20   8 4111.03 440.789  28 
   1  20  -8 4205.54 530.921  29 
  -1 -20   8 3954.54 428.819   6 
  -1 -20   8 4441.96 540.033  27 
   1 -20  -8 4565.56 470.516  26 
  -1  20   8 4504.37 424.389  30 
   1  20  -8 3976.17 555.366  20 
   1 -20  -8 4207.49 465.080  32 
  -1  20   7-259.975 279.962  28 
  -1 -20   7-167.905 313.969   9 
  -1  20   7-22.8175 184.584  30 
  -1 -20   7 1.63116 239.955  32 
   1 -20  -7 153.518 221.018  26 
   1 -20  -7 191.512 248.724  32 
  -1  20   7-251.704 260.710  34 
  -1 -20   7-37.0249 259.530  27 
  -1 -20   7 262.004 265.984   6 
  -1  20   6-61.1799 265.689  34 
   1 -20  -6 169.448 220.971  26 
   1  20  -6-83.3940 296.013  31 
   1 -20  -6 317.730 291.637  32 
  -1  20   6-100.443 324.465  28 
  -1 -20   6-5.01333 254.297  27 
  -1 -20   6 0.57839 279.836  32 
  -1 -20   6-95.0376 299.884   9 
  -1  20   6-135.881 233.967  30 
  -1 -20   6-66.1986 246.149   6 
  -1 -20   5 363.947 256.448   6 
   1 -20  -5 670.569 286.878  26 
  -1  20   5 344.792 251.600  28 
  -1 -20   5 686.306 341.500   9 
   1 -20  -5 502.637 270.229  32 
  -1  20   5 187.609 246.739  34 
  -1 -20   5 718.484 340.819  32 
  -1 -20   5 582.087 322.071  27 
  -1  20   5 645.265 279.073  30 
   1  20  -5 833.542 376.477  31 
  -1  20   4-127.167 323.829  28 
   1 -20  -4 116.010 237.372  32 
  -1 -20   4 74.2850 242.347  32 
   1 -20  -4-10.6699 235.223  26 
  -1 -20   4 20.0664 246.327   6 
  -1 -20   4 460.220 326.634   9 
  -1  20   4 96.6909 212.132  34 
  -1 -20   4 173.808 271.353  27 
   1  20  -4-54.2235 288.273  31 
  -1  20   4 143.983 194.950  30 
  -1  20   3 1018.10 348.849  28 
   1 -20  -3 1042.96 331.364  32 
  -1 -20   3 1030.78 343.983  32 
  -1 -20   3 1007.84 331.478  26 
   1 -20  -3 893.316 318.418  26 
  -1 -20   3 795.229 340.685   9 
  -1 -20   3 856.624 297.809   6 
   1  20  -3 670.125 304.091  31 
  -1  20   3 937.553 336.136  34 
  -1  20   3 1518.66 369.453  31 
  -1  20   3 916.385 269.494  30 
  -1 -20   2 654.600 302.247   9 
   1 -20  -2 499.531 233.120   1 
  -1  20   2 858.852 332.115  28 
  -1 -20   2 323.825 248.613  26 
  -1 -20   2 723.100 309.192  40 
   1  20  -2 534.339 278.028  31 
  -1  20   2 731.386 287.500  34 
  -1  20   2 155.754 279.027  31 
  -1 -20   2 321.765 258.803  32 
   1 -20  -2 815.681 293.451  26 
  -1 -20   2 869.448 319.340  24 
  -1  20   2 501.833 253.336  30 
   1 -20  -2 832.718 310.126  32 
   1  20  -2 315.252 242.239  37 
  -1 -20   1 3041.78 495.953  26 
   1  20  -1 3322.16 519.904  31 
   1  20  -1 3366.28 511.105  37 
  -1 -20   1 3542.80 519.189  32 
  -1  20   1 3278.35 502.758  34 
  -1  20   1 3296.16 494.531  30 
   1 -20  -1 3572.39 489.056   1 
   1 -20  -1 4130.93 526.469  26 
   1 -20  -1 3572.37 529.119  40 
  -1 -20   1 3893.24 571.793  40 
  -1  20   1 3353.72 503.189  37 
  -1 -20   1 2962.02 468.228  24 
  -1  20   1 3581.10 527.958  28 
  -1  20   1 3284.49 492.160  31 
   1 -20  -1 3863.62 504.265  32 
  -1 -20   1 3615.72 506.894   9 
  -1  20   1 3710.35 517.047  22 
   1  20  -1 3360.91 498.480  21 
   1  20  -1 3261.66 471.827  28 
   1  20   0 310.170 288.140  31 
  -1  20   0 182.234 241.706  30 
   1  20   0 242.283 223.168  21 
  -1  20   0 35.1974 271.073  31 
  -1 -20   0 358.499 232.940   8 
   1  20   0 283.270 223.698  37 
  -1 -20   0 537.252 278.685  40 
  -1  20   0 520.887 288.917  28 
  -1 -20   0 194.182 246.552  26 
   1 -20   0 399.405 253.936  40 
   1 -20   0 384.665 248.558  32 
   1 -20   0 117.283 185.239   1 
  -1 -20   0 282.813 243.078   9 
  -1  20   0 70.1295 205.572  21 
  -1 -20   0 36.3801 205.719  32 
  -1  20   0 468.616 252.898  37 
   1 -20   0 89.6316 197.073  26 
   1  20   0 251.433 242.890  28 
  -1 -20   0 159.297 218.574  24 
  -1  20  -1 375.366 296.661  28 
  -1  20  -1 180.500 157.255  37 
   1  20   1 174.731 203.466  21 
   1 -20   1 44.4271 200.619  26 
  -1 -20  -1 99.0289 217.607  26 
  -1 -20  -1 352.692 272.216  40 
  -1  20  -1 354.241 222.450  39 
   1  20   1 119.228 254.130  28 
  -1  20  -1 121.366 212.025  21 
  -1  20  -1 747.145 430.691  31 
   1 -20   1 589.591 275.434  40 
   1 -20   1 483.149 291.205   9 
   1 -20   1 64.1901 208.590   1 
   1  20   1 222.728 206.502  37 
   1  20   1 856.795 350.718  31 
   1 -20   1 305.959 252.068  32 
  -1 -20  -1 366.406 288.160  32 
  -1 -20  -1 688.497 294.492  24 
   1 -20   2 185.526 218.709  26 
  -1  20  -2 106.976 241.215  28 
   1 -20   2 176.128 223.353  32 
   1 -20   2 1407.00 438.104  27 
   1 -20   2 338.121 261.635   9 
  -1  20  -2 598.825 364.173  31 
   1  20   2 317.353 238.799  28 
   1  20   2 161.412 259.738  31 
  -1 -20  -2 57.5746 242.100  26 
  -1 -20  -2 255.566 266.532  32 
  -1 -20  -3 76.0737 221.866  32 
   1 -20   3 71.4394 275.172   9 
  -1  20  -3 241.901 275.591  28 
   1  20   3 125.230 240.044  28 
   1 -20   3 447.759 322.978  27 
  -1 -20  -3 199.629 232.856  26 
   1 -20   3 318.163 247.103  32 
   1  20   3 588.901 250.653  31 
  -1  20  -3 304.630 347.952  31 
   1  20   3 256.726 217.554  34 
   1 -20   4 122.781 290.908   9 
   1  20   4 135.304 248.207  28 
  -1  20  -4 157.019 340.250  31 
   1 -20   4-142.506 362.805  27 
  -1 -20  -4 291.194 265.402  26 
   1  20   4 288.645 232.983  34 
  -1 -20  -4 232.131 240.493  32 
   1 -20   4 262.487 236.193  32 
   1 -20   5 480.686 261.876  32 
  -1  20  -5 1153.22 459.177  20 
  -1 -20  -5 961.341 317.399  32 
   1  20   5 907.645 327.081  28 
  -1 -20  -5 827.202 304.797  26 
   1 -20   5 781.974 349.732   9 
  -1  20  -5 497.308 334.965  31 
   1 -20   5-162.599 439.763  27 
   1  20   5 595.855 248.640  34 
  -1  20  -6 1001.16 334.572  29 
   1 -20   6 773.584 350.778   9 
   1  20   6 913.467 287.918  28 
  -1  20  -6 1027.67 431.421  20 
  -1  20  -6 774.050 355.729  31 
  -1 -20  -6 658.489 265.315  32 
   1  20   6 734.654 259.221  34 
   1 -20   6 1108.15 334.202  32 
  -1 -20  -6 808.909 303.560  26 
   1 -20   6 702.721 331.617  27 
   1 -20   7 1608.53 386.241   9 
  -1 -20  -7 1749.64 366.696  26 
   1  20   7 1614.39 333.503  34 
   1  20   7 1893.72 360.497  28 
  -1 -20  -7 2181.54 385.765  18 
  -1  20  -7 1216.61 415.000  20 
   1 -20   7 2051.02 411.651  27 
  -1  20  -7 1338.41 372.042  29 
  -1 -20  -7 1775.63 335.057  32 
  -1  20  -7 1912.20 394.185  31 
   1 -20   7 1879.56 384.147  32 
   1  20   8 496.192 234.268  34 
  -1  20  -8 691.717 332.249  20 
  -1 -20  -8 511.391 201.298  18 
  -1 -20  -8 413.172 182.023  32 
   1 -20   8 110.675 263.689  27 
  -1 -20  -8 328.300 221.922  26 
  -1  20  -8 274.497 226.090  29 
   1  20   8 651.017 252.718  28 
  -1  20  -9 8.79132 217.262  20 
  -1  20  -9 101.219 219.017  17 
  -1 -20  -9 109.797 127.565  32 
  -1  20  -9-8.45138 169.488  29 
  -1 -20  -9 73.8216 167.093  26 
   1  20   9-0.54176 158.944  28 
   1 -20   9-63.4157 243.808  27 
   1  20   9-2.08133 168.407  34 
   1  21  -9 9697.08 624.085  20 
  -1  21   9 9891.88 578.353  34 
  -1 -21   9 10323.7 669.241  27 
   1 -21  -9 9615.47 551.943  26 
  -1  21   9 10133.5 536.897  28 
   1  21  -9 10032.4 643.305  29 
   1 -21  -9 9978.12 555.474  32 
   1 -21  -8 5218.21 475.439  32 
  -1  21   8 5652.59 490.373  28 
   1 -21  -8 5114.28 467.881  26 
  -1  21   8 5443.12 423.548  30 
   1  21  -8 5193.77 571.762  20 
  -1 -21   8 4668.53 502.561  32 
  -1  21   8 4538.04 469.155  34 
  -1 -21   8 4932.90 533.560  27 
   1  21  -8 4757.82 538.421  29 
  -1 -21   7 791.596 314.808  32 
  -1 -21   7 678.688 343.184   9 
  -1  21   7 554.670 256.363  34 
  -1  21   7 1270.29 332.367  28 
  -1 -21   7 420.107 256.899  27 
   1  21  -7 1060.83 386.833  20 
   1 -21  -7 753.188 255.906  26 
   1 -21  -7 762.731 277.292  32 
  -1  21   7 796.026 218.304  30 
   1 -21  -6 1015.46 305.451  26 
   1 -21  -6 1109.04 316.075  32 
  -1 -21   6 717.968 311.135  32 
  -1 -21   6 990.523 383.110   9 
  -1  21   6 953.798 311.922  34 
  -1  21   6 971.485 319.058  28 
  -1 -21   6 877.453 275.763   6 
  -1 -21   6 863.342 319.486  27 
   1  21  -6 898.288 325.328  31 
  -1  21   6 935.855 285.801  30 
   1 -21  -5 2389.59 428.361  32 
  -1  21   5 2123.66 414.482  34 
  -1 -21   5 2442.61 453.160  32 
   1  21  -5 2667.80 507.525  31 
  -1 -21   5 3238.03 532.233   9 
  -1  21   5 3164.71 468.522  28 
   1 -21  -5 2846.76 433.337  26 
  -1 -21   5 2559.58 471.008  27 
  -1  21   5 2816.86 405.467  30 
  -1 -21   5 2353.63 394.678   6 
  -1 -21   4-94.3231 239.929   6 
  -1 -21   4 155.772 306.307   9 
   1  21  -4 327.410 331.070  31 
  -1  21   4 425.559 336.556  28 
  -1  21   4 23.1168 215.285  30 
  -1 -21   4 243.055 292.046  27 
   1 -21  -4 407.312 235.621  26 
  -1  21   4 248.913 253.707  34 
  -1 -21   4-155.198 250.230  32 
   1 -21  -4-17.0442 249.585  32 
   1 -21  -3 455.874 268.377  32 
  -1 -21   3 607.186 318.207   9 
  -1  21   3-93.4534 226.251  34 
   1  21  -3 70.0860 336.175  31 
  -1  21   3 613.854 338.804  31 
  -1  21   3 421.814 215.265  30 
  -1 -21   3 142.870 246.534  26 
  -1  21   3 512.194 322.826  28 
   1 -21  -3 48.1044 209.936  26 
  -1 -21   3 189.789 211.635   6 
  -1 -21   3 323.123 264.844  32 
  -1 -21   2 415.020 268.142  26 
   1  21  -2 172.058 285.071  31 
  -1  21   2 419.513 260.035  30 
  -1  21   2 588.403 287.224  28 
   1 -21  -2 700.545 303.302  26 
  -1  21   2 232.666 239.328  34 
  -1 -21   2 788.668 326.124  32 
  -1 -21   2 632.066 328.080   9 
   1 -21  -2 299.826 269.306  32 
  -1  21   2 1421.48 413.485  31 
  -1 -21   2 239.591 207.614   6 
  -1  21   1 113.004 264.551  28 
  -1  21   1 365.764 244.549  30 
  -1 -21   1-116.069 281.526   9 
   1  21  -1 167.522 225.171  28 
   1  21  -1-211.280 287.992  31 
  -1 -21   1 275.101 250.610  26 
  -1 -21   1 93.7095 251.975  32 
   1 -21  -1 318.401 272.630  26 
  -1  21   1 974.267 389.598  31 
   1 -21  -1 459.220 267.160  32 
   1  21   0 794.563 291.259  28 
  -1 -21   0 955.353 297.536   8 
   1 -21   0 985.114 332.586  32 
  -1  21   0 795.141 361.593  28 
  -1 -21   0 942.017 348.081   9 
  -1 -21   0 1159.99 364.102  26 
   1 -21   0 760.226 300.580  26 
   1  21   0 926.043 315.389  31 
  -1  21   0 2300.83 514.322  31 
   1 -21   0 950.755 333.582   9 
  -1 -21   0 819.799 341.933  32 
  -1  21  -1 160.724 258.175  28 
   1  21   1 151.092 287.241  28 
   1 -21   1 104.935 276.874   9 
   1 -21   1 322.645 223.580  26 
  -1 -21  -1 183.329 245.509  26 
   1  21   1 5.31510 258.569  31 
  -1 -21  -1 17.7971 221.075  32 
   1 -21   1-54.2318 240.915  32 
  -1 -21  -1 661.021 307.668   9 
  -1  21  -1 761.218 431.953  31 
   1 -21   2 1862.26 433.155  27 
   1  21   2 1186.42 336.544  31 
  -1  21  -2 1258.29 388.664  28 
   1 -21   2 1432.64 391.615   9 
   1 -21   2 1672.62 364.567  26 
   1  21   2 982.223 311.949  28 
  -1 -21  -2 1244.43 329.352  26 
   1 -21   2 942.775 325.776  32 
  -1 -21  -2 1391.37 370.238  32 
  -1  21  -2 1253.09 426.677  31 
   1  21   3 92.2277 269.679  28 
   1 -21   3-240.029 311.110  27 
  -1 -21  -3-179.340 231.024  32 
  -1  21  -3 428.809 367.237  31 
  -1  21  -3-291.470 293.615  28 
   1  21   3-74.8433 230.870  31 
  -1 -21  -3 238.566 276.599  26 
   1 -21   3 104.186 231.812  32 
   1  21   3 84.2754 195.466  34 
   1 -21   3 51.2879 272.340   9 
   1 -21   4 6190.76 615.664  27 
  -1 -21  -4 7484.08 683.210  32 
   1  21   4 6902.81 664.531  28 
  -1 -21  -4 6966.79 684.355  26 
   1 -21   4 7535.44 729.211   9 
   1 -21   4 6849.13 665.054  32 
  -1  21  -4 6138.04 751.403  31 
   1  21   4 6629.25 609.687  34 
   1  21   5 998.345 293.904  34 
  -1  21  -5 960.717 390.700  31 
  -1  21  -5 1178.74 445.553  20 
   1  21   5 1185.02 343.032  28 
   1 -21   5 107.591 315.549  27 
   1 -21   5 924.527 334.597  32 
  -1 -21  -5 1022.29 295.174  32 
  -1 -21  -5 1128.83 360.360  26 
   1 -21   5 779.581 382.715   9 
   1 -21   6 2920.51 443.822  32 
  -1  21  -6 3734.50 582.667  20 
   1 -21   6 2681.34 490.518   9 
  -1  21  -6 3379.43 483.073  29 
  -1 -21  -6 3442.34 463.493  26 
   1  21   6 3619.02 477.344  28 
   1 -21   6 4027.04 536.059  27 
   1  21   6 3347.03 442.915  34 
  -1 -21  -6 3323.48 422.946  32 
  -1  21  -6 3533.13 503.546  31 
   1 -21   7-50.9058 248.486  27 
  -1 -21  -7 4.86756 171.634  32 
   1 -21   7-14.2606 284.145   9 
  -1 -21  -7 82.5626 195.448  18 
  -1  21  -7 190.210 224.060  31 
   1 -21   7 294.512 198.199  32 
  -1  21  -7-104.688 223.473  29 
  -1 -21  -7-13.9913 242.701  26 
   1  21   7-30.2720 230.754  28 
  -1  21  -7 215.310 317.683  20 
   1  21   7 98.6092 196.681  34 
  -1  21  -8 936.332 319.355  20 
   1  21   8 1165.13 259.541  28 
  -1  21  -8 1100.95 272.468  29 
   1  21   8 916.371 228.867  34 
   1 -21   8 859.837 289.217  27 
  -1 -21  -8 1127.24 274.898  26 
  -1 -21  -8 1085.41 223.513  18 
  -1  21  -8 1349.75 322.870  17 
  -1 -21  -8 947.043 200.788  32 
  -1  21  -9 11.0604 148.033  29 
  -1  21  -9-73.0611 190.035  20 
  -1  21  -9 79.3217 183.783  17 
   1  21   9-296.559 161.673  28 
   1 -21   9-113.606 186.752  27 
  -1 -21  -9 139.379 153.525  26 
   1  21   9-164.817 151.106  34 
  -1 -21  -9-62.0862 106.575  32 
   1  22  -9 17037.2 775.109  17 
  -1  22   9 14832.4 641.231  34 
   1  22  -9 15285.1 701.135  29 
  -1  22   9 15865.6 607.929  28 
  -1 -22   9 16104.9 745.986  27 
   1 -22  -9 15603.8 626.145  26 
   1 -22  -9 15819.0 616.896  32 
   1  22  -9 15585.7 693.081  20 
  -1 -22   8 177.187 212.158  32 
   1  22  -8 459.642 288.018  20 
  -1  22   8 464.875 215.045  28 
  -1  22   8 77.5713 203.521  34 
  -1 -22   8 82.7778 204.181  27 
   1  22  -8 496.640 257.251  29 
   1 -22  -8 279.974 174.051  26 
   1 -22  -8 169.862 193.089  32 
   1 -22  -7 12022.3 709.240  32 
  -1  22   7 12461.9 637.235  30 
   1  22  -7 11695.2 817.797  29 
  -1 -22   7 11240.7 766.135  27 
   1  22  -7 10969.2 705.473  31 
   1 -22  -7 11002.2 681.733  26 
  -1  22   7 10929.6 726.430  34 
   1  22  -7 11696.0 836.352  20 
  -1  22   7 11688.6 712.316  28 
  -1 -22   7 11882.0 791.679   9 
  -1 -22   7 10225.6 737.753  32 
  -1 -22   6 791.612 354.329   9 
  -1  22   6 1144.59 264.984  30 
  -1  22   6 1235.18 329.904  28 
   1  22  -6 947.983 320.229  31 
   1 -22  -6 1050.60 275.432  26 
   1 -22  -6 694.946 275.047  32 
  -1 -22   6 995.608 325.477  32 
  -1 -22   6 502.223 288.261  27 
  -1  22   6 878.631 296.956  34 
  -1 -22   5 566.165 302.285  27 
   1  22  -5 335.850 297.452  31 
  -1 -22   5 225.904 298.646   9 
  -1  22   5 523.606 325.320  28 
  -1 -22   5 125.572 296.507  32 
  -1  22   5 11.0297 184.341  30 
   1 -22  -5 66.5183 234.419  32 
  -1  22   5 37.8668 230.965  34 
   1 -22  -5 340.695 242.995  26 
  -1 -22   4 233.885 311.308   9 
  -1  22   4 141.780 291.255  28 
  -1 -22   4 42.1534 250.268  32 
  -1  22   4-20.1986 209.561  30 
  -1  22   4 108.926 244.625  34 
   1  22  -4-84.1151 322.814  31 
   1 -22  -4 110.845 259.695  32 
   1 -22  -4 49.8554 214.685  26 
  -1 -22   4 322.270 264.612  27 
   1  22  -3 1335.36 422.650  31 
  -1  22   3 912.736 275.426  30 
  -1 -22   3 1153.08 378.550   9 
  -1  22   3 595.688 251.750  28 
  -1  22   3 1157.09 353.499  31 
  -1 -22   3 1231.03 380.515  32 
  -1  22   3 694.412 269.601  34 
   1 -22  -3 795.359 283.320  26 
   1 -22  -3 771.341 306.822  32 
  -1  22   2 447.898 240.021  30 
   1  22  -2-79.7471 339.481  31 
  -1 -22   2 491.254 319.842   9 
  -1  22   2 548.661 320.241  28 
  -1  22   2 1015.66 382.280  31 
  -1 -22   2 341.704 292.606  26 
   1 -22  -2 557.662 281.258  26 
  -1 -22   2 586.577 302.287  32 
   1 -22  -2 507.299 279.402  32 
   1 -22  -1 8596.18 743.168  32 
   1 -22  -1 11890.6 875.587   9 
  -1  22   1 7547.26 736.839  28 
   1  22  -1 9356.53 773.059  28 
   1  22  -1 8754.37 767.849  31 
  -1 -22   1 8524.98 766.835  26 
  -1  22   1 10510.7 863.682  31 
   1 -22  -1 9354.19 773.249  26 
  -1 -22   1 9575.08 798.884  32 
  -1 -22   1 9828.51 819.621   9 
   1  22   0 1419.93 367.752  28 
  -1  22   0 1240.09 381.098  28 
   1 -22   0 2155.36 449.619   9 
   1 -22   0 1436.81 363.065  26 
  -1 -22   0 1025.63 326.262  26 
  -1 -22   0 1672.11 403.703  32 
   1 -22   0 1671.49 388.824  32 
   1  22   0 1567.60 376.861  31 
  -1 -22   0 1790.41 406.953   9 
  -1  22   0 1998.45 508.271  31 
  -1 -22  -1-117.748 266.570  32 
  -1  22  -1 830.828 402.617  31 
   1  22   1 108.828 275.410  31 
   1 -22   1 920.802 384.578  27 
  -1  22  -1 168.886 290.842  28 
   1 -22   1-145.240 246.464  32 
   1  22   1 30.3295 244.826  28 
   1 -22   1 161.592 256.873  26 
  -1 -22  -1 157.615 257.690  26 
   1 -22   1 50.8669 302.991   9 
  -1 -22  -1-79.4025 246.985   9 
   1 -22   2 108.903 240.149  32 
   1  22   2 559.822 283.355  31 
   1  22   2 893.521 315.342  28 
  -1 -22  -2 920.430 348.090   9 
  -1 -22  -2 731.567 312.148  32 
  -1  22  -2 323.946 271.244  28 
   1 -22   2 520.509 313.386  27 
  -1  22  -2 699.357 422.865  31 
  -1 -22  -2 675.634 324.228  26 
   1 -22   2 535.964 305.845   9 
  -1  22  -3 24737.6 1227.00  28 
   1  22   3 25502.7 1119.57  31 
  -1  22  -3 21166.3 1275.86  31 
   1  22   3 23545.4 1140.14  28 
   1  22   3 24945.9 1135.20  34 
  -1 -22  -3 23800.8 1166.17  32 
   1 -22   3 23357.1 1158.89  27 
   1 -22   3 22172.8 1159.43  32 
   1 -22   3 22555.5 1182.89   9 
  -1 -22  -3 22756.2 1150.01  26 
   1  22   4 585.452 255.957  34 
  -1 -22  -4 351.071 256.080  32 
  -1  22  -4 99.9569 336.799  31 
   1  22   4 189.139 255.364  28 
   1 -22   4 818.378 376.698   9 
   1 -22   4 408.281 280.700  32 
  -1 -22  -4 215.632 253.217  26 
  -1  22  -5 12030.5 902.469  31 
   1  22   5 13363.9 821.084  28 
  -1  22  -5 12608.0 963.265  20 
  -1 -22  -5 13414.4 834.788  26 
   1 -22   5 13017.6 900.124   9 
  -1 -22  -5 13126.7 821.665  32 
   1  22   5 12456.7 776.789  34 
   1 -22   5 13673.7 870.685  27 
   1 -22   5 11870.6 823.707  32 
  -1 -22  -6 487.901 259.507  18 
   1 -22   6 93.4781 275.816   9 
   1  22   6 7.85410 234.614  28 
  -1  22  -6 79.4457 317.006  20 
  -1  22  -6-59.0777 196.617  29 
   1 -22   6 100.418 207.532  32 
   1 -22   6 350.785 279.605  27 
  -1 -22  -6 209.000 223.695  32 
  -1 -22  -6 185.466 237.908  26 
   1  22   6-83.2057 200.005  34 
  -1  22  -6-16.5702 244.666  31 
  -1  22  -7 1182.06 279.363  29 
  -1  22  -7 1350.48 283.379  31 
   1  22   7 1158.83 251.311  34 
  -1 -22  -7 1378.96 279.785  18 
   1  22   7 1489.33 310.611  28 
   1 -22   7 1463.31 336.443  27 
   1 -22   7 884.347 253.537  32 
  -1  22  -7 1095.23 348.049  20 
   1 -22   7 1075.32 330.312   9 
  -1 -22  -7 1468.69 297.862  26 
  -1 -22  -7 1304.01 246.177  32 
   1  22   8 934.258 222.863  28 
   1 -22   8 861.020 251.853  27 
  -1 -22  -8 943.634 229.006  26 
  -1 -22  -8 861.143 172.952  32 
  -1  22  -8 452.444 239.184  20 
  -1  22  -8 852.326 238.396  17 
  -1  22  -8 965.882 224.417  29 
  -1 -22  -8 976.526 193.461  18 
   1  22   8 889.114 203.887  34 
  -1 -23   8 35792.1 1111.36  32 
   1 -23  -8 36533.3 989.788  32 
   1  23  -8 35709.7 1145.10  20 
   1  23  -8 36184.3 1118.95  29 
  -1  23   8 35342.6 986.695  28 
  -1 -23   8 35920.5 1138.24  27 
  -1  23   8 34439.1 1019.28  34 
   1 -23  -8 36473.2 980.764  26 
   1 -23  -8 33585.3 976.459  18 
  -1  23   7 296.870 247.334  28 
   1  23  -7 540.611 319.470  20 
  -1  23   7 69.8627 195.453  34 
   1  23  -7 384.924 261.797  29 
  -1 -23   7-169.622 222.172  27 
   1  23  -7 359.969 202.348  31 
  -1 -23   7 129.166 206.170  32 
   1 -23  -7 193.885 171.946  26 
   1 -23  -7 112.841 196.122  32 
  -1  23   6 766.339 323.748  28 
  -1 -23   6 63.8468 281.945   9 
   1  23  -6 533.091 282.368  31 
   1 -23  -6 271.861 236.025  32 
  -1 -23   6 185.852 236.879  27 
  -1 -23   6 385.039 264.188  32 
  -1  23   6 336.474 230.487  34 
   1 -23  -6 531.226 234.066  26 
   1  23  -5 1511.43 382.498  31 
  -1 -23   5 1358.18 357.389   9 
   1 -23  -5 1603.00 372.073  32 
  -1  23   5 1158.16 320.117  34 
  -1 -23   5 1357.09 331.202  27 
   1 -23  -5 1446.57 310.107  26 
  -1  23   5 1343.38 275.720  30 
  -1 -23   5 1120.13 337.174  32 
  -1  23   5 2125.87 412.395  28 
  -1  23   4 1384.05 376.869  28 
   1 -23  -4 1542.18 365.911  32 
   1 -23  -4 1189.34 306.583  26 
  -1  23   4 1753.58 331.977  30 
  -1 -23   4 1177.40 361.009  32 
   1  23  -4 1235.11 388.639  31 
  -1  23   4 1065.54 315.129  34 
  -1 -23   4 1664.94 367.970  27 
  -1 -23   4 1643.08 419.915   9 
  -1  23   3 317.015 302.388  28 
  -1 -23   3 433.469 323.764   9 
  -1  23   3-207.370 281.163  34 
  -1 -23   3 184.910 273.556  32 
   1  23  -3 499.293 377.248  31 
   1 -23  -3 131.119 218.055  26 
  -1  23   3 454.814 299.055  31 
   1 -23  -3 17.2610 240.478  32 
  -1  23   3 493.457 236.773  30 
   1  23  -2 682.886 369.251  31 
  -1 -23   2 1030.03 342.875  32 
  -1  23   2 956.818 282.142  30 
  -1  23   2 1847.87 438.379  31 
  -1  23   2 789.134 325.388  28 
  -1 -23   2 1287.26 359.482   9 
   1 -23  -2 1216.75 332.525  26 
  -1 -23   2 1035.61 352.721  26 
   1 -23  -2 1478.07 404.228  32 
   1  23  -1 471.362 295.615  28 
  -1  23   1 228.723 279.187  28 
   1 -23  -1 501.612 318.148  32 
  -1 -23   1 664.502 311.123  32 
  -1 -23   1 399.280 272.888  26 
   1 -23  -1 654.067 348.481   9 
  -1  23   1 484.996 325.234  31 
  -1 -23   1 338.872 282.483   9 
   1 -23  -1 324.945 252.855  26 
   1  23  -1 34.9459 365.502  31 
   1 -23   0 20592.3 1107.77  26 
   1  23   0 18675.8 1054.25  28 
   1  23   0 20723.7 1113.00  31 
  -1  23   0 18063.8 1105.87  28 
  -1 -23   0 21243.2 1141.79   9 
   1 -23   0 21904.5 1179.42   9 
  -1 -23   0 18807.1 1092.63  26 
   1 -23   0 20682.0 1117.73  32 
  -1 -23   0 18839.4 1108.72  32 
  -1  23   0 21965.5 1204.13  31 
  -1  23  -1 6249.33 720.573  31 
   1 -23   1 5258.38 602.667  32 
   1 -23   1 5367.60 613.431  26 
  -1  23  -1 5359.01 635.722  28 
   1  23   1 5306.45 596.365  28 
  -1 -23  -1 5975.64 627.254   9 
  -1 -23  -1 5521.21 612.462  26 
   1 -23   1 5177.41 620.811   9 
  -1 -23  -1 5769.29 646.212  32 
   1  23   1 6157.19 628.387  31 
   1 -23   1 6138.53 599.548  27 
  -1 -23  -2 21519.2 1079.37   9 
   1  23   2 19049.4 1003.74  31 
  -1 -23  -2 18230.4 1029.31  32 
  -1  23  -2 17816.0 1083.18  28 
   1 -23   2 17886.8 986.907  27 
  -1  23  -2 18731.7 1154.98  31 
  -1 -23  -2 17288.1 1008.15  26 
   1  23   2 17444.6 1002.65  28 
   1 -23   2 15604.6 970.092  32 
   1 -23   2 16960.5 1040.32   9 
   1 -23   3 315.481 259.894  32 
  -1  23  -3-74.9361 338.769  31 
   1  23   3 201.959 285.188  28 
  -1 -23  -3 513.940 268.178   9 
   1 -23   3-618.035 407.708  27 
   1  23   3-232.669 260.563  31 
  -1  23  -3 148.506 270.710  28 
   1 -23   3-107.500 304.902   9 
  -1 -23  -3 330.563 292.256  32 
  -1 -23  -3 135.116 257.791  26 
  -1  23  -4 31304.8 1397.28  20 
  -1 -23  -4 31237.0 1269.39  32 
   1 -23   4 32662.7 1311.60  27 
   1  23   4 30154.3 1235.32  28 
   1 -23   4 30870.5 1282.69  32 
  -1  23  -4 30672.6 1415.76  31 
   1 -23   4 32603.4 1353.97   9 
  -1 -23  -4 29853.6 1251.21  26 
   1  23   4 30864.3 1175.63  34 
   1  23   5 2063.27 395.281  28 
  -1  23  -5 1640.86 400.858  31 
  -1 -23  -5 1910.50 368.347  26 
  -1  23  -5 1398.28 333.755  29 
   1 -23   5 2173.27 446.413   9 
   1 -23   5 1775.12 366.202  32 
  -1 -23  -5 2002.20 366.820  32 
   1 -23   5 2223.40 425.900  27 
  -1  23  -5 1946.51 451.922  20 
   1  23   5 1324.16 285.093  34 
   1 -23   6 3603.74 451.654  27 
   1 -23   6 3023.95 447.074   9 
  -1  23  -6 2720.19 407.598  31 
  -1  23  -6 3378.46 506.778  20 
   1  23   6 3059.92 411.323  28 
  -1 -23  -6 3324.50 408.903  26 
  -1 -23  -6 3242.32 437.897  18 
  -1  23  -6 2659.49 364.677  29 
   1 -23   6 2405.18 370.802  32 
  -1 -23  -6 3447.11 390.871  32 
   1  23   6 2700.64 343.590  34 
  -1 -23  -7 30.4569 144.639  32 
  -1  23  -7-268.551 213.489  31 
  -1  23  -7 17.6010 250.604  20 
   1  23   7 33.8261 137.208  34 
  -1  23  -7 33.9356 165.706  29 
  -1 -23  -7-28.5916 156.411  18 
   1  23   7 266.391 194.350  28 
   1 -23   7-322.661 239.581  27 
  -1  23  -7 263.251 216.344  17 
   1 -23   7-280.586 274.013   9 
   1 -23   7 183.081 168.033  32 
  -1 -23  -7 192.234 194.284  26 
   1 -23   8 6.03354 175.004  27 
  -1 -23  -8 137.358 107.480  32 
  -1 -23  -8-102.123 118.540  18 
  -1  23  -8-107.354 123.850  29 
   1  23   8-56.6502 128.290  28 
  -1  23  -8 56.4219 141.998  17 
  -1  23  -8-76.3143 198.868  20 
  -1 -23  -8 30.4743 132.701  26 
   1  23   8 28.8172 110.301  34 
   1  24  -7 28568.5 1085.57  20 
   1  24  -7 28514.6 1015.81  29 
  -1 -24   7 28847.1 1019.62  27 
   1 -24  -7 28796.5 929.791  32 
   1 -24  -7 28099.5 884.634  26 
  -1  24   7 27511.0 931.689  34 
  -1 -24   7 27926.7 1015.13  32 
  -1  24   7 27718.4 944.554  28 
  -1 -24   6 5002.36 504.535   9 
  -1  24   6 4130.12 431.411  34 
   1  24  -6 4221.26 459.385  31 
  -1  24   6 5102.48 491.327  28 
  -1 -24   6 4783.31 469.979  27 
  -1 -24   6 4057.70 475.219  32 
   1 -24  -6 4496.33 413.593  26 
   1 -24  -6 4811.46 452.679  32 
   1  24  -6 4925.15 569.332  20 
  -1 -24   5 2075.66 387.026  32 
   1  24  -5 2034.88 422.416  31 
  -1 -24   5 2346.06 400.343   9 
  -1  24   5 2269.03 397.051  28 
  -1  24   5 2157.73 361.742  34 
  -1 -24   5 1805.24 315.198  27 
   1 -24  -5 2099.74 333.673  26 
   1 -24  -5 2592.17 406.049  32 
  -1 -24   4 55.2447 263.694   9 
   1 -24  -4 23.3571 201.504  26 
  -1  24   4 182.218 271.203  28 
  -1 -24   4 165.287 269.172  32 
   1  24  -4-79.8872 291.257  31 
   1 -24  -4 361.129 271.259  32 
  -1 -24   3 2081.10 431.851  32 
  -1 -24   3 2360.35 457.857   9 
  -1  24   3 1478.59 365.696  28 
   1 -24  -3 2598.35 463.091  32 
  -1  24   3 2072.55 389.615  31 
   1 -24  -3 2118.79 379.931  26 
   1  24  -3 2128.66 460.999  31 
   1 -24  -3 3108.09 458.491   9 
  -1 -24   2 3104.89 500.067   9 
   1  24  -2 3821.52 585.335  31 
  -1  24   2 2797.56 461.856  31 
   1 -24  -2 3524.18 503.934   9 
  -1  24   2 2205.23 425.892  28 
   1 -24  -2 3558.67 498.309  32 
   1 -24  -2 2966.40 447.992  26 
  -1 -24   2 3067.41 500.218  32 
   1  24  -1 12585.1 885.153  31 
  -1  24   1 9493.61 794.195  28 
  -1 -24   1 11037.8 838.637  32 
  -1  24   1 12200.0 876.450  31 
  -1 -24   1 12561.7 930.692  18 
   1  24  -1 11356.0 801.121  28 
  -1 -24   1 11213.9 843.380   9 
   1 -24  -1 11531.9 848.528   9 
   1 -24  -1 11768.1 822.683  26 
   1 -24  -1 10749.5 816.683  32 
  -1 -24   1 10135.0 804.105  26 
   1 -24   0 38.6311 265.017  32 
  -1  24   0 372.191 354.160  31 
  -1  24   0-439.095 339.335  28 
  -1 -24   0 234.847 258.169  26 
   1 -24   0 51.7279 301.023   9 
   1  24   0-662.165 398.455  31 
   1  24   0 110.860 266.873  28 
   1 -24   0 8.46860 221.195  26 
  -1 -24   0 45.6443 303.302  32 
  -1 -24   0 216.670 284.145   9 
  -1  24  -1 759.001 322.549  28 
   1 -24   1 473.405 289.582  32 
   1  24   1 704.980 303.869  28 
   1  24   1 329.642 279.461  31 
   1 -24   1 745.326 341.545   9 
  -1 -24  -1 630.438 286.118   9 
  -1  24  -1 650.961 382.229  31 
  -1 -24  -1 528.453 287.311  26 
   1 -24   1-233.583 324.736  27 
  -1 -24  -1 618.466 315.820  32 
   1  24   2 4738.35 520.969  31 
  -1 -24  -2 4645.67 573.130  32 
   1 -24   2 4547.33 579.686   9 
  -1  24  -2 3969.01 542.548  28 
  -1 -24  -2 3862.09 511.365  26 
  -1  24  -2 4395.93 608.501  31 
   1 -24   2 4483.39 540.935  32 
  -1 -24  -2 5318.71 543.600   9 
   1 -24   2 3753.30 450.618  27 
   1  24   2 4006.93 510.086  28 
   1  24   3 35625.9 1247.65  31 
  -1  24  -3 31204.1 1406.30  31 
   1 -24   3 34275.4 1403.60   9 
  -1 -24  -3 33364.8 1291.90  32 
   1  24   3 32895.7 1269.27  28 
   1 -24   3 32761.7 1252.27  27 
  -1 -24  -3 32309.4 1276.84  26 
   1 -24   3 31634.1 1294.10  32 
  -1  24  -3 34517.9 1394.55  20 
   1 -24   4 116.884 306.394   9 
  -1  24  -4 104.359 331.948  31 
   1  24   4 230.942 298.704  28 
   1 -24   4 549.699 269.062  27 
  -1 -24  -4 36.0726 239.988  26 
  -1 -24  -4 389.741 278.206  32 
   1 -24   4 34.3415 220.488  32 
   1  24   4 26.0979 170.071  34 
  -1  24  -4 542.290 355.412  20 
   1  24   5 17785.1 872.250  28 
  -1 -24  -5 17550.1 862.604  26 
   1  24   5 16786.8 779.368  34 
   1 -24   5 16669.4 870.989  32 
  -1 -24  -5 17429.5 939.399  18 
  -1 -24  -5 18321.1 852.438  32 
  -1  24  -5 16516.2 939.311  31 
  -1  24  -5 17342.2 961.174  20 
   1 -24   5 18064.8 957.401   9 
  -1  24  -5 16263.1 830.296  29 
   1 -24   5 19814.6 952.182  27 
   1 -24   6 1059.83 335.577   9 
   1 -24   6 1105.86 255.070  32 
  -1  24  -6 1007.97 311.195  20 
  -1 -24  -6 1326.58 287.206  18 
  -1  24  -6 1250.06 248.717  29 
   1  24   6 1434.96 289.541  28 
  -1 -24  -6 1264.65 266.508  26 
   1  24   6 1090.68 215.842  34 
   1 -24   6 1141.42 288.789  27 
  -1  24  -6 987.078 271.236  31 
  -1 -24  -6 1310.49 237.770  32 
  -1 -24  -7 581.234 152.097  32 
  -1  24  -7 548.526 227.587  20 
  -1  24  -7 526.580 170.790  31 
  -1  24  -7 396.721 168.301  17 
  -1 -24  -7 616.058 173.585  18 
   1 -24   7 374.273 187.994  27 
  -1 -24  -7 731.812 198.930  26 
   1  24   7 742.675 173.544  34 
  -1  24  -7 396.534 147.023  29 
   1  24   7 813.989 209.255  28 
  -1  25   6 2992.73 366.403  28 
   1 -25  -6 3718.65 340.716   9 
   1  25  -6 3613.62 452.938  20 
   1 -25  -6 3892.98 387.986  32 
   1 -25  -6 2852.92 308.391  26 
  -1 -25   6 3110.49 376.286  32 
   1  25  -6 3394.31 386.156  29 
   1  25  -6 2872.81 357.230  31 
  -1 -25   6 3009.67 340.159  27 
  -1 -25   6 2939.58 387.964   9 
  -1 -25   5 1342.63 323.904   9 
   1 -25  -5 1713.68 313.291   9 
   1  25  -5 1318.45 370.883  20 
  -1  25   5 1316.79 320.087  28 
   1 -25  -5 1710.25 337.672  32 
  -1 -25   5 1325.94 257.401  27 
   1 -25  -5 895.874 226.812  26 
  -1 -25   5 1346.14 317.986  32 
   1  25  -5 1144.31 311.499  31 
   1 -25  -4 3311.70 421.330  32 
   1 -25  -4 3438.27 418.701   9 
  -1 -25   4 2718.69 438.079  32 
  -1  25   4 2730.75 431.843  28 
  -1 -25   4 2886.49 429.400   9 
   1 -25  -4 2203.74 335.792  26 
   1  25  -4 2717.95 459.713  31 
   1  25  -3 1949.34 436.094  31 
  -1 -25   3 2281.28 404.929   9 
   1 -25  -3 2237.62 394.990  32 
  -1 -25   3 1672.28 398.735  32 
  -1  25   3 1849.34 393.069  28 
   1 -25  -3 1693.75 324.848  26 
   1 -25  -3 2702.92 405.716   9 
  -1  25   3 1469.48 299.244  31 
  -1 -25   2 810.068 356.603  32 
   1  25  -2 807.356 366.217  31 
  -1  25   2 325.497 276.264  28 
   1 -25  -2 996.788 307.246  26 
   1 -25  -2 720.280 324.545   9 
  -1  25   2 560.736 281.291  31 
  -1 -25   2 795.969 314.716   9 
   1 -25  -2 785.265 298.707  32 
   1 -25  -1 938.163 316.116  32 
   1 -25  -1 470.886 249.023  26 
  -1  25   1 150.492 276.080  28 
  -1  25   1 1056.48 355.261  31 
  -1 -25   1 340.930 262.479   9 
   1  25  -1 707.855 269.425  28 
   1  25  -1 1296.74 428.717  31 
  -1 -25   1 846.186 330.100  18 
  -1 -25   1 210.738 238.316  26 
   1 -25  -1 1096.64 362.960   9 
  -1 -25   1 268.907 295.180  32 
   1 -25   0 395.929 278.934  32 
   1  25   0 1298.64 390.105  31 
  -1 -25   0 135.672 235.426   9 
   1 -25   0 95.8400 287.465   9 
   1  25   0 332.990 247.032  28 
  -1 -25   0 526.627 323.303  18 
  -1  25   0-1.60599 240.234  28 
  -1 -25   0 21.7868 316.731  32 
  -1  25   0 564.931 357.504  31 
  -1 -25   0-38.8073 245.224  26 
   1 -25   0 353.519 220.858  26 
  -1  25  -1 84.2815 241.533  28 
   1 -25   1-4.05202 287.833  32 
   1  25   1 127.990 246.945  28 
  -1  25  -1-47.4285 306.234  31 
  -1 -25  -1-12.2502 264.470   9 
   1  25   1 487.535 333.510  31 
  -1 -25  -1-82.4674 260.623  26 
   1 -25   1-92.5718 286.282   9 
  -1 -25  -1-22.9676 263.375  32 
  -1  25  -1 380.186 234.983  20 
   1  25   2 3857.46 484.787  31 
  -1  25  -2 3591.61 535.868  31 
  -1 -25  -2 4213.50 456.500   9 
  -1 -25  -2 3609.96 479.405  32 
  -1 -25  -2 3593.24 473.985  26 
   1 -25   2 3671.16 482.598  32 
  -1  25  -2 4144.60 493.947  20 
   1 -25   2 3442.40 496.861   9 
   1 -25   2 2636.18 348.702  27 
  -1  25  -2 2894.05 458.361  28 
   1  25   2 3192.28 443.168  28 
  -1 -25  -3 4054.44 495.419  32 
   1 -25   3 4551.70 472.612  27 
  -1  25  -3 4154.43 507.998  20 
   1  25   3 3080.07 418.660  28 
  -1  25  -3 3160.08 495.019  31 
   1  25   3 3990.94 429.257  31 
   1 -25   3 3953.18 518.033   9 
  -1 -25  -3 3293.08 446.569  26 
  -1 -25  -3 4344.50 563.839  18 
   1 -25   3 3226.47 443.726  32 
   1 -25   4 23494.9 1014.52  32 
  -1  25  -4 22271.3 1074.74  31 
  -1 -25  -4 26413.7 1022.09  32 
  -1  25  -4 24216.1 1066.05  20 
  -1 -25  -4 23523.9 1001.44  26 
   1 -25   4 26229.6 1109.83   9 
  -1 -25  -4 24067.1 1135.16  18 
   1 -25   4 25925.9 1037.19  27 
   1  25   4 23974.2 997.012  28 
  -1  25  -5 695.148 287.344  20 
  -1 -25  -5 1375.44 269.590  32 
   1 -25   5 729.494 240.922  27 
   1 -25   5 988.189 314.484   9 
   1  25   5 1043.66 276.843  28 
   1 -25   5 775.018 230.873  32 
  -1  25  -5 676.616 281.812  31 
  -1 -25  -5 838.644 245.221  26 
  -1 -25  -5 1035.87 293.416  18 
   1 -25   6 117.438 123.822  32 
  -1  25  -6 62.6094 163.833  31 
   1 -25   6 491.043 225.870   9 
   1  25   6 419.483 200.486  28 
   1 -25   6 162.128 172.084  27 
  -1  25  -6 279.197 161.745  17 
  -1  25  -6 9.44841 111.574  29 
  -1 -25  -6 359.124 158.995  32 
  -1 -25  -6 250.286 164.641  18 
  -1 -25  -6 328.214 167.935  26 
  -1  25  -6 179.941 203.897  20 
  -1  26   5 247.616 193.060  28 
  -1 -26   5 189.526 183.936  32 
   1 -26  -5 556.617 219.127  32 
   1 -26  -5 461.431 186.122   9 
  -1 -26   5 65.1833 183.429   9 
   1  26  -5 195.261 205.208  31 
   1 -26  -5 353.431 168.467  26 
   1  26  -5 380.449 248.976  20 
   1 -26  -4 906.840 240.700   9 
   1  26  -4 292.085 244.258  31 
  -1 -26   4 673.126 266.877   9 
  -1 -26   4 263.895 261.238  32 
   1 -26  -4 497.892 190.476  26 
   1 -26  -4 794.482 250.626  32 
  -1  26   4 326.191 232.264  28 
   1  26  -4 949.277 305.575  20 
  -1 -26   3 39.9018 230.581  32 
  -1  26   3-245.118 261.451  28 
   1 -26  -3 67.9849 222.992  32 
   1  26  -3-305.523 291.086  31 
  -1 -26   3 95.2658 210.377   9 
   1 -26  -3 64.5074 174.816  26 
   1 -26  -3 175.944 223.829   9 
  -1 -26   2 854.454 346.336  32 
  -1  26   2 147.137 288.358  28 
  -1 -26   2 603.280 277.173   9 
  -1  26   2 601.163 237.572  31 
   1 -26  -2 550.793 266.219  32 
   1 -26  -2 659.685 235.233  26 
   1  26  -2 518.820 318.042  31 
   1 -26  -2 913.447 310.713   9 
   1  26  -1 963.822 275.171  28 
   1  26  -1 1727.38 416.512  31 
  -1 -26   1 1089.13 294.095  18 
  -1  26   1 894.971 314.025  28 
  -1  26   1 847.056 304.825  31 
   1 -26  -1 983.736 299.092  32 
  -1 -26   1 1065.45 308.937   9 
   1 -26  -1 915.142 264.108  26 
   1 -26  -1 946.067 319.361   9 
  -1 -26   1 1038.63 344.692  32 
  -1  26   0 8.94841 240.518  28 
  -1 -26   0-119.022 300.533  32 
  -1  26   0-166.814 289.136  31 
  -1 -26   0-7.44134 234.545   9 
   1  26   0 100.366 208.703  28 
  -1 -26   0 437.710 267.405  18 
   1 -26   0 138.676 259.831   9 
   1  26   0 561.584 343.257  31 
  -1 -26   0-86.2928 243.036  26 
   1 -26   0-383.900 294.561  32 
  -1  26  -1 449.227 308.004  31 
  -1 -26  -1 406.324 247.063  32 
   1  26   1 446.010 295.051  31 
   1 -26   1 369.725 286.816   9 
  -1 -26  -1 230.689 191.735   9 
   1  26   1 146.099 209.126  28 
  -1 -26  -1 499.319 299.399  18 
  -1  26  -1 193.078 214.002  28 
  -1 -26  -1 386.663 254.155  26 
   1 -26   1 608.855 288.268  32 
  -1 -26  -2 804.279 291.065  32 
   1  26   2 1432.67 306.889  31 
  -1  26  -2 1585.23 324.522  20 
  -1  26  -2 657.566 317.733  31 
   1  26   2 883.401 263.067  28 
   1 -26   2 1424.44 371.257   9 
  -1 -26  -2 1401.75 375.342  18 
  -1 -26  -2 743.037 279.953  26 
   1 -26   2 632.968 262.536  32 
   1  26   3 6335.06 468.178  31 
  -1  26  -3 5738.00 517.711  20 
   1  26   3 6119.76 523.561  28 
   1 -26   3 6541.79 490.711  27 
  -1 -26  -3 5969.68 517.291  26 
  -1 -26  -3 6038.77 586.783  18 
  -1 -26  -3 6251.11 531.135  32 
   1 -26   3 6149.04 531.443  32 
   1 -26   3 6219.59 583.313   9 
  -1  26  -3 5550.51 553.641  31 
   1 -26   4 582.187 226.719  32 
   1 -26   4 859.484 296.295   9 
  -1 -26  -4 1455.26 291.495  32 
  -1 -26  -4 1127.03 301.998  18 
   1  26   4 786.644 241.600  28 
   1 -26   4 809.962 221.039  27 
  -1 -26  -4 809.721 240.338  26 
  -1  26  -4 683.484 253.360  20 
  -1  26  -4 925.296 319.483  31 
  -1  26  -5 2966.19 352.203  31 
   1 -26   5 3262.65 346.128  32 
   1 -26   5 3254.80 387.877   9 
  -1 -26  -5 3647.39 384.374  18 
   1  26   5 3579.08 360.898  28 
   1 -26   5 3783.92 356.855  27 
  -1 -26  -5 3542.96 344.626  26 
  -1  26  -5 3688.21 381.882  20 
  -1 -26  -5 3879.85 349.836  32 
   1  27  -4 118.494 184.970  20 
   1 -27  -4 201.445 153.296   9 
  -1 -27   4 182.419 184.833   9 
  -1  27   4-262.552 209.021  28 
   1  27  -4 285.068 210.369  31 
   1 -27  -4 208.518 133.931  26 
  -1 -27   4 248.975 197.470  32 
   1 -27  -4 271.014 171.946  32 
  -1 -27   3-7.38266 198.105  32 
  -1 -27   3 15.1089 184.411   9 
   1  27  -3 67.3329 230.923  31 
  -1  27   3-311.827 234.053  28 
   1 -27  -3 174.406 152.795  26 
   1 -27  -3 148.151 170.103   9 
   1  27  -3 105.044 211.725  20 
   1 -27  -3-113.664 209.521  32 
   1  27  -2 335.977 278.004  31 
   1 -27  -2-89.0152 197.116  32 
  -1 -27   2 166.937 200.168   9 
   1 -27  -2-120.037 200.594   9 
   1 -27  -2 350.063 172.836  26 
  -1  27   2 154.672 226.719  28 
  -1 -27   2 52.1937 217.130  32 
  -1  27   2-12.7676 170.325  31 
  -1  27   1 929.471 268.869  28 
   1  27  -1 922.954 307.904  31 
  -1 -27   1 985.093 254.851   9 
   1 -27  -1 669.726 248.341   9 
  -1  27   1 683.043 266.176  31 
   1 -27  -1 563.507 250.493  32 
  -1 -27   1 452.049 259.469  32 
   1  27   0 2543.75 405.695  31 
  -1  27   0 2260.46 377.240  31 
  -1  27   0 1476.05 309.391  28 
   1  27   0 1907.44 301.606  28 
  -1 -27   0 2603.55 405.265  32 
  -1 -27   0 1973.82 334.214  18 
   1 -27   0 2430.87 370.697  32 
   1 -27   0 2209.45 342.185  18 
  -1 -27   0 2594.31 352.214   9 
   1 -27   0 2116.42 356.742   9 
  -1 -27  -1 122.664 216.559  32 
  -1  27  -1 462.472 277.561  31 
   1  27   1 704.233 258.318  31 
   1 -27   1 411.674 220.789  32 
  -1 -27  -1 626.610 224.463  18 
   1  27   1 491.898 226.334  28 
   1 -27   1 894.472 297.209   9 
  -1 -27  -1 310.389 210.880  26 
  -1 -27  -1 625.376 207.538   9 
   1  27   2-122.982 205.181  28 
   1  27   2 71.0766 166.993  31 
   1 -27   2-36.1082 222.777   9 
  -1  27  -2 69.1356 157.639  20 
  -1  27  -2-205.923 276.139  31 
  -1 -27  -2 110.387 214.968  18 
  -1 -27  -2-111.544 220.479  32 
   1 -27   2-74.2685 182.867  32 
  -1 -27  -2 0.35310 172.014  26 
   1  27   3 1419.60 213.605  31 
   1 -27   3 1171.20 249.034  32 
  -1  27  -3 1607.13 261.114  20 
   1  27   3 1135.35 232.577  28 
  -1 -27  -3 1231.32 248.916  26 
  -1 -27  -3 1266.49 293.743  18 
   1 -27   3 1461.37 301.235   9 
  -1  27  -3 1796.38 343.117  31 
  -1 -27  -3 1330.28 265.088  32 
   1 -27   4 944.901 208.417  32 
   1  27   4 730.863 197.813  28 
  -1  27  -4 757.911 214.322  20 
  -1 -27  -4 763.704 183.683  32 
  -1  27  -4 1139.00 264.378  31 
   1 -27   4 651.015 158.305  27 
  -1 -27  -4 990.603 239.588  18 
   1 -27   4 964.455 248.736   9 
  -1 -27  -4 774.155 195.100  26 
   1  28  -2-209.490 213.802  31 
   1 -28  -2 143.727 161.850  18 
  -1  28   2 130.739 182.662  28 
  -1  28   2 108.365 130.644  31 
  -1 -28   2 42.0520 177.378  32 
   1 -28  -2-22.8043 148.256   9 
   1 -28  -2 14.4997 182.164  32 
   1  28  -2-9.62225 142.979  20 
  -1 -28   2-46.7997 144.151   9 
  -1  28   1-133.245 181.024  31 
  -1 -28   1 66.1005 151.956   9 
   1  28  -1 43.4433 201.116  31 
   1 -28  -1 291.411 196.178  32 
  -1  28   1-152.234 193.277  28 
  -1 -28   1 116.156 182.433  32 
   1 -28  -1 110.627 144.246  18 
   1 -28  -1-50.7360 181.615   9 
   1 -28   0 115.051 186.211  32 
  -1  28   0 82.4872 193.545  31 
   1  28   0 250.792 147.849  28 
   1  28   0 159.380 193.596  31 
  -1 -28   0 17.0715 143.311  18 
   1 -28   0 107.320 112.969  18 
   1 -28   0 399.423 229.350   9 
  -1 -28   0 77.7936 126.106   9 
  -1 -28   0 175.099 193.262  32 
  -1  28   0-170.735 175.049  28 
  -1  28  -1-170.100 232.620  31 
   1 -28   1 360.859 218.576   9 
  -1 -28  -1 1.70967 145.279  18 
   1  28   1 129.458 148.504  28 
  -1 -28  -1 268.328 188.726  32 
   1 -28   1-38.8470 176.131  32 
   1  28   1 127.127 170.105  31 
   1  28   2 60.7600 138.698  28 
  -1  28  -2 412.728 225.612  31 
   1 -28   2-79.1554 154.666  32 
  -1 -28  -2 11.6938 145.048  18 
   1 -28   2 100.827 173.017   9 
  -1 -28  -2-124.144 148.555  26 
   1  28   2 62.0673 134.307  31 
  -1 -28  -2-20.5423 147.476  32 
  -2   0  14 3321.17 364.956  16 
  -2   0  14 3646.67 333.846  35 
   2   0 -14 3336.32 352.536  26 
  -2   0  13 332.429 218.162  35 
   2   0 -13-100.789 162.079  29 
  -2   0  13 70.7720 245.197  16 
   2   0 -12 20030.6 938.484  29 
  -2   0  12 18767.3 1032.19  16 
  -2   0  12 18593.5 996.841  27 
  -2   0  12 18845.6 978.545  35 
  -2   0  11-200.998 328.394  16 
   2   0 -11 37.9553 205.408  29 
  -2   0  11-2.82200 231.292  27 
  -2   0  11 143.259 255.376  35 
   2   0 -10 509.195 202.138  21 
   2   0 -10 12.5986 185.262  29 
  -2   0  10 212.303 183.410  35 
   2   0 -10 148.275 203.674   1 
  -2   0  10-162.873 248.194  22 
  -2   0  10 53.4453 223.090  27 
  -2   0  10-233.802 314.742  16 
  -2   0  10 353.329 252.954  38 
   2   0 -10 216.905 206.153  36 
   2   0  -9 209.971 240.644  36 
  -2   0   9-20.0933 256.808  22 
  -2   0   9-391.920 300.519  23 
  -2   0   9 681.180 337.522  38 
   2   0  -9-73.7729 222.258   1 
   2   0  -8 1188.53 314.084  36 
  -2   0   8 1095.44 320.818  23 
   2   0  -8 1684.49 324.277   1 
  -2   0   8 1206.17 311.661  22 
  -2   0   7-156.151 227.080  22 
   2   0  -7-86.1646 207.151  36 
   2   0  -7 7.40952 158.633   1 
  -2   0   7-389.140 444.455  23 
   2   0  -6 4150.59 394.563   1 
   2   0  -6 3830.81 463.680  36 
  -2   0   6 3047.87 754.928  38 
  -2   0   6 2854.09 524.402  23 
  -2   0   6 4375.46 437.555  22 
   2   0  -5 240.111 137.980   1 
  -2   0   5 145.178 562.222  38 
  -2   0   5 148.183 233.148  23 
   2   0  -5 427.497 215.051  36 
  -2   0   5 177.635 152.856  22 
   2   0  -4 254117. 2338.86   1 
  -2   0   4 257044. 3302.91  23 
  -2   0   4 248607. 2482.53  22 
   2   0  -3 39.3971 31.7926  40 
  -2   0   3-38.2833 112.942  39 
   2   0  -3 103.972 94.1332   1 
  -2   0   3 77.2905 118.889  38 
   2   0  -3-14.8004 121.546  36 
  -2   0   3 8.38977 94.2591  22 
  -2   0   2 207796. 1963.79   5 
  -2   0   2 205077. 1855.59  38 
  -2   0   2 209301. 2031.09  39 
  -2   0   2 207013. 1570.27  22 
   2   0  -2 209011. 1876.50  36 
   2   0  -2 211040. 1574.78   1 
  -2   0   1 2070.57 108.646   2 
  -2   0   1 2332.58 141.657  24 
  -2   0   1 1923.91 110.273  22 
  -2   0   1 2452.11 215.002  39 
  -2   0   0 46815.1 891.080  39 
  -2   0   0 47083.1 755.683   3 
   2   0   0 46112.1 389.574  21 
  -2   0  -1-72.3999 79.1236  39 
  -2   0  -1 10.3734 49.2387   1 
   2   0   1-4.60307 25.2484  22 
   2   0   1-12.2691 82.4898  23 
  -2   0  -1 64.7918 65.6421  36 
  -2   0  -1 45.8350 85.2565   3 
   2   0   1-8.44851 15.9122  37 
  -2   0  -2 906789. 3976.94   1 
  -2   0  -2 898531. 4277.75  39 
   2   0   2 907706. 2971.81  22 
   2   0   2 896462. 4652.88  23 
   2   0   3 174.432 148.167  23 
  -2   0  -3 16.0874 133.075  36 
  -2   0  -3-55.5958 121.982   1 
  -2   0  -3 4.60411 81.6648  39 
   2   0   3-68.2215 93.1594  22 
  -2   0  -4 48290.6 1246.49   1 
  -2   0  -4 51649.5 1519.36  36 
   2   0   4 49518.3 1308.56  23 
   2   0   4 51614.8 1080.17  22 
  -2   0  -5-167.991 259.056  36 
   2   0   5 8.62692 122.305  22 
   2   0   5 102.395 181.788  23 
  -2   0  -5 212.667 170.008   1 
   2   0   6 45636.2 1309.54  22 
   2   0   6 43295.1 1353.72  23 
  -2   0  -6 45865.1 1435.29   1 
  -2   0  -6 45986.9 1643.38  36 
   2   0   7-73.0477 193.356  22 
  -2   0  -7-23.6603 210.581   1 
  -2   0  -7-413.784 312.475  36 
   2   0   7 173.877 207.100  23 
  -2   0  -8 69021.6 2083.18  36 
   2   0   8 63890.1 1765.19  23 
  -2   0  -8 70379.5 1993.33   1 
   2   0   9-213.255 216.083  38 
  -2   0  -9-72.3859 180.545  17 
   2   0   9-110.548 265.396  35 
   2   0   9-497.052 287.777  16 
  -2   0  -9-204.759 269.423  29 
  -2   0  -9 321.928 203.743  36 
   2   0   9 131.283 197.100  23 
   2   0   9 132.161 208.545  34 
  -2   0 -10 1123.46 341.129  29 
   2   0  10 1338.67 341.027  34 
  -2   0 -10 1100.97 342.184  17 
   2   0  10 1079.84 340.698  35 
   2   0  10 1254.30 328.483  16 
  -2   0 -11-8.48436 247.354  29 
  -2   0 -11 18.0396 228.283  17 
   2   0  11-68.0338 211.625  16 
   2   0  11 143.915 251.458  35 
   2   0  11-4.15487 191.767  34 
   2   0  12 1598.31 289.062  34 
   2   0  12 1934.05 355.819  35 
  -2   0 -12 1426.76 288.320  17 
   2   0  12 1169.43 248.163  16 
  -2   0 -12 1403.02 275.121  26 
  -2   0 -12 1393.08 302.571  29 
  -2   0 -13 46.6869 136.224  26 
   2   0  13-48.6582 172.665  35 
  -2   0 -13 190.645 194.426   7 
  -2   0 -13 195.913 176.569  29 
   2   0  13 64.1258 126.202  34 
  -2  -1  14 1792.30 251.796  35 
  -2   1  14 1964.29 268.679  35 
  -2   1  14 1202.25 262.465  16 
  -2  -1  14 1434.02 277.907  16 
   2   1 -14 2161.63 307.836  26 
   2   1 -14 1688.73 219.249  29 
   2  -1 -14 1983.73 293.905  26 
  -2   1  13 1092.72 259.674  35 
   2   1 -13 890.846 223.156  29 
  -2  -1  13 638.837 228.102  27 
  -2   1  13 796.677 291.997  16 
  -2  -1  13 1215.61 264.734  35 
   2  -1 -13 934.060 224.391  29 
  -2  -1  13 1316.10 374.310  16 
   2   1 -12 3345.00 427.667  29 
  -2   1  12 2762.87 418.558  35 
  -2   1  12 2758.47 422.767  27 
  -2  -1  12 2599.18 491.931  16 
  -2  -1  12 2953.14 437.315  27 
  -2   1  12 3007.48 487.277  16 
  -2  -1  12 2990.37 421.502  35 
   2  -1 -12 3410.64 429.782  29 
   2  -1 -11 23947.6 1107.06  29 
  -2  -1  11 22645.2 1109.71  35 
   2   1 -11 21918.5 1114.67  29 
  -2   1  11 24279.8 1178.68  27 
  -2  -1  11 21400.4 1146.87  27 
  -2   1  11 22369.2 1124.71  35 
  -2   1  11 22076.4 1170.52  16 
  -2  -1  11 22583.9 1199.76  16 
  -2   1  10 3021.41 460.423  27 
  -2  -1  10 3090.23 451.952  35 
  -2   1  10 2756.96 422.372  35 
   2  -1 -10 3058.58 459.238  36 
   2   1 -10 3183.41 453.405  36 
  -2   1  10 3106.09 497.270  16 
   2  -1 -10 3149.99 460.993  29 
  -2   1  10 2841.17 485.823  38 
  -2  -1  10 1950.23 383.160  27 
   2  -1 -10 3612.47 497.522   1 
   2  -1 -10 2693.20 442.302  21 
   2   1 -10 2761.25 425.065  29 
  -2  -1  10 2507.37 442.039  16 
  -2  -1  10 2567.71 465.408  38 
   2   1 -10 3536.66 476.520   1 
   2   1 -10 2875.98 449.757  21 
  -2   1  10 2722.17 460.567  22 
   2   1  -9 3114.85 436.497   1 
  -2  -1   9 3617.85 570.429  38 
   2  -1  -9 3137.32 453.556   1 
   2   1  -9 2775.10 456.191  36 
  -2  -1   9 2385.59 440.687  23 
  -2   1   9 3609.51 555.687  38 
   2  -1  -9 2616.32 465.813  36 
  -2   1   9 2385.67 436.834  23 
   2   1  -9 3068.64 459.617  21 
  -2   1   9 3003.05 466.644  22 
  -2  -1   9 2638.69 460.406  22 
  -2   1   8 2018.15 525.708  38 
  -2   1   8 685.128 284.397  22 
  -2  -1   8 782.681 268.073  22 
  -2   1   8 570.806 255.323  23 
   2  -1  -8 729.396 247.538   1 
  -2  -1   8 1772.23 498.345  38 
   2   1  -8 1016.25 306.574  36 
  -2  -1   8 362.375 273.514  23 
   2  -1  -8 652.691 258.087  36 
   2   1  -8 1139.17 282.431   1 
   2   1  -7 677.959 242.433  36 
  -2  -1   7 429.129 306.287  23 
   2   1  -7 861.494 242.868   1 
  -2   1   7 860.679 249.367  22 
   2  -1  -7 468.888 246.916  36 
  -2  -1   7 1960.00 506.475  38 
   2  -1  -7 956.876 250.436   1 
  -2   1   7 454.456 316.696  23 
  -2  -1   7 823.300 257.368  22 
  -2   1   7 2177.80 546.432  38 
  -2   1   6 187.291 172.720  22 
   2   1  -6 57.5836 133.343   1 
  -2   1   6 102.374 455.270  38 
  -2  -1   6-176.328 376.777  23 
   2  -1  -6 192.999 152.593   1 
  -2   1   6-142.289 461.872  23 
   2   1  -6 259.602 213.179  36 
  -2  -1   6-53.1901 578.858  38 
   2  -1  -6 249.348 213.793  36 
  -2  -1   6 339.188 208.405  22 
  -2  -1   5 3051.65 582.437  38 
   2   1  -5 5307.36 384.544   1 
  -2   1   5 4426.39 698.039  38 
   2   1  -5 4628.42 470.226  36 
  -2   1   5 4479.77 624.849  23 
  -2  -1   5 4806.87 581.336  23 
   2  -1  -5 5257.78 408.601   1 
   2  -1  -5 4951.48 460.900  36 
  -2  -1   5 5329.33 425.312  22 
  -2   1   5 4856.69 432.407  22 
   2  -1  -4 1547.58 258.055  36 
   2   1  -4 1706.75 207.040   1 
  -2   1   4 1190.54 298.039  38 
  -2   1   4 1764.43 247.744  22 
   2  -1  -4 1063.36 109.770  40 
  -2  -1   4 1489.67 330.010  38 
   2   1  -4 1345.55 261.456  36 
  -2  -1   4 1804.79 309.574  23 
  -2   1   4 1424.69 215.659  39 
  -2   1   4 1603.36 296.682  23 
  -2  -1   4 1633.78 219.600  22 
   2  -1  -4 1706.53 233.840   1 
  -2  -1   3 248702. 2695.79  38 
  -2   1   3 253754. 2230.75  22 
   2   1  -3 251386. 2530.92  36 
  -2  -1   3 268585. 2668.69  39 
  -2   1   3 248398. 2745.24  38 
  -2  -1   3 273243. 2301.86  25 
  -2   1   3 259040. 2336.63  39 
  -2  -1   3 253739. 2076.90  22 
   2   1  -3 257935. 1880.59   1 
   2  -1  -3 249196. 2564.91  36 
  -2   1   3 251092. 2247.75   5 
   2  -1  -3 253110. 2212.78   1 
  -2   1   2 130.931 84.3820   5 
  -2  -1   2 182.283 66.7520  22 
  -2  -1   2 199.839 62.6687  24 
  -2  -1   2 178.189 108.430   5 
   2  -1  -2 253.038 67.1512  40 
  -2  -1   2 334.013 115.643  38 
   2   1  -2 349.918 73.4040   1 
   2  -1  -2 230.542 85.6543   1 
   2   1  -2 133.999 79.9540  36 
  -2   1   2 237.664 108.354  39 
  -2  -1   2 178.007 108.781  39 
  -2   1   2 126.083 28.0249  24 
  -2   1   2 325.875 121.405  38 
  -2   1   2 222.727 78.8964  22 
  -2  -1   1 87174.3 909.961  24 
  -2   1   1 86989.9 794.466   2 
  -2   1   1 87883.6 1265.33  39 
   2   1  -1 87546.4 549.910   1 
  -2  -1   1 84556.0 1199.76  39 
  -2   1   1 87826.0 820.343  22 
   2   1   0 30.3491 37.1497  37 
  -2  -1   0 15.0209 79.4234   5 
  -2   1   0 57.5843 79.3033  39 
  -2   1   0 54.5575 50.9543  25 
  -2  -1   0 8.87459 63.2531  39 
   2  -1   0 31.3753 53.8618  23 
  -2  -1   0 17.6625 50.0879   3 
  -2   1   0 8.84884 53.3134   3 
   2   1   0 28.5923 21.9422  21 
  -2  -1   0 43.1993 64.8392  24 
  -2  -1  -1 31168.5 592.493   1 
   2   1   1 32268.3 452.412  22 
   2   1   1 32370.4 743.677  23 
  -2   1  -1 34611.6 701.166  36 
  -2   1  -1 31469.8 658.956  25 
  -2  -1  -1 32678.4 624.996  36 
  -2  -1  -1 32010.9 749.716   3 
   2  -1   1 32340.5 783.811  23 
   2   1   1 32407.7 417.437  37 
  -2   1  -1 31813.2 744.397   3 
  -2  -1  -1 30698.9 677.229   5 
  -2  -1  -1 33186.0 700.584  39 
  -2   1  -1 36157.3 886.173  39 
  -2  -1  -2 10146.1 395.642  39 
  -2  -1  -2 10074.7 552.353   3 
  -2   1  -2 9796.30 538.310   3 
  -2   1  -2 10087.4 528.957  39 
  -2  -1  -2 10395.3 442.105   1 
  -2  -1  -2 10077.6 376.992   5 
   2  -1   2 9089.45 288.302  22 
   2   1   2 10051.2 277.546  37 
  -2  -1  -2 10233.2 461.076  36 
  -2   1  -2 9677.47 451.999  36 
   2  -1   2 9498.20 506.547  23 
  -2   1  -2 9506.38 407.059   1 
   2   1   2 9881.62 340.044  22 
   2   1   2 9743.30 492.001  23 
  -2   1  -2 9518.43 208.457  21 
  -2   1  -3 162672. 2291.05  39 
  -2  -1  -3 151799. 1964.66   1 
   2   1   3 149667. 2087.26  23 
  -2   1  -3 154821. 1932.01   1 
  -2  -1  -3 162348. 1440.69   5 
  -2  -1  -3 165189. 1671.34  39 
   2   1   3 156928. 1662.31  22 
  -2   1  -3 159008. 1276.90  21 
  -2  -1  -3 159224. 2322.89  36 
   2  -1   3 146696. 2144.88  23 
  -2   1  -3 149914. 2143.62  36 
   2  -1   3 163286. 1571.41  22 
  -2  -1  -4 820.096 101.958   5 
  -2  -1  -4 894.772 220.651   1 
  -2   1  -4 852.565 129.590  21 
  -2   1  -4 657.290 213.599  36 
  -2   1  -4 767.722 181.319  39 
  -2   1  -4 610.064 187.946   1 
   2  -1   4 674.064 210.833  23 
  -2  -1  -4 817.643 226.397  36 
   2  -1   4 659.386 144.626  22 
  -2  -1  -4 809.857 129.746  39 
   2   1   4 842.077 224.776  23 
   2   1   4 800.487 168.577  22 
  -2   1  -5 1110.53 202.834  39 
   2   1   5 1017.43 239.409  23 
  -2   1  -5 576.961 215.853  36 
  -2  -1  -5 1211.43 258.333   1 
  -2   1  -5 1241.30 262.963   1 
   2   1   5 950.081 202.355  22 
   2  -1   5 1208.51 282.537  23 
  -2  -1  -5 418.475 237.312  36 
   2  -1   5 897.984 199.343  22 
  -2   1  -5 1061.46 166.326  21 
   2   1   6 2744.99 371.906  23 
   2  -1   6 2919.59 396.345  23 
   2   1   6 2927.23 352.700  22 
   2  -1   6 2633.27 330.930  22 
  -2   1  -6 2988.77 405.208   1 
  -2   1  -6 2463.68 392.909  36 
  -2  -1  -6 2758.90 424.505  36 
  -2  -1  -6 2959.47 413.822   1 
  -2  -1  -7 48184.1 1590.67   1 
  -2   1  -7 47243.8 1554.65   1 
  -2   1  -7 50105.7 1764.21  36 
   2   1   7 46965.8 1433.14  23 
   2  -1   7 49406.1 1482.52  22 
   2  -1   7 45454.8 1455.54  23 
  -2  -1  -7 50973.2 1784.21  36 
   2   1   7 49288.7 1487.12  22 
   2  -1   8 5489.90 572.333  23 
  -2   1  -8 6238.17 653.680  36 
  -2  -1  -8 6142.60 638.197   1 
   2   1   8 6993.45 630.628  22 
   2   1   8 6304.63 574.803  23 
  -2  -1  -8 6086.37 626.940  36 
  -2   1  -9 1903.71 397.299  29 
  -2   1  -9 2136.02 428.005  36 
  -2  -1  -9 1913.02 376.921   1 
  -2  -1  -9 1707.96 360.294  17 
  -2   1  -9 1406.40 352.683  17 
   2  -1   9 2261.50 416.778  16 
   2   1   9 2219.24 373.198  38 
   2   1   9 2058.70 392.489  16 
   2  -1   9 1801.61 364.836  23 
   2  -1   9 2126.97 413.404  34 
  -2  -1  -9 2187.18 412.287  29 
   2   1   9 2105.03 408.369  35 
   2   1   9 2265.24 406.878  34 
   2  -1   9 2348.44 398.277  38 
   2   1   9 2682.21 404.556  23 
  -2  -1  -9 2721.48 439.198  36 
   2  -1   9 2010.57 401.793  35 
  -2   1 -10 5496.03 609.004  17 
   2   1  10 5518.52 611.327  35 
  -2  -1 -10 5796.77 602.731  17 
   2   1  10 5502.59 597.930  34 
   2  -1  10 4878.73 603.129  35 
   2  -1  10 5029.95 548.991  16 
   2   1  10 5501.25 561.100  16 
  -2  -1 -10 5662.16 599.830  29 
  -2   1 -10 6054.09 618.659  29 
   2  -1  10 5902.53 618.929  34 
  -2  -1 -11 2131.73 368.448  17 
  -2  -1 -11 1779.45 367.826  29 
  -2   1 -11 1836.77 366.301  29 
  -2   1 -11 2024.73 374.961  17 
   2   1  11 2053.31 359.079  34 
   2  -1  11 1739.55 330.137  16 
   2  -1  11 1591.73 346.783  34 
   2   1  11 2271.42 420.967  35 
   2   1  11 1930.10 332.279  16 
   2  -1  11 1883.85 399.657  35 
  -2   1 -12 524.679 223.063  17 
  -2  -1 -12 607.285 259.550  29 
  -2   1 -12 470.932 236.335  29 
  -2  -1 -12 621.129 221.322  17 
   2  -1  12 612.115 210.065  34 
  -2  -1 -12 275.092 176.276  26 
   2   1  12 846.049 285.379  35 
   2   1  12-5.45146 182.393  16 
   2  -1  12 819.728 303.367  35 
   2  -1  12 473.820 177.800  16 
  -2   1 -12 523.664 212.841  26 
   2   1  12 691.237 224.352  34 
  -2  -1 -13 8286.00 494.943  29 
   2   1  13 8170.74 524.658  35 
  -2   1 -13 8264.39 498.322  29 
  -2   1 -13 8638.22 539.081   7 
  -2  -1 -13 8454.18 562.930   7 
  -2   1 -13 7531.24 440.797  26 
   2   1  13 8809.14 475.651  34 
   2  -1  13 8723.73 459.771  34 
  -2  -1 -13 7543.02 441.787  26 
   2  -1  13 8922.21 532.818  35 
  -2  -2  14 740.173 230.112  16 
  -2  -2  14 1468.52 224.681  35 
   2   2 -14 1137.83 194.081  29 
  -2   2  14 925.389 241.459  16 
  -2   2  14 1527.98 242.755  35 
   2  -2 -14 1224.39 240.190  26 
  -2  -2  13 842.940 331.653  16 
   2   2 -13 507.957 192.705  29 
  -2  -2  13 776.984 256.352  27 
  -2   2  13 585.973 275.060  16 
  -2   2  13 813.462 251.784  35 
  -2  -2  13 641.388 206.066  35 
   2  -2 -12 3945.27 450.970  29 
  -2  -2  12 3752.09 463.217  35 
  -2  -2  12 3217.31 456.383  27 
  -2  -2  12 3371.04 511.219  16 
   2   2 -12 3730.06 445.027  29 
  -2   2  12 4167.25 477.497  35 
  -2   2  12 3618.17 504.114  16 
  -2   2  11 4064.54 495.710  27 
  -2   2  11 4004.78 539.109  16 
  -2   2  11 4151.41 524.447  35 
   2  -2 -11 3926.29 475.444  29 
  -2  -2  11 4279.55 524.886  35 
  -2  -2  11 3552.56 519.026  27 
  -2  -2  11 3522.64 524.312  16 
   2   2 -11 3944.70 508.786  29 
  -2   2  10 6986.42 658.432  27 
  -2  -2  10 7619.21 776.033  38 
   2   2 -10 7868.38 672.818  36 
   2   2 -10 7150.61 645.141  29 
   2  -2 -10 6864.59 663.578   1 
   2   2 -10 7976.73 690.590   1 
  -2   2  10 8448.24 801.408  38 
  -2  -2  10 6940.60 660.369  35 
   2  -2 -10 7925.80 711.869  36 
  -2   2  10 6650.41 675.913  22 
  -2  -2  10 6314.17 668.315  27 
  -2  -2  10 6885.40 719.943  16 
  -2   2  10 7387.14 675.548  35 
  -2   2  10 7745.32 722.241  16 
   2   2 -10 7577.03 706.826  21 
  -2   2   9 2796.38 500.214  38 
   2   2  -9 2228.27 375.279  37 
   2  -2  -9 2490.20 414.805   1 
   2  -2  -9 2058.55 418.808  36 
  -2   2   9 2326.20 410.769  22 
  -2  -2   9 2940.51 543.168  38 
  -2   2   9 1934.93 392.155  23 
  -2  -2   9 1738.62 363.487  23 
   2   2  -9 2703.33 437.107  36 
   2   2  -9 2686.93 408.991   1 
   2   2  -9 2678.30 430.124  21 
   2   2  -8 5600.42 545.771   1 
   2   2  -8 6578.78 605.102  21 
   2  -2  -8 5710.13 557.693   1 
  -2  -2   8 8190.49 853.917  38 
   2  -2  -8 5668.10 599.047  36 
   2   2  -8 5592.38 589.979  36 
  -2   2   8 6289.46 645.632  23 
  -2  -2   8 5665.61 584.689  22 
  -2  -2   8 4583.75 652.252  23 
  -2   2   8 9294.23 851.534  38 
  -2   2   8 5283.62 568.142  22 
  -2  -2   7-344.872 455.183  23 
  -2   2   7-348.758 356.306  23 
   2  -2  -7-46.2899 151.165   1 
   2   2  -7-56.1655 219.820  36 
  -2  -2   7 287.507 367.908  38 
  -2   2   7 931.625 447.815  38 
  -2  -2   7 83.8023 201.580  22 
   2  -2  -7 7.23480 189.508  36 
  -2   2   7 163.984 207.130  22 
   2   2  -7 69.5086 147.729   1 
  -2  -2   6 863.569 322.811  23 
  -2   2   6 1311.64 302.076  22 
   2  -2  -6 1396.33 275.278   1 
  -2   2   6 106.695 362.354  23 
  -2   2   6 2094.71 515.630  38 
   2  -2  -6 1465.74 307.148  36 
   2   2  -6 1210.93 315.200  36 
  -2  -2   6 807.504 316.930  38 
   2   2  -6 1439.80 254.042   1 
  -2  -2   6 1382.04 282.642  22 
  -2  -2   5 796.973 297.092  23 
   2   2  -5 901.537 175.616   1 
  -2  -2   5 571.051 367.326  38 
  -2   2   5 811.919 304.686  23 
  -2   2   5 505.976 307.898  38 
   2  -2  -5 966.458 250.526  36 
   2   2  -5 1001.48 287.465  36 
  -2   2   5 1325.58 257.346  22 
  -2  -2   5 1080.50 225.605  22 
   2  -2  -5 1096.67 228.380   1 
   2  -2  -4 56144.0 1208.50   1 
  -2  -2   4 56348.3 1513.06  23 
   2  -2  -4 52703.3 1320.51  36 
  -2   2   4 54787.9 1115.81  39 
  -2  -2   4 53427.7 1642.87  38 
   2   2  -4 55119.9 1000.78   1 
  -2   2   4 56152.7 1518.08  23 
  -2   2   4 53523.8 1695.69  38 
  -2   2   4 55301.0 1232.53  22 
  -2  -2   4 58044.6 1151.93  22 
   2  -2  -4 51355.8 883.093  40 
   2   2  -4 55209.7 1315.37  36 
   2  -2  -3 8341.12 332.506  40 
  -2   2   3 7936.69 406.748  39 
  -2  -2   3 7977.89 392.882  25 
  -2   2   3 6828.54 368.875   5 
   2   2  -3 6877.55 287.848   1 
  -2  -2   3 7254.78 355.503  22 
   2  -2  -3 7646.96 459.969  36 
  -2  -2   3 7732.23 474.640  38 
   2  -2  -3 6776.54 383.618   1 
   2   2  -3 8061.22 463.774  36 
  -2   2   3 8049.24 500.318  38 
  -2   2   3 7192.91 404.664  22 
   2   2  -2 34225.8 695.372  21 
   2   2  -2 33877.5 426.082   1 
  -2  -2   2 32630.6 731.782  38 
  -2   2   2 33493.8 775.282  38 
   2  -2  -2 33611.6 695.108   1 
  -2  -2   2 34664.4 909.967  39 
  -2   2   2 33682.7 741.694  22 
   2   2  -2 34461.5 797.629  36 
   2  -2  -2 35235.1 615.743  40 
  -2  -2   2 33529.1 663.408  25 
  -2  -2   2 33959.2 649.791  24 
  -2   2   2 32450.1 785.908   4
[truncated: 2,589,680 more chars]
